# Supplementary material for: Insoluble/soluble fraction ratio determines effects of dietary fiber on gut microbiota and serum metabolites in healthy mice
Source: Royal Society of Chemistry journal article supplement (doi:10.1039/d3fo04068b), 2023-11-28

# **Insoluble/soluble fraction ratio determines effects of dietary fiber on gut microbiota and serum metabolites in healthy mice**

Yanli Zhang, Jielun Hu, Yadong Zhong, Shuai Liu, Liandi Liu, Xinyi Mu, Chunhua Chen, Shenji Yang, Guohao Li, Duoduo Zhang, Xinru Huang, Jinrui Yang, Xiaojun Huang, Shuigen Bian, Shaoping Nie\*

## **Addresses**

State Key Laboratory of Food Science and Resources, China-Canada Joint Lab of Food Science and Technology (Nanchang), Key Laboratory of Bioactive Polysaccharides of Jiangxi Province, Nanchang University, 235 Nanjing East Road, Nanchang 330047, China

**\*Corresponding author:** Shaoping Nie, Phone: +86-791-88304452; Email: [spnie@ncu.edu.cn](mailto:spnie@ncu.edu.cn).

**Table S1 The composition of nine dietary fiber recipes used in this study**

| Ingredients         | Groups      |           |
|---------------------|-------------|-----------|
|                     | AIN93G diet | IxSyDF_CF |
| Casein, 30mech      | 20.00%      | 20.00%    |
| L-cystine           | 0.30%       | 0.30%     |
| Corn starch         | 39.75%      | 39.75%    |
| Maltodextrin        | 13.20%      | 13.20%    |
| Sucrose             | 10.00%      | 10.00%    |
| Cellulose           | 5.00%       | -         |
| Soybean oil         | 7.00%       | 7.00%     |
| T-butylhydroquinone | 0.0014%     | 0.0014%   |
| Mineral mix s10022G | 3.50%       | 3.50%     |
| Vitamin mix V10037  | 1.00%       | 1.00%     |
| Choline bitartrate  | 0.25%       | 0.25%     |
| IxSyDF              | -           | 5.00%     |

Note: IxSyDF represents I1S9DF, I2S8DF, I3S7DF, I4S6DF, I5S5DF, I6S4DF, I7S3DF, I8S2DF, and I9S1DF.

## Figures legends:

**Figure S1.** Animal experiment design.

**Figure S2.** HPGPC chromatograms of (A) ASDF; (B) CSDF; (C) KSDF; (D) BSDF; (E) OSDF; (F) SSDF.

**Figure S3.** PCA score plots (A) between I1S9DF and Control groups; (B) between I2S8DF and Control groups; (C) between I3S7DF and Control groups; (D) between I4S6DF and Control groups; (E) between I5S5DF and Control groups; (F) between I6S4DF and Control groups; (G) between I7S3DF and Control groups; (H) between I8S2DF and Control groups; (I) between I9S1DF and Control groups.

**Figure S4.** The chemRICH enrichment analysis illustrates the markedly affected metabolites clusters ( $p < 0.05$ ) (A) between I1S9DF and Control groups, (B) between I2S8DF and Control groups, (C) between I3S7DF and Control groups, (D) between I4S6DF and Control groups, (E) between I5S5DF and Control groups, (F) between I6S4DF and Control groups, (G) between I7S3DF and Control groups, (H) between I8S2DF and Control groups, (I) between I9S1DF and Control groups. The plot y-axis represents the remarkably changed clusters. The total of metabolites was represented by the sizes of node. The colors of the cluster indicate the trend of increased or decreased metabolites (red = totally increased, blue = totally reduced, fuchsia = both but major increased, dark orchid = both but major decreased).

**Figure S5.** Pathway analysis of markedly affected metabolites (A) between I1S9DF and Control groups; (B) between I2S8DF and Control groups; (C) between I3S7DF and Control groups, (D) between I4S6DF and Control groups, (E) between I5S5DF and Control groups, (F) between I6S4DF and Control groups, (G) between I7S3DF and Control groups, (H) between I8S2DF and Control groups, (I) between I9S1DF and Control groups by using MetaboAnalyst 5.0 (based on  $p < 0.05$ , impact factor  $> 0.1$ ).

Figure S1

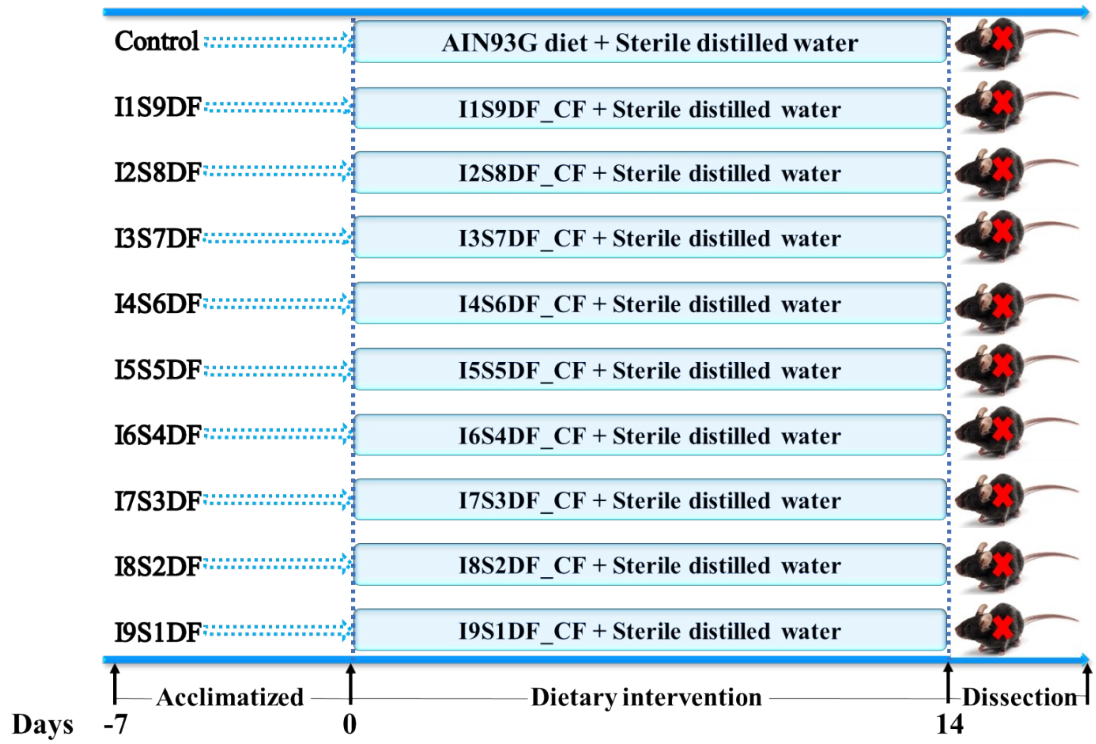

Figure S2

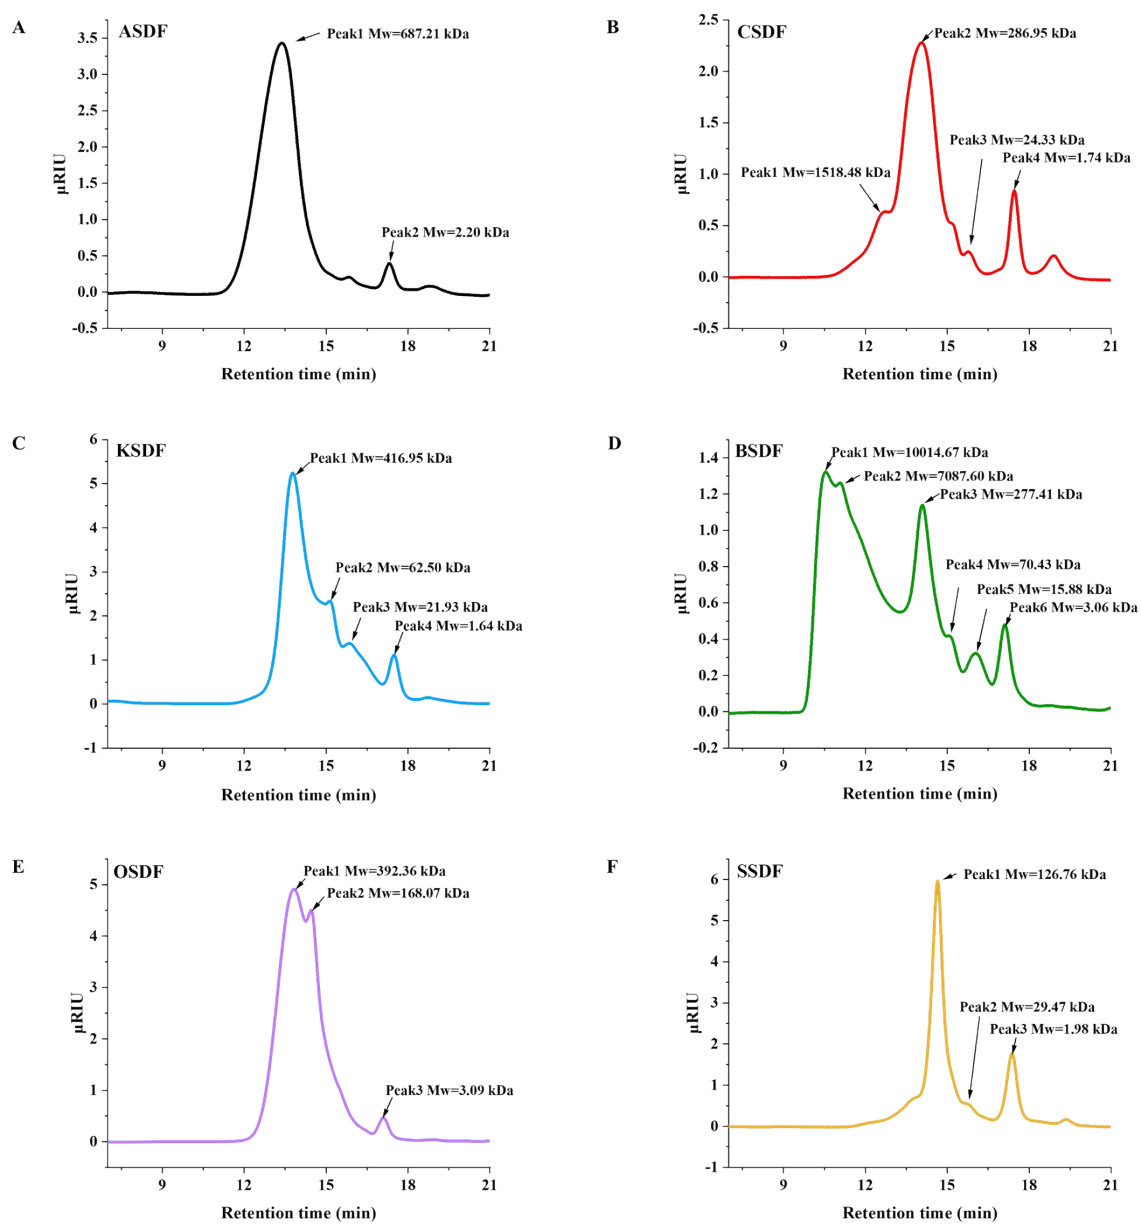

Figure S3

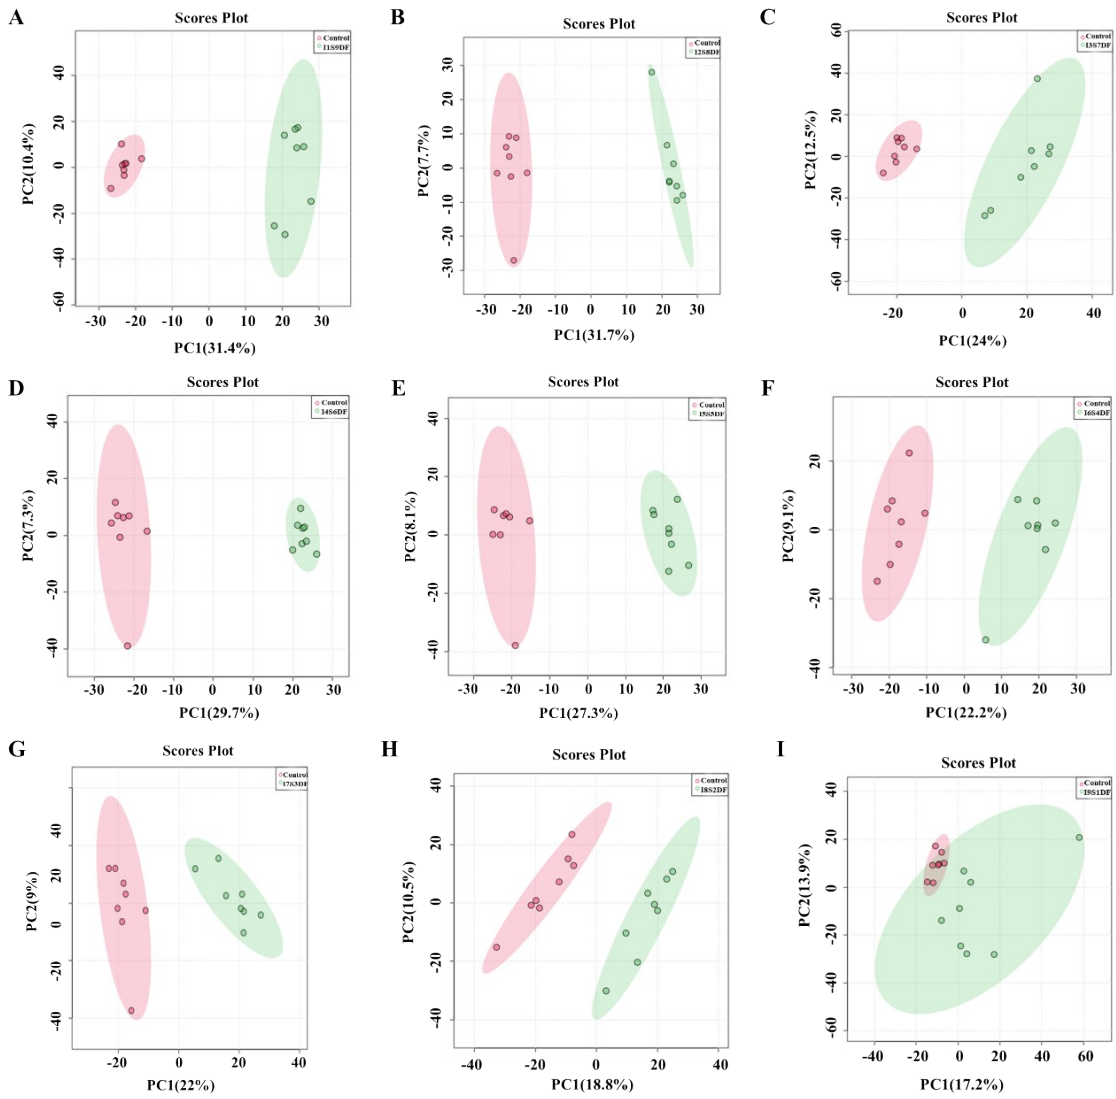

Figure S4

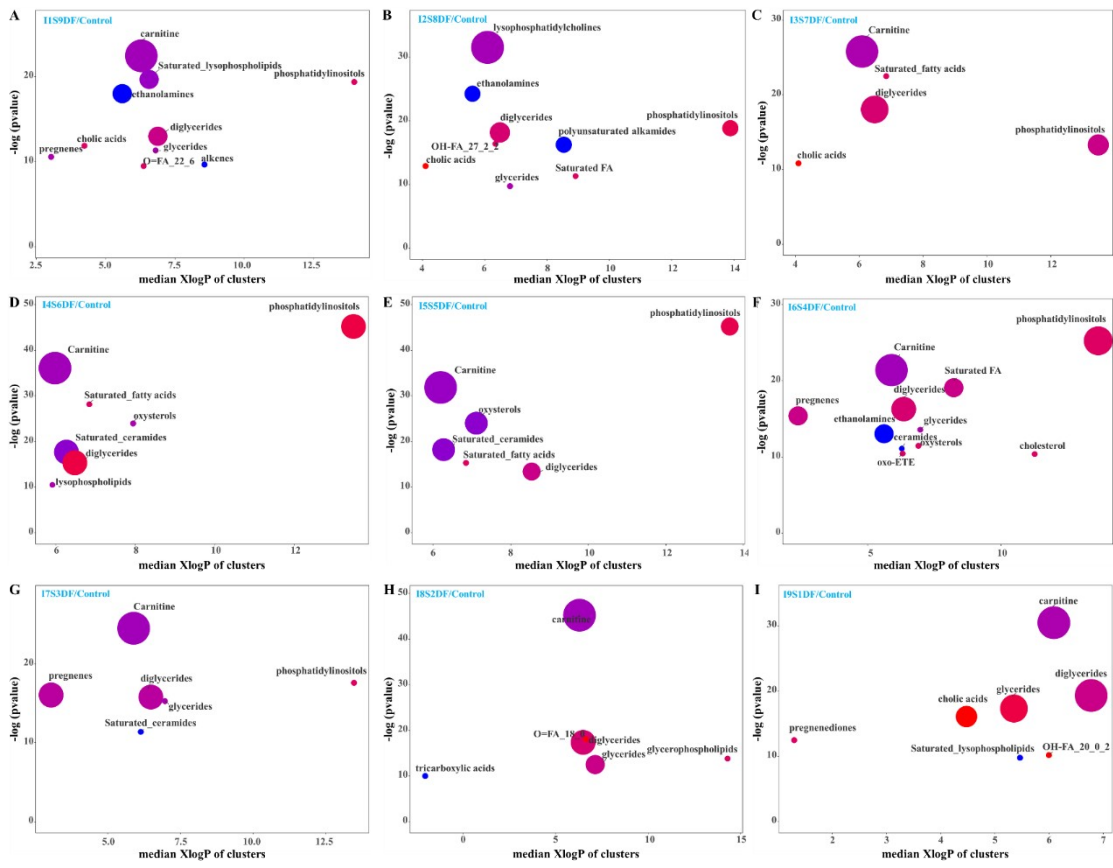

Figure S5

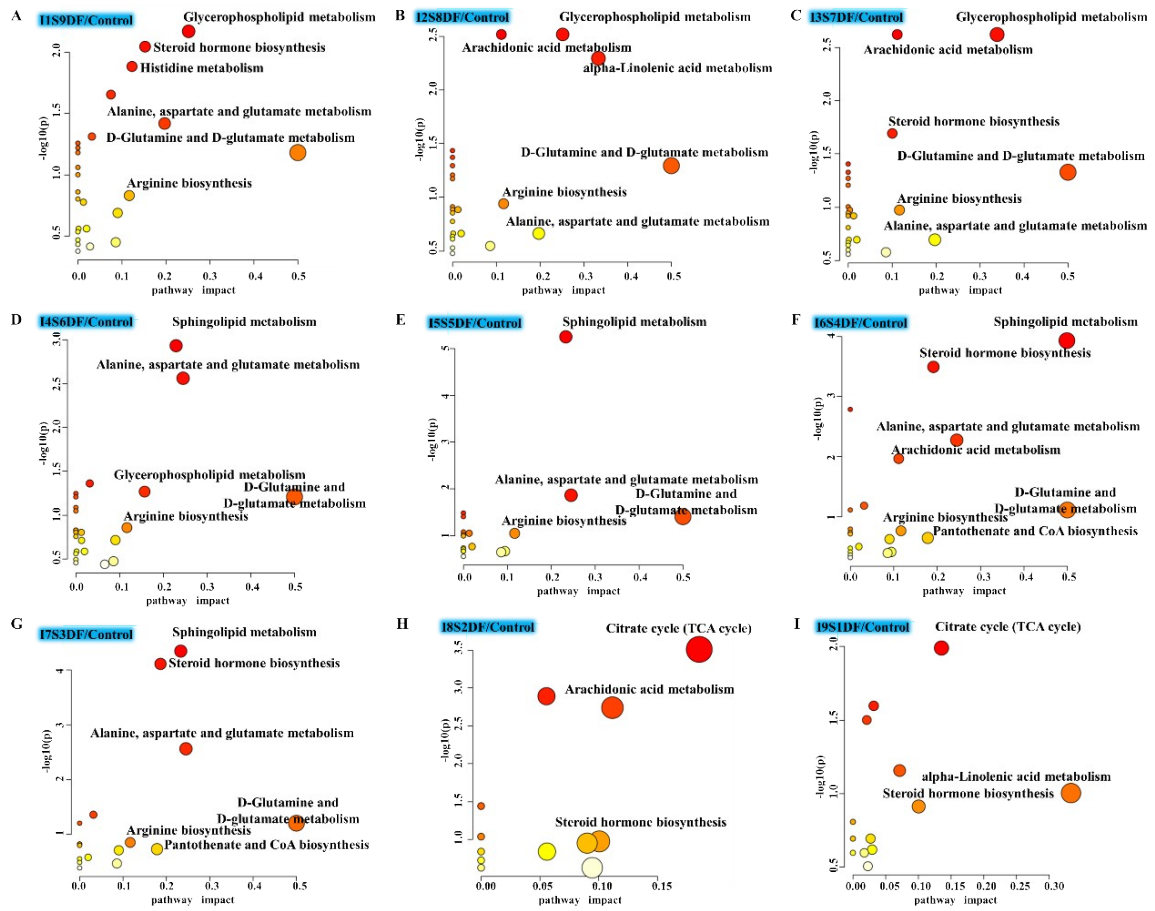

Supplement: d3fo04068b2.pdf [file d3fo04068b2.pdf]
