# Supplementary material for: Insoluble/soluble fraction ratio determines effects of dietary fiber on gut microbiota and serum metabolites in healthy mice
Source: Royal Society of Chemistry journal article supplement (doi:10.1039/d3fo04068b), 2023-11-28
Supplement: d3fo04068b1.xlsx [file d3fo04068b1.xlsx]

## Sheet: Figure1
Wavenumbers	ASDF	CSDF	KSDF	BSDF	OSDF	SSDF	AIDF	CIDF	KIDF	BIDF	OIDF	SIDF
399	98.5	98.2935	99.5045	100	100	100	99.1454	99.9585	99.6591	98.5871	98.8437	100
401	98.5	98.3036	99.5806	99.7091	99.8784	99.8727	99.1898	99.9205	99.7346	98.8004	98.8687	99.4611
403	98.6	98.3511	99.6794	99.4379	99.7641	99.7795	99.2113	99.8226	99.7895	98.983	98.8728	98.9485
405	98.8	98.4846	99.7695	99.3227	99.7103	99.7251	99.1938	99.5945	99.7455	99.0298	98.8146	98.7173
407	99	98.529	99.789	99.2677	99.6979	99.6265	99.1296	99.3935	99.6441	99.0273	98.7709	98.6411
409	99	98.4753	99.7509	99.208	99.6972	99.4866	99.0089	99.2297	99.4923	99.0057	98.7549	98.6037
411	99	98.3465	99.6637	99.1333	99.6904	99.3151	98.8467	99.0919	99.304	98.9729	98.7542	98.5744
413	98.9	98.1627	99.5401	99.0229	99.6598	99.1261	98.6502	98.9702	99.0982	98.9413	98.7548	98.5096
415	98.8	97.9903	99.405	98.9135	99.6162	98.945	98.4438	98.8346	98.8851	98.8947	98.7292	98.4575
417	98.7	97.7959	99.2433	98.7785	99.5463	98.7534	98.2296	98.7175	98.6734	98.8537	98.6919	98.3789
418	98.5	97.6063	99.0709	98.6125	99.4435	98.5634	98.02	98.621	98.4864	98.829	98.6244	98.2519
420	98.3	97.4526	98.9052	98.4259	99.3085	98.392	97.823	98.5192	98.3268	98.813	98.517	98.0833
422	98.2	97.3556	98.7513	98.2376	99.149	98.241	97.653	98.4137	98.203	98.8031	98.3604	97.9006
424	98.1	97.3179	98.6134	98.0596	98.974	98.1102	97.5139	98.3074	98.1197	98.7984	98.1546	97.7196
426	98	97.3314	98.4936	97.8966	98.7933	97.9947	97.4038	98.2051	98.0732	98.7995	97.9124	97.5481
428	98	97.3852	98.3928	97.7506	98.6144	97.8867	97.3185	98.1145	98.0564	98.8073	97.6458	97.3879
430	98.1	97.4728	98.3129	97.6287	98.4453	97.7827	97.2532	98.0352	98.0599	98.8181	97.3638	97.2471
432	98.2	97.5762	98.2506	97.5321	98.2909	97.6756	97.2007	97.9682	98.0701	98.8297	97.0818	97.127
434	98.3	97.6743	98.2008	97.4571	98.1529	97.5583	97.1517	97.9124	98.0735	98.8409	96.813	97.0222
436	98.4	97.751	98.1597	97.3963	98.0294	97.4283	97.0966	97.8637	98.0581	98.8499	96.5671	96.924
438	98.5	97.7949	98.1239	97.3412	97.9159	97.2875	97.0286	97.8154	98.013	98.8539	96.3531	96.8226
440	98.6	97.8031	98.0902	97.284	97.8064	97.1393	96.945	97.7625	97.9325	98.8503	96.1726	96.7126
442	98.6	97.7811	98.0562	97.2215	97.6949	96.9907	96.8484	97.7026	97.8188	98.836	96.0194	96.5948
444	98.6	97.736	98.0198	97.151	97.5765	96.8485	96.7423	97.6348	97.6795	98.8094	95.8835	96.4717
445	98.6	97.6741	97.9794	97.0693	97.4486	96.7193	96.63	97.5603	97.5253	98.7707	95.7555	96.3467
447	98.6	97.6008	97.9336	96.9728	97.3112	96.6068	96.5148	97.4821	97.3685	98.7222	95.6284	96.2233
449	98.6	97.5219	97.8808	96.8597	97.1672	96.5118	96.4	97.4046	97.2216	98.6681	95.4992	96.1044
451	98.5	97.4426	97.8206	96.7303	97.021	96.4317	96.2889	97.3334	97.0956	98.6145	95.3671	95.9921
453	98.5	97.3681	97.7538	96.5875	96.8783	96.3613	96.1841	97.274	96.9981	98.5673	95.2322	95.8877
455	98.5	97.3017	97.6817	96.4364	96.7448	96.2947	96.0876	97.2295	96.9322	98.5315	95.0953	95.7919
457	98.4	97.2437	97.6048	96.2842	96.6253	96.2259	96.0004	97.1991	96.8963	98.5106	94.9583	95.7044
459	98.4	97.1918	97.5234	96.1385	96.5231	96.1498	95.9228	97.1794	96.8852	98.5065	94.8247	95.6244
461	98.4	97.1435	97.4384	96.0062	96.4388	96.0631	95.8545	97.1655	96.8905	98.5183	94.6985	95.551
463	98.4	97.0979	97.3516	95.8932	96.3706	95.9659	95.795	97.1529	96.9025	98.5435	94.584	95.484
465	98.4	97.0573	97.2662	95.8038	96.3148	95.8622	95.7444	97.1392	96.912	98.5774	94.4838	95.4238
467	98.4	97.0244	97.186	95.7408	96.2668	95.7583	95.7028	97.1237	96.9115	98.6145	94.3979	95.3724
469	98.4	97.001	97.1147	95.7048	96.2221	95.6617	95.6702	97.1073	96.8966	98.6496	94.3243	95.3316
471	98.4	96.9858	97.0555	95.6928	96.1771	95.5798	95.6458	97.0922	96.865	98.6787	94.2604	95.3025
472	98.5	96.9765	97.0106	95.699	96.1295	95.5179	95.6281	97.0805	96.8169	98.6993	94.204	95.2851
474	98.5	96.9718	96.9816	95.7163	96.0783	95.4787	95.6158	97.0737	96.7551	98.7107	94.1541	95.2785
476	98.5	96.9724	96.9698	95.7381	96.0244	95.462	95.608	97.072	96.6846	98.7141	94.1104	95.2811
478	98.5	96.9789	96.9759	95.7591	95.9698	95.4647	95.6041	97.0751	96.6111	98.7121	94.0724	95.2913
480	98.5	96.99	97	95.7757	95.9177	95.4815	95.604	97.0815	96.5402	98.7079	94.0387	95.3082
482	98.6	97.0036	97.0405	95.7866	95.8709	95.5055	95.6075	97.089	96.4769	98.7046	94.0069	95.3312
484	98.6	97.0166	97.0949	95.7923	95.8317	95.5294	95.615	97.0952	96.4262	98.7049	93.9752	95.3599
486	98.6	97.0272	97.1604	95.7952	95.8013	95.5465	95.6265	97.0989	96.3923	98.7111	93.9436	95.3945
488	98.6	97.035	97.2341	95.7979	95.7793	95.5526	95.642	97.0999	96.3781	98.7242	93.914	95.4355
490	98.6	97.0412	97.3137	95.803	95.7639	95.5464	95.6607	97.0995	96.3844	98.7444	93.8895	95.4836
492	98.7	97.047	97.3974	95.8126	95.7526	95.5299	95.6821	97.1	96.4102	98.7714	93.8729	95.5394
494	98.7	97.0521	97.4832	95.8286	95.7426	95.508	95.7056	97.104	96.4524	98.8045	93.8662	95.6033
496	98.8	97.0552	97.5693	95.8522	95.7318	95.4872	95.7309	97.1134	96.5063	98.8426	93.87	95.6757
498	98.8	97.0555	97.6538	95.8833	95.7189	95.4741	95.7579	97.1291	96.5653	98.8847	93.8841	95.7567
499	98.9	97.054	97.7349	95.9211	95.7033	95.4743	95.7866	97.1502	96.6218	98.9294	93.9077	95.8461
501	99	97.0527	97.8114	95.9651	95.6861	95.492	95.817	97.1744	96.668	98.9751	93.9404	95.9436
503	99	97.0525	97.8822	96.0145	95.6695	95.5288	95.8486	97.1988	96.6968	99.02	93.981	96.0485
505	99.1	97.0525	97.947	96.069	95.6566	95.5836	95.8805	97.2207	96.7024	99.0623	94.027	96.1599
507	99.1	97.0506	98.0052	96.1282	95.6506	95.6522	95.9111	97.2374	96.6816	99.0993	94.0744	96.2763
509	99.1	97.0453	98.057	96.1915	95.654	95.7285	95.9385	97.247	96.6339	99.1284	94.1179	96.395
511	99.2	97.0373	98.1034	96.2584	95.6689	95.8053	95.9601	97.2484	96.5625	99.1472	94.1534	96.5127
513	99.2	97.0279	98.1454	96.3277	95.6959	95.8758	95.9739	97.241	96.4726	99.1531	94.1785	96.6257
515	99.2	97.0186	98.1842	96.3971	95.734	95.935	95.9774	97.2244	96.3708	99.1443	94.1931	96.7301
517	99.1	97.0099	98.2213	96.4632	95.7803	95.9797	95.9692	97.1976	96.2643	99.1193	94.1985	96.8219
519	99.1	97.0009	98.258	96.5226	95.8308	96.0095	95.949	97.1597	96.1593	99.0778	94.1959	96.898
521	99	96.9911	98.2953	96.5721	95.8809	96.0258	95.918	97.1099	96.0605	99.0206	94.1862	96.9558
523	99	96.9806	98.3335	96.6086	95.9262	96.0316	95.8783	97.0476	95.9696	98.9495	94.1698	96.9942
525	98.9	96.9709	98.3724	96.6297	95.9627	96.0301	95.8333	96.9732	95.8855	98.8673	94.147	97.0131
526	98.8	96.9632	98.4113	96.634	95.9873	96.0247	95.7863	96.8884	95.8042	98.7776	94.1184	97.0135
528	98.8	96.9573	98.4488	96.6214	95.9987	96.0177	95.7402	96.7961	95.7201	98.6843	94.085	96.9974
530	98.7	96.9513	98.4829	96.5932	95.9968	96.0095	95.6969	96.7001	95.6264	98.5913	94.0478	96.9666
532	98.6	96.9428	98.5113	96.5524	95.9828	95.999	95.6568	96.6046	95.5168	98.5027	94.0059	96.923
534	98.6	96.9309	98.5316	96.5024	95.9591	95.9832	95.6189	96.513	95.3869	98.4216	93.9573	96.8671
536	98.5	96.917	98.5419	96.4475	95.9285	95.959	95.5814	96.4281	95.2349	98.3509	93.8992	96.7991
538	98.5	96.9031	98.5404	96.3916	95.8938	95.9238	95.5417	96.3507	95.0626	98.2919	93.8301	96.7189
540	98.5	96.8903	98.5256	96.3377	95.8572	95.8764	95.497	96.2798	94.8748	98.2446	93.7496	96.6264
542	98.5	96.8787	98.4969	96.2874	95.8197	95.8176	95.4448	96.2128	94.68	98.208	93.6591	96.5221
544	98.5	96.8679	98.4544	96.2409	95.7813	95.7501	95.383	96.1458	94.4889	98.1797	93.561	96.4069
546	98.5	96.8581	98.3993	96.1977	95.7413	95.6785	95.3109	96.0751	94.313	98.1569	93.4576	96.2831
548	98.4	96.8504	98.3333	96.1559	95.6984	95.6084	95.2285	95.9981	94.1629	98.1366	93.3512	96.1541
550	98.4	96.846	98.2588	96.1128	95.6514	95.546	95.1378	95.914	94.0468	98.1158	93.2445	96.0244
552	98.4	96.8452	98.1786	96.0653	95.5993	95.4963	95.0413	95.8243	93.9694	98.0923	93.1402	95.8995
553	98.4	96.8464	98.0959	96.0106	95.5422	95.4625	94.9428	95.7322	93.9311	98.0644	93.0419	95.7852
555	98.4	96.8472	98.0136	95.9471	95.481	95.4452	94.8461	95.6419	93.9275	98.0313	92.9534	95.6869
557	98.4	96.8451	97.9344	95.8746	95.4175	95.442	94.7546	95.5574	93.9499	97.9935	92.8776	95.6087
559	98.3	96.8392	97.8611	95.7947	95.3544	95.4478	94.6716	95.4822	93.9866	97.9523	92.8162	95.5531
561	98.3	96.83	97.7956	95.7106	95.2947	95.456	94.5997	95.4178	94.0242	97.9099	92.769	95.5205
563	98.3	96.8182	97.7392	95.6269	95.2413	95.4592	94.5405	95.3646	94.0497	97.8688	92.7348	95.5099
565	98.2	96.8039	97.6924	95.5486	95.1964	95.4511	94.4948	95.3208	94.0516	97.8308	92.7121	95.5186
567	98.2	96.7867	97.6552	95.481	95.1611	95.4273	94.4619	95.2834	94.0228	97.7973	92.6997	95.5431
569	98.1	96.7667	97.6272	95.4282	95.135	95.3862	94.4398	95.2484	93.9608	97.7687	92.6968	95.5791
571	98.1	96.7452	97.6073	95.3934	95.1169	95.3291	94.4249	95.2121	93.8685	97.7445	92.7022	95.6223
573	98	96.724	97.5939	95.3773	95.1042	95.2604	94.4131	95.1717	93.7531	97.7232	92.7144	95.6688
575	98	96.7049	97.5848	95.3785	95.0939	95.1865	94.4003	95.1257	93.6252	97.7026	92.7314	95.7154
577	97.9	96.6881	97.5775	95.3931	95.0828	95.1152	94.3829	95.0744	93.4971	97.6808	92.7509	95.7598
579	97.9	96.6729	97.569	95.4154	95.0685	95.0534	94.3584	95.019	93.3801	97.6553	92.7714	95.8009
580	97.8	96.6582	97.5566	95.4389	95.0491	95.0066	94.3256	94.9615	93.2832	97.624	92.7916	95.8381
582	97.8	96.6436	97.5378	95.4568	95.0241	94.9775	94.2846	94.9037	93.2115	97.5855	92.8109	95.8711
584	97.7	96.63	97.5113	95.4634	94.9941	94.9658	94.2371	94.8473	93.1656	97.5396	92.8287	95.9
586	97.7	96.6184	97.4765	95.4547	94.9609	94.9682	94.1858	94.7936	93.1417	97.4872	92.8436	95.9249
588	97.6	96.6092	97.4334	95.4288	94.927	94.9792	94.1344	94.743	93.1318	97.4304	92.8542	95.9458
590	97.6	96.6022	97.383	95.3865	94.895	94.9917	94.0859	94.6952	93.1252	97.3717	92.8586	95.9625
592	97.6	96.5969	97.3273	95.3309	94.867	94.9983	94.0426	94.6492	93.1103	97.3139	92.8561	95.975
594	97.5	96.5934	97.2693	95.2669	94.8445	94.9929	94.0052	94.6039	93.077	97.2597	92.8469	95.983
596	97.5	96.5923	97.2124	95.2002	94.8277	94.9713	93.9726	94.5581	93.0182	97.211	92.8326	95.9861
598	97.5	96.5945	97.1598	95.1368	94.8158	94.9321	93.9429	94.5113	92.9317	97.169	92.8147	95.9843
600	97.5	96.5993	97.1145	95.0818	94.8071	94.8766	93.9137	94.4634	92.8199	97.1342	92.795	95.9775
602	97.5	96.6055	97.0784	95.0387	94.7994	94.8089	93.8831	94.4154	92.6904	97.1067	92.775	95.9661
604	97.5	96.6112	97.0525	95.0091	94.7905	94.7346	93.8501	94.3683	92.5536	97.0857	92.7558	95.9501
606	97.5	96.615	97.0367	94.9926	94.779	94.6599	93.8148	94.3233	92.4223	97.0699	92.7386	95.9299
607	97.4	96.6171	97.0301	94.9872	94.7642	94.5907	93.7785	94.2818	92.3095	97.0577	92.7249	95.9055
609	97.4	96.6184	97.0313	94.9897	94.7467	94.5316	93.7443	94.2452	92.2269	97.0479	92.7161	95.8773
611	97.4	96.6204	97.0383	94.9965	94.7286	94.4856	93.716	94.2144	92.183	97.0398	92.7137	95.846
613	97.4	96.6236	97.0488	95.0042	94.7127	94.4532	93.6977	94.1902	92.1815	97.0332	92.7182	95.8125
615	97.4	96.6285	97.06	95.0104	94.7024	94.4327	93.6927	94.1722	92.2212	97.0284	92.7292	95.7782
617	97.4	96.6359	97.0695	95.0139	94.7007	94.421	93.7028	94.1599	92.2954	97.0259	92.7457	95.7447
619	97.3	96.6473	97.0755	95.0149	94.7097	94.4137	93.728	94.1523	92.3936	97.0261	92.7668	95.7134
621	97.3	96.6636	97.0766	95.0147	94.7302	94.4065	93.767	94.1486	92.5029	97.0294	92.792	95.6857
623	97.3	96.6849	97.0722	95.0155	94.7611	94.3955	93.8172	94.1479	92.6099	97.0356	92.8213	95.6625
625	97.3	96.7097	97.0623	95.0196	94.7998	94.3782	93.8759	94.1499	92.7023	97.0445	92.8548	95.644
627	97.3	96.7354	97.0475	95.0293	94.8426	94.3537	93.9408	94.1546	92.771	97.0556	92.8919	95.63
629	97.3	96.7593	97.0292	95.0456	94.885	94.3226	94.0102	94.1616	92.8106	97.068	92.9319	95.6195
631	97.4	96.7791	97.0089	95.068	94.9218	94.2867	94.0823	94.1701	92.8198	97.0804	92.9727	95.6108
633	97.4	96.7935	96.9883	95.0947	94.9488	94.248	94.1557	94.179	92.8026	97.0912	93.0124	95.6015
634	97.4	96.803	96.9695	95.123	94.9634	94.2093	94.23	94.1874	92.7672	97.0992	93.0499	95.5899
636	97.4	96.8086	96.9551	95.15	94.965	94.1732	94.3047	94.1943	92.7249	97.1041	93.0849	95.575
638	97.5	96.8114	96.9472	95.1727	94.9553	94.1419	94.3791	94.1982	92.6873	97.1061	93.1176	95.5566
640	97.5	96.8134	96.9477	95.1891	94.9377	94.1163	94.4515	94.1979	92.6651	97.1064	93.148	95.5353
642	97.6	96.8169	96.9575	95.198	94.9168	94.0966	94.5193	94.1924	92.6657	97.1067	93.1754	95.5121
644	97.6	96.8249	96.9769	95.1997	94.8979	94.0819	94.5796	94.1813	92.6925	97.1088	93.199	95.4882
646	97.7	96.8397	97.0051	95.1958	94.8859	94.0709	94.6291	94.165	92.7443	97.1151	93.2182	95.4647
648	97.7	96.8621	97.0404	95.1893	94.8849	94.062	94.6652	94.1446	92.8159	97.1275	93.2334	95.4416
650	97.8	96.8911	97.0804	95.1835	94.8969	94.0539	94.6867	94.1215	92.8989	97.1477	93.246	95.4188
652	97.9	96.9244	97.1222	95.1823	94.9227	94.0458	94.694	94.0978	92.9828	97.1766	93.2579	95.3957
654	97.9	96.9594	97.1629	95.1886	94.961	94.0379	94.689	94.0748	93.0572	97.2144	93.271	95.372
656	97.9	96.9928	97.1991	95.2038	95.0084	94.0299	94.6742	94.0528	93.1125	97.2593	93.2862	95.3468
658	98	97.0211	97.2267	95.2269	95.0594	94.0211	94.6525	94.0308	93.1423	97.3079	93.3032	95.3195
660	98	97.0433	97.2428	95.2562	95.1094	94.0114	94.6281	94.0085	93.1455	97.3566	93.3229	95.2905
661	98	97.0598	97.2466	95.2897	95.1549	94.0013	94.6062	93.9867	93.1265	97.4022	93.3476	95.2619
663	98	97.0719	97.2389	95.3252	95.194	93.9915	94.5921	93.9665	93.0943	97.4417	93.3803	95.2367
665	98.1	97.0814	97.2216	95.3602	95.2263	93.9823	94.5901	93.9499	93.06	97.4728	93.4239	95.2179
667	98.1	97.0908	97.1976	95.3924	95.2529	93.9733	94.6035	93.9395	93.0357	97.4939	93.4803	95.2083
669	98.1	97.103	97.1703	95.4204	95.2762	93.9643	94.6349	93.9387	93.0327	97.5047	93.5495	95.2099
671	98.1	97.1205	97.1436	95.4436	95.2996	93.9545	94.6853	93.951	93.0592	97.506	93.6301	95.223
673	98.1	97.1447	97.1209	95.4627	95.327	93.9438	94.7551	93.9793	93.1198	97.4996	93.7197	95.2469
675	98.1	97.1757	97.1051	95.4794	95.362	93.9324	94.8433	94.0252	93.2147	97.4888	93.8155	95.2798
677	98.1	97.2124	97.0987	95.4959	95.4073	93.9216	94.9476	94.0887	93.3391	97.477	93.915	95.319
679	98.2	97.253	97.1029	95.5146	95.4644	93.9129	95.0647	94.1674	93.4849	97.4679	94.0154	95.3617
681	98.2	97.2953	97.1177	95.5368	95.5332	93.9081	95.1896	94.2565	93.6407	97.4643	94.1136	95.4051
683	98.2	97.3366	97.141	95.5627	95.611	93.908	95.316	94.3491	93.7942	97.4678	94.2056	95.4461
685	98.2	97.3752	97.1695	95.5915	95.6943	93.913	95.438	94.4386	93.9343	97.4789	94.2881	95.4824
687	98.2	97.4116	97.2006	95.6227	95.78	93.9242	95.5509	94.5202	94.0539	97.498	94.3602	95.5135
688	98.3	97.4467	97.2322	95.6558	95.8653	93.9422	95.6517	94.5912	94.1496	97.525	94.4234	95.5396
690	98.3	97.4811	97.2621	95.6891	95.947	93.9661	95.7387	94.6507	94.2214	97.5583	94.4805	95.5618
692	98.3	97.5152	97.2878	95.7211	96.0224	93.9942	95.8113	94.6996	94.2727	97.5956	94.535	95.5809
694	98.4	97.5499	97.3075	95.75	96.0897	94.0235	95.8709	94.7408	94.3096	97.6341	94.5897	95.598
696	98.4	97.5858	97.3198	95.7749	96.1481	94.0511	95.9205	94.778	94.3396	97.671	94.6459	95.6141
698	98.4	97.6232	97.3238	95.7955	96.1977	94.074	95.9637	94.8149	94.3708	97.7039	94.7025	95.6302
700	98.5	97.6613	97.3196	95.8126	96.2395	94.09	96.0046	94.8542	94.41	97.7313	94.7574	95.6471
702	98.5	97.6991	97.3078	95.8277	96.2751	94.0983	96.0471	94.8972	94.4625	97.7526	94.8075	95.6657
704	98.5	97.7352	97.2899	95.8424	96.3065	94.0994	96.0937	94.9434	94.5308	97.7683	94.8501	95.6865
706	98.6	97.7686	97.2679	95.8588	96.3359	94.0947	96.1459	94.9913	94.6154	97.7794	94.8827	95.7103
708	98.6	97.7988	97.2438	95.8783	96.3651	94.0867	96.2036	95.038	94.7143	97.7875	94.9033	95.7369
710	98.6	97.826	97.2199	95.9016	96.3955	94.0781	96.2656	95.0813	94.8248	97.7945	94.9105	95.7665
712	98.6	97.8514	97.1986	95.9288	96.4285	94.0721	96.3306	95.1202	94.9435	97.8027	94.9053	95.7989
714	98.7	97.8766	97.1828	95.9597	96.4653	94.0717	96.3975	95.1552	95.0677	97.8143	94.8913	95.8344
715	98.7	97.9028	97.1746	95.9929	96.5062	94.0788	96.4651	95.188	95.1946	97.8308	94.8752	95.8727
717	98.7	97.9308	97.1753	96.0262	96.5512	94.0937	96.5331	95.221	95.3217	97.8525	94.8658	95.9135
719	98.8	97.9615	97.1852	96.0571	96.5999	94.1152	96.6012	95.2568	95.4472	97.8784	94.8726	95.9562
721	98.8	97.9958	97.2033	96.0833	96.6514	94.141	96.6701	95.2976	95.5697	97.907	94.9042	96.0003
723	98.8	98.0341	97.228	96.1033	96.7049	94.168	96.7404	95.3445	95.6882	97.936	94.9666	96.0454
725	98.9	98.076	97.2567	96.1166	96.7594	94.1929	96.8126	95.3975	95.8019	97.9631	95.0623	96.091
727	98.9	98.1201	97.2863	96.1238	96.8137	94.2128	96.8866	95.4548	95.9095	97.986	95.1906	96.1368
729	98.9	98.1647	97.3137	96.1265	96.8671	94.2256	96.9616	95.514	96.01	98.0029	95.3483	96.1825
731	99	98.2082	97.3359	96.1276	96.9188	94.2303	97.0356	95.5719	96.1021	98.0127	95.5306	96.2277
733	99	98.2492	97.3504	96.1299	96.9682	94.2269	97.1059	95.6258	96.1851	98.0152	95.7312	96.272
735	99	98.2872	97.3555	96.1364	97.0148	94.2166	97.1694	95.6736	96.2588	98.0109	95.9432	96.3149
737	99	98.3217	97.3508	96.1497	97.0582	94.2013	97.2232	95.7144	96.3239	98.0016	96.1591	96.3557
739	99	98.3528	97.3366	96.1708	97.0983	94.1836	97.265	95.7484	96.3816	97.9897	96.3722	96.394
741	99.1	98.38	97.3141	96.1999	97.135	94.1655	97.2935	95.7766	96.4333	97.9778	96.5771	96.4288
742	99.1	98.4032	97.2854	96.2352	97.1683	94.1486	97.3086	95.8001	96.4798	97.9685	96.7703	96.4593
744	99.1	98.4225	97.2528	96.2738	97.1988	94.1335	97.312	95.8203	96.5222	97.9637	96.9504	96.485
746	99	98.4387	97.2188	96.312	97.2268	94.1198	97.3064	95.8378	96.5611	97.9648	97.1177	96.5056
748	99	98.4528	97.1857	96.346	97.2532	94.1066	97.2955	95.8531	96.5969	97.9724	97.2731	96.5212
750	99	98.4654	97.1555	96.3722	97.279	94.0923	97.2836	95.8662	96.6297	97.9862	97.4174	96.5326
752	99	98.4764	97.1298	96.3882	97.3051	94.0757	97.2747	95.8765	96.6595	98.0053	97.5504	96.5411
754	99	98.4856	97.1094	96.3934	97.3325	94.0558	97.2722	95.8839	96.6861	98.0281	97.6715	96.5482
756	98.9	98.4923	97.0946	96.3884	97.3618	94.0322	97.2788	95.8886	96.7098	98.0527	97.7802	96.5556
758	98.9	98.4966	97.0852	96.3757	97.3932	94.0053	97.2955	95.8911	96.7314	98.0774	97.8765	96.5647
760	98.9	98.4989	97.0804	96.3588	97.4265	93.9766	97.3222	95.8928	96.7528	98.1004	97.9613	96.5765
762	98.9	98.4998	97.0791	96.3416	97.4608	93.9478	97.358	95.8956	96.7763	98.1203	98.0359	96.5913
764	98.9	98.4999	97.0801	96.328	97.4947	93.9211	97.4012	95.9013	96.8048	98.1364	98.1017	96.6091
766	98.9	98.4993	97.0817	96.3209	97.5267	93.8983	97.4499	95.9119	96.8411	98.1485	98.1597	96.6295
768	98.9	98.4982	97.0827	96.3217	97.5547	93.8806	97.5023	95.9285	96.8876	98.1565	98.2104	96.6517
769	98.9	98.4975	97.0818	96.3301	97.5772	93.8684	97.5569	95.9518	96.9461	98.161	98.2545	96.6745
771	98.9	98.4983	97.0782	96.3441	97.5929	93.8608	97.6127	95.9814	97.0176	98.1621	98.2931	96.6975
773	98.9	98.5023	97.0714	96.3605	97.6013	93.8565	97.669	96.0162	97.1022	98.1603	98.3281	96.7204
775	99	98.5104	97.0614	96.3755	97.6031	93.8533	97.7253	96.0546	97.199	98.1558	98.3612	96.7435
777	99	98.5232	97.0483	96.3854	97.5994	93.8493	97.781	96.0947	97.3057	98.1487	98.3936	96.7674
779	99.1	98.5405	97.0327	96.3873	97.5926	93.8427	97.8355	96.1344	97.4192	98.1392	98.4251	96.793
781	99.1	98.5619	97.0152	96.3798	97.5853	93.8326	97.8876	96.1721	97.5352	98.1274	98.4546	96.8206
783	99.1	98.5872	96.9968	96.3632	97.5802	93.8191	97.9361	96.2066	97.6491	98.1139	98.4801	96.8504
785	99.2	98.616	96.9784	96.3397	97.5799	93.8029	97.9795	96.2373	97.7559	98.0993	98.4997	96.8819
787	99.2	98.6476	96.9606	96.3128	97.5861	93.7855	98.0164	96.264	97.8511	98.0846	98.5121	96.914
789	99.2	98.6811	96.9441	96.287	97.5997	93.7688	98.046	96.2871	97.9307	98.0713	98.5162	96.9452
791	99.2	98.7149	96.9291	96.2671	97.6206	93.7547	98.0682	96.3071	97.992	98.061	98.5111	96.9738
793	99.3	98.7475	96.916	96.2572	97.6475	93.7445	98.0839	96.3248	98.0333	98.0554	98.4955	96.9984
795	99.3	98.778	96.9049	96.2599	97.678	93.7387	98.0943	96.3405	98.055	98.0562	98.4685	97.0178
796	99.3	98.8061	96.8956	96.2765	97.7094	93.7368	98.1015	96.3545	98.0589	98.0645	98.4299	97.0314
798	99.3	98.8316	96.8882	96.3059	97.7386	93.7375	98.1072	96.3665	98.0486	98.0806	98.3817	97.0397
800	99.3	98.8544	96.8824	96.3457	97.7628	93.7389	98.1127	96.3764	98.0288	98.104	98.3274	97.0439
802	99.3	98.8744	96.8779	96.3917	97.7803	93.7392	98.1185	96.3837	98.0053	98.1334	98.272	97.0456
804	99.3	98.8914	96.8743	96.4389	97.79	93.7368	98.1244	96.3885	97.9832	98.1668	98.2212	97.047
806	99.3	98.9057	96.8714	96.4821	97.7924	93.731	98.1296	96.3909	97.9672	98.2016	98.1799	97.0503
808	99.3	98.9183	96.8689	96.517	97.7889	93.7222	98.133	96.3919	97.9601	98.2349	98.1517	97.0571
810	99.3	98.93	96.8669	96.5401	97.7817	93.7117	98.1338	96.3924	97.9631	98.2636	98.1389	97.0689
812	99.3	98.9415	96.8653	96.5497	97.7738	93.7018	98.1315	96.3936	97.9757	98.2854	98.1425	97.0864
814	99.3	98.9529	96.8642	96.546	97.7681	93.6951	98.1271	96.3969	97.9956	98.2985	98.1623	97.1098
816	99.3	98.964	96.8639	96.5309	97.7669	93.6942	98.1221	96.4033	98.0201	98.3024	98.1968	97.1388
818	99.3	98.9748	96.8645	96.5078	97.7718	93.7013	98.1191	96.4133	98.0459	98.2974	98.2432	97.1727
820	99.2	98.9853	96.8661	96.4807	97.7832	93.7171	98.1213	96.427	98.0707	98.285	98.2969	97.2106
822	99.2	98.996	96.8686	96.454	97.8002	93.7409	98.1315	96.4435	98.0937	98.2674	98.352	97.2512
823	99.2	99.0069	96.8718	96.4316	97.821	93.7709	98.1519	96.462	98.1159	98.247	98.4026	97.2934
825	99.2	99.0176	96.8753	96.4165	97.8428	93.8037	98.1831	96.4816	98.1404	98.2264	98.4433	97.336
827	99.2	99.0276	96.8781	96.4103	97.8623	93.8351	98.2238	96.5016	98.1719	98.2076	98.4702	97.3777
829	99.2	99.0366	96.8795	96.413	97.8765	93.8609	98.2715	96.5218	98.2155	98.1923	98.4815	97.4172
831	99.2	99.045	96.8782	96.4236	97.8829	93.8773	98.3224	96.5426	98.2757	98.1813	98.4768	97.453
833	99.2	99.0533	96.8733	96.4395	97.8803	93.8817	98.3724	96.5645	98.3549	98.1747	98.4565	97.484
835	99.3	99.062	96.8641	96.458	97.8682	93.8731	98.4178	96.5883	98.4529	98.1716	98.4217	97.5092
837	99.3	99.0713	96.85	96.4759	97.8478	93.8521	98.4558	96.614	98.5667	98.1709	98.3741	97.5281
839	99.4	99.0806	96.8307	96.491	97.8212	93.8211	98.4847	96.6413	98.6903	98.1714	98.3159	97.5404
841	99.4	99.0892	96.8064	96.5016	97.7913	93.7841	98.5038	96.6691	98.8158	98.172	98.2501	97.5463
843	99.5	99.0969	96.778	96.5071	97.7614	93.7453	98.5138	96.6957	98.9341	98.172	98.1804	97.5462
845	99.5	99.1038	96.7463	96.508	97.735	93.709	98.5157	96.7189	99.0368	98.1714	98.1105	97.5405
847	99.5	99.11	96.7128	96.5056	97.7147	93.6787	98.5106	96.7363	99.1168	98.1707	98.0435	97.5299
849	99.6	99.1154	96.6788	96.5016	97.7024	93.6565	98.4996	96.7463	99.17	98.1705	97.9819	97.5146
850	99.6	99.1193	96.6457	96.4976	97.6987	93.6424	98.4828	96.7479	99.1957	98.1719	97.9273	97.4948
852	99.6	99.1209	96.615	96.4951	97.7028	93.6349	98.4594	96.7411	99.1965	98.1755	97.8804	97.4704
854	99.5	99.1196	96.5876	96.4943	97.7126	93.6304	98.4284	96.7269	99.1776	98.1818	97.8421	97.4411
856	99.5	99.1157	96.5641	96.495	97.7248	93.6245	98.3887	96.7066	99.1456	98.1904	97.8125	97.4063
858	99.5	99.1095	96.5447	96.4957	97.7356	93.6127	98.3395	96.6817	99.1072	98.2002	97.7912	97.3659
860	99.5	99.1014	96.529	96.4943	97.7405	93.591	98.2809	96.6528	99.0677	98.2093	97.7764	97.32
862	99.4	99.0912	96.516	96.4882	97.7348	93.5568	98.2136	96.62	99.0306	98.2151	97.7648	97.269
864	99.4	99.0783	96.5044	96.4751	97.7146	93.5096	98.1387	96.5824	98.9966	98.2149	97.7516	97.2137
866	99.4	99.0624	96.4926	96.453	97.6763	93.4513	98.0576	96.5383	98.9632	98.2061	97.7308	97.155
868	99.3	99.0439	96.4791	96.4208	97.6175	93.3854	97.9711	96.486	98.9258	98.1867	97.6961	97.0936
870	99.3	99.0238	96.4626	96.3783	97.5372	93.3168	97.8798	96.4236	98.8777	98.1558	97.6408	97.0303
872	99.3	99.0034	96.4418	96.3264	97.4353	93.2511	97.7836	96.3503	98.8117	98.1136	97.5588	96.9658
874	99.2	98.9836	96.4162	96.267	97.3132	93.1933	97.6818	96.2661	98.7215	98.0616	97.4445	96.9005
876	99.2	98.965	96.3855	96.2025	97.1733	93.1471	97.5736	96.1723	98.6025	98.0029	97.2935	96.8347
877	99.1	98.9476	96.3503	96.1358	97.0188	93.1142	97.4583	96.0711	98.4531	97.9411	97.1037	96.7687
879	99.1	98.932	96.3114	96.0694	96.8539	93.0939	97.3362	95.9654	98.2758	97.8808	96.8754	96.703
881	99.1	98.9188	96.2704	96.0055	96.6833	93.0833	97.2088	95.8583	98.0765	97.8265	96.6128	96.6385
883	99	98.909	96.229	95.9458	96.5121	93.078	97.0792	95.7528	97.8648	97.7822	96.3237	96.5763
885	99	98.9029	96.189	95.8911	96.3457	93.0729	96.9515	95.6515	97.653	97.7508	96.0191	96.5178
887	99	98.9002	96.1525	95.8418	96.1894	93.0628	96.8307	95.5568	97.4545	97.7339	95.7124	96.4647
889	99	98.9002	96.121	95.7976	96.0479	93.0439	96.7218	95.4707	97.2823	97.7314	95.4177	96.4187
891	99	98.9022	96.0961	95.7583	95.9258	93.014	96.6287	95.3955	97.1475	97.7418	95.1489	96.3812
893	98.9	98.9059	96.0786	95.7237	95.8263	92.973	96.5543	95.3333	97.0573	97.7622	94.918	96.3529
895	98.9	98.9114	96.0687	95.6943	95.752	92.9229	96.4993	95.2861	97.0144	97.7887	94.7343	96.3343
897	98.9	98.9186	96.066	95.6705	95.7037	92.8675	96.4627	95.2557	97.0165	97.8167	94.6032	96.325
899	98.9	98.927	96.0693	95.6534	95.6809	92.8113	96.4416	95.2428	97.0561	97.8421	94.5257	96.324
901	98.8	98.9358	96.0769	95.6442	95.6815	92.7591	96.4323	95.2471	97.122	97.8611	94.4981	96.3298
903	98.8	98.9438	96.0863	95.6439	95.7017	92.7147	96.4303	95.2662	97.2007	97.8712	94.5121	96.3406
904	98.7	98.9503	96.0951	95.6527	95.7366	92.6804	96.4309	95.2963	97.2782	97.8711	94.556	96.3538
906	98.7	98.9546	96.1004	95.6702	95.7806	92.6567	96.4305	95.332	97.3418	97.8608	94.6159	96.3673
908	98.6	98.9567	96.0999	95.6949	95.8272	92.6422	96.4258	95.3668	97.3821	97.842	94.6777	96.3786
910	98.6	98.9564	96.0914	95.7237	95.8703	92.6339	96.4149	95.3946	97.3939	97.817	94.7283	96.3859
912	98.5	98.9532	96.0738	95.7529	95.9046	92.6278	96.3965	95.4101	97.3764	97.7886	94.7567	96.3873
914	98.5	98.9469	96.0465	95.778	95.9255	92.6195	96.3698	95.4099	97.3329	97.7598	94.7546	96.3818
916	98.4	98.9372	96.01	95.7945	95.9303	92.605	96.3348	95.3929	97.2695	97.7333	94.7164	96.3686
918	98.4	98.9244	95.9656	95.7986	95.9176	92.5816	96.2912	95.3601	97.1933	97.7109	94.6388	96.3474
920	98.4	98.9089	95.915	95.7877	95.8874	92.5479	96.2391	95.3142	97.1105	97.6933	94.5202	96.318
922	98.4	98.891	95.8606	95.7609	95.8413	92.5043	96.1786	95.2582	97.0252	97.6803	94.3605	96.2807
924	98.4	98.8704	95.8047	95.7191	95.7816	92.4527	96.1099	95.1948	96.9379	97.6705	94.1601	96.2357
926	98.4	98.8463	95.7498	95.665	95.7114	92.3959	96.0333	95.1254	96.845	97.6622	93.9192	96.1834
928	98.4	98.8179	95.698	95.6026	95.6337	92.3372	95.9491	95.0498	96.7396	97.6533	93.6379	96.1239
930	98.4	98.7841	95.6509	95.5369	95.5511	92.2799	95.8577	94.966	96.6122	97.6416	93.3154	96.0573
931	98.4	98.744	95.6092	95.4727	95.4659	92.2262	95.7591	94.8711	96.4526	97.6257	92.9512	95.9837
933	98.5	98.6967	95.5733	95.4142	95.379	92.1772	95.6531	94.7617	96.2515	97.6046	92.5454	95.9034
935	98.5	98.6418	95.5424	95.3639	95.2909	92.1329	95.539	94.6352	96.0027	97.5783	92.0998	95.8169
937	98.5	98.5787	95.5153	95.3226	95.201	92.0919	95.4158	94.4909	95.7043	97.5476	91.6184	95.7249
939	98.4	98.5072	95.4904	95.2887	95.1082	92.0519	95.282	94.3299	95.3597	97.5137	91.1075	95.6284
941	98.4	98.4275	95.4657	95.2587	95.0109	92.0103	95.1367	94.1555	94.9777	97.4785	90.5753	95.5285
943	98.3	98.3406	95.4393	95.2274	94.9075	91.9647	94.9789	93.9728	94.5716	97.4436	90.0311	95.4265
945	98.2	98.248	95.409	95.1887	94.7962	91.9135	94.8084	93.7877	94.1581	97.4104	89.4845	95.3233
947	98.1	98.1515	95.3733	95.1364	94.6754	91.8562	94.6257	93.6057	93.755	97.3795	88.945	95.2198
949	98	98.0531	95.3309	95.0648	94.544	91.7935	94.4324	93.4317	93.3797	97.3509	88.421	95.1167
951	97.9	97.9546	95.2813	94.9695	94.4012	91.7275	94.2305	93.2691	93.0464	97.3237	87.9197	95.0142
953	97.7	97.8577	95.2246	94.8479	94.2467	91.6608	94.0227	93.1196	92.7652	97.2964	87.446	94.9125
955	97.6	97.764	95.1613	94.6993	94.0806	91.5965	93.8116	92.9838	92.5405	97.2667	87.0023	94.8111
957	97.4	97.6747	95.0929	94.5253	93.903	91.5371	93.5991	92.8609	92.3706	97.2325	86.5883	94.7097
958	97.3	97.5905	95.0208	94.3292	93.7138	91.4844	93.3865	92.7492	92.2484	97.1916	86.2011	94.6075
960	97.2	97.5119	94.9469	94.1155	93.5127	91.4387	93.1733	92.6465	92.1611	97.1426	85.8357	94.5035
962	97.1	97.4387	94.8731	93.8894	93.2986	91.3989	92.9577	92.5494	92.0927	97.085	85.4864	94.3966
964	97	97.3702	94.801	93.656	93.0696	91.3624	92.7363	92.4542	92.0248	97.0192	85.147	94.2854
966	96.9	97.3053	94.7321	93.4197	92.8228	91.3259	92.5043	92.3561	91.9391	96.9467	84.8117	94.1679
968	96.8	97.2428	94.6676	93.184	92.5548	91.2853	92.2562	92.2498	91.8194	96.8698	84.4754	94.0422
970	96.8	97.1814	94.6079	92.9512	92.2615	91.2368	91.9859	92.1295	91.6532	96.7916	84.134	93.9063
972	96.8	97.1199	94.5531	92.7219	91.9394	91.1774	91.688	91.9893	91.4325	96.7151	83.7845	93.7585
974	96.7	97.0574	94.5027	92.4959	91.5857	91.1053	91.3577	91.8247	91.1548	96.6432	83.4257	93.5974
976	96.7	96.993	94.4558	92.2721	91.1996	91.0204	90.9924	91.6329	90.8225	96.5782	83.0585	93.4226
978	96.7	96.9257	94.4108	92.049	90.7829	90.924	90.5914	91.4141	90.4418	96.5214	82.6858	93.2344
980	96.7	96.8547	94.3661	91.8252	90.3408	90.8189	90.1568	91.1713	90.022	96.4728	82.3123	93.0339
982	96.6	96.7792	94.3199	91.6	89.8812	90.7084	89.6933	90.9105	89.5732	96.4315	81.9436	92.8233
984	96.6	96.6981	94.2703	91.3731	89.4149	90.5961	89.2075	90.6395	89.1054	96.3955	81.5853	92.6051
985	96.6	96.6109	94.2158	91.1454	88.9544	90.4849	88.7074	90.367	88.6262	96.3623	81.2425	92.382
987	96.5	96.5171	94.1547	90.9183	88.5123	90.3772	88.2013	90.101	88.1408	96.3291	80.9186	92.1565
989	96.5	96.4162	94.0861	90.6934	88.1	90.274	87.6966	89.8475	87.6513	96.2935	80.6161	91.9306
991	96.4	96.3077	94.0093	90.4725	87.7259	90.175	87.199	89.6101	87.1576	96.2534	80.3361	91.7058
993	96.3	96.1915	93.9245	90.2566	87.3945	90.0793	86.7117	89.3891	86.6582	96.2076	80.0783	91.483
995	96.2	96.0677	93.8321	90.0459	87.1054	89.985	86.2354	89.1826	86.1517	96.1558	79.8411	91.2624
997	96	95.9372	93.7332	89.8394	86.8535	89.8904	85.7686	88.9868	85.638	96.0986	79.6215	91.0442
999	95.9	95.8014	93.6295	89.635	86.6295	89.7942	85.3079	88.7974	85.1194	96.0374	79.4151	90.8284
1000	95.7	95.6621	93.5226	89.4293	86.4211	89.6958	84.8492	88.6108	84.6007	95.974	79.2171	90.615
1000	95.5	95.5213	93.4145	89.2181	86.2151	89.5961	84.3894	88.4245	84.0895	95.9106	79.0226	90.4046
1000	95.3	95.3811	93.3073	88.9968	85.9991	89.4966	83.9264	88.2383	83.5949	95.8488	78.8277	90.1979
1010	95.1	95.2432	93.2026	88.7608	85.7632	89.4	83.4605	88.0533	83.1273	95.79	78.6297	89.9961
1010	95	95.1091	93.1019	88.5061	85.5013	89.3094	82.9944	87.8718	82.6958	95.7348	78.4269	89.8003
1010	94.8	94.9805	93.0063	88.2296	85.2119	89.2277	82.5328	87.6966	82.3082	95.683	78.2185	89.6115
1010	94.7	94.8585	92.9162	87.9296	84.898	89.157	82.0819	87.5301	81.9688	95.6336	78.0039	89.43
1010	94.6	94.7444	92.8315	87.6059	84.5665	89.0985	81.6485	87.3738	81.6786	95.5854	77.7834	89.2561
1020	94.5	94.6382	92.7519	87.2603	84.2267	89.0517	81.2391	87.2282	81.4355	95.5365	77.5576	89.0891
1020	94.4	94.5399	92.6763	86.896	83.8895	89.015	80.8591	87.0932	81.2344	95.4854	77.3281	88.9284
1020	94.4	94.4486	92.6035	86.5183	83.5654	88.9856	80.5122	86.9681	81.0683	95.4307	77.0975	88.7734
1020	94.3	94.3635	92.5321	86.1336	83.2633	88.9599	80.2003	86.8523	80.9297	95.3717	76.8691	88.6238
1020	94.3	94.2837	92.4609	85.7495	82.9903	88.9341	79.924	86.7458	80.8112	95.3086	76.6465	88.4798
1030	94.4	94.2083	92.3887	85.3744	82.7506	88.9049	79.6823	86.649	80.7064	95.2425	76.4333	88.3422
1030	94.4	94.1365	92.3145	85.0167	82.546	88.8699	79.4737	86.5627	80.6102	95.1754	76.2327	88.2121
1030	94.4	94.0673	92.2378	84.6847	82.3756	88.828	79.2957	86.4872	80.5194	95.1099	76.0474	88.0911
1030	94.4	93.9999	92.1581	84.3856	82.237	88.7796	79.1451	86.4226	80.4316	95.0487	75.8798	87.9803
1030	94.5	93.934	92.0756	84.1253	82.1261	88.7263	79.0179	86.3676	80.3458	94.9943	75.7321	87.8802
1040	94.5	93.8698	91.9908	83.9077	82.0376	88.6709	78.9093	86.3198	80.2612	94.9485	75.6056	87.7904
1040	94.5	93.808	91.9044	83.7348	81.9658	88.6163	78.8137	86.2755	80.1771	94.9126	75.5006	87.7094
1040	94.5	93.7501	91.8174	83.606	81.905	88.5654	78.7255	86.2306	80.093	94.8867	75.4164	87.6346
1040	94.5	93.6973	91.731	83.5188	81.8493	88.5203	78.6388	86.1811	80.0081	94.87	75.3508	87.5632
1040	94.5	93.6507	91.6464	83.4687	81.7931	88.4823	78.5488	86.1242	79.9216	94.8606	75.3008	87.4924
1050	94.4	93.6111	91.5651	83.4494	81.7318	88.4515	78.4523	86.0585	79.8331	94.8565	75.2633	87.4204
1050	94.4	93.5784	91.4884	83.4535	81.6611	88.4269	78.3481	85.9847	79.7423	94.855	75.2353	87.3464
1050	94.4	93.5523	91.4175	83.4728	81.578	88.4069	78.2378	85.9056	79.6491	94.8537	75.2147	87.2715
1050	94.4	93.532	91.3537	83.4994	81.4809	88.3891	78.1258	85.8253	79.5542	94.8508	75.1997	87.198
1050	94.4	93.5161	91.2974	83.5255	81.3698	88.3714	78.0191	85.7493	79.4589	94.8452	75.1893	87.1294
1050	94.3	93.5026	91.2493	83.5447	81.2461	88.352	77.9265	85.6831	79.365	94.8364	75.1825	87.0698
1060	94.3	93.4896	91.2091	83.5519	81.113	88.3298	77.8574	85.6318	79.2755	94.8247	75.1785	87.0227
1060	94.3	93.475	91.1764	83.5442	80.975	88.3048	77.8204	85.5996	79.1935	94.8112	75.1768	86.9912
1060	94.3	93.4575	91.1503	83.5205	80.8374	88.2775	77.8223	85.5891	79.1231	94.7968	75.1773	86.9768
1060	94.3	93.4367	91.1295	83.4822	80.7065	88.2492	77.8673	85.6014	79.0682	94.7831	75.1801	86.9798
1060	94.3	93.4129	91.1124	83.4328	80.5883	88.2215	77.9564	85.6361	79.0331	94.771	75.1856	86.999
1070	94.3	93.3877	91.0971	83.3777	80.489	88.196	78.088	85.6916	79.0215	94.7614	75.1941	87.0326
1070	94.2	93.3627	91.082	83.3237	80.4138	88.1739	78.2579	85.7655	79.0362	94.7549	75.2052	87.078
1070	94.2	93.3401	91.0657	83.2786	80.3668	88.1559	78.46	85.8547	79.0785	94.7514	75.2184	87.1328
1070	94.2	93.3219	91.0473	83.2501	80.3507	88.1423	78.6869	85.9554	79.1475	94.7508	75.2329	87.1949
1070	94.1	93.3099	91.0265	83.2456	80.3667	88.1327	78.9304	86.0637	79.2399	94.7526	75.2482	87.2623
1080	94.1	93.3057	91.0034	83.271	80.4144	88.1263	79.182	86.1753	79.3502	94.7565	75.2644	87.3336
1080	94.1	93.3105	90.9788	83.3305	80.4919	88.1224	79.4339	86.2863	79.4708	94.7621	75.2817	87.4072
1080	94.1	93.325	90.9544	83.4262	80.5964	88.1204	79.6784	86.3927	79.593	94.7697	75.3007	87.482
1080	94	93.349	90.932	83.5576	80.7239	88.12	79.9089	86.4913	79.7082	94.7794	75.3216	87.5567
1080	94	93.382	90.914	83.7223	80.8701	88.1214	80.1188	86.5791	79.8088	94.792	75.3446	87.6299
1090	94	93.4229	90.9029	83.9161	81.0303	88.1254	80.3027	86.6537	79.8893	94.8086	75.3698	87.7002
1090	94	93.4707	90.9012	84.1333	81.2001	88.1327	80.4558	86.7131	79.947	94.8301	75.3976	87.7665
1090	94	93.5243	90.9107	84.3678	81.3751	88.1444	80.5751	86.7561	79.9831	94.8574	75.4285	87.8279
1090	94	93.5832	90.9328	84.6133	81.5517	88.1613	80.6595	86.7821	80.0019	94.8912	75.4633	87.8841
1090	93.9	93.6467	90.9681	84.8644	81.7271	88.1837	80.7111	86.792	80.0113	94.9316	75.503	87.9354
1100	93.9	93.7145	91.0165	85.1167	81.8988	88.2115	80.735	86.7876	80.0217	94.9781	75.5482	87.9827
1100	93.9	93.7861	91.0767	85.3671	82.0653	88.244	80.7395	86.7724	80.0444	95.0298	75.5994	88.0274
1100	93.9	93.8611	91.1469	85.6139	82.2255	88.2799	80.7355	86.7511	80.0909	95.0851	75.6566	88.0711
1100	93.8	93.9393	91.2242	85.8564	82.379	88.3179	80.7357	86.73	80.1718	95.1419	75.7205	88.1159
1100	93.8	94.0206	91.3053	86.0944	82.526	88.3565	80.7536	86.7165	80.2953	95.1978	75.7922	88.1639
1110	93.8	94.1051	91.3864	86.3279	82.6673	88.3949	80.8021	86.7182	80.4671	95.2508	75.8734	88.2174
1110	93.9	94.1927	91.4641	86.5568	82.8045	88.4327	80.8925	86.7423	80.6896	95.2991	75.9663	88.2784
1110	93.9	94.2831	91.5352	86.7801	82.9398	88.4704	81.0327	86.7944	80.9622	95.3414	76.0733	88.3492
1110	94	94.3754	91.5972	86.9964	83.0759	88.5089	81.2272	86.8779	81.2806	95.3774	76.1969	88.4313
1110	94	94.4685	91.6486	87.2031	83.2163	88.5497	81.4766	86.9932	81.6382	95.4077	76.3389	88.5263
1110	94.1	94.5613	91.6889	87.3975	83.3647	88.5943	81.7778	87.1379	82.0259	95.4333	76.501	88.6349
1120	94.3	94.6527	91.7186	87.5768	83.5253	88.644	82.1248	87.3071	82.4333	95.4561	76.6841	88.7574
1120	94.4	94.7417	91.7393	87.7385	83.7021	88.6994	82.5095	87.4944	82.8491	95.4779	76.8881	88.8931
1120	94.5	94.8273	91.7535	87.8812	83.8984	88.7604	82.9221	87.6927	83.2624	95.5011	77.1121	89.0403
1120	94.6	94.9081	91.7643	88.0046	84.1165	88.8256	83.3524	87.8953	83.6625	95.5273	77.3531	89.1963
1120	94.8	94.9829	91.7751	88.1102	84.3568	88.8925	83.7897	88.0966	84.0398	95.5578	77.6067	89.3575
1130	94.9	95.0507	91.7893	88.2004	84.6175	88.9579	84.2232	88.2928	84.3862	95.593	77.8671	89.5198
1130	95	95.1111	91.8096	88.279	84.894	89.0184	84.6421	88.481	84.6947	95.6323	78.1273	89.6783
1130	95	95.1642	91.8384	88.3503	85.1789	89.0708	85.0357	88.6591	84.9605	95.6744	78.3796	89.8283
1130	95.1	95.2109	91.8771	88.4189	85.4622	89.1128	85.3935	88.8246	85.18	95.7173	78.6165	89.9651
1130	95.1	95.2522	91.9259	88.4887	85.7318	89.1429	85.7052	88.9743	85.3511	95.7586	78.8305	90.0848
1140	95.1	95.289	91.9844	88.5629	85.9746	89.1615	85.9615	89.1035	85.4734	95.796	79.0148	90.184
1140	95.1	95.3226	92.0509	88.6436	86.1779	89.1702	86.1552	89.2067	85.548	95.8274	79.163	90.2606
1140	95.1	95.3545	92.1232	88.7315	86.3311	89.1718	86.2819	89.2779	85.578	95.8511	79.2697	90.3137
1140	95.1	95.3865	92.1984	88.8262	86.4273	89.1701	86.3409	89.3124	85.5681	95.8664	79.3312	90.3435
1140	95.1	95.4207	92.2732	88.9266	86.4646	89.1691	86.3361	89.3078	85.5254	95.8735	79.346	90.3518
1150	95.1	95.4592	92.3444	89.0312	86.447	89.1725	86.2758	89.265	85.459	95.8735	79.3152	90.3411
1150	95.1	95.5035	92.4094	89.1391	86.3844	89.1829	86.1729	89.1892	85.3798	95.8686	79.2429	90.3152
1150	95.1	95.5545	92.4659	89.2497	86.2915	89.2019	86.0438	89.0895	85.3008	95.8615	79.1359	90.2787
1150	95.1	95.6124	92.5126	89.3634	86.1867	89.2294	85.9075	88.9782	85.2357	95.8551	79.0036	90.237
1150	95.1	95.6776	92.5492	89.4817	86.0898	89.2641	85.7844	88.8691	85.1986	95.852	78.8577	90.1962
1160	95.2	95.7501	92.5765	89.6069	86.0203	89.3036	85.6949	88.7763	85.2033	95.8548	78.7109	90.1629
1160	95.3	95.83	92.5962	89.7419	85.995	89.3451	85.658	88.7119	85.2621	95.865	78.5772	90.1439
1160	95.4	95.9167	92.6107	89.8896	86.0267	89.3859	85.6901	88.6854	85.3851	95.8836	78.4706	90.1459
1160	95.5	96.0091	92.6233	90.0524	86.1233	89.4238	85.8038	88.7031	85.579	95.9105	78.4041	90.1749
1160	95.6	96.1061	92.6374	90.2319	86.2871	89.4582	86.0073	88.7681	85.8474	95.9449	78.3889	90.2359
1160	95.8	96.206	92.6565	90.428	86.5152	89.4894	86.3033	88.8805	86.1895	95.9852	78.4335	90.332
1170	95.9	96.3078	92.6836	90.6393	86.8007	89.5191	86.689	89.0384	86.6005	96.0294	78.5431	90.4643
1170	96.1	96.4108	92.7212	90.8626	87.133	89.5501	87.1559	89.2383	87.0717	96.0755	78.7196	90.6313
1170	96.2	96.5142	92.7707	91.0933	87.5	89.5855	87.6897	89.4757	87.591	96.1216	78.9615	90.8291
1170	96.3	96.6171	92.8326	91.3259	87.8882	89.6281	88.2717	89.7445	88.1436	96.1664	79.2646	91.0513
1170	96.5	96.7181	92.9062	91.5543	88.2847	89.6803	88.8792	90.0376	88.7124	96.2087	79.6219	91.2899
1180	96.6	96.8157	92.9897	91.7724	88.677	89.7428	89.4877	90.3462	89.2798	96.248	80.0243	91.5356
1180	96.7	96.9083	93.0805	91.9745	89.0539	89.8149	90.0723	90.6597	89.828	96.2842	80.4607	91.7791
1180	96.8	96.9948	93.1751	92.1558	89.4057	89.8942	90.6108	90.966	90.3403	96.3172	80.9185	92.0116
1180	96.8	97.074	93.2697	92.3129	89.7247	89.9768	91.0848	91.2526	90.8023	96.347	81.3842	92.2259
1180	96.9	97.145	93.3605	92.4436	90.0049	90.0582	91.4816	91.5077	91.2025	96.3738	81.8445	92.4163
1190	97	97.2065	93.4438	92.5473	90.243	90.1337	91.7953	91.7219	91.5333	96.3972	82.287	92.5798
1190	97	97.2571	93.5169	92.6245	90.4377	90.1991	92.0268	91.8899	91.7911	96.4167	82.701	92.7149
1190	97	97.2959	93.5779	92.6766	90.5909	90.2515	92.1831	92.011	91.9767	96.4313	83.0781	92.8224
1190	97	97.3226	93.6263	92.7058	90.7067	90.2898	92.2755	92.0899	92.0951	96.4401	83.4127	92.9043
1190	97	97.3379	93.6625	92.7144	90.7914	90.3147	92.3185	92.1352	92.1542	96.4421	83.7018	92.964
1200	97	97.3428	93.6882	92.7044	90.8534	90.3285	92.3267	92.158	92.1646	96.4365	83.9454	93.0052
1200	97	97.3384	93.7059	92.6772	90.9016	90.335	92.314	92.1703	92.1379	96.4228	84.1459	93.0318
1200	96.9	97.3257	93.7186	92.6334	90.9452	90.3387	92.2913	92.1823	92.0856	96.4013	84.308	93.0477
1200	96.9	97.3059	93.7295	92.5727	90.9923	90.3441	92.2661	92.201	92.018	96.3725	84.4376	93.0565
1200	96.8	97.2801	93.7417	92.4942	91.0493	90.3551	92.2425	92.2292	91.9428	96.3378	84.5408	93.0609
1210	96.8	97.2501	93.7576	92.3965	91.12	90.3743	92.2209	92.2656	91.8649	96.2988	84.6235	93.0628
1210	96.7	97.2173	93.779	92.278	91.2056	90.4026	92.1995	92.3053	91.7859	96.2576	84.6898	93.0633
1210	96.6	97.1831	93.8066	92.1378	91.3048	90.4395	92.1749	92.3418	91.705	96.2162	84.7424	93.0627
1210	96.5	97.1483	93.8401	91.9757	91.4143	90.4829	92.1435	92.3684	91.6188	96.1766	84.782	93.0603
1210	96.4	97.1131	93.8784	91.7926	91.5292	90.5299	92.1019	92.3798	91.5232	96.1403	84.808	93.0549
1210	96.3	97.0776	93.9197	91.5907	91.6441	90.5769	92.048	92.3733	91.4139	96.1079	84.8189	93.0451
1220	96.2	97.0423	93.962	91.3735	91.7537	90.6209	91.9807	92.3485	91.2878	96.0796	84.8126	93.0296
1220	96.1	97.0078	94.003	91.1456	91.8534	90.659	91.9008	92.3077	91.1437	96.0546	84.7871	93.0076
1220	96	96.9748	94.0407	90.912	91.94	90.6897	91.8098	92.2547	90.9831	96.0318	84.7411	92.9788
1220	95.9	96.9435	94.0734	90.6779	92.0117	90.7126	91.7107	92.1939	90.81	96.0094	84.6739	92.9442
1220	95.9	96.9139	94.1002	90.4481	92.0681	90.7284	91.6071	92.1293	90.6308	95.9858	84.5862	92.9051
1230	95.8	96.8862	94.1208	90.2271	92.1104	90.7388	91.503	92.0643	90.4536	95.9595	84.4803	92.8639
1230	95.8	96.8606	94.1356	90.0183	92.1407	90.746	91.4027	92.0013	90.2873	95.9296	84.3597	92.8229
1230	95.8	96.8376	94.1458	89.8248	92.1618	90.7527	91.3104	91.942	90.1401	95.8959	84.2292	92.7846
1230	95.8	96.8181	94.1531	89.6489	92.177	90.7609	91.23	91.8874	90.0193	95.8591	84.0944	92.751
1230	95.8	96.8024	94.1594	89.4924	92.1894	90.7724	91.1646	91.8387	89.9298	95.8205	83.9609	92.7237
1240	95.8	96.7904	94.1667	89.3569	92.2017	90.7882	91.1167	91.797	89.8738	95.7825	83.8348	92.7034
1240	95.8	96.7821	94.177	89.2441	92.2163	90.8085	91.0871	91.7637	89.8507	95.7474	83.7213	92.6905
1240	95.8	96.7771	94.1915	89.1557	92.2348	90.8329	91.0754	91.7399	89.857	95.7178	83.6251	92.6844
1240	95.9	96.7756	94.211	89.0935	92.2579	90.8604	91.0799	91.7259	89.8872	95.6959	83.5502	92.6846
1240	95.9	96.7776	94.2359	89.0593	92.2859	90.8898	91.0973	91.7216	89.9341	95.6834	83.4994	92.69
1250	95.9	96.7832	94.2655	89.0544	92.3181	90.92	91.1239	91.7257	89.9904	95.681	83.4745	92.7
1250	95.9	96.7916	94.2988	89.0798	92.3532	90.9499	91.1556	91.7363	90.0491	95.6887	83.4764	92.7139
1250	95.9	96.802	94.3342	89.1354	92.3896	90.9784	91.189	91.7512	90.1051	95.7055	83.5045	92.7312
1250	96	96.8137	94.3698	89.2207	92.4254	91.0051	91.2213	91.7684	90.1551	95.7297	83.5573	92.7518
1250	96	96.8264	94.4042	89.3338	92.459	91.0297	91.2515	91.7867	90.1986	95.759	83.6328	92.7756
1260	96	96.8403	94.4362	89.4724	92.4895	91.0522	91.2795	91.806	90.2375	95.7912	83.7285	92.8027
1260	96	96.8556	94.465	89.6332	92.5163	91.073	91.3067	91.8271	90.2755	95.824	83.8415	92.8331
1260	96	96.8722	94.4904	89.8124	92.54	91.0921	91.3348	91.8516	90.3171	95.8557	83.9692	92.8666
1260	96	96.8899	94.513	90.0059	92.5619	91.1098	91.3659	91.8809	90.3675	95.8849	84.1089	92.9032
1260	96	96.9087	94.5335	90.2095	92.5841	91.1265	91.4018	91.9165	90.4308	95.9113	84.2582	92.9427
1270	96	96.9283	94.553	90.4191	92.6094	91.1425	91.4436	91.9586	90.5097	95.935	84.4155	92.9845
1270	96	96.949	94.5731	90.631	92.641	91.1585	91.4917	92.0065	90.6046	95.9571	84.5793	93.0284
1270	96	96.9711	94.5949	90.8415	92.6815	91.1754	91.5459	92.0586	90.7138	95.9791	84.7488	93.0738
1270	96.1	96.9945	94.6194	91.0478	92.733	91.1943	91.6054	92.1125	90.8334	96.0024	84.9236	93.1201
1270	96.1	97.0185	94.6473	91.2469	92.7964	91.2164	91.6694	92.1659	90.958	96.0287	85.1035	93.1672
1270	96.1	97.0422	94.6785	91.4367	92.871	91.2426	91.737	92.2168	91.0811	96.059	85.2881	93.2145
1280	96.2	97.0648	94.7126	91.6152	92.9545	91.2738	91.8077	92.2637	91.1964	96.0937	85.4761	93.2617
1280	96.2	97.0858	94.7489	91.7807	93.0428	91.3103	91.881	92.3064	91.2983	96.1325	85.6657	93.3085
1280	96.2	97.1054	94.7863	91.9322	93.1309	91.3517	91.9562	92.3447	91.3822	96.1743	85.8538	93.3543
1280	96.3	97.1238	94.8236	92.069	93.2126	91.3969	92.0322	92.379	91.4457	96.2173	86.0369	93.3987
1280	96.3	97.1412	94.8594	92.191	93.2819	91.444	92.1071	92.4089	91.4877	96.2593	86.2103	93.4407
1290	96.3	97.1573	94.8922	92.2986	93.3333	91.4905	92.1779	92.4338	91.5089	96.2978	86.3693	93.4793
1290	96.3	97.1719	94.9209	92.3928	93.3624	91.5335	92.2411	92.4518	91.511	96.3304	86.5091	93.5133
1290	96.4	97.185	94.9443	92.4752	93.3669	91.5703	92.2925	92.4608	91.4966	96.3554	86.6253	93.5413
1290	96.4	97.1962	94.9618	92.5473	93.3464	91.599	92.3277	92.4581	91.468	96.3718	86.7147	93.5619
1290	96.4	97.2056	94.973	92.6111	93.3027	91.6185	92.343	92.4415	91.4273	96.3796	86.7751	93.5737
1300	96.4	97.2125	94.9779	92.6683	93.2393	91.6288	92.3355	92.4092	91.3756	96.3799	86.8061	93.5757
1300	96.4	97.2162	94.9771	92.7205	93.1615	91.6315	92.304	92.3609	91.3135	96.3743	86.809	93.5675
1300	96.4	97.2153	94.9715	92.7687	93.0752	91.6293	92.2494	92.2974	91.2405	96.3653	86.7866	93.5495
1300	96.4	97.2087	94.9621	92.8135	92.9864	91.6255	92.1738	92.2205	91.1558	96.3552	86.7429	93.5225
1300	96.4	97.1963	94.9504	92.8544	92.9004	91.6233	92.0812	92.1331	91.0582	96.3463	86.6824	93.4878
1310	96.4	97.1791	94.9382	92.8911	92.8216	91.6261	91.977	92.0384	90.9474	96.3405	86.6104	93.4476
1310	96.4	97.1589	94.9276	92.9231	92.7533	91.6362	91.867	91.9402	90.8239	96.3389	86.5327	93.4043
1310	96.4	97.1378	94.9207	92.9499	92.6974	91.6548	91.7575	91.842	90.6897	96.3422	86.455	93.3607
1310	96.4	97.1179	94.9192	92.9717	92.6547	91.6817	91.6544	91.7474	90.548	96.3502	86.3832	93.3194
1310	96.4	97.1007	94.9244	92.9891	92.6249	91.7152	91.5628	91.6594	90.4036	96.3619	86.3225	93.2827
1320	96.4	97.0874	94.9367	93.0031	92.6067	91.7522	91.4865	91.5809	90.2618	96.3761	86.2771	93.2523
1320	96.3	97.0786	94.9556	93.0153	92.5983	91.7888	91.428	91.5142	90.1286	96.3912	86.2499	93.2289
1320	96.3	97.0741	94.9798	93.0274	92.5972	91.821	91.3882	91.4611	90.0096	96.4056	86.2422	93.2127
1320	96.3	97.073	95.0073	93.0412	92.6013	91.8452	91.3669	91.4227	89.9097	96.4182	86.2538	93.2031
1320	96.3	97.0734	95.0356	93.0588	92.6088	91.8591	91.3629	91.3994	89.8328	96.4285	86.2828	93.1994
1320	96.3	97.0726	95.0619	93.081	92.6177	91.8618	91.3739	91.3908	89.7809	96.4362	86.3259	93.2004
1330	96.3	97.0677	95.0829	93.1077	92.6262	91.8536	91.3969	91.395	89.7539	96.4414	86.3783	93.2046
1330	96.3	97.0568	95.0957	93.1375	92.6321	91.8362	91.4284	91.4091	89.7496	96.4441	86.4339	93.2103
1330	96.3	97.0407	95.0992	93.1686	92.634	91.8127	91.4653	91.4301	89.7647	96.4449	86.4866	93.2164
1330	96.3	97.0218	95.0938	93.1995	92.6316	91.7879	91.5052	91.4555	89.7951	96.445	86.5312	93.2223
1330	96.3	97.003	95.0814	93.2283	92.6251	91.7666	91.5465	91.4831	89.8367	96.4457	86.5634	93.228
1340	96.3	96.9871	95.0646	93.253	92.6151	91.7532	91.5881	91.5118	89.885	96.4481	86.5806	93.2335
1340	96.3	96.9759	95.0461	93.2712	92.6018	91.7508	91.6288	91.5408	89.9355	96.4525	86.5816	93.239
1340	96.3	96.9709	95.0286	93.2806	92.5858	91.7606	91.6671	91.5702	89.9844	96.4587	86.5665	93.2441
1340	96.4	96.9724	95.0148	93.2788	92.5673	91.7818	91.7012	91.5997	90.0283	96.4658	86.5367	93.2485
1340	96.4	96.98	95.0064	93.2636	92.5465	91.8118	91.7285	91.6288	90.0649	96.4723	86.4943	93.2514
1350	96.4	96.992	95.0047	93.2332	92.5234	91.8469	91.746	91.6565	90.0923	96.4764	86.4418	93.2519
1350	96.4	97.0053	95.0097	93.1858	92.4983	91.883	91.7503	91.6806	90.1095	96.4765	86.3818	93.2491
1350	96.4	97.0151	95.0198	93.1192	92.4703	91.915	91.7373	91.6981	90.1156	96.4705	86.3159	93.2417
1350	96.4	97.0164	95.0316	93.0303	92.4376	91.9382	91.7028	91.7049	90.1089	96.4562	86.2448	93.2279
1350	96.4	97.0058	95.0421	92.9169	92.3984	91.9489	91.6437	91.697	90.0881	96.4323	86.1684	93.2059
1360	96.4	96.983	95.049	92.7789	92.3518	91.9458	91.5596	91.6721	90.0525	96.3984	86.0865	93.1746
1360	96.4	96.9493	95.051	92.6183	92.2979	91.9304	91.4527	91.6297	90.0021	96.356	85.9994	93.1342
1360	96.3	96.9071	95.0475	92.4395	92.2381	91.9059	91.3284	91.5721	89.9377	96.3076	85.9075	93.0857
1360	96.3	96.8585	95.0382	92.2484	92.1741	91.8765	91.1945	91.5036	89.8605	96.2564	85.8117	93.0307
1360	96.3	96.8059	95.0226	92.0518	92.108	91.8465	91.0601	91.4299	89.7719	96.2056	85.713	92.9714
1370	96.2	96.7524	95.0016	91.8587	92.0427	91.82	90.9356	91.3578	89.6743	96.1584	85.6138	92.9107
1370	96.2	96.7013	94.9767	91.6789	91.9825	91.8004	90.8316	91.2943	89.5712	96.118	85.5176	92.8525
1370	96.2	96.656	94.9502	91.523	91.9321	91.79	90.7573	91.2454	89.4665	96.0872	85.4292	92.8011
1370	96.2	96.6187	94.9246	91.4007	91.8967	91.7896	90.7203	91.2156	89.3649	96.0679	85.3536	92.761
1370	96.2	96.5897	94.9023	91.32	91.8815	91.7987	90.725	91.2073	89.2709	96.061	85.296	92.7364
1380	96.2	96.5671	94.8846	91.2855	91.8898	91.8151	90.772	91.2205	89.1879	96.0659	85.2602	92.73
1380	96.2	96.5475	94.8715	91.2977	91.9227	91.8348	90.8582	91.2526	89.1177	96.0807	85.2487	92.7424
1380	96.3	96.528	94.8632	91.3539	91.9798	91.8538	90.9772	91.2998	89.0607	96.1028	85.2625	92.7728
1380	96.3	96.5065	94.8603	91.4494	92.0594	91.8692	91.1212	91.3573	89.016	96.1295	85.3019	92.8191
1380	96.3	96.4806	94.8627	91.5763	92.1577	91.8789	91.2807	91.4203	88.9808	96.1582	85.3654	92.8772
1380	96.3	96.4475	94.8692	91.7244	92.2687	91.8811	91.4457	91.4836	88.9504	96.1862	85.4499	92.942
1390	96.4	96.4053	94.8783	91.882	92.3848	91.8752	91.6062	91.5426	88.9189	96.2111	85.5504	93.0074
1390	96.4	96.3535	94.8886	92.0376	92.4978	91.8615	91.7538	91.5929	88.8797	96.2313	85.6609	93.0674
1390	96.4	96.2932	94.8996	92.1815	92.6001	91.8418	91.8821	91.6313	88.827	96.2464	85.7747	93.1172
1390	96.4	96.2275	94.9115	92.3066	92.6859	91.8188	91.9872	91.6556	88.7563	96.2572	85.8856	93.1538
1390	96.4	96.1597	94.9246	92.4085	92.7515	91.7955	92.0674	91.6645	88.665	96.2651	85.9882	93.176
1400	96.3	96.0934	94.9396	92.4857	92.7957	91.7748	92.1232	91.6575	88.5524	96.2723	86.078	93.1845
1400	96.3	96.0309	94.9564	92.5389	92.8192	91.7589	92.1565	91.6352	88.4202	96.2806	86.1513	93.1813
1400	96.3	95.9729	94.9743	92.5701	92.8247	91.7484	92.1698	91.599	88.2714	96.2914	86.2054	93.1689
1400	96.3	95.9189	94.9916	92.5822	92.8157	91.7428	92.1663	91.5507	88.1105	96.3051	86.238	93.1502
1400	96.3	95.8683	95.0073	92.5795	92.7974	91.7409	92.1494	91.4929	87.9431	96.3215	86.249	93.1285
1410	96.3	95.8205	95.0204	92.5667	92.7757	91.7416	92.1231	91.4286	87.7753	96.3402	86.2401	93.1065
1410	96.2	95.7735	95.0286	92.547	92.7548	91.7426	92.0897	91.3601	87.6119	96.3591	86.2135	93.0861
1410	96.2	95.7255	95.029	92.522	92.7372	91.741	92.0503	91.2891	87.4562	96.3754	86.1724	93.0672
1410	96.2	95.6761	95.0198	92.4928	92.724	91.7343	92.0056	91.2168	87.3106	96.3864	86.1205	93.0494
1410	96.2	95.6269	95.0013	92.461	92.7157	91.7222	91.9561	91.1445	87.1765	96.3902	86.0615	93.0322
1420	96.2	95.5815	94.9758	92.4292	92.7126	91.7061	91.9028	91.0736	87.0553	96.3866	85.9995	93.0157
1420	96.2	95.5437	94.9473	92.4005	92.715	91.6895	91.8469	91.0061	86.9481	96.3768	85.9381	93.0003
1420	96.2	95.5165	94.9183	92.3768	92.7213	91.6751	91.7887	90.9434	86.8551	96.3622	85.8798	92.9861
1420	96.2	95.5024	94.8914	92.3587	92.7291	91.6653	91.728	90.8874	86.7763	96.3445	85.8257	92.9727
1420	96.2	95.5038	94.8695	92.3479	92.7366	91.6624	91.6657	90.8407	86.7125	96.3263	85.7769	92.9604
1430	96.2	95.5217	94.8552	92.3453	92.7422	91.6675	91.6029	90.8059	86.6651	96.3101	85.7332	92.9495
1430	96.1	95.5553	94.8498	92.3516	92.745	91.6801	91.5413	90.7856	86.6362	96.2979	85.694	92.9399
1430	96.1	95.6038	94.8551	92.3682	92.7458	91.6996	91.4841	90.7822	86.629	96.2919	85.6586	92.933
1430	96.1	95.6655	94.8728	92.3975	92.7476	91.7254	91.4361	90.7975	86.6474	96.294	85.6276	92.9307
1430	96	95.7372	94.9028	92.4408	92.7537	91.7559	91.4019	90.8323	86.6948	96.3049	85.601	92.9348
1430	96	95.8139	94.9422	92.4972	92.7663	91.788	91.3851	90.8854	86.773	96.3235	85.5785	92.9461
1440	96	95.8903	94.9875	92.5647	92.7867	91.8185	91.3886	90.9547	86.8825	96.3478	85.5589	92.9649
1440	96	95.9629	95.0353	92.6416	92.8166	91.8455	91.4146	91.0374	87.0228	96.3756	85.5397	92.9911
1440	96	96.0293	95.0837	92.727	92.8577	91.8691	91.4651	91.1311	87.1917	96.4054	85.5172	93.0253
1440	96	96.0883	95.1311	92.8206	92.9112	91.8915	91.5408	91.2332	87.3858	96.4363	85.487	93.068
1440	96	96.1377	95.1742	92.9201	92.976	91.9144	91.6403	91.3414	87.5993	96.467	85.4438	93.1184
1450	96	96.1751	95.2075	93.0195	93.0469	91.9373	91.7588	91.4523	87.8242	96.4946	85.3818	93.1735
1450	96.1	96.2017	95.2278	93.1144	93.1186	91.9603	91.8913	91.5639	88.0531	96.5176	85.2987	93.2307
1450	96.1	96.2212	95.2348	93.2027	93.1881	91.9847	92.0338	91.6753	88.2802	96.5359	85.1972	93.2883
1450	96.2	96.2374	95.2291	93.2825	93.2522	92.0108	92.1821	91.7857	88.5014	96.5502	85.0845	93.345
1450	96.2	96.2549	95.2125	93.3531	93.3098	92.0384	92.3331	91.895	88.7148	96.5614	84.9732	93.4002
1460	96.3	96.2796	95.1898	93.4174	93.3632	92.0683	92.4865	92.0039	88.9231	96.5721	84.8821	93.4554
1460	96.4	96.3166	95.1673	93.4804	93.4182	92.1021	92.644	92.1141	89.1319	96.5857	84.8345	93.5138
1460	96.5	96.3678	95.1493	93.5458	93.4806	92.1399	92.8076	92.227	89.3481	96.6043	84.8546	93.5781
1460	96.5	96.4318	95.1372	93.615	93.5546	92.1793	92.9781	92.3434	89.5781	96.6283	84.9645	93.6497
1460	96.6	96.5069	95.1324	93.6889	93.644	92.2177	93.1561	92.4639	89.8276	96.657	85.1797	93.7294
1470	96.7	96.5927	95.1381	93.7705	93.7537	92.2547	93.3432	92.5896	90.101	96.6907	85.5077	93.8182
1470	96.8	96.6888	95.1579	93.8635	93.8883	92.2923	93.5412	92.7217	90.3992	96.7298	85.9463	93.9175
1470	96.9	96.7912	95.192	93.9684	94.0489	92.3318	93.7493	92.8597	90.7169	96.7734	86.4816	94.0267
1470	97	96.8942	95.2371	94.0817	94.2315	92.3725	93.9636	93.0016	91.0427	96.8186	87.0887	94.1421
1470	97.1	96.9934	95.2892	94.1979	94.4295	92.4138	94.1787	93.1446	91.3608	96.8623	87.7351	94.259
1480	97.2	97.0879	95.3466	94.3145	94.6372	92.4576	94.3905	93.2862	91.6543	96.9034	88.386	94.3739
1480	97.3	97.1765	95.408	94.4286	94.8488	92.5059	94.5949	93.424	91.9052	96.9413	89.0066	94.4834
1480	97.3	97.2574	95.4698	94.5352	95.0565	92.5593	94.7867	93.5545	92.0956	96.9751	89.5636	94.5835
1480	97.4	97.3303	95.5297	94.6309	95.254	92.6181	94.962	93.6755	92.2121	97.0047	90.0316	94.6713
1480	97.5	97.396	95.5867	94.7148	95.4385	92.6838	95.1194	93.786	92.2483	97.0316	90.3958	94.746
1480	97.6	97.4527	95.6384	94.7856	95.6077	92.7558	95.2578	93.8858	92.2033	97.0567	90.6513	94.8072
1490	97.7	97.4966	95.6795	94.8395	95.7581	92.8304	95.3747	93.9741	92.0809	97.0795	90.8008	94.8533
1490	97.7	97.5243	95.7051	94.8731	95.8874	92.9022	95.4683	94.0503	91.8902	97.0987	90.8537	94.8829
1490	97.8	97.5365	95.7146	94.8874	95.997	92.968	95.5393	94.1149	91.6462	97.1146	90.8238	94.8966
1490	97.8	97.5353	95.7115	94.8881	96.0928	93.0281	95.591	94.1694	91.3668	97.1292	90.728	94.8975
1490	97.8	97.5193	95.6969	94.8789	96.1795	93.0821	95.6258	94.2144	91.0682	97.1436	90.5811	94.8879
1500	97.9	97.4836	95.6683	94.8585	96.2571	93.1264	95.6424	94.2483	90.761	97.1554	90.3938	94.8669
1500	97.9	97.4269	95.6259	94.8267	96.326	93.1588	95.6404	94.2702	90.4543	97.1633	90.1756	94.8344
1500	97.9	97.3523	95.5747	94.7873	96.3892	93.1811	95.6223	94.2811	90.1559	97.1678	89.9366	94.7922
1500	97.9	97.2636	95.5208	94.7445	96.4497	93.1966	95.5916	94.2828	89.8708	97.1702	89.6872	94.7433
1500	97.9	97.1627	95.4677	94.6993	96.5072	93.2072	95.5506	94.2773	89.5998	97.1703	89.4356	94.6892
1510	97.9	97.0527	95.4183	94.6511	96.5595	93.2139	95.5012	94.2665	89.3418	97.1675	89.1897	94.631
1510	97.8	96.9388	95.3769	94.6006	96.6053	93.2188	95.447	94.2539	89.0968	97.162	88.9587	94.5705
1510	97.8	96.8264	95.3466	94.5485	96.643	93.2233	95.3919	94.2424	88.8648	97.1543	88.7518	94.5098
1510	97.8	96.7196	95.3278	94.4935	96.6699	93.2269	95.3387	94.2343	88.6462	97.1441	88.5764	94.4498
1510	97.8	96.6231	95.3209	94.4353	96.6847	93.229	95.2899	94.2305	88.4426	97.1312	88.4382	94.3913
1520	97.7	96.5428	95.3276	94.377	96.6892	93.2305	95.2494	94.232	88.2585	97.117	88.3419	94.3368
1520	97.7	96.4842	95.3509	94.325	96.6895	93.235	95.2221	94.2391	88.1005	97.1043	88.2905	94.29
1520	97.7	96.4477	95.3902	94.2845	96.6919	93.2453	95.211	94.2512	87.9742	97.0953	88.2834	94.2542
1520	97.7	96.4259	95.4374	94.2537	96.6969	93.2592	95.2134	94.2646	87.8807	97.0884	88.3136	94.2283
1520	97.7	96.4103	95.4827	94.2283	96.7031	93.2723	95.2238	94.2748	87.8187	97.0806	88.3709	94.2092
1530	97.8	96.398	95.5227	94.2098	96.7135	93.2846	95.2405	94.2804	87.7887	97.0723	88.4472	94.1966
1530	97.8	96.3856	95.5553	94.2013	96.7324	93.2981	95.2629	94.2819	87.7907	97.0648	88.5358	94.1915
1530	97.8	96.3653	95.575	94.2006	96.7591	93.3114	95.2877	94.2793	87.8202	97.057	88.6292	94.1923
1530	97.8	96.3294	95.5754	94.202	96.7888	93.3209	95.3105	94.2722	87.8697	97.0464	88.72	94.1952
1530	97.8	96.2751	95.5543	94.2007	96.8161	93.3235	95.3282	94.2608	87.931	97.0316	88.8036	94.1973
1540	97.8	96.2053	95.5143	94.1953	96.8379	93.3187	95.3409	94.2465	87.9976	97.0128	88.8791	94.1973
1540	97.7	96.1249	95.4607	94.1854	96.8517	93.307	95.3499	94.2307	88.0631	96.9915	88.9482	94.1951
1540	97.7	96.0405	95.4004	94.1714	96.8561	93.2898	95.3574	94.2142	88.1225	96.9695	89.0139	94.1913
1540	97.7	95.96	95.3425	94.1561	96.8522	93.2704	95.3668	94.1979	88.1728	96.9498	89.0808	94.1884
1540	97.7	95.8904	95.2964	94.1442	96.8436	93.2533	95.3821	94.1827	88.2138	96.9356	89.1547	94.1898
1540	97.6	95.8363	95.2702	94.1405	96.835	93.2434	95.4067	94.1693	88.2476	96.93	89.2406	94.1994
1550	97.6	95.7959	95.2648	94.1443	96.8271	93.242	95.4399	94.1567	88.2752	96.9327	89.3405	94.2177
1550	97.6	95.7629	95.275	94.1496	96.8161	93.2448	95.4762	94.1423	88.2964	96.9396	89.452	94.2415
1550	97.6	95.7344	95.2982	94.1543	96.8014	93.2499	95.5123	94.1249	88.3144	96.9487	89.5731	94.269
1550	97.6	95.7096	95.334	94.1612	96.7872	93.2587	95.5479	94.1055	88.3343	96.9604	89.7028	94.3005
1550	97.6	95.6837	95.3785	94.1705	96.7753	93.2709	95.5814	94.0839	88.3595	96.9735	89.8382	94.3349
1560	97.6	95.6491	95.4233	94.1779	96.7634	93.2826	95.6087	94.0581	88.389	96.9849	89.9736	94.3682
1560	97.6	95.6015	95.4611	94.1795	96.7482	93.2893	95.6257	94.0248	88.4195	96.9917	90.1028	94.3963
1560	97.6	95.5414	95.4885	94.1743	96.7288	93.2892	95.6311	93.9811	88.4463	96.9934	90.2211	94.4166
1560	97.5	95.4725	95.5056	94.1644	96.7065	93.2828	95.6259	93.925	88.4635	96.9915	90.3256	94.429
1560	97.5	95.3976	95.5123	94.1508	96.6823	93.2708	95.6106	93.854	88.4626	96.9876	90.4133	94.4334
1570	97.4	95.3182	95.5079	94.1324	96.6551	93.2526	95.5845	93.7658	88.4322	96.9827	90.4805	94.4291
1570	97.4	95.236	95.4935	94.1092	96.6251	93.2289	95.5474	93.6591	88.3617	96.978	90.5243	94.4163
1570	97.3	95.1527	95.4715	94.0813	96.593	93.2008	95.4994	93.5345	88.2425	96.9748	90.5428	94.3954
1570	97.3	95.0678	95.4427	94.0466	96.558	93.1684	95.4392	93.3929	88.068	96.9728	90.534	94.3661
1570	97.2	94.9784	95.4056	93.9998	96.5162	93.1291	95.3631	93.2356	87.8338	96.9692	90.4948	94.3256
1580	97.1	94.883	95.3603	93.9366	96.465	93.0806	95.2683	93.0645	87.5406	96.9618	90.4237	94.2718
1580	97	94.7837	95.3117	93.8587	96.4071	93.0252	95.1559	92.884	87.1963	96.9507	90.322	94.2057
1580	96.9	94.6812	95.2645	93.7684	96.3457	92.9659	95.0276	92.698	86.8125	96.9362	90.192	94.1285
1580	96.8	94.5735	95.2207	93.6662	96.2828	92.9041	94.8839	92.5087	86.4021	96.9171	90.0359	94.0407
1580	96.7	94.459	95.1813	93.5522	96.219	92.8405	94.7254	92.3172	85.9785	96.8923	89.8564	93.9425
1590	96.6	94.3376	95.1475	93.4274	96.1552	92.7758	94.5528	92.1237	85.555	96.8611	89.6569	93.8343
1590	96.5	94.211	95.1206	93.2943	96.093	92.7116	94.3684	91.9289	85.1435	96.8241	89.4423	93.7175
1590	96.3	94.0806	95.1011	93.1558	96.0335	92.6492	94.1746	91.7336	84.7526	96.7825	89.2176	93.5937
1590	96.2	93.9458	95.0861	93.0116	95.975	92.5874	93.972	91.5381	84.3856	96.7368	88.9863	93.4629
1590	96	93.8058	95.0717	92.8611	95.9145	92.5239	93.7612	91.3428	84.0415	96.6873	88.7509	93.3247
1590	95.9	93.6621	95.0561	92.7059	95.8511	92.458	93.5443	91.1499	83.717	96.6359	88.5142	93.1798
1600	95.7	93.5161	95.0364	92.5471	95.7834	92.389	93.3237	90.9617	83.4061	96.5842	88.2781	93.0288
1600	95.6	93.3673	95.008	92.3832	95.7081	92.3142	93.1005	90.7798	83.0995	96.5327	88.0419	92.8709
1600	95.5	93.2161	94.9668	92.2128	95.6223	92.2315	92.8753	90.6052	82.7875	96.4812	87.8037	92.7052
1600	95.3	93.0642	94.9114	92.037	95.5258	92.1411	92.6504	90.4391	82.4621	96.4307	87.5617	92.532
1600	95.2	92.9125	94.8415	91.8571	95.4194	92.0444	92.4279	90.2819	82.1173	96.3817	87.3136	92.3521
1610	95	92.7604	94.7564	91.6732	95.3035	91.9426	92.2086	90.1327	81.7485	96.3333	87.0555	92.1654
1610	94.9	92.6072	94.6569	91.4861	95.1791	91.8378	91.993	89.9904	81.3552	96.2846	86.7844	91.9723
1610	94.8	92.4536	94.5451	91.2972	95.048	91.7325	91.782	89.8541	80.941	96.2343	86.4983	91.7739
1610	94.6	92.3011	94.4246	91.1084	94.9121	91.6298	91.5764	89.7237	80.5127	96.1815	86.1967	91.5716
1610	94.5	92.1525	94.3002	90.923	94.7739	91.5327	91.3774	89.5999	80.0807	96.1256	85.8814	91.3678
1620	94.4	92.0098	94.1762	90.7431	94.635	91.4431	91.1862	89.4839	79.6574	96.066	85.5556	91.1649
1620	94.3	91.8757	94.0573	90.5716	94.4967	91.3622	91.0042	89.3778	79.2559	96.0026	85.225	90.9663
1620	94.3	91.7547	93.9505	90.414	94.3628	91.2927	90.8351	89.2852	78.8908	95.9376	84.8979	90.7772
1620	94.2	91.6523	93.8634	90.2776	94.2391	91.2382	90.6847	89.2103	78.5756	95.8749	84.5844	90.6046
1620	94.1	91.5711	93.8	90.1665	94.1291	91.1997	90.5569	89.1564	78.3202	95.8178	84.2935	90.454
1630	94.1	91.5116	93.7604	90.0812	94.0333	91.1757	90.4538	89.1251	78.1293	95.7678	84.0316	90.3289
1630	94.1	91.4753	93.7452	90.023	93.9538	91.1651	90.3779	89.1177	78.0047	95.7273	83.8046	90.2327
1630	94.1	91.4634	93.7548	89.9939	93.8938	91.1686	90.3319	89.1351	77.9446	95.6993	83.6171	90.1687
1630	94.2	91.4745	93.7872	89.9934	93.8553	91.1858	90.3171	89.1773	77.9431	95.6859	83.4706	90.138
1630	94.2	91.506	93.8384	90.0192	93.8392	91.216	90.3329	89.2435	77.9915	95.6876	83.364	90.14
1640	94.3	91.5544	93.9027	90.0673	93.8447	91.258	90.3775	89.3323	78.0797	95.7038	83.2937	90.1726
1640	94.4	91.6167	93.9739	90.1323	93.8697	91.3096	90.4476	89.4419	78.1967	95.7324	83.2535	90.2318
1640	94.5	91.6913	94.0466	90.2092	93.9111	91.369	90.5392	89.5696	78.3329	95.7706	83.2369	90.3127
1640	94.6	91.7761	94.1151	90.2923	93.9647	91.4337	90.6474	89.7126	78.4802	95.8148	83.2368	90.4095
1640	94.7	91.8694	94.174	90.3755	94.0244	91.5001	90.7667	89.8673	78.6332	95.8608	83.2467	90.5159
1650	94.8	91.9729	94.2231	90.4574	94.0881	91.5678	90.8943	90.0313	78.7908	95.9067	83.2635	90.6281
1650	95	92.0904	94.2657	90.5405	94.1559	91.6381	91.0294	90.203	78.9555	95.9524	83.2869	90.7442
1650	95.1	92.2247	94.3055	90.6274	94.2287	91.7126	91.1718	90.3807	79.1312	95.9988	83.318	90.8634
1650	95.2	92.3764	94.3443	90.7185	94.305	91.7902	91.3198	90.5621	79.3217	96.0453	83.3579	90.984
1650	95.3	92.5461	94.385	90.8152	94.3841	91.87	91.4726	90.7451	79.5306	96.0922	83.4082	91.1052
1650	95.5	92.7364	94.4347	90.9234	94.47	91.9543	91.6329	90.9299	79.7624	96.1423	83.4736	91.2294
1660	95.6	92.9473	94.5004	91.0494	94.568	92.0463	91.8041	91.117	80.0209	96.1994	83.5591	91.3598
1660	95.8	93.1741	94.5841	91.1958	94.6807	92.1468	91.988	91.3071	80.3067	96.2651	83.6676	91.4985
1660	95.9	93.4092	94.6845	91.3609	94.8076	92.254	92.1841	91.4997	80.6176	96.3389	83.7999	91.6457
1660	96.1	93.644	94.7967	91.5401	94.9452	92.3636	92.39	91.6936	80.9493	96.4184	83.9537	91.8
1660	96.2	93.871	94.9154	91.7277	95.0888	92.4711	92.6023	91.8869	81.296	96.5	84.1252	91.9591
1670	96.4	94.0845	95.0358	91.9188	95.234	92.5729	92.8176	92.0777	81.6525	96.5803	84.3099	92.1203
1670	96.5	94.2791	95.1523	92.1077	95.3756	92.6656	93.0319	92.2639	82.0133	96.6558	84.5026	92.2807
1670	96.7	94.4528	95.2605	92.29	95.5093	92.7473	93.2416	92.4438	82.3742	96.7235	84.6984	92.4376
1670	96.8	94.6076	95.3595	92.4644	95.6336	92.8193	93.4445	92.6164	82.7331	96.7825	84.8942	92.5901
1670	96.9	94.7463	95.4474	92.6294	95.7467	92.8824	93.6383	92.781	83.0884	96.832	85.0871	92.737
1680	97	94.8731	95.5239	92.7846	95.8481	92.9387	93.8218	92.9374	83.4399	96.8722	85.2754	92.8777
1680	97.1	94.9933	95.5899	92.9307	95.9386	92.9908	93.9948	93.0858	83.7887	96.9047	85.4581	93.0128
1680	97.1	95.1126	95.6482	93.07	96.021	93.0423	94.1589	93.2271	84.1369	96.932	85.6359	93.1435
1680	97.2	95.2364	95.703	93.2065	96.1001	93.0978	94.3174	93.363	84.488	96.958	85.811	93.2725
1680	97.3	95.3657	95.756	93.3416	96.1792	93.1597	94.4727	93.4944	84.8453	96.9857	85.9859	93.402
1690	97.4	95.4971	95.8049	93.4724	96.2578	93.2262	94.6247	93.6212	85.211	97.0154	86.1612	93.5316
1690	97.4	95.6267	95.8463	93.5936	96.3329	93.2927	94.7717	93.7419	85.5863	97.046	86.3369	93.6596
1690	97.5	95.7502	95.8769	93.6992	96.4005	93.3535	94.9106	93.8542	85.9727	97.075	86.5118	93.7835
1690	97.5	95.8649	95.8959	93.785	96.4583	93.4042	95.0389	93.9568	86.3714	97.1008	86.6851	93.9013
1690	97.5	95.9697	95.9051	93.8493	96.506	93.4429	95.1545	94.049	86.7834	97.123	86.8564	94.0118
1700	97.5	96.0632	95.9066	93.8895	96.5433	93.4683	95.2544	94.1299	87.2075	97.1402	87.0239	94.1136
1700	97.5	96.1453	95.9022	93.9028	96.5695	93.4799	95.3346	94.1989	87.6401	97.1505	87.1852	94.2045
1700	97.5	96.2168	95.8939	93.8865	96.5844	93.4782	95.3914	94.2552	88.0751	97.1524	87.3375	94.2827
1700	97.4	96.2801	95.8848	93.8393	96.5887	93.4655	95.4221	94.2988	88.5054	97.1447	87.4783	94.3467
1700	97.4	96.3393	95.8799	93.7633	96.5866	93.4472	95.4271	94.3304	88.9235	97.1285	87.6062	94.3973
1700	97.3	96.397	95.8823	93.6595	96.5814	93.4282	95.4066	94.3502	89.3204	97.1045	87.7186	94.4349
1710	97.2	96.4547	95.8929	93.5275	96.5748	93.4119	95.3611	94.3579	89.6865	97.0727	87.8106	94.4592
1710	97.1	96.5139	95.9122	93.3693	96.5691	93.4015	95.2925	94.3534	90.0145	97.0342	87.8766	94.4712
1710	97.1	96.5753	95.9393	93.1883	96.566	93.399	95.2041	94.3374	90.2994	96.9906	87.9102	94.4725
1710	97	96.6381	95.9713	92.988	96.5652	93.404	95.0989	94.3104	90.5393	96.943	87.9028	94.4638
1710	96.9	96.7023	96.0049	92.7735	96.566	93.4147	94.9803	94.2739	90.7355	96.8927	87.8445	94.4465
1720	96.7	96.7677	96.0379	92.5528	96.568	93.4293	94.8525	94.2303	90.8936	96.8423	87.7251	94.4222
1720	96.6	96.8344	96.0701	92.3364	96.5724	93.4474	94.7211	94.1837	91.0217	96.7954	87.5353	94.3938
1720	96.5	96.9018	96.1008	92.1349	96.58	93.4683	94.5911	94.1382	91.1293	96.7555	87.2671	94.3639
1720	96.5	96.9663	96.1267	91.9547	96.5877	93.4888	94.465	94.0968	91.224	96.7236	86.9137	94.3325
1720	96.4	97.0244	96.144	91.8001	96.591	93.5053	94.344	94.0616	91.3125	96.6993	86.4736	94.2986
1730	96.3	97.0745	96.1515	91.6754	96.5875	93.5161	94.2306	94.0347	91.4011	96.6828	85.9547	94.2626
1730	96.2	97.1154	96.15	91.5845	96.5765	93.5219	94.1281	94.0179	91.4954	96.6742	85.3751	94.2253
1730	96.1	97.1457	96.14	91.5274	96.5573	93.5236	94.0386	94.0119	91.599	96.6726	84.761	94.188
1730	96	97.1633	96.1209	91.5001	96.5286	93.5213	93.9624	94.0158	91.7129	96.6752	84.1456	94.151
1730	96	97.1683	96.0931	91.4977	96.4902	93.5155	93.8997	94.0283	91.8369	96.6792	83.5676	94.1157
1740	95.9	97.1639	96.0599	91.517	96.4454	93.5087	93.8521	94.0491	91.9717	96.6831	83.07	94.0851
1740	95.8	97.1546	96.0252	91.5557	96.3991	93.5035	93.8215	94.0781	92.1181	96.6859	82.6959	94.0632
1740	95.7	97.1453	95.9926	91.6118	96.3564	93.5016	93.8093	94.1152	92.2766	96.6868	82.4844	94.0537
1740	95.7	97.1427	95.9673	91.6862	96.3244	93.5056	93.8178	94.1612	92.449	96.6866	82.4672	94.061
1740	95.6	97.1535	95.9554	91.7827	96.3112	93.5189	93.8507	94.2176	92.6384	96.6879	82.6658	94.0898
1750	95.6	97.1821	95.9612	91.9062	96.324	93.5441	93.9117	94.2858	92.8475	96.6939	83.0885	94.1436
1750	95.6	97.2299	95.9862	92.0596	96.3659	93.5812	94.0025	94.3662	93.0779	96.7066	83.7287	94.2234
1750	95.6	97.2959	96.0282	92.2438	96.4358	93.6279	94.1235	94.4578	93.3294	96.727	84.5645	94.3276
1750	95.6	97.378	96.0852	92.46	96.5308	93.682	94.2749	94.5593	93.6019	96.7564	85.5628	94.4536
1750	95.7	97.4739	96.1554	92.7093	96.648	93.7426	94.4573	94.6699	93.8949	96.7966	86.6821	94.5988
1750	95.8	97.5784	96.2352	92.9895	96.7817	93.8084	94.6693	94.788	94.2064	96.8482	87.8739	94.7595
1760	96	97.6843	96.3186	93.2945	96.924	93.8772	94.9072	94.9114	94.532	96.9103	89.0867	94.9301
1760	96.1	97.7844	96.3992	93.6148	97.0657	93.9467	95.1651	95.0375	94.8655	96.9806	90.2712	95.105
1760	96.3	97.8724	96.4704	93.9386	97.1976	94.0142	95.4355	95.1635	95.1987	97.0556	91.3841	95.2779
1760	96.5	97.944	96.5261	94.253	97.3109	94.077	95.7097	95.2862	95.5221	97.1312	92.3919	95.4425
1760	96.7	97.9976	96.5628	94.5459	97.3994	94.1332	95.9787	95.4026	95.8263	97.203	93.2735	95.5935
1770	96.9	98.0354	96.5801	94.8082	97.4606	94.1824	96.235	95.5103	96.1029	97.2682	94.0204	95.7275
1770	97.1	98.062	96.5815	95.0354	97.4967	94.2265	96.4737	95.608	96.3464	97.3255	94.6359	95.8434
1770	97.3	98.0826	96.5715	95.2265	97.5125	94.2679	96.6915	95.695	96.5536	97.3753	95.132	95.9419
1770	97.5	98.1012	96.5548	95.3823	97.5136	94.3083	96.8864	95.7709	96.7236	97.4179	95.5263	96.0241
1770	97.6	98.1212	96.5357	95.5059	97.5056	94.3483	97.0575	95.8357	96.8577	97.4541	95.8385	96.0919
1780	97.8	98.1454	96.5185	95.6028	97.4949	94.3884	97.2056	95.8903	96.9606	97.4858	96.0881	96.1481
1780	97.9	98.1756	96.5082	95.6809	97.4878	94.4294	97.3333	95.9366	97.04	97.5154	96.2935	96.1964
1780	98	98.2112	96.5079	95.7481	97.4894	94.4717	97.4436	95.9768	97.1047	97.5453	96.4695	96.2402
1780	98.1	98.2489	96.5177	95.809	97.5015	94.5135	97.5381	96.013	97.1632	97.5766	96.6264	96.2816
1780	98.2	98.2847	96.5362	95.8669	97.5231	94.553	97.6185	96.0467	97.2231	97.6093	96.7705	96.3214
1790	98.3	98.3147	96.5606	95.9228	97.5516	94.5877	97.6856	96.0788	97.29	97.6427	96.9055	96.3598
1790	98.3	98.3353	96.5867	95.9749	97.5815	94.6148	97.7396	96.1091	97.3666	97.6744	97.0319	96.3952
1790	98.4	98.345	96.6104	96.0204	97.6069	94.6319	97.7802	96.1364	97.4526	97.7021	97.1489	96.4255
1790	98.4	98.3456	96.6299	96.0577	97.6238	94.6391	97.8085	96.1598	97.5463	97.7238	97.2557	96.4493
1790	98.4	98.3406	96.6448	96.0864	97.63	94.6381	97.8266	96.1784	97.6443	97.7389	97.3518	96.4664
1800	98.4	98.3345	96.656	96.1068	97.6252	94.6321	97.8374	96.1919	97.7417	97.7473	97.4377	96.477
1800	98.4	98.3315	96.6642	96.1198	97.6107	94.6245	97.8435	96.2004	97.8329	97.7498	97.5148	96.4823
1800	98.4	98.3348	96.6703	96.1268	97.5886	94.6183	97.8474	96.2046	97.9123	97.7474	97.5847	96.4835
1800	98.4	98.3474	96.6755	96.1298	97.5624	94.6161	97.8512	96.2059	97.9756	97.7416	97.6493	96.4827
1800	98.4	98.3712	96.6816	96.1326	97.5372	94.6206	97.8572	96.2063	98.0208	97.7348	97.7112	96.4825
1810	98.4	98.4056	96.6898	96.1386	97.5177	94.6332	97.8668	96.208	98.0486	97.7296	97.7724	96.4851
1810	98.4	98.4471	96.6992	96.1489	97.5063	94.6526	97.8798	96.2125	98.0604	97.727	97.8337	96.4913
1810	98.4	98.4913	96.7083	96.1636	97.5041	94.6766	97.8951	96.2203	98.0602	97.7279	97.895	96.5012
1810	98.5	98.5346	96.717	96.1836	97.512	94.7029	97.9123	96.2319	98.0537	97.7329	97.957	96.5148
1810	98.5	98.5733	96.7249	96.2088	97.5296	94.7295	97.9311	96.2468	98.0479	97.7423	98.0198	96.5314
1810	98.5	98.604	96.7311	96.2375	97.5544	94.7538	97.9505	96.2639	98.0488	97.7556	98.0824	96.5496
1820	98.5	98.6247	96.7351	96.2678	97.5832	94.7739	97.9696	96.2816	98.0616	97.7716	98.1436	96.5678
1820	98.5	98.6347	96.7371	96.2972	97.6122	94.7887	97.9878	96.2987	98.0897	97.7891	98.2018	96.5845
1820	98.6	98.6352	96.7378	96.3237	97.6382	94.7984	98.0045	96.3141	98.1341	97.8067	98.2555	96.5987
1820	98.6	98.6284	96.7387	96.346	97.6587	94.8041	98.0196	96.3276	98.1937	97.8237	98.3045	96.6099
1820	98.6	98.617	96.7408	96.3633	97.6724	94.8079	98.033	96.3396	98.2651	97.8395	98.3487	96.6185
1830	98.6	98.6039	96.7453	96.3753	97.6787	94.8115	98.0444	96.3504	98.3431	97.8535	98.3887	96.6249
1830	98.6	98.5922	96.7532	96.3828	97.6785	94.8172	98.054	96.3608	98.4215	97.8658	98.4258	96.6303
1830	98.6	98.5838	96.7651	96.3873	97.6738	94.8267	98.0622	96.3718	98.4944	97.8768	98.4613	96.636
1830	98.6	98.5784	96.779	96.3887	97.6653	94.8397	98.0684	96.3831	98.5555	97.8859	98.4955	96.6422
1830	98.6	98.5744	96.7918	96.3855	97.6526	94.8537	98.0713	96.3936	98.5988	97.8919	98.5274	96.6478
1840	98.6	98.5718	96.8016	96.3783	97.6368	94.8667	98.071	96.4024	98.6216	97.8944	98.5568	96.6525
1840	98.6	98.5716	96.8083	96.3693	97.6201	94.8778	98.0689	96.4093	98.6248	97.8937	98.5842	96.6565
1840	98.6	98.5745	96.8118	96.3606	97.6047	94.8861	98.0665	96.414	98.6117	97.8906	98.6103	96.6599
1840	98.6	98.5808	96.8123	96.3541	97.5922	94.8912	98.0653	96.4171	98.5878	97.8857	98.6356	96.663
1840	98.6	98.5907	96.8103	96.3514	97.5837	94.8931	98.0662	96.4193	98.56	97.88	98.6602	96.6659
1850	98.6	98.6044	96.8067	96.3532	97.5799	94.8927	98.0697	96.4215	98.5352	97.8742	98.6843	96.6688
1850	98.6	98.6219	96.8034	96.3608	97.5816	94.8919	98.0761	96.4252	98.5205	97.8698	98.7081	96.6725
1850	98.6	98.6436	96.8027	96.3756	97.59	94.8936	98.086	96.4316	98.5215	97.8686	98.7326	96.6782
1850	98.6	98.6684	96.8065	96.3979	97.6055	94.9006	98.0992	96.4416	98.5418	97.872	98.7586	96.6871
1850	98.6	98.6946	96.8157	96.427	97.6279	94.915	98.1154	96.4557	98.5822	97.881	98.787	96.6999
1860	98.6	98.7196	96.8304	96.4614	97.6561	94.9378	98.134	96.4733	98.6403	97.8961	98.8184	96.717
1860	98.7	98.7393	96.8482	96.4968	97.6867	94.9674	98.1529	96.493	98.7104	97.9156	98.8516	96.7371
1860	98.7	98.7498	96.8649	96.527	97.7139	94.9994	98.1692	96.5122	98.7835	97.9366	98.8839	96.7576
1860	98.7	98.7502	96.8779	96.5474	97.7332	95.0294	98.181	96.5286	98.8506	97.9561	98.9127	96.7758
1860	98.7	98.743	96.8871	96.5572	97.7429	95.0546	98.1885	96.5413	98.9051	97.9724	98.9367	96.7906
1860	98.7	98.7318	96.8934	96.5576	97.7429	95.0735	98.1927	96.5505	98.9425	97.9847	98.9558	96.8017
1870	98.7	98.7202	96.898	96.5505	97.7344	95.0852	98.1949	96.5571	98.9609	97.9927	98.9704	96.8094
1870	98.7	98.7115	96.902	96.539	97.7194	95.0901	98.1962	96.5623	98.9608	97.9965	98.9815	96.8141
1870	98.7	98.7079	96.9064	96.5263	97.7004	95.0893	98.1975	96.5675	98.9453	97.9967	98.9903	96.8169
1870	98.7	98.7109	96.9119	96.5152	97.6804	95.085	98.1993	96.5735	98.9196	97.9944	98.9979	96.8187
1870	98.7	98.7212	96.9196	96.5092	97.6632	95.0805	98.2022	96.581	98.8903	97.9911	99.0058	96.8212
1880	98.7	98.7381	96.9302	96.5108	97.6519	95.0791	98.2067	96.5903	98.8644	97.9889	99.0153	96.8256
1880	98.7	98.7594	96.9433	96.5207	97.6489	95.0836	98.213	96.6009	98.8479	97.9893	99.0272	96.8331
1880	98.7	98.7816	96.9577	96.5383	97.6549	95.0955	98.2209	96.6123	98.845	97.9929	99.0417	96.8437
1880	98.7	98.8008	96.9713	96.5605	97.6687	95.1143	98.2294	96.6235	98.8572	97.9999	99.0584	96.8565
1880	98.7	98.8134	96.9814	96.5829	97.6868	95.1374	98.237	96.6332	98.8826	98.0089	99.0756	96.8696
1890	98.7	98.8186	96.9864	96.6016	97.7057	95.1617	98.2423	96.6408	98.918	98.0186	99.0914	96.8809
1890	98.8	98.8182	96.9875	96.6155	97.7237	95.1851	98.2458	96.6466	98.9598	98.0286	99.105	96.8897
1890	98.8	98.8149	96.9869	96.625	97.7398	95.2061	98.2486	96.6515	99.0042	98.039	99.1163	96.8958
1890	98.8	98.8114	96.9865	96.6311	97.7531	95.2236	98.2513	96.6568	99.0474	98.0499	99.1255	96.8998
1890	98.8	98.8096	96.988	96.6351	97.7632	95.2368	98.2546	96.6632	99.0857	98.061	99.133	96.9023
1900	98.8	98.8106	96.9925	96.6382	97.7698	95.2456	98.2587	96.6709	99.1163	98.0723	99.1399	96.9043
1900	98.8	98.8147	97.0003	96.6418	97.7726	95.2506	98.2633	96.6796	99.1376	98.0833	99.1467	96.9065
1900	98.8	98.8217	97.0109	96.6465	97.7715	95.2528	98.2681	96.6885	99.149	98.0937	99.154	96.9096
1900	98.8	98.8305	97.024	96.6532	97.7673	95.254	98.273	96.6969	99.1516	98.1031	99.162	96.9145
1900	98.8	98.8396	97.0385	96.6623	97.761	95.2565	98.2781	96.7042	99.1474	98.1115	99.1708	96.9215
1910	98.8	98.8462	97.0523	96.6723	97.753	95.2616	98.2829	96.7101	99.1388	98.1182	99.1796	96.9302
1910	98.8	98.8479	97.0627	96.6813	97.7433	95.2695	98.2866	96.7145	99.128	98.1225	99.1873	96.9394
1910	98.8	98.8433	97.0682	96.6871	97.732	95.2802	98.2888	96.7176	99.1171	98.1238	99.1927	96.9478
1910	98.8	98.8325	97.0676	96.6879	97.7195	95.2927	98.2888	96.7199	99.1078	98.1219	99.1949	96.9538
1910	98.8	98.8176	97.0616	96.6834	97.7071	95.3059	98.2867	96.7218	99.1021	98.1172	99.1934	96.9565
1910	98.8	98.8014	97.0521	96.6745	97.6965	95.3188	98.2831	96.7236	99.1012	98.1107	99.1882	96.9557
1920	98.8	98.7868	97.0413	96.663	97.6893	95.3305	98.2785	96.7257	99.1062	98.1038	99.1797	96.9519
1920	98.8	98.7759	97.0315	96.6509	97.6867	95.3397	98.2734	96.7276	99.117	98.0977	99.1687	96.9459
1920	98.8	98.7701	97.0247	96.6399	97.6889	95.3456	98.2682	96.7289	99.1327	98.0935	99.156	96.9387
1920	98.8	98.7701	97.0221	96.632	97.6956	95.3476	98.263	96.7288	99.1519	98.0917	99.1428	96.9314
1920	98.8	98.7758	97.0244	96.6281	97.7052	95.3455	98.258	96.7269	99.1724	98.0927	99.1299	96.925
1930	98.8	98.7862	97.0318	96.6294	97.7162	95.3404	98.2536	96.7233	99.1922	98.0965	99.1185	96.9204
1930	98.8	98.7998	97.044	96.6363	97.727	95.3339	98.2506	96.7189	99.2096	98.1029	99.1093	96.9186
1930	98.8	98.8135	97.0592	96.6478	97.7354	95.3278	98.2493	96.7148	99.2229	98.111	99.1022	96.9195
1930	98.8	98.8241	97.0744	96.661	97.7383	95.3229	98.2487	96.7118	99.23	98.1193	99.0963	96.9221
1930	98.8	98.8295	97.0869	96.673	97.7335	95.32	98.2483	96.7104	99.2296	98.1261	99.0903	96.9251
1940	98.8	98.8296	97.0952	96.6817	97.7205	95.3199	98.2475	96.7108	99.2215	98.1306	99.0834	96.9273
1940	98.8	98.825	97.0983	96.6854	97.7	95.3231	98.246	96.7128	99.2069	98.1324	99.0749	96.9277
1940	98.8	98.8175	97.0964	96.6836	97.6742	95.3298	98.2434	96.7155	99.1874	98.1314	99.0647	96.9259
1940	98.8	98.8089	97.0905	96.6769	97.6462	95.3396	98.2399	96.7178	99.1657	98.1286	99.0529	96.9219
1940	98.8	98.801	97.0819	96.6664	97.6196	95.3516	98.2354	96.7189	99.1447	98.125	99.0398	96.9162
1950	98.8	98.7949	97.072	96.6536	97.5975	95.3645	98.2298	96.7177	99.127	98.1218	99.0259	96.9094
1950	98.8	98.7917	97.0626	96.6404	97.5827	95.3767	98.2233	96.7143	99.1148	98.1199	99.0116	96.9022
1950	98.8	98.7916	97.055	96.6289	97.5765	95.3868	98.2163	96.709	99.1096	98.1202	98.9976	96.8957
1950	98.8	98.7946	97.0507	96.621	97.5797	95.3942	98.2094	96.703	99.1123	98.1231	98.9847	96.8906
1950	98.8	98.7993	97.0506	96.6183	97.5913	95.3986	98.2033	96.6976	99.1226	98.1287	98.9739	96.8877
1960	98.8	98.8037	97.0545	96.6209	97.6089	95.4001	98.1984	96.6943	99.1391	98.1363	98.9651	96.8869
1960	98.8	98.8059	97.0613	96.6272	97.6282	95.3987	98.1945	96.6934	99.159	98.144	98.9577	96.8874
1960	98.8	98.805	97.0699	96.6356	97.6451	95.3949	98.1911	96.6949	99.1791	98.1502	98.9506	96.8881
1960	98.8	98.8019	97.0799	96.6447	97.6562	95.3902	98.1885	96.6982	99.1966	98.1534	98.9433	96.8885
1960	98.8	98.7977	97.0911	96.6538	97.6599	95.3865	98.1867	96.7026	99.2094	98.1532	98.9356	96.8881
1970	98.7	98.7936	97.1033	96.662	97.6554	95.3858	98.1858	96.707	99.2159	98.1494	98.9274	96.8871
1970	98.7	98.7904	97.1159	96.6687	97.6434	95.3891	98.1857	96.7106	99.2155	98.1426	98.919	96.8855
1970	98.7	98.7888	97.1286	96.6736	97.6258	95.3972	98.1861	96.7128	99.2086	98.1339	98.9106	96.8837
1970	98.7	98.7891	97.1404	96.6763	97.6052	95.4097	98.1866	96.7137	99.1961	98.1247	98.9025	96.8822
1970	98.7	98.7912	97.1507	96.6774	97.5847	95.4255	98.1869	96.7138	99.1802	98.1166	98.8949	96.8815
1970	98.7	98.7948	97.1589	96.6772	97.5675	95.4432	98.1868	96.7142	99.1632	98.1116	98.8879	96.8821
1980	98.7	98.799	97.1646	96.6769	97.5563	95.4613	98.1866	96.7159	99.148	98.1112	98.8819	96.8844
1980	98.8	98.8023	97.1672	96.6771	97.5527	95.4782	98.1865	96.7197	99.1369	98.1164	98.8771	96.8886
1980	98.8	98.8028	97.166	96.6779	97.5564	95.4923	98.1866	96.7259	99.1317	98.127	98.8731	96.8942
1980	98.8	98.7995	97.1607	96.6785	97.5657	95.502	98.1866	96.7338	99.1328	98.1421	98.8693	96.9
1980	98.8	98.793	97.1519	96.679	97.5785	95.5071	98.1864	96.7425	99.1401	98.16	98.8652	96.9054
1990	98.8	98.7847	97.1415	96.68	97.5926	95.5086	98.1867	96.7508	99.153	98.1794	98.8604	96.9099
1990	98.8	98.7766	97.1315	96.682	97.6059	95.5084	98.1876	96.758	99.1706	98.1985	98.8548	96.9134
1990	98.8	98.77	97.124	96.6856	97.6166	95.5087	98.1893	96.7636	99.1909	98.2159	98.8484	96.9161
1990	98.8	98.7658	97.1209	96.6909	97.6232	95.5116	98.1915	96.7675	99.2117	98.2302	98.8414	96.9183
1990	98.8	98.7646	97.1233	96.6976	97.6251	95.5184	98.1938	96.7701	99.2307	98.2403	98.8341	96.9203
2000	98.8	98.7669	97.1321	96.7055	97.6223	95.53	98.1956	96.772	99.2457	98.2459	98.8267	96.9227
2000	98.8	98.7726	97.1471	96.7141	97.6157	95.5461	98.1966	96.7743	99.2552	98.2474	98.8196	96.9257
2000	98.8	98.7812	97.1677	96.723	97.6069	95.5661	98.1968	96.7778	99.2582	98.2456	98.8128	96.9299
2000	98.8	98.7915	97.1926	96.7319	97.5978	95.5882	98.1967	96.7834	99.2548	98.242	98.8064	96.9355
2000	98.8	98.8017	97.2198	96.7402	97.5902	95.6107	98.1967	96.7911	99.246	98.2384	98.8004	96.9424
2010	98.8	98.8098	97.2466	96.7472	97.585	95.6312	98.1972	96.8006	99.2329	98.236	98.7941	96.9503
2010	98.8	98.8145	97.2704	96.7517	97.5823	95.6477	98.1985	96.8108	99.2173	98.2358	98.7871	96.9583
2010	98.8	98.8161	97.2893	96.7538	97.5822	95.659	98.2007	96.8209	99.2015	98.2386	98.7789	96.9658
2010	98.8	98.8156	97.3026	96.7542	97.5846	95.6654	98.2043	96.8299	99.1881	98.2449	98.7694	96.9726
2010	98.8	98.814	97.3101	96.754	97.589	95.6684	98.2091	96.8375	99.1795	98.255	98.7586	96.9789
2020	98.8	98.8121	97.3124	96.754	97.5947	95.6699	98.2147	96.8435	99.1777	98.2683	98.7465	96.9847
2020	98.8	98.8107	97.3101	96.7553	97.6004	95.672	98.2201	96.8483	99.1833	98.2839	98.7334	96.99
2020	98.8	98.8105	97.3046	96.7583	97.6053	95.677	98.2245	96.8522	99.1963	98.3005	98.7194	96.9953
2020	98.8	98.8121	97.2975	96.7634	97.6085	95.6864	98.2271	96.8559	99.2152	98.3168	98.7052	97.0005
2020	98.8	98.816	97.2904	96.7705	97.6097	95.7008	98.2277	96.8599	99.2381	98.3315	98.6913	97.0059
2020	98.8	98.8221	97.2851	96.7794	97.609	95.7202	98.2265	96.8649	99.2622	98.3437	98.6782	97.0115
2030	98.8	98.8299	97.2828	96.7897	97.6069	95.7434	98.2244	96.8711	99.2846	98.3527	98.6663	97.0175
2030	98.9	98.8383	97.2847	96.8004	97.6042	95.7683	98.2224	96.8787	99.3025	98.3585	98.6557	97.0238
2030	98.9	98.846	97.2908	96.8105	97.6014	95.7924	98.2215	96.8874	99.3137	98.3614	98.6461	97.0301
2030	98.9	98.8523	97.3011	96.8188	97.5992	95.8131	98.2224	96.8968	99.3166	98.3619	98.637	97.0363
2030	98.9	98.8573	97.3151	96.8247	97.5981	95.8284	98.2252	96.9063	99.3109	98.361	98.6279	97.042
2040	98.9	98.8616	97.3326	96.8283	97.5987	95.8375	98.23	96.9155	99.2979	98.3599	98.6188	97.0473
2040	98.9	98.8654	97.353	96.8302	97.6014	95.8407	98.2363	96.924	99.2798	98.3601	98.6098	97.0524
2040	98.9	98.869	97.3751	96.8311	97.606	95.8394	98.2431	96.9317	99.2596	98.3628	98.6008	97.0573
2040	98.9	98.8724	97.3977	96.8316	97.6121	95.8356	98.2494	96.9386	99.2408	98.3686	98.5918	97.0621
2040	98.9	98.8757	97.4195	96.8326	97.6188	95.8318	98.2541	96.9446	99.2262	98.3779	98.5827	97.0666
2050	98.9	98.8792	97.4394	96.8347	97.6252	95.8306	98.2568	96.9499	99.2184	98.3905	98.5736	97.0709
2050	98.9	98.8832	97.4561	96.8383	97.6305	95.8339	98.2576	96.9549	99.219	98.4056	98.5647	97.075
2050	98.9	98.8875	97.4689	96.8434	97.6337	95.843	98.257	96.96	99.2282	98.422	98.5563	97.0788
2050	98.9	98.8918	97.4772	96.85	97.6344	95.858	98.2562	96.9658	99.2452	98.4386	98.5485	97.0825
2050	98.9	98.8953	97.4807	96.8573	97.6324	95.8777	98.2562	96.9724	99.2678	98.4537	98.5413	97.0861
2060	98.9	98.8976	97.4796	96.8645	97.6276	95.9	98.2578	96.9799	99.2929	98.4663	98.5343	97.0895
2060	98.9	98.8988	97.4742	96.8708	97.6206	95.9221	98.2611	96.988	99.3173	98.4752	98.5271	97.0929
2060	98.9	98.8993	97.4658	96.8755	97.6123	95.9413	98.2662	96.9962	99.3377	98.4799	98.5193	97.096
2060	98.9	98.8997	97.4558	96.8783	97.6037	95.9553	98.2722	97.0039	99.3516	98.4808	98.5109	97.099
2060	98.9	98.9003	97.4456	96.8792	97.5962	95.9628	98.2784	97.0107	99.3575	98.4785	98.5017	97.1018
2070	98.9	98.9014	97.4367	96.8785	97.5906	95.9633	98.2835	97.016	99.3549	98.4742	98.4921	97.1042
2070	98.9	98.903	97.4305	96.8765	97.5876	95.9575	98.2866	97.0197	99.3445	98.4693	98.482	97.1061
2070	98.9	98.9053	97.428	96.8738	97.5876	95.9471	98.2875	97.022	99.3278	98.4652	98.4718	97.1075
2070	99	98.9085	97.43	96.871	97.5902	95.9349	98.2863	97.0234	99.3074	98.463	98.4614	97.1084
2070	99	98.9126	97.4366	96.8687	97.5948	95.9234	98.2838	97.0248	99.2862	98.4638	98.4511	97.1087
2080	99	98.9175	97.4478	96.8673	97.6004	95.9156	98.2811	97.0269	99.2671	98.4678	98.441	97.1086
2080	99	98.9226	97.4627	96.8672	97.606	95.9133	98.2793	97.0303	99.2525	98.4751	98.4313	97.1083
2080	99	98.9274	97.4804	96.8682	97.6101	95.9174	98.2794	97.0352	99.244	98.4849	98.4219	97.108
2080	99	98.9313	97.4995	96.8699	97.6115	95.9278	98.2815	97.0413	99.2424	98.496	98.4127	97.1075
2080	99	98.9345	97.5187	96.872	97.6096	95.9431	98.2853	97.0479	99.2473	98.5073	98.4035	97.107
2080	99	98.9373	97.5368	96.8742	97.6041	95.9612	98.2901	97.054	99.2577	98.5173	98.3941	97.1064
2090	99	98.9399	97.5526	96.8763	97.5952	95.9796	98.295	97.0586	99.272	98.5253	98.3843	97.1057
2090	99	98.9425	97.5653	96.8778	97.5835	95.9958	98.2987	97.0613	99.288	98.5304	98.3739	97.1048
2090	99	98.9449	97.574	96.8787	97.57	96.0073	98.3004	97.0617	99.3033	98.5327	98.3628	97.1037
2090	99	98.9472	97.5785	96.8788	97.5557	96.0129	98.2998	97.0605	99.316	98.5323	98.3511	97.1023
2090	99	98.9495	97.5787	96.8781	97.5419	96.0119	98.2971	97.0584	99.3242	98.5302	98.3389	97.1007
2100	99	98.9519	97.575	96.8767	97.5297	96.0052	98.2929	97.0568	99.3269	98.5272	98.3263	97.0988
2100	99	98.9547	97.5679	96.8748	97.5198	95.9942	98.2884	97.0568	99.3239	98.5249	98.3135	97.0969
2100	99	98.9576	97.5583	96.8727	97.5127	95.9813	98.2846	97.059	99.3156	98.5242	98.3005	97.0951
2100	99	98.9603	97.5471	96.8705	97.5087	95.9689	98.2822	97.0636	99.3031	98.5263	98.2873	97.0933
2100	99	98.9625	97.5353	96.8684	97.5073	95.9592	98.2815	97.07	99.2879	98.5316	98.2741	97.0916
2110	99	98.9641	97.5241	96.8663	97.5079	95.954	98.2823	97.0771	99.2716	98.5399	98.2609	97.0898
2110	99	98.9652	97.5147	96.8646	97.5099	95.9541	98.2839	97.0835	99.2562	98.5507	98.2479	97.0878
2110	99	98.966	97.508	96.8631	97.5124	95.9596	98.2853	97.0881	99.243	98.5629	98.2352	97.0856
2110	99	98.9669	97.5051	96.8619	97.5144	95.9694	98.2859	97.0902	99.2336	98.5753	98.2228	97.083
2110	99	98.9677	97.5065	96.861	97.5154	95.9819	98.2851	97.0897	99.2287	98.5864	98.2108	97.08
2120	99	98.9685	97.5123	96.8602	97.5145	95.9951	98.2826	97.0873	99.2285	98.5949	98.1991	97.0766
2120	99	98.9692	97.5227	96.8597	97.5115	96.0069	98.2788	97.0843	99.2326	98.5997	98.1878	97.073
2120	99	98.97	97.537	96.8593	97.5062	96.0156	98.2745	97.082	99.2403	98.6003	98.177	97.0693
2120	99	98.971	97.5544	96.8589	97.4989	96.02	98.2704	97.0817	99.2504	98.5968	98.1669	97.0657
2120	99	98.9724	97.5738	96.8586	97.49	96.0198	98.2674	97.084	99.2614	98.5897	98.1574	97.0623
2130	99	98.9741	97.5936	96.8583	97.4801	96.0155	98.266	97.0888	99.2719	98.5803	98.1486	97.0592
2130	99	98.976	97.6122	96.8581	97.4699	96.0082	98.2661	97.0953	99.2806	98.57	98.1402	97.0566
2130	99	98.9778	97.6282	96.8577	97.4603	95.9995	98.2676	97.1024	99.2865	98.5603	98.1319	97.0543
2130	99	98.9796	97.6402	96.8572	97.4519	95.991	98.2697	97.1085	99.2887	98.5529	98.1236	97.0521
2130	99	98.9813	97.6472	96.8565	97.4454	95.9844	98.2716	97.1128	99.287	98.549	98.1153	97.0499
2130	99	98.9832	97.6487	96.8555	97.4413	95.9808	98.2727	97.1149	99.2814	98.5495	98.1068	97.0475
2140	99	98.9852	97.6445	96.854	97.4396	95.9807	98.2728	97.1149	99.2726	98.5546	98.0984	97.0448
2140	99	98.9873	97.6351	96.8521	97.4404	95.9841	98.2717	97.1138	99.2614	98.564	98.0899	97.0421
2140	99	98.9892	97.6214	96.8498	97.4432	95.9903	98.27	97.113	99.249	98.5768	98.0816	97.0394
2140	99	98.991	97.6047	96.8471	97.4475	95.9981	98.2682	97.1137	99.2366	98.5918	98.0734	97.0369
2140	99.1	98.9926	97.5867	96.8442	97.4526	96.0063	98.267	97.1168	99.2257	98.6074	98.0654	97.0348
2150	99.1	98.994	97.5693	96.8414	97.4578	96.0136	98.2669	97.1224	99.2174	98.622	98.058	97.0331
2150	99.1	98.9953	97.5543	96.8391	97.4622	96.019	98.2681	97.1301	99.2126	98.6343	98.0512	97.0321
2150	99.1	98.9965	97.5433	96.8374	97.4653	96.0219	98.2706	97.1387	99.2121	98.6431	98.0453	97.0314
2150	99.1	98.9975	97.5376	96.8367	97.4664	96.0225	98.2738	97.1469	99.2158	98.6478	98.0401	97.031
2150	99.1	98.9982	97.5383	96.8371	97.4654	96.0209	98.2774	97.1535	99.2234	98.6485	98.0357	97.0307
2160	99.1	98.9985	97.5456	96.8389	97.4622	96.0181	98.2807	97.1577	99.2343	98.6455	98.0319	97.0301
2160	99.1	98.9987	97.5593	96.8418	97.4571	96.0149	98.2835	97.1595	99.2471	98.6397	98.0285	97.0291
2160	99.1	98.9988	97.5786	96.8458	97.4506	96.0121	98.2857	97.1598	99.2603	98.6323	98.0256	97.0277
2160	99.1	98.9991	97.6021	96.8506	97.4436	96.0104	98.2877	97.1596	99.2722	98.6247	98.0231	97.026
2160	99.1	98.9995	97.628	96.8555	97.4367	96.0101	98.2897	97.1602	99.2814	98.6182	98.0213	97.0242
2170	99.1	99.0002	97.6541	96.8602	97.4309	96.0111	98.2924	97.1627	99.2866	98.6136	98.02	97.0228
2170	99.1	99.001	97.6782	96.8641	97.4269	96.0131	98.296	97.1678	99.287	98.6118	98.0192	97.0219
2170	99.1	99.002	97.6982	96.8668	97.4251	96.0155	98.3007	97.1753	99.2826	98.613	98.0189	97.0217
2170	99.1	99.0033	97.7125	96.8679	97.4259	96.0175	98.3064	97.1843	99.274	98.617	98.0187	97.0222
2170	99.1	99.0049	97.7197	96.8671	97.4291	96.0189	98.3127	97.1939	99.2624	98.6233	98.0188	97.0232
2180	99.1	99.0068	97.7194	96.8646	97.4345	96.0195	98.3191	97.2027	99.2496	98.6312	98.0189	97.0243
2180	99.1	99.0087	97.7116	96.8606	97.4412	96.0192	98.3249	97.21	99.2375	98.6399	98.019	97.0253
2180	99.1	99.0105	97.6973	96.8555	97.4485	96.0187	98.3298	97.2152	99.2283	98.6485	98.019	97.026
2180	99.1	99.0121	97.678	96.8499	97.4553	96.0186	98.3336	97.2187	99.2237	98.6564	98.0187	97.0262
2180	99.1	99.0134	97.6558	96.8446	97.4607	96.0195	98.3367	97.2213	99.2249	98.663	98.0181	97.0259
2180	99.1	99.0146	97.633	96.8403	97.4641	96.022	98.3393	97.2242	99.2324	98.6681	98.0171	97.0254
2190	99.1	99.0156	97.6122	96.8376	97.465	96.0265	98.342	97.2284	99.2456	98.6717	98.0157	97.0249
2190	99.1	99.0165	97.5958	96.8371	97.4635	96.033	98.3454	97.2344	99.2634	98.674	98.014	97.0247
2190	99.1	99.0173	97.5857	96.8391	97.4599	96.0409	98.3497	97.2424	99.2836	98.6753	98.0122	97.0252
2190	99.1	99.0182	97.5836	96.8437	97.4549	96.0494	98.3551	97.2519	99.3039	98.6761	98.0105	97.0265
2190	99.1	99.019	97.5899	96.8505	97.4493	96.0574	98.3613	97.2619	99.3218	98.6765	98.0088	97.0283
2200	99.1	99.02	97.6048	96.859	97.4442	96.0638	98.3679	97.2715	99.3351	98.6769	98.0071	97.0305
2200	99.1	99.0211	97.6272	96.8685	97.4405	96.0678	98.3744	97.2796	99.3421	98.6774	98.0051	97.0326
2200	99.1	99.0225	97.6555	96.8778	97.4388	96.0688	98.3804	97.2857	99.342	98.678	98.0027	97.0343
2200	99.1	99.0239	97.6874	96.886	97.4394	96.067	98.3854	97.2898	99.335	98.6788	97.9997	97.0352
2200	99.1	99.0253	97.7202	96.8923	97.4424	96.0628	98.3895	97.2922	99.3223	98.6796	97.9962	97.0353
2210	99.1	99.0266	97.7511	96.8959	97.4472	96.0574	98.3928	97.2937	99.306	98.6806	97.9922	97.0348
2210	99.1	99.0277	97.7774	96.8965	97.4532	96.052	98.3955	97.2953	99.2887	98.6816	97.9877	97.0338
2210	99.1	99.0287	97.7969	96.8938	97.4595	96.0481	98.398	97.2978	99.2733	98.6828	97.983	97.0327
2210	99.1	99.0296	97.808	96.8884	97.4649	96.047	98.4007	97.3015	99.2622	98.6843	97.978	97.0319
2210	99.1	99.0305	97.8101	96.881	97.4688	96.0495	98.4037	97.3065	99.2574	98.6863	97.973	97.0316
2220	99.2	99.0314	97.8033	96.8725	97.4706	96.056	98.407	97.3125	99.26	98.689	97.9681	97.032
2220	99.2	99.0322	97.7888	96.8642	97.4698	96.0659	98.4104	97.3188	99.2699	98.6926	97.9637	97.033
2220	99.2	99.0331	97.7685	96.8574	97.4668	96.0783	98.4138	97.3247	99.2859	98.6973	97.9597	97.0344
2220	99.2	99.034	97.7449	96.853	97.4619	96.0916	98.4168	97.3298	99.3059	98.7029	97.9564	97.036
2220	99.2	99.035	97.7208	96.8518	97.456	96.104	98.4193	97.3338	99.327	98.7095	97.9534	97.0374
2230	99.2	99.036	97.6991	96.8543	97.45	96.1139	98.4214	97.3369	99.3464	98.7165	97.9506	97.0385
2230	99.2	99.037	97.6825	96.8604	97.4447	96.12	98.4232	97.3394	99.3612	98.7237	97.9474	97.0392
2230	99.2	99.0377	97.6731	96.8697	97.4411	96.1215	98.4249	97.3418	99.3692	98.7305	97.9438	97.0394
2230	99.2	99.0381	97.6723	96.8814	97.4396	96.1187	98.4269	97.3446	99.3695	98.7363	97.9395	97.0394
2230	99.2	99.038	97.6807	96.8943	97.4405	96.1123	98.4293	97.348	99.3621	98.7408	97.9346	97.0393
2240	99.2	99.0375	97.6979	96.9071	97.4437	96.1038	98.4322	97.3523	99.3483	98.7437	97.9291	97.0394
2240	99.2	99.0366	97.7228	96.9184	97.4487	96.0952	98.4356	97.3574	99.3303	98.7448	97.923	97.0397
2240	99.2	99.0354	97.7535	96.927	97.4547	96.0882	98.4394	97.363	99.3112	98.7442	97.9164	97.0403
2240	99.2	99.0339	97.7875	96.9321	97.4608	96.0846	98.4432	97.3687	99.2941	98.7425	97.9094	97.0409
2240	99.2	99.0319	97.822	96.9331	97.4661	96.0854	98.4467	97.3743	99.2819	98.7403	97.902	97.0413
2240	99.2	99.0296	97.8543	96.9299	97.4696	96.091	98.4496	97.3795	99.2767	98.7382	97.8946	97.0414
2250	99.2	99.0269	97.8819	96.923	97.4709	96.1008	98.4519	97.3841	99.2798	98.7372	97.8873	97.041
2250	99.2	99.0239	97.9026	96.9132	97.4696	96.1135	98.4537	97.3881	99.2909	98.738	97.8802	97.04
2250	99.2	99.0206	97.915	96.9019	97.4658	96.127	98.4549	97.3915	99.3086	98.7411	97.8733	97.0386
2250	99.2	99.0169	97.9183	96.8902	97.4597	96.1392	98.4558	97.3943	99.3303	98.7466	97.8663	97.0368
2250	99.2	99.0127	97.9128	96.8796	97.452	96.1482	98.4564	97.3967	99.3529	98.7544	97.859	97.0347
2260	99.2	99.0078	97.8992	96.8712	97.4433	96.1521	98.4566	97.3987	99.3728	98.7638	97.8511	97.0326
2260	99.2	99.0024	97.8793	96.8658	97.4344	96.1504	98.4566	97.4004	99.3872	98.774	97.8422	97.0305
2260	99.2	98.9967	97.8552	96.8638	97.426	96.1429	98.4561	97.4021	99.3937	98.7837	97.8324	97.0284
2260	99.2	98.991	97.8294	96.865	97.4188	96.1308	98.4551	97.4038	99.3912	98.792	97.8217	97.0262
2260	99.2	98.9858	97.8046	96.869	97.4132	96.1158	98.4537	97.4057	99.3802	98.7976	97.81	97.0238
2270	99.2	98.9813	97.7835	96.8748	97.4093	96.1001	98.4519	97.4079	99.362	98.8	97.7976	97.0208
2270	99.2	98.9778	97.7681	96.8814	97.4071	96.0862	98.45	97.4105	99.3395	98.7987	97.7846	97.0175
2270	99.2	98.9756	97.7601	96.8876	97.4064	96.076	98.4483	97.4134	99.3161	98.7942	97.7713	97.0139
2270	99.2	98.9748	97.7606	96.8922	97.4066	96.071	98.4471	97.4164	99.2952	98.7871	97.7582	97.0103
2270	99.2	98.9751	97.7696	96.8946	97.4074	96.0718	98.4468	97.4194	99.28	98.7788	97.7455	97.007
2280	99.2	98.9761	97.7863	96.8942	97.4079	96.0778	98.4473	97.422	99.2726	98.7706	97.7335	97.0042
2280	99.2	98.9767	97.8091	96.8907	97.4075	96.0877	98.4483	97.424	99.274	98.764	97.7222	97.0019
2280	99.2	98.9754	97.8358	96.8843	97.4057	96.0992	98.4496	97.4251	99.2834	98.7604	97.7114	97.0001
2280	99.2	98.9707	97.8637	96.8758	97.402	96.11	98.4504	97.4253	99.2992	98.7608	97.7007	96.9984
2280	99.2	98.9607	97.8899	96.8658	97.3961	96.1177	98.45	97.4244	99.3184	98.7657	97.6895	96.9961
2290	99.2	98.9437	97.9116	96.8553	97.388	96.1201	98.4475	97.4222	99.3373	98.775	97.6771	96.9924
2290	99.2	98.9186	97.9265	96.8452	97.3777	96.116	98.4424	97.4186	99.3525	98.7877	97.663	96.9864
2290	99.2	98.8843	97.9332	96.8364	97.3655	96.1052	98.4343	97.4131	99.3609	98.803	97.6468	96.9777
2290	99.2	98.8408	97.9314	96.8299	97.3522	96.0887	98.4233	97.4051	99.3605	98.8193	97.6285	96.9659
2290	99.2	98.7883	97.9218	96.8262	97.3383	96.0681	98.4096	97.3942	99.3504	98.8354	97.6081	96.9513
2290	99.2	98.7277	97.9057	96.8255	97.3244	96.046	98.3936	97.3797	99.3313	98.8498	97.5859	96.9346
2300	99.2	98.6603	97.8857	96.8277	97.311	96.0247	98.3756	97.3611	99.305	98.8616	97.5625	96.9164
2300	99.2	98.5876	97.8645	96.832	97.2983	96.0068	98.356	97.3381	99.2742	98.8702	97.5384	96.8977
2300	99.2	98.5114	97.8451	96.8375	97.2861	95.9937	98.3349	97.3104	99.2418	98.8752	97.514	96.8788
2300	99.2	98.433	97.83	96.8429	97.2739	95.9863	98.3123	97.2779	99.2103	98.8768	97.4897	96.8602
2300	99.2	98.3537	97.8212	96.8468	97.2611	95.9841	98.2878	97.2405	99.1818	98.8753	97.4654	96.8415
2310	99.2	98.2737	97.8196	96.8473	97.2465	95.9857	98.2607	97.1979	99.1568	98.8711	97.4405	96.8222
2310	99.2	98.1934	97.8254	96.8428	97.2289	95.9887	98.2303	97.1496	99.1346	98.8649	97.4141	96.8016
2310	99.2	98.1131	97.8379	96.8325	97.2074	95.9907	98.1959	97.0947	99.1135	98.8573	97.3853	96.7787
2310	99.2	98.034	97.8567	96.8167	97.1818	95.9896	98.1572	97.0318	99.0907	98.849	97.3534	96.753
2310	99.2	97.957	97.8813	96.7966	97.1522	95.984	98.1142	96.9592	99.0623	98.8405	97.3177	96.7242
2320	99.2	97.8824	97.9102	96.7726	97.1181	95.9727	98.0662	96.8749	99.024	98.8313	97.2769	96.6916
2320	99.2	97.8096	97.9404	96.7441	97.0783	95.954	98.0119	96.7768	98.9708	98.8198	97.2294	96.6541
2320	99.1	97.7367	97.9677	96.709	97.0305	95.9266	97.9496	96.6642	98.8986	98.8034	97.1732	96.6102
2320	99.1	97.6619	97.9876	96.665	96.9724	95.8894	97.878	96.5386	98.8055	98.7796	97.107	96.5588
2320	99.1	97.5837	97.9961	96.6104	96.9027	95.8425	97.7971	96.4041	98.6925	98.7467	97.0305	96.4993
2330	99.1	97.5015	97.9903	96.5441	96.8211	95.7867	97.7082	96.2673	98.5644	98.7041	96.9448	96.4325
2330	99	97.4155	97.9687	96.4667	96.7292	95.7241	97.6144	96.1364	98.4283	98.6529	96.8527	96.3603
2330	99	97.3278	97.9318	96.3804	96.6303	95.6573	97.5199	96.0204	98.2939	98.5955	96.7586	96.2856
2330	98.9	97.2418	97.8816	96.2887	96.5291	95.5897	97.4299	95.9274	98.1712	98.5355	96.6676	96.2125
2330	98.9	97.1626	97.8226	96.1971	96.4319	95.5253	97.3498	95.8635	98.0702	98.4773	96.5855	96.1454
2340	98.8	97.0976	97.7625	96.1144	96.3472	95.4697	97.2859	95.8315	97.9991	98.4261	96.5188	96.0903
2340	98.8	97.0556	97.7124	96.0519	96.285	95.4299	97.244	95.8298	97.9629	98.3873	96.474	96.053
2340	98.8	97.0439	97.6841	96.0207	96.2537	95.4121	97.2275	95.851	97.9612	98.3643	96.455	96.0378
2340	98.8	97.0646	97.6859	96.0268	96.257	95.4193	97.2349	95.8821	97.9861	98.3564	96.4608	96.0449
2340	98.8	97.113	97.7199	96.0685	96.2911	95.4495	97.2589	95.9059	98.0229	98.3581	96.4849	96.0695
2350	98.9	97.1783	97.7816	96.1369	96.3463	95.4959	97.2884	95.9047	98.0528	98.3599	96.5164	96.1025
2350	98.9	97.245	97.8611	96.2174	96.4083	95.5488	97.3101	95.8644	98.0571	98.351	96.5419	96.1324
2350	98.9	97.2959	97.9446	96.2929	96.461	95.5968	97.3122	95.7772	98.0209	98.3218	96.5485	96.1477
2350	99	97.3139	98.0168	96.3456	96.4891	95.6288	97.2859	95.6435	97.9367	98.2658	96.5254	96.139
2350	99	97.2852	98.0624	96.3601	96.4804	95.6351	97.2268	95.472	97.805	98.1813	96.4661	96.1006
2350	98.9	97.202	98.0685	96.3251	96.4274	95.609	97.1359	95.2792	97.6349	98.0714	96.3698	96.0309
2360	98.8	97.0645	98.0266	96.2356	96.3289	95.5477	97.0194	95.0871	97.4431	97.9438	96.2416	95.9332
2360	98.7	96.8823	97.9344	96.0945	96.1909	95.4538	96.8885	94.9202	97.2514	97.8097	96.0919	95.8156
2360	98.6	96.6743	97.7978	95.9135	96.0269	95.3353	96.7586	94.8025	97.0846	97.6833	95.9364	95.6908
2360	98.5	96.4665	97.6308	95.7132	95.857	95.2059	96.6476	94.7539	96.9663	97.5801	95.7935	95.5748
2360	98.3	96.2879	97.4533	95.5184	95.7039	95.082	96.572	94.7864	96.915	97.5136	95.681	95.4836
2370	98.2	96.1648	97.2857	95.3526	95.5874	94.9789	96.5438	94.9023	96.9397	97.4924	95.6124	95.4298
2370	98.2	96.1167	97.1449	95.2334	95.5215	94.9078	96.5682	95.0939	97.0391	97.5181	95.5946	95.4202
2370	98.1	96.1544	97.0432	95.1714	95.5129	94.8749	96.6435	95.3457	97.2029	97.5863	95.6275	95.4556
2370	98.2	96.2803	96.9872	95.1704	95.5619	94.8823	96.7633	95.637	97.4141	97.6879	95.7057	95.5318
2370	98.2	96.4875	96.9787	95.2281	95.6631	94.9278	96.9177	95.9455	97.6531	97.8117	95.8194	95.6408
2380	98.3	96.7615	97.0142	95.3367	95.8064	95.0058	97.0949	96.2497	97.9001	97.946	95.9566	95.7728
2380	98.4	97.082	97.086	95.4844	95.9784	95.1077	97.2821	96.5309	98.1373	98.0804	96.1042	95.9168
2380	98.5	97.4252	97.1835	95.6566	96.1644	95.2236	97.4672	96.7751	98.3507	98.2063	96.2497	96.0621
2380	98.6	97.7675	97.2946	95.8381	96.3496	95.3432	97.6396	96.9741	98.5311	98.3173	96.383	96.1991
2380	98.8	98.0877	97.4076	96.0148	96.5213	95.4575	97.7914	97.1255	98.6744	98.41	96.4968	96.3204
2390	98.9	98.3696	97.5126	96.1756	96.6702	95.5594	97.9177	97.232	98.7811	98.4832	96.5873	96.4211
2390	99	98.603	97.603	96.3131	96.791	95.6448	98.0165	97.2999	98.8551	98.5382	96.6538	96.4999
2390	99	98.7838	97.6756	96.4238	96.8825	95.7125	98.0888	97.3379	98.9025	98.5778	96.6979	96.5577
2390	99.1	98.9131	97.73	96.5069	96.946	95.7629	98.1367	97.3546	98.9294	98.6049	96.7228	96.5967
2390	99.1	98.9959	97.7672	96.5634	96.9844	95.7974	98.1637	97.3579	98.9411	98.6221	96.7318	96.6198
2400	99.1	99.0398	97.7897	96.5954	97.0018	95.8182	98.1733	97.3541	98.9417	98.6313	96.7282	96.6299
2400	99.1	99.0542	97.801	96.6064	97.0029	95.828	98.1699	97.3477	98.9346	98.6342	96.7152	96.6299
2400	99.1	99.0484	97.8048	96.6008	96.9929	95.8297	98.1581	97.3415	98.9222	98.6324	96.6957	96.6228
2400	99.1	99.0308	97.8048	96.5835	96.9766	95.8263	98.1421	97.3366	98.9066	98.6272	96.6722	96.6113
2400	99.1	99.0081	97.804	96.559	96.9579	95.8199	98.1253	97.3329	98.8893	98.6201	96.6467	96.5977
2400	99.1	98.9851	97.8041	96.5314	96.9397	95.8122	98.1102	97.3294	98.8717	98.6124	96.6205	96.5836
2410	99.1	98.9648	97.8063	96.5042	96.9238	95.8044	98.0979	97.3252	98.8546	98.6052	96.5945	96.5703
2410	99.1	98.9487	97.8105	96.4801	96.911	95.797	98.0887	97.3194	98.8388	98.599	96.5692	96.5581
2410	99.1	98.9369	97.8161	96.4609	96.9013	95.7905	98.0819	97.312	98.825	98.5942	96.5447	96.5472
2410	99.1	98.9287	97.8218	96.4478	96.8942	95.7846	98.0763	97.3032	98.8133	98.5906	96.5208	96.5375
2410	99.1	98.9233	97.8263	96.4408	96.8887	95.7793	98.0706	97.2939	98.804	98.5879	96.4976	96.5286
2420	99	98.9197	97.8283	96.4394	96.8838	95.7743	98.0637	97.2852	98.7968	98.5858	96.4745	96.5204
2420	99	98.9171	97.827	96.4423	96.8788	95.7693	98.0552	97.2781	98.7912	98.5838	96.4516	96.5124
2420	99	98.9153	97.8219	96.4481	96.8729	95.7643	98.0451	97.2731	98.7865	98.5817	96.4286	96.5047
2420	99	98.9139	97.8132	96.455	96.8658	95.7594	98.034	97.2703	98.7819	98.5794	96.4056	96.4971
2420	99	98.9129	97.8015	96.4612	96.8574	95.7546	98.023	97.2691	98.7763	98.5767	96.3827	96.4896
2430	99	98.9122	97.7876	96.4652	96.8481	95.7504	98.0129	97.2684	98.7689	98.574	96.3599	96.4824
2430	99	98.9119	97.773	96.4657	96.8379	95.7468	98.0042	97.2672	98.7585	98.5715	96.3374	96.4753
2430	99	98.9119	97.759	96.4618	96.8273	95.7442	97.9973	97.2643	98.7447	98.5693	96.3151	96.4683
2430	99	98.9121	97.7469	96.4535	96.8166	95.7426	97.9918	97.2593	98.7272	98.5677	96.293	96.4613
2430	99	98.9125	97.738	96.4411	96.8062	95.7419	97.987	97.2523	98.7064	98.5669	96.2711	96.4541
2440	99	98.9127	97.7334	96.4255	96.7961	95.7421	97.9819	97.2437	98.6832	98.5668	96.2492	96.4467
2440	99	98.9124	97.7336	96.4081	96.7866	95.7426	97.9758	97.2347	98.659	98.5674	96.2271	96.4389
2440	99	98.9115	97.7388	96.3904	96.7776	95.743	97.968	97.2261	98.6353	98.5684	96.2048	96.4309
2440	99	98.9099	97.7488	96.3738	96.7691	95.7427	97.9583	97.2189	98.6138	98.5694	96.1823	96.4225
2440	99	98.9077	97.7627	96.3597	96.7607	95.7411	97.9471	97.2136	98.596	98.5698	96.1596	96.4141
2450	99	98.905	97.7793	96.3489	96.7525	95.7377	97.9351	97.2102	98.5827	98.5693	96.1368	96.4057
2450	99	98.9018	97.797	96.3419	96.744	95.7324	97.9232	97.2083	98.5742	98.5672	96.1138	96.3975
2450	99	98.8979	97.8141	96.3386	96.7352	95.7251	97.9122	97.2071	98.5702	98.5633	96.0906	96.3896
2450	99	98.8935	97.8289	96.3385	96.7261	95.7164	97.9026	97.2058	98.5695	98.5575	96.0673	96.382
2450	99	98.8887	97.8398	96.3405	96.7166	95.7068	97.8945	97.2036	98.5703	98.5498	96.044	96.3745
2450	99	98.8836	97.8457	96.3436	96.707	95.6973	97.8878	97.2002	98.5705	98.5406	96.0207	96.3672
2460	99	98.8786	97.8459	96.3465	96.6974	95.6887	97.8818	97.1955	98.5681	98.5304	95.9975	96.3599
2460	99	98.8736	97.8402	96.3479	96.688	95.682	97.8758	97.1897	98.5613	98.52	95.9745	96.3526
2460	98.9	98.8688	97.8291	96.3471	96.679	95.6775	97.8689	97.1835	98.5488	98.5104	95.9519	96.3453
2460	98.9	98.864	97.8137	96.3434	96.6706	95.6758	97.8608	97.1773	98.5304	98.5023	95.9297	96.338
2460	98.9	98.8593	97.7954	96.3366	96.6627	95.6765	97.8512	97.1717	98.5066	98.4965	95.908	96.3308
2470	98.9	98.8549	97.776	96.327	96.6554	95.6792	97.8404	97.167	98.4788	98.4936	95.8867	96.3238
2470	98.9	98.8511	97.7575	96.3151	96.6486	95.6832	97.829	97.1633	98.4491	98.4939	95.8657	96.3171
2470	98.9	98.8478	97.7416	96.3017	96.6422	95.6872	97.8176	97.1605	98.4199	98.4972	95.8452	96.3105
2470	98.9	98.845	97.7301	96.2879	96.636	95.6903	97.807	97.1581	98.3937	98.5032	95.8248	96.304
2470	98.9	98.8424	97.7242	96.2746	96.6297	95.6914	97.7975	97.1556	98.3726	98.5109	95.8045	96.2974
2480	98.9	98.8399	97.7245	96.2626	96.6233	95.69	97.7893	97.1528	98.3579	98.5195	95.7842	96.2906
2480	98.9	98.8375	97.731	96.2526	96.6165	95.6858	97.7822	97.1492	98.3499	98.5278	95.7637	96.2834
2480	98.9	98.8352	97.7433	96.2447	96.6093	95.6789	97.7759	97.1445	98.3479	98.5347	95.7429	96.2757
2480	98.9	98.8329	97.7603	96.2391	96.6017	95.67	97.7697	97.1388	98.3503	98.5391	95.7218	96.2675
2480	98.9	98.8304	97.7804	96.2355	96.5935	95.6601	97.7631	97.1324	98.3547	98.5403	95.7004	96.259
2490	98.9	98.8276	97.8017	96.2335	96.585	95.6503	97.7559	97.1256	98.3581	98.5378	95.6787	96.2506
2490	98.9	98.8243	97.8223	96.2326	96.5761	95.6418	97.7479	97.119	98.358	98.5316	95.657	96.2424
2490	98.9	98.8205	97.8401	96.232	96.567	95.6355	97.7391	97.1131	98.352	98.5221	95.6353	96.2346
2490	98.9	98.8165	97.8535	96.2312	96.5579	95.6324	97.73	97.1082	98.3387	98.5099	95.6137	96.2276
2490	98.9	98.8124	97.8613	96.2298	96.5489	95.6324	97.7208	97.1048	98.3177	98.4961	95.5923	96.2211
2500	98.9	98.8083	97.8628	96.2275	96.54	95.6355	97.7119	97.1028	98.29	98.482	95.5712	96.2152
2500	98.9	98.8041	97.8579	96.2238	96.5315	95.6408	97.7035	97.102	98.2576	98.469	95.5504	96.2095
2500	98.9	98.7999	97.8471	96.2189	96.5235	95.647	97.6956	97.1019	98.2232	98.4581	95.5301	96.2039
2500	98.9	98.7957	97.8316	96.2126	96.5159	95.653	97.6882	97.102	98.1901	98.4506	95.5103	96.1981
2500	98.9	98.7917	97.813	96.2053	96.509	95.6573	97.6812	97.1015	98.1613	98.4469	95.4908	96.1919
2510	98.9	98.788	97.7931	96.1971	96.5027	95.6589	97.6741	97.1001	98.1394	98.4473	95.4717	96.1852
2510	98.9	98.7846	97.7739	96.1882	96.4971	95.6572	97.667	97.0974	98.126	98.4517	95.4529	96.1782
2510	98.9	98.7815	97.7573	96.179	96.4922	95.652	97.6597	97.0936	98.1211	98.4595	95.4343	96.171
2510	98.9	98.7784	97.7448	96.17	96.488	95.6437	97.6523	97.0889	98.1239	98.4697	95.4159	96.1638
2510	98.9	98.7753	97.7375	96.1614	96.4843	95.6332	97.6448	97.0839	98.1321	98.481	95.3976	96.1568
2510	98.9	98.772	97.7358	96.1537	96.481	95.6219	97.6373	97.0794	98.1426	98.4921	95.3794	96.1503
2520	98.9	98.7687	97.7398	96.1471	96.4777	95.6111	97.63	97.0759	98.152	98.5016	95.3613	96.1441
2520	98.9	98.7653	97.7489	96.1419	96.4743	95.6022	97.6228	97.0737	98.1569	98.5085	95.3432	96.1384
2520	98.8	98.7618	97.762	96.1381	96.4702	95.5962	97.6158	97.0726	98.1547	98.5121	95.3249	96.1331
2520	98.8	98.7581	97.7778	96.1356	96.4653	95.5938	97.609	97.0721	98.1438	98.5119	95.3065	96.1279
2520	98.8	98.7541	97.7945	96.1345	96.4593	95.5948	97.6023	97.0713	98.1238	98.508	95.2878	96.1229
2530	98.8	98.75	97.8106	96.1342	96.4521	95.5987	97.5957	97.0692	98.0956	98.5009	95.269	96.1178
2530	98.8	98.7458	97.8247	96.1344	96.4437	95.6046	97.5891	97.0652	98.0614	98.4913	95.2499	96.1126
2530	98.8	98.7417	97.8353	96.1346	96.4344	95.611	97.5825	97.0588	98.0241	98.4801	95.2305	96.1071
2530	98.8	98.7377	97.8417	96.1342	96.4246	95.6165	97.5761	97.0503	97.9872	98.4684	95.2108	96.1012
2530	98.8	98.7338	97.8435	96.1327	96.4148	95.6198	97.5697	97.0404	97.9536	98.4571	95.1907	96.0952
2540	98.8	98.7297	97.8405	96.1297	96.4056	95.6198	97.5633	97.0301	97.926	98.4472	95.1704	96.0889
2540	98.8	98.7256	97.8333	96.125	96.3974	95.616	97.5568	97.0204	97.9059	98.4391	95.1498	96.0825
2540	98.8	98.7213	97.8226	96.1184	96.3906	95.6086	97.5501	97.0124	97.8935	98.4331	95.1291	96.0762
2540	98.8	98.7171	97.8093	96.1102	96.3854	95.5981	97.5431	97.0065	97.8882	98.4292	95.1085	96.07
2540	98.8	98.7128	97.7948	96.1005	96.3817	95.5858	97.5356	97.0028	97.888	98.4271	95.0879	96.064
2550	98.8	98.7086	97.7802	96.0901	96.3792	95.573	97.5278	97.0007	97.8902	98.4265	95.0676	96.0582
2550	98.8	98.7042	97.7668	96.0795	96.3772	95.5614	97.5197	96.9992	97.8921	98.4267	95.0475	96.0526
2550	98.8	98.6998	97.7555	96.0695	96.3752	95.5521	97.5118	96.9972	97.8907	98.4274	95.0277	96.0472
2550	98.7	98.6955	97.7472	96.0608	96.3723	95.5462	97.5042	96.9938	97.884	98.4281	95.0083	96.0419
2550	98.7	98.6914	97.7423	96.054	96.3679	95.5441	97.4971	96.9886	97.8705	98.4283	94.9891	96.0366
2560	98.7	98.6875	97.7409	96.0494	96.3615	95.5453	97.4908	96.9818	97.8501	98.428	94.9701	96.0314
2560	98.7	98.6838	97.743	96.047	96.3529	95.5493	97.4852	96.974	97.8237	98.4271	94.9511	96.0263
2560	98.7	98.68	97.748	96.0466	96.3424	95.5545	97.4801	96.9665	97.793	98.4257	94.9319	96.0214
2560	98.7	98.6762	97.7552	96.0475	96.3302	95.5596	97.475	96.9601	97.7603	98.424	94.912	96.0169
2560	98.7	98.6723	97.7639	96.049	96.3171	95.5631	97.4698	96.9557	97.7284	98.4222	94.8914	96.0129
2560	98.7	98.6683	97.7732	96.0501	96.3039	95.5638	97.4638	96.9535	97.6997	98.4204	94.87	96.0094
2570	98.7	98.6644	97.7821	96.0499	96.2913	95.5611	97.457	96.9531	97.6763	98.4188	94.8477	96.0063
2570	98.7	98.6605	97.79	96.0477	96.2801	95.5548	97.4495	96.9538	97.6592	98.4172	94.8245	96.0033
2570	98.7	98.6566	97.7963	96.0429	96.2708	95.5454	97.4415	96.9544	97.6486	98.4155	94.8007	96.0001
2570	98.7	98.6525	97.8006	96.0353	96.2637	95.534	97.4335	96.9537	97.6438	98.4135	94.7764	95.9964
2570	98.7	98.6484	97.8027	96.0251	96.2585	95.5219	97.426	96.951	97.643	98.4111	94.7518	95.9918
2580	98.7	98.6444	97.8027	96.013	96.2549	95.5107	97.4191	96.946	97.6441	98.4079	94.727	95.9863
2580	98.7	98.6406	97.8006	95.9997	96.2521	95.5016	97.413	96.939	97.6446	98.4039	94.7022	95.98
2580	98.7	98.6368	97.7969	95.9864	96.2492	95.4956	97.4076	96.9307	97.6423	98.3988	94.6774	95.9731
2580	98.7	98.633	97.7917	95.974	96.2454	95.493	97.4023	96.9223	97.6353	98.3929	94.6527	95.9661
2580	98.7	98.6288	97.7856	95.9635	96.2399	95.4937	97.3965	96.9146	97.6226	98.3861	94.6279	95.9595
2590	98.7	98.6243	97.7786	95.9556	96.2322	95.4969	97.3897	96.9083	97.6038	98.3789	94.603	95.9535
2590	98.7	98.6195	97.7712	95.9506	96.2221	95.5013	97.3815	96.9034	97.5797	98.3715	94.5778	95.9484
2590	98.7	98.6144	97.7636	95.9482	96.2099	95.5056	97.3717	96.8997	97.5516	98.3646	94.5522	95.9439
2590	98.7	98.6091	97.7561	95.9479	96.1958	95.5084	97.3606	96.8964	97.5213	98.3585	94.5262	95.9398
2590	98.7	98.6037	97.7486	95.9489	96.1808	95.5085	97.3488	96.8928	97.4908	98.3536	94.4998	95.9356
2600	98.7	98.5982	97.7416	95.95	96.1655	95.5052	97.3372	96.8881	97.4622	98.3504	94.4731	95.9308
2600	98.7	98.5927	97.7353	95.9501	96.1508	95.4983	97.3264	96.8822	97.437	98.3491	94.4461	95.9253
2600	98.6	98.5873	97.7299	95.948	96.1373	95.4883	97.3171	96.8751	97.4162	98.3497	94.4189	95.9188
2600	98.6	98.5823	97.7259	95.943	96.1256	95.4761	97.3093	96.8676	97.4	98.3523	94.3914	95.9115
2600	98.6	98.5778	97.7236	95.9347	96.1155	95.4629	97.3027	96.8603	97.3881	98.3563	94.3634	95.9037
2610	98.6	98.5738	97.7232	95.9233	96.1071	95.4504	97.2966	96.8539	97.3795	98.3613	94.3349	95.8959
2610	98.6	98.57	97.725	95.9091	96.0996	95.4397	97.2902	96.8488	97.3725	98.3665	94.3058	95.8883
2610	98.6	98.5662	97.7289	95.8933	96.0925	95.4319	97.2825	96.8451	97.3657	98.3711	94.276	95.8813
2610	98.6	98.5621	97.7348	95.8771	96.0849	95.4274	97.2728	96.8424	97.3575	98.3743	94.2454	95.8749
2610	98.6	98.5578	97.7424	95.8617	96.0763	95.4262	97.261	96.8403	97.3469	98.3756	94.2139	95.8687
2620	98.6	98.553	97.7512	95.8484	96.066	95.4276	97.2474	96.838	97.3332	98.3745	94.1815	95.8623
2620	98.6	98.5478	97.7603	95.8381	96.0537	95.4304	97.2327	96.835	97.3162	98.3709	94.1481	95.8554
2620	98.6	98.542	97.7689	95.8313	96.0396	95.4333	97.2177	96.8311	97.2962	98.3648	94.114	95.8477
2620	98.6	98.5355	97.7761	95.828	96.0238	95.4347	97.2035	96.8261	97.274	98.3565	94.0793	95.8391
2620	98.6	98.5284	97.781	95.8276	96.0071	95.4334	97.1907	96.8206	97.2505	98.3468	94.0443	95.8298
2620	98.6	98.5209	97.7829	95.8291	95.9899	95.4286	97.1795	96.815	97.2267	98.3365	94.0093	95.8201
2630	98.6	98.5134	97.7813	95.8312	95.973	95.4199	97.1697	96.8097	97.2035	98.3264	93.9743	95.8106
2630	98.6	98.5059	97.776	95.8324	95.957	95.4079	97.1607	96.8048	97.1814	98.3174	93.9395	95.8015
2630	98.6	98.4986	97.767	95.8316	95.9421	95.3935	97.1515	96.7999	97.1606	98.3099	93.9049	95.7932
2630	98.6	98.4913	97.7548	95.8277	95.9285	95.378	97.1413	96.7944	97.1409	98.3043	93.8705	95.7856
2630	98.6	98.484	97.7402	95.8203	95.916	95.3629	97.1295	96.7875	97.1218	98.301	93.8362	95.7787
2640	98.6	98.4768	97.7242	95.8093	95.9043	95.3498	97.1158	96.7786	97.1029	98.2997	93.8022	95.772
2640	98.6	98.4699	97.7083	95.7952	95.8928	95.3397	97.1005	96.7673	97.0834	98.3005	93.7684	95.7649
2640	98.6	98.4632	97.6938	95.7791	95.8809	95.3333	97.0844	96.7539	97.0629	98.3029	93.7347	95.7572
2640	98.6	98.4565	97.6818	95.7621	95.868	95.3305	97.0683	96.7387	97.0409	98.3063	93.7009	95.7486
2640	98.5	98.4497	97.6736	95.7456	95.8538	95.3307	97.0532	96.7227	97.017	98.3099	93.6669	95.7391
2650	98.5	98.4425	97.6697	95.731	95.838	95.3326	97.0395	96.7065	96.991	98.3131	93.6325	95.729
2650	98.5	98.435	97.6706	95.7191	95.8206	95.3347	97.0275	96.6911	96.9629	98.3152	93.5978	95.7187
2650	98.5	98.4273	97.6762	95.7105	95.802	95.3355	97.0169	96.6771	96.933	98.3156	93.5627	95.7087
2650	98.5	98.4195	97.6859	95.7051	95.7827	95.3335	97.0069	96.6648	96.9018	98.3143	93.5272	95.6993
2650	98.5	98.4117	97.6988	95.7023	95.7631	95.3279	96.9968	96.6543	96.87	98.3109	93.4912	95.6906
2660	98.5	98.4037	97.7133	95.7011	95.7439	95.3184	96.9856	96.645	96.8384	98.3058	93.4548	95.6827
2660	98.5	98.3954	97.7281	95.7005	95.7256	95.3054	96.973	96.6368	96.8075	98.2991	93.418	95.6753
2660	98.5	98.3872	97.7416	95.6991	95.7086	95.2898	96.9588	96.6292	96.7782	98.2916	93.381	95.668
2660	98.5	98.3791	97.7524	95.6957	95.693	95.2732	96.9433	96.6225	96.7511	98.2842	93.3439	95.6602
2660	98.5	98.3715	97.7593	95.6894	95.6789	95.2574	96.9274	96.6168	96.7269	98.2776	93.307	95.6517
2670	98.5	98.3644	97.7616	95.6799	95.666	95.2438	96.9116	96.6127	96.7056	98.2725	93.2705	95.6422
2670	98.5	98.3576	97.7588	95.6672	95.6539	95.234	96.8969	96.6102	96.6871	98.2695	93.2345	95.6319
2670	98.5	98.351	97.7509	95.6518	95.6422	95.2284	96.8835	96.6091	96.6706	98.2685	93.199	95.6208
2670	98.5	98.3443	97.7385	95.6349	95.6303	95.2271	96.8715	96.6086	96.6549	98.2691	93.1639	95.6094
2670	98.5	98.3376	97.7226	95.6176	95.6177	95.2292	96.8604	96.6075	96.6387	98.2708	93.1291	95.5981
2670	98.5	98.3311	97.7043	95.6013	95.6042	95.2334	96.8495	96.6045	96.6205	98.2728	93.0947	95.5871
2680	98.5	98.3246	97.6853	95.5869	95.5895	95.2378	96.8379	96.5981	96.5993	98.2744	93.0605	95.5766
2680	98.5	98.3179	97.6672	95.5753	95.5735	95.2406	96.8249	96.5874	96.5745	98.275	93.0267	95.5665
2680	98.4	98.3109	97.6516	95.5668	95.5562	95.24	96.8102	96.572	96.5457	98.2742	92.9934	95.5568
2680	98.4	98.3034	97.6396	95.5613	95.5379	95.2349	96.7937	96.5523	96.513	98.272	92.9608	95.5471
2680	98.4	98.2954	97.6326	95.558	95.5189	95.2248	96.7759	96.5294	96.477	98.2684	92.929	95.5374
2690	98.4	98.2873	97.631	95.5562	95.4993	95.2099	96.7575	96.5049	96.4387	98.264	92.8982	95.5274
2690	98.4	98.2793	97.635	95.5545	95.4795	95.1912	96.7392	96.4807	96.3992	98.2591	92.8684	95.5172
2690	98.4	98.2712	97.644	95.5519	95.4598	95.1704	96.7218	96.4583	96.3597	98.2543	92.8396	95.507
2690	98.4	98.2631	97.6572	95.5472	95.4404	95.1494	96.7056	96.4388	96.3211	98.2497	92.8116	95.4967
2690	98.4	98.2547	97.6729	95.5398	95.4214	95.1302	96.6906	96.4225	96.284	98.2454	92.7842	95.4867
2700	98.4	98.2461	97.6894	95.5297	95.403	95.1144	96.6763	96.4092	96.2487	98.2411	92.7571	95.4769
2700	98.3	98.2377	97.7048	95.5169	95.3853	95.1032	96.6624	96.3978	96.2155	98.2366	92.7299	95.4673
2700	98.3	98.2296	97.7173	95.5022	95.3686	95.0971	96.6483	96.3875	96.1847	98.2316	92.7019	95.4577
2700	98.3	98.222	97.7254	95.4867	95.353	95.0958	96.6333	96.3772	96.1562	98.2262	92.673	95.4478
2700	98.3	98.2148	97.728	95.4714	95.3387	95.0983	96.6175	96.3666	96.1304	98.2203	92.6427	95.4374
2710	98.3	98.2078	97.7247	95.4573	95.3256	95.103	96.6009	96.3555	96.107	98.2142	92.6112	95.4263
2710	98.3	98.201	97.7155	95.4455	95.3139	95.108	96.5838	96.3446	96.0859	98.2084	92.5783	95.4143
2710	98.3	98.1945	97.7013	95.4363	95.3031	95.1116	96.5668	96.3347	96.067	98.2035	92.5444	95.4016
2710	98.3	98.1886	97.6834	95.4299	95.293	95.1122	96.5505	96.3268	96.0498	98.2	92.5096	95.3885
2710	98.3	98.1831	97.6635	95.4259	95.2831	95.1088	96.5351	96.3214	96.0335	98.1983	92.4739	95.3754
2720	98.3	98.1779	97.6434	95.4235	95.2725	95.101	96.5208	96.3181	96.0168	98.1983	92.4376	95.3628
2720	98.3	98.1724	97.6248	95.4219	95.2606	95.089	96.5074	96.3161	95.998	98.1994	92.4006	95.3511
2720	98.3	98.1665	97.6092	95.42	95.2467	95.0737	96.4946	96.3141	95.9756	98.2011	92.3634	95.3405
2720	98.3	98.1599	97.5979	95.4167	95.2304	95.0566	96.482	96.3108	95.9488	98.2026	92.3262	95.331
2720	98.3	98.1529	97.5917	95.4113	95.2118	95.0394	96.4694	96.3052	95.9173	98.2034	92.2892	95.3225
2720	98.3	98.1456	97.5909	95.4034	95.1912	95.0238	96.4566	96.2968	95.8818	98.2032	92.2526	95.3146
2730	98.3	98.1381	97.5951	95.393	95.1693	95.0111	96.4438	96.2856	95.8435	98.2019	92.2167	95.307
2730	98.3	98.1304	97.6038	95.3806	95.1474	95.0023	96.4311	96.2719	95.8042	98.1996	92.1817	95.2994
2730	98.3	98.1226	97.6158	95.3669	95.1265	94.9974	96.419	96.2568	95.7659	98.1966	92.1476	95.2914
2730	98.3	98.1147	97.6298	95.353	95.1079	94.9962	96.4077	96.2419	95.7308	98.1935	92.1146	95.283
2730	98.3	98.1072	97.6443	95.3397	95.0927	94.9977	96.3975	96.229	95.701	98.1911	92.083	95.2742
2740	98.3	98.1004	97.6579	95.3281	95.0816	95.0006	96.3884	96.2196	95.6779	98.1899	92.0525	95.265
2740	98.3	98.0945	97.6695	95.3186	95.0746	95.0034	96.3801	96.214	95.6616	98.1901	92.0228	95.2557
2740	98.3	98.0891	97.6776	95.3117	95.0711	95.0044	96.3722	96.2116	95.6505	98.1912	91.9936	95.2465
2740	98.3	98.0839	97.6815	95.3071	95.0697	95.0024	96.3641	96.2108	95.6421	98.1922	91.9643	95.2375
2740	98.3	98.0785	97.6806	95.3044	95.0689	94.9966	96.3553	96.21	95.6336	98.192	91.9345	95.2287
2750	98.3	98.0728	97.675	95.3028	95.0668	94.9868	96.3456	96.2078	95.6219	98.19	91.9037	95.2202
2750	98.3	98.0667	97.665	95.3012	95.0614	94.9736	96.335	96.203	95.6051	98.1858	91.8719	95.2119
2750	98.3	98.0604	97.6517	95.2987	95.0513	94.9582	96.3235	96.1954	95.5816	98.1795	91.8388	95.2035
2750	98.3	98.0537	97.6363	95.2945	95.0357	94.9418	96.3117	96.185	95.5514	98.1715	91.8045	95.195
2750	98.2	98.0465	97.6201	95.288	95.0143	94.9262	96.2996	96.172	95.5149	98.1624	91.769	95.1863
2760	98.2	98.0386	97.6043	95.279	94.9878	94.9124	96.2876	96.1575	95.4737	98.1529	91.7324	95.1774
2760	98.2	98.0303	97.5903	95.2678	94.9574	94.9017	96.2756	96.1426	95.4304	98.144	91.6949	95.1682
2760	98.2	98.022	97.5792	95.2548	94.9253	94.8943	96.2637	96.129	95.3877	98.137	91.6568	95.1587
2760	98.2	98.0139	97.5718	95.2408	94.8936	94.8905	96.2517	96.1179	95.3487	98.1328	91.6181	95.1489
2760	98.2	98.0062	97.5686	95.2265	94.8645	94.8894	96.2393	96.11	95.3152	98.1315	91.579	95.1387
2770	98.2	97.9987	97.5692	95.2129	94.8398	94.8899	96.2263	96.1045	95.2878	98.1326	91.5395	95.1282
2770	98.2	97.9911	97.5732	95.2005	94.8204	94.8905	96.2124	96.1004	95.2659	98.1351	91.4992	95.1176
2770	98.2	97.9833	97.5797	95.1896	94.8067	94.8899	96.1977	96.0968	95.2484	98.138	91.4579	95.1066
2770	98.2	97.9753	97.5879	95.1802	94.798	94.887	96.1825	96.0927	95.2337	98.1406	91.4157	95.0954
2770	98.2	97.9673	97.5969	95.172	94.7929	94.8813	96.1671	96.0879	95.2202	98.1427	91.3723	95.0837
2780	98.2	97.9593	97.6059	95.1645	94.7895	94.8729	96.1518	96.0823	95.2064	98.144	91.3279	95.0717
2780	98.2	97.9511	97.6141	95.1569	94.7855	94.8623	96.1367	96.0761	95.1908	98.1447	91.2822	95.0591
2780	98.2	97.9427	97.6209	95.1485	94.7786	94.8503	96.1218	96.0694	95.1722	98.145	91.2354	95.0462
2780	98.2	97.9338	97.6257	95.1387	94.7669	94.838	96.1066	96.0625	95.1494	98.145	91.1873	95.0327
2780	98.2	97.9247	97.6281	95.1271	94.749	94.8264	96.0907	96.0555	95.1222	98.1449	91.1376	95.0186
2780	98.2	97.9155	97.6281	95.1136	94.7247	94.8162	96.0733	96.0489	95.0907	98.1451	91.0863	95.004
2790	98.2	97.9063	97.6257	95.0984	94.6944	94.8081	96.054	96.0429	95.0557	98.1456	91.0331	94.9888
2790	98.2	97.897	97.6211	95.0819	94.6593	94.8021	96.0323	96.0368	95.0176	98.1462	90.9778	94.9732
2790	98.2	97.8872	97.6144	95.0649	94.6214	94.7974	96.0081	96.0292	94.9767	98.146	90.9199	94.957
2790	98.2	97.8767	97.6058	95.0479	94.5824	94.7933	95.9813	96.0187	94.933	98.1443	90.8591	94.9405
2790	98.2	97.8652	97.5956	95.0316	94.5446	94.7885	95.9522	96.004	94.8872	98.1405	90.7949	94.9236
2800	98.2	97.8529	97.5845	95.0165	94.5096	94.7823	95.9214	95.9846	94.8398	98.1343	90.7271	94.906
2800	98.2	97.8398	97.5729	95.0026	94.4785	94.7739	95.8893	95.9602	94.7915	98.126	90.6555	94.8877
2800	98.2	97.826	97.5614	94.9899	94.4517	94.7629	95.8564	95.931	94.7425	98.1157	90.5799	94.8685
2800	98.1	97.8114	97.5505	94.9779	94.4284	94.7494	95.8228	95.8975	94.6926	98.1037	90.5002	94.8482
2800	98.1	97.7957	97.5404	94.9658	94.4071	94.7337	95.7882	95.8603	94.6409	98.0901	90.4161	94.8267
2810	98.1	97.779	97.5312	94.9528	94.386	94.7163	95.7524	95.8204	94.5864	98.0751	90.327	94.8041
2810	98.1	97.7616	97.523	94.9382	94.3628	94.6983	95.7149	95.7789	94.528	98.059	90.2323	94.7803
2810	98.1	97.7436	97.516	94.9214	94.3356	94.6807	95.6757	95.7374	94.4652	98.0425	90.1314	94.7555
2810	98	97.7253	97.51	94.9018	94.3029	94.6643	95.6345	95.6973	94.398	98.0262	90.0237	94.7301
2810	98	97.7068	97.5052	94.8796	94.264	94.6499	95.5916	95.6593	94.327	98.0108	89.9092	94.7043
2820	98	97.6885	97.5014	94.855	94.219	94.6378	95.5472	95.6237	94.2539	97.9967	89.7881	94.6781
2820	98	97.6707	97.4988	94.8287	94.1689	94.6277	95.5019	95.5904	94.1807	97.9844	89.6608	94.6518
2820	98	97.6537	97.4972	94.8015	94.1152	94.6194	95.456	95.5596	94.11	97.9748	89.5276	94.6251
2820	98	97.6377	97.4967	94.7743	94.0598	94.6122	95.4099	95.5312	94.0434	97.9687	89.3873	94.5976
2820	98	97.6223	97.4971	94.7477	94.0043	94.6052	95.3634	95.5053	93.9807	97.9663	89.2363	94.5686
2830	97.9	97.6065	97.4978	94.722	93.9489	94.5974	95.3156	95.4811	93.9187	97.9674	89.0672	94.5371
2830	97.9	97.5884	97.4979	94.6968	93.8927	94.5875	95.2652	95.4571	93.8512	97.9706	88.8679	94.5019
2830	97.9	97.5657	97.4958	94.6712	93.8331	94.574	95.2101	95.4313	93.7691	97.9739	88.6222	94.4615
2830	97.9	97.5358	97.4901	94.644	93.7659	94.5559	95.1479	95.4016	93.6618	97.975	88.3106	94.4145
2830	97.9	97.4965	97.4793	94.6135	93.6864	94.5324	95.0765	95.366	93.519	97.9718	87.9133	94.3592
2830	97.9	97.446	97.4622	94.5778	93.5894	94.5032	94.994	95.3232	93.3327	97.9627	87.4134	94.2944
2840	97.9	97.3834	97.4382	94.5355	93.4705	94.4685	94.8994	95.2718	93.0982	97.9468	86.8012	94.2193
2840	97.8	97.3093	97.4071	94.4856	93.3269	94.4289	94.7923	95.2105	92.8169	97.9234	86.0777	94.1336
2840	97.8	97.2261	97.3698	94.4277	93.1584	94.3854	94.6737	95.1388	92.4966	97.893	85.2574	94.038
2840	97.7	97.1378	97.3278	94.3628	92.9679	94.3393	94.5456	95.0572	92.1522	97.8569	84.3692	93.9342
2840	97.7	97.0497	97.2837	94.2926	92.7614	94.2927	94.4111	94.9677	91.8034	97.8177	83.4548	93.825
2850	97.6	96.9675	97.2405	94.2194	92.5474	94.2473	94.2737	94.8739	91.4714	97.7785	82.5641	93.7139
2850	97.5	96.8966	97.2013	94.1462	92.336	94.2052	94.1372	94.7796	91.1764	97.7425	81.7495	93.6049
2850	97.5	96.8411	97.1688	94.0758	92.1371	94.1675	94.0049	94.6887	90.934	97.7122	81.0591	93.5021
2850	97.5	96.8033	97.1449	94.0105	91.9596	94.1351	93.8794	94.6045	90.7536	97.6889	80.5312	93.4092
2850	97.4	96.7836	97.1308	93.9519	91.8097	94.1084	93.7621	94.5292	90.6373	97.6731	80.1898	93.329
2860	97.4	96.7803	97.1262	93.9007	91.6908	94.087	93.6534	94.4641	90.5804	97.6642	80.0423	93.2631
2860	97.4	96.7904	97.1305	93.8564	91.6027	94.0702	93.5529	94.4092	90.5719	97.6609	80.0796	93.2117
2860	97.4	96.8093	97.1416	93.8175	91.5423	94.0572	93.4594	94.3638	90.597	97.6618	80.2772	93.1736
2860	97.4	96.8318	97.1572	93.7821	91.5037	94.047	93.3711	94.3255	90.6386	97.6646	80.5991	93.1468
2860	97.4	96.8531	97.1743	93.7478	91.4794	94.0383	93.2857	94.2906	90.68	97.6665	81.0022	93.1284
2870	97.4	96.8692	97.1898	93.7123	91.4617	94.0302	93.2014	94.2547	90.7076	97.665	81.4414	93.1152
2870	97.4	96.8778	97.2012	93.6742	91.4437	94.0218	93.1166	94.2144	90.7134	97.6583	81.875	93.1044
2870	97.4	96.8779	97.2069	93.6325	91.4203	94.0129	93.0306	94.1678	90.6944	97.6459	82.2693	93.0936
2870	97.4	96.8699	97.2059	93.5872	91.3887	94.0035	92.9433	94.1145	90.6519	97.6281	82.6005	93.0813
2870	97.4	96.855	97.1984	93.5393	91.3482	93.9936	92.8551	94.0558	90.5901	97.6065	82.8553	93.0666
2880	97.3	96.8347	97.1848	93.4901	91.3001	93.9834	92.7668	93.9935	90.5141	97.5828	83.0295	93.0492
2880	97.3	96.8105	97.1666	93.4413	91.2468	93.9727	92.6792	93.93	90.429	97.5587	83.1257	93.0293
2880	97.3	96.784	97.1451	93.3947	91.1915	93.9612	92.593	93.8677	90.339	97.536	83.1505	93.0071
2880	97.2	96.7564	97.1223	93.3518	91.1372	93.9486	92.5092	93.8088	90.2477	97.5162	83.1124	92.9828
2880	97.2	96.7288	97.1002	93.3136	91.0869	93.9348	92.4285	93.755	90.1575	97.5006	83.0202	92.9565
2890	97.2	96.7018	97.0805	93.2806	91.0424	93.9194	92.3516	93.7077	90.0699	97.4898	82.8821	92.9282
2890	97.1	96.6756	97.0648	93.2528	91.0046	93.9026	92.279	93.6669	89.9852	97.4838	82.7054	92.8976
2890	97.1	96.6499	97.0539	93.2294	90.9735	93.8843	92.2111	93.6322	89.9025	97.4817	82.4961	92.8648
2890	97.1	96.6243	97.0482	93.2094	90.9479	93.865	92.148	93.6029	89.8201	97.4823	82.2589	92.8298
2890	97.1	96.5979	97.0476	93.1913	90.9259	93.845	92.09	93.5788	89.7353	97.4844	81.9963	92.7927
2890	97.1	96.5693	97.0513	93.1735	90.9048	93.8252	92.0374	93.56	89.6445	97.4871	81.7091	92.7539
2900	97	96.537	97.0583	93.1546	90.8816	93.8061	91.9899	93.5473	89.543	97.4896	81.395	92.7138
2900	97	96.4986	97.0669	93.1328	90.8529	93.7881	91.9471	93.5415	89.4245	97.4918	81.0493	92.6727
2900	97	96.452	97.0752	93.1071	90.8151	93.7712	91.9084	93.5432	89.2822	97.4932	80.6648	92.6308
2900	97	96.3948	97.0809	93.0762	90.7651	93.7547	91.8724	93.5518	89.1087	97.4938	80.2323	92.5876
2900	97	96.3258	97.0817	93.0395	90.7002	93.7375	91.8377	93.5657	88.8986	97.4928	79.743	92.5425
2910	97	96.2446	97.0756	92.997	90.6186	93.7182	91.8027	93.5824	88.6497	97.4898	79.1901	92.4946
2910	96.9	96.153	97.0613	92.949	90.5202	93.6955	91.7662	93.5983	88.365	97.484	78.5722	92.4431
2910	96.9	96.054	97.0383	92.8965	90.4066	93.6684	91.7275	93.6099	88.0529	97.4744	77.895	92.3875
2910	96.9	95.9526	97.0069	92.8409	90.2817	93.6363	91.687	93.614	87.7274	97.4607	77.1736	92.3278
2910	96.8	95.8546	96.9687	92.7841	90.1511	93.5996	91.6457	93.6088	87.4061	97.4427	76.4322	92.2651
2920	96.7	95.7664	96.9264	92.7281	90.0221	93.5596	91.6058	93.5946	87.1089	97.4214	75.7025	92.2011
2920	96.7	95.6941	96.883	92.6751	89.9032	93.5185	91.5701	93.5733	86.8554	97.398	75.0215	92.1389
2920	96.6	95.6426	96.8424	92.6272	89.8029	93.4787	91.5419	93.5482	86.6623	97.3741	74.4271	92.0818
2920	96.6	95.615	96.8082	92.5862	89.7292	93.4434	91.5248	93.5235	86.5421	97.3516	73.9549	92.0337
2920	96.5	95.6126	96.7836	92.5538	89.6886	93.4153	91.5216	93.5041	86.502	97.3327	73.6345	91.9983
2930	96.5	95.6343	96.7712	92.5312	89.6861	93.3969	91.5348	93.4948	86.543	97.3195	73.4866	91.9787
2930	96.5	95.6775	96.7725	92.5193	89.7239	93.3902	91.5654	93.4995	86.6598	97.314	73.5205	91.9767
2930	96.5	95.7379	96.7881	92.5188	89.8017	93.3959	91.6137	93.5203	86.8415	97.3175	73.7333	91.993
2930	96.5	95.8102	96.8169	92.5299	89.9166	93.4138	91.6783	93.5576	87.0735	97.3304	74.11	92.027
2930	96.6	95.8892	96.857	92.5528	90.0635	93.4426	91.7572	93.6097	87.3385	97.3521	74.6246	92.0766
2940	96.6	95.9699	96.9053	92.5873	90.2357	93.4803	91.8473	93.6732	87.6189	97.3812	75.2429	92.1388
2940	96.6	96.0481	96.9585	92.6329	90.4255	93.5242	91.9455	93.7437	87.898	97.4153	75.9259	92.2101
2940	96.7	96.1205	97.0127	92.6887	90.6249	93.5715	92.0484	93.8169	88.1612	97.4522	76.6336	92.2869
2940	96.7	96.1852	97.0644	92.7532	90.8267	93.6193	92.1532	93.8889	88.3968	97.4895	77.3291	92.3654
2940	96.8	96.2409	97.1107	92.8246	91.0243	93.6649	92.2575	93.9563	88.5962	97.5249	77.9826	92.4429
2940	96.8	96.2872	97.1489	92.9004	91.2126	93.706	92.3597	94.016	88.754	97.5559	78.5731	92.5172
2950	96.8	96.3245	97.1773	92.978	91.3881	93.7408	92.4585	94.0658	88.8691	97.5804	79.0908	92.5868
2950	96.8	96.3536	97.1954	93.0546	91.5489	93.7684	92.5536	94.1052	88.9444	97.597	79.5365	92.6514
2950	96.8	96.3759	97.2037	93.1276	91.6951	93.7887	92.6453	94.1351	88.9872	97.6058	79.9203	92.7108
2950	96.8	96.393	97.2038	93.1946	91.828	93.8025	92.7345	94.1578	89.008	97.6079	80.2589	92.7658
2950	96.8	96.4068	97.1981	93.2541	91.9501	93.8114	92.8223	94.1764	89.0189	97.6052	80.5726	92.8173
2960	96.8	96.419	97.1896	93.3052	92.0646	93.8174	92.91	94.1944	89.0329	97.6004	80.8815	92.8665
2960	96.9	96.4313	97.1812	93.348	92.1748	93.8227	92.9992	94.2154	89.0622	97.5961	81.2032	92.9146
2960	96.9	96.4451	97.1759	93.3837	92.2837	93.8294	93.0912	94.2422	89.1168	97.595	81.5502	92.963
2960	96.9	96.4613	97.1762	93.4141	92.3937	93.8394	93.187	94.2771	89.2036	97.5989	81.9292	93.0133
2960	97	96.4805	97.1837	93.4416	92.5067	93.8543	93.2876	94.3214	89.3258	97.609	82.3407	93.0666
2970	97	96.5033	97.1992	93.4687	92.6233	93.8749	93.3936	94.3758	89.4824	97.6262	82.7798	93.124
2970	97.1	96.5293	97.2228	93.498	92.7431	93.9014	93.5051	94.4398	89.6689	97.6501	83.2378	93.1862
2970	97.2	96.5582	97.2534	93.5314	92.8651	93.9332	93.6217	94.5116	89.8773	97.6795	83.7036	93.2533
2970	97.2	96.5891	97.2892	93.5704	92.9873	93.9689	93.7425	94.5883	90.0979	97.7123	84.1653	93.3249
2970	97.3	96.6213	97.3279	93.6155	93.1074	94.007	93.8659	94.6672	90.3209	97.7464	84.6122	93.4001
2980	97.4	96.6539	97.3674	93.6666	93.2229	94.0457	93.9903	94.7454	90.5378	97.78	85.0354	93.4775
2980	97.5	96.6864	97.4053	93.7224	93.3315	94.0833	94.1137	94.8207	90.7417	97.8117	85.4285	93.5552
2980	97.5	96.7181	97.4398	93.7813	93.4312	94.1185	94.2338	94.891	90.9283	97.8407	85.787	93.6314
2980	97.5	96.7486	97.4692	93.8413	93.5207	94.15	94.3488	94.9543	91.095	97.8659	86.1087	93.7043
2980	97.6	96.7773	97.4926	93.9003	93.5989	94.1773	94.4566	95.0092	91.2413	97.8869	86.3923	93.7725
2990	97.6	96.8037	97.5096	93.9563	93.6658	94.2001	94.5558	95.0551	91.3686	97.9035	86.6372	93.8348
2990	97.6	96.8273	97.5204	94.0079	93.7218	94.2187	94.6453	95.0922	91.4791	97.9159	86.8435	93.891
2990	97.6	96.8479	97.5255	94.054	93.7678	94.2339	94.7246	95.1211	91.5755	97.9245	87.0112	93.941
2990	97.6	96.8652	97.5263	94.0943	93.8051	94.2466	94.7936	95.1437	91.6607	97.9303	87.1414	93.9853
2990	97.7	96.8792	97.5241	94.1288	93.8354	94.2581	94.8529	95.1624	91.7376	97.9345	87.236	94.0243
2990	97.7	96.89	97.5204	94.1582	93.8603	94.2693	94.9032	95.1798	91.8081	97.9388	87.2988	94.0584
3000	97.7	96.8977	97.5171	94.1832	93.8811	94.2812	94.9456	95.1982	91.8734	97.9447	87.3351	94.088
3000	97.7	96.9025	97.5154	94.205	93.8991	94.2941	94.9811	95.2195	91.934	97.9537	87.3522	94.1132
3000	97.7	96.9048	97.5165	94.2242	93.915	94.3081	95.0108	95.2445	91.9894	97.9671	87.3586	94.1339
3000	97.7	96.9051	97.521	94.2414	93.929	94.3226	95.0352	95.2733	92.0385	97.9855	87.3634	94.1502
3000	97.7	96.9036	97.529	94.2568	93.9411	94.3369	95.0549	95.3043	92.0792	98.0085	87.3751	94.1621
3010	97.7	96.9005	97.5399	94.2705	93.9507	94.3495	95.0701	95.3344	92.1086	98.0348	87.4009	94.1697
3010	97.8	96.8955	97.5526	94.2821	93.9572	94.3594	95.0808	95.3599	92.1236	98.0619	87.4456	94.1736
3010	97.8	96.8883	97.5658	94.2913	93.9601	94.3651	95.0869	95.3773	92.1218	98.0868	87.5113	94.1741
3010	97.8	96.8786	97.5779	94.2973	93.9588	94.3661	95.088	95.3839	92.1018	98.1067	87.5969	94.1723
3010	97.8	96.8662	97.5878	94.2997	93.9534	94.3621	95.0843	95.3786	92.0641	98.1193	87.6989	94.1687
3020	97.8	96.8513	97.5944	94.2982	93.944	94.3537	95.076	95.362	92.0107	98.1232	87.8117	94.1641
3020	97.8	96.8338	97.5972	94.2928	93.9313	94.342	95.0637	95.3365	91.9457	98.1184	87.9287	94.1589
3020	97.7	96.814	97.5962	94.2834	93.9162	94.3287	95.0479	95.3056	91.8744	98.1061	88.0427	94.1531
3020	97.7	96.7923	97.592	94.2704	93.8994	94.3154	95.0295	95.2733	91.8023	98.0884	88.1476	94.1464
3020	97.7	96.7694	97.5854	94.2548	93.8816	94.3039	95.0094	95.2432	91.7348	98.0681	88.2386	94.1385
3030	97.7	96.7461	97.5777	94.2375	93.8633	94.2954	94.9884	95.2182	91.6761	98.0482	88.3126	94.1291
3030	97.7	96.7234	97.57	94.2196	93.8449	94.2905	94.9673	95.2001	91.6286	98.0316	88.3685	94.118
3030	97.6	96.7019	97.5633	94.202	93.826	94.289	94.9464	95.1889	91.5926	98.0206	88.4064	94.1051
3030	97.7	96.6819	97.5582	94.1858	93.8062	94.2902	94.926	95.1831	91.5657	98.0161	88.4279	94.0904
3030	97.7	96.6631	97.5548	94.1715	93.7848	94.2925	94.9055	95.1797	91.5435	98.0175	88.4352	94.0743
3040	97.7	96.6451	97.553	94.1594	93.7608	94.2941	94.8846	95.1753	91.5202	98.0235	88.4306	94.0572
3040	97.7	96.6272	97.5523	94.1494	93.7338	94.2933	94.8625	95.1672	91.4905	98.0323	88.4164	94.0395
3040	97.7	96.6089	97.5521	94.1407	93.7035	94.2886	94.8387	95.1536	91.4501	98.0419	88.3948	94.0215
3040	97.7	96.5896	97.5519	94.1328	93.6701	94.2795	94.8128	95.1337	91.3959	98.0507	88.3673	94.0033
3040	97.7	96.5689	97.551	94.1245	93.6341	94.266	94.7844	95.1071	91.327	98.057	88.3349	93.9849
3050	97.7	96.5459	97.5488	94.1147	93.5961	94.2488	94.7533	95.0743	91.2443	98.0593	88.2981	93.9658
3050	97.6	96.5204	97.5446	94.1023	93.5567	94.229	94.7195	95.0356	91.1501	98.0567	88.2573	93.9458
3050	97.6	96.4921	97.5384	94.0866	93.5166	94.2083	94.683	94.9916	91.0483	98.0486	88.2128	93.9243
3050	97.6	96.4617	97.5302	94.0675	93.4767	94.1884	94.6444	94.9434	90.9435	98.0352	88.1652	93.9014
3050	97.5	96.43	97.5207	94.0453	93.4375	94.1711	94.6044	94.893	90.8412	98.0178	88.1152	93.8772
3050	97.5	96.3977	97.5105	94.0207	93.3993	94.1577	94.5636	94.8426	90.7462	97.998	88.0637	93.8518
3060	97.4	96.3656	97.5002	93.9942	93.362	94.1486	94.5226	94.7939	90.6616	97.9771	88.0114	93.8258
3060	97.4	96.3342	97.4905	93.967	93.325	94.1436	94.4816	94.7486	90.5888	97.9566	87.959	93.7996
3060	97.4	96.3039	97.4822	93.94	93.2878	94.1417	94.4411	94.708	90.5281	97.9377	87.9072	93.7736
3060	97.4	96.2753	97.4759	93.9141	93.2498	94.1418	94.4013	94.6743	90.4787	97.9224	87.8569	93.7482
3060	97.4	96.2486	97.4725	93.8898	93.2108	94.1425	94.3625	94.6494	90.4395	97.9127	87.8087	93.7237
3070	97.4	96.2243	97.4723	93.8673	93.1704	94.1425	94.3251	94.6347	90.4087	97.9098	87.763	93.7001
3070	97.4	96.2022	97.4754	93.8465	93.1287	94.1409	94.289	94.6295	90.3835	97.9145	87.72	93.6773
3070	97.4	96.1815	97.4811	93.8267	93.0857	94.1367	94.2538	94.6317	90.3605	97.926	87.6793	93.6549
3070	97.4	96.1616	97.4883	93.8071	93.0412	94.1295	94.219	94.6373	90.3361	97.9424	87.6403	93.6326
3070	97.4	96.1415	97.4958	93.7871	92.9955	94.1195	94.1838	94.6419	90.3071	97.961	87.6021	93.6103
3080	97.4	96.1208	97.5022	93.7661	92.949	94.1074	94.1477	94.641	90.2712	97.9791	87.5642	93.5879
3080	97.4	96.0988	97.5065	93.7439	92.902	94.0943	94.1101	94.6315	90.2276	97.9939	87.5259	93.5654
3080	97.4	96.0754	97.5073	93.7202	92.8547	94.0813	94.0703	94.6108	90.1761	98.003	87.4867	93.5429
3080	97.4	96.0498	97.5036	93.695	92.8069	94.0691	94.0278	94.5773	90.1167	98.0039	87.4462	93.5203
3080	97.4	96.0217	97.4947	93.6686	92.7582	94.058	93.982	94.5303	90.0498	97.9948	87.4038	93.4978
3090	97.3	95.991	97.4805	93.6413	92.7081	94.0479	93.9327	94.4709	89.9767	97.9751	87.3593	93.4752
3090	97.3	95.9579	97.4617	93.6139	92.6561	94.0384	93.8802	94.4019	89.8996	97.9462	87.3126	93.4525
3090	97.2	95.9233	97.4397	93.5867	92.6021	94.0289	93.8252	94.3276	89.8218	97.9107	87.2639	93.4295
3090	97.2	95.888	97.416	93.5605	92.5459	94.0189	93.7687	94.2526	89.7463	97.8723	87.2138	93.4059
3090	97.1	95.853	97.3927	93.5354	92.4876	94.0076	93.7116	94.1813	89.6758	97.8349	87.1627	93.3816
3100	97	95.819	97.3717	93.5116	92.4276	93.9945	93.6548	94.1172	89.612	97.8023	87.1111	93.3565
3100	97	95.7866	97.3545	93.489	92.3666	93.9792	93.599	94.0628	89.556	97.7775	87.0595	93.3304
3100	97	95.7562	97.3425	93.4673	92.3054	93.962	93.5447	94.0197	89.508	97.7626	87.008	93.3036
3100	97	95.7283	97.3365	93.4462	92.245	93.9438	93.4921	93.9885	89.4674	97.7589	86.9569	93.2763
3100	97	95.7029	97.3365	93.4252	92.1864	93.9258	93.4413	93.9691	89.4332	97.7661	86.9063	93.2487
3100	97	95.6796	97.3418	93.4036	92.1304	93.9094	93.3916	93.9598	89.4034	97.7827	86.8561	93.2211
3110	97	95.6574	97.3507	93.3808	92.0768	93.8956	93.3422	93.9569	89.3748	97.8053	86.8058	93.1935
3110	97	95.6349	97.361	93.356	92.0251	93.8849	93.2916	93.9558	89.3435	97.8293	86.7548	93.1659
3110	97	95.6108	97.3701	93.3286	91.9743	93.8773	93.2388	93.951	89.3055	97.8501	86.7022	93.138
3110	97	95.584	97.3758	93.2984	91.9232	93.8723	93.1826	93.9381	89.2583	97.8635	86.647	93.1094
3110	97	95.5538	97.3764	93.2651	91.8701	93.8689	93.1225	93.9136	89.2003	97.8668	86.5885	93.0796
3120	97	95.5203	97.3708	93.2292	91.8137	93.8657	93.0581	93.8751	89.1311	97.8583	86.5262	93.0481
3120	96.9	95.4834	97.3584	93.1911	91.7528	93.8609	92.9893	93.8219	89.0509	97.8377	86.4598	93.0148
3120	96.9	95.4437	97.3397	93.1516	91.6868	93.8529	92.9166	93.7548	88.9609	97.8061	86.3894	92.9794
3120	96.8	95.4018	97.3156	93.1114	91.6155	93.84	92.8402	93.6764	88.8629	97.766	86.3154	92.942
3120	96.7	95.3587	97.2878	93.0712	91.5394	93.8214	92.7611	93.5909	88.7597	97.7208	86.2384	92.9027
3130	96.7	95.3157	97.2582	93.0315	91.46	93.797	92.6802	93.5033	88.6544	97.6748	86.1594	92.862
3130	96.6	95.2738	97.2291	92.9929	91.3787	93.7676	92.5983	93.4187	88.5498	97.6319	86.079	92.8203
3130	96.6	95.2339	97.2021	92.9556	91.2975	93.7345	92.5163	93.341	88.4477	97.5954	85.9982	92.778
3130	96.5	95.1959	97.1785	92.9192	91.2177	93.6995	92.4346	93.2721	88.3488	97.5667	85.9173	92.7354
3130	96.5	95.1595	97.1588	92.8833	91.1403	93.6644	92.3533	93.2122	88.2525	97.5463	85.8366	92.6927
3140	96.4	95.124	97.1431	92.8473	91.0662	93.631	92.2725	93.1603	88.1582	97.5334	85.756	92.6497
3140	96.4	95.0888	97.1311	92.8104	90.9954	93.601	92.1922	93.1147	88.0652	97.5267	85.6755	92.6063
3140	96.4	95.0533	97.1223	92.772	90.9276	93.5757	92.1121	93.0731	87.9733	97.5243	85.5949	92.5622
3140	96.3	95.017	97.1157	92.7315	90.8617	93.5554	92.0319	93.0331	87.8817	97.5242	85.5138	92.5171
3140	96.3	94.9791	97.1102	92.6886	90.7964	93.5398	91.9508	92.9915	87.7893	97.5234	85.4317	92.4708
3150	96.3	94.9391	97.1043	92.6432	90.7301	93.5276	91.868	92.9454	87.6943	97.5193	85.3482	92.4234
3150	96.3	94.8963	97.0965	92.5955	90.661	93.5169	91.7826	92.8923	87.5953	97.5093	85.2629	92.3748
3150	96.2	94.8505	97.0857	92.5457	90.5879	93.5054	91.694	92.8314	87.4913	97.4923	85.1757	92.325
3150	96.2	94.8021	97.0709	92.4943	90.5102	93.4913	91.602	92.7629	87.3824	97.4681	85.0867	92.2743
3150	96.1	94.7517	97.0519	92.442	90.4279	93.4731	91.5065	92.6877	87.2685	97.4374	84.996	92.2228
3160	96.1	94.6997	97.0286	92.3894	90.3416	93.4497	91.408	92.6066	87.1496	97.4014	84.9039	92.1707
3160	96	94.6464	97.0008	92.3372	90.252	93.4207	91.3066	92.5205	87.0254	97.3611	84.8105	92.1179
3160	95.9	94.5923	96.9691	92.2855	90.1604	93.3865	91.2031	92.4307	86.8961	97.3181	84.7159	92.0645
3160	95.9	94.5375	96.9343	92.2346	90.068	93.3483	91.0982	92.3394	86.7627	97.2744	84.6206	92.0101
3160	95.8	94.4825	96.8976	92.1844	89.9764	93.3079	90.9925	92.249	86.6272	97.232	84.5249	91.9547
3160	95.7	94.4277	96.8604	92.1345	89.8869	93.2674	90.8868	92.1624	86.4918	97.193	84.4294	91.898
3170	95.7	94.3733	96.8242	92.0844	89.8004	93.2288	90.7811	92.0816	86.3589	97.1587	84.3344	91.84
3170	95.6	94.3192	96.79	92.0334	89.7171	93.1936	90.6754	92.0075	86.2295	97.1295	84.24	91.7806
3170	95.6	94.2652	96.7589	91.9811	89.6365	93.1625	90.5692	91.9395	86.1042	97.1047	84.146	91.7198
3170	95.5	94.2106	96.7312	91.927	89.5579	93.1358	90.4622	91.8765	85.9829	97.0831	84.0523	91.658
3170	95.5	94.1553	96.7071	91.8709	89.4801	93.1126	90.3537	91.8172	85.8656	97.0636	83.9585	91.595
3180	95.4	94.0991	96.6864	91.8126	89.4021	93.0919	90.2437	91.7601	85.7523	97.0455	83.8645	91.5311
3180	95.4	94.0421	96.6688	91.7522	89.3231	93.0721	90.1321	91.7036	85.6425	97.028	83.7703	91.4663
3180	95.4	93.9844	96.6535	91.6901	89.2424	93.0518	90.019	91.6457	85.5354	97.0104	83.6756	91.4006
3180	95.3	93.926	96.6393	91.6268	89.1594	93.0293	89.9044	91.5849	85.4294	96.9921	83.5805	91.3341
3180	95.3	93.867	96.6249	91.5629	89.0741	93.0035	89.7885	91.5199	85.3231	96.9728	83.4848	91.2664
3190	95.2	93.8072	96.6089	91.4986	88.9864	92.9739	89.6711	91.4506	85.2153	96.9524	83.3885	91.1977
3190	95.2	93.7467	96.5901	91.4342	88.8969	92.9404	89.5524	91.3776	85.1054	96.9315	83.2917	91.1277
3190	95.1	93.6859	96.5676	91.3701	88.8063	92.9039	89.4321	91.3022	84.9933	96.9104	83.1948	91.0565
3190	95.1	93.6249	96.5411	91.3063	88.7154	92.8654	89.3101	91.226	84.8793	96.8898	83.0979	90.9843
3190	95	93.5639	96.5106	91.2426	88.625	92.8265	89.1865	91.1501	84.7638	96.8702	83.0016	90.9113
3200	95	93.5027	96.4765	91.1791	88.5356	92.7885	89.0612	91.0752	84.6472	96.8514	82.9058	90.8379
3200	94.9	93.4411	96.4395	91.1156	88.4474	92.7523	88.9344	91.0015	84.5297	96.833	82.8108	90.7643
3200	94.9	93.3791	96.4005	91.0518	88.3603	92.7187	88.8064	90.9285	84.4116	96.8144	82.7164	90.6908
3200	94.8	93.3163	96.3607	90.9875	88.2742	92.6877	88.6776	90.8561	84.2933	96.7948	82.6225	90.6174
3200	94.8	93.2528	96.321	90.9222	88.1886	92.6589	88.5485	90.7837	84.1753	96.7738	82.5293	90.5442
3210	94.7	93.1888	96.2826	90.856	88.1034	92.6315	88.4196	90.711	84.058	96.7511	82.4366	90.471
3210	94.7	93.1241	96.2465	90.7889	88.018	92.6044	88.2912	90.6379	83.9417	96.7265	82.3447	90.3976
3210	94.6	93.0588	96.213	90.7208	87.9322	92.5765	88.163	90.5643	83.8264	96.7	82.2534	90.3238
3210	94.6	92.9928	96.1822	90.6517	87.8457	92.5468	88.0346	90.4902	83.7117	96.6719	82.1626	90.2491
3210	94.5	92.9264	96.1539	90.5817	87.7584	92.5146	87.9054	90.4157	83.5978	96.6426	82.0723	90.1735
3210	94.5	92.86	96.1279	90.5111	87.6707	92.4798	87.7748	90.3414	83.485	96.6132	81.9824	90.097
3220	94.4	92.7942	96.1038	90.4399	87.5828	92.4429	87.6425	90.2683	83.374	96.5854	81.8929	90.0197
3220	94.4	92.7294	96.0812	90.3684	87.4955	92.4046	87.5083	90.1973	83.2658	96.5607	81.8041	89.9418
3220	94.3	92.6659	96.0595	90.2965	87.4091	92.3661	87.3723	90.1293	83.1606	96.5404	81.7161	89.8634
3220	94.3	92.6037	96.0379	90.2245	87.324	92.3283	87.2349	90.0639	83.0581	96.5249	81.6287	89.7846
3220	94.3	92.5425	96.0154	90.1522	87.2399	92.2919	87.0961	89.9999	82.9568	96.5135	81.5418	89.7055
3230	94.2	92.4822	95.9911	90.0798	87.1566	92.2572	86.9564	89.9362	82.8548	96.505	81.4549	89.626
3230	94.2	92.4222	95.9642	90.0072	87.0739	92.2243	86.816	89.8719	82.7507	96.4981	81.3675	89.546
3230	94.2	92.3625	95.9343	89.9345	86.9914	92.193	86.6753	89.8066	82.6434	96.4917	81.2797	89.4654
3230	94.1	92.3027	95.9016	89.8619	86.9092	92.1631	86.5345	89.7402	82.5323	96.4846	81.1911	89.3842
3230	94.1	92.2424	95.8661	89.7894	86.827	92.1336	86.3933	89.6724	82.4167	96.4757	81.1017	89.3023
3240	94	92.1813	95.828	89.7169	86.7447	92.1038	86.2512	89.6021	82.2958	96.4633	81.0112	89.2197
3240	94	92.1193	95.7878	89.6446	86.662	92.0726	86.1076	89.5275	82.1687	96.4457	80.9195	89.1366
3240	93.9	92.0566	95.746	89.5727	86.5793	92.0394	85.9619	89.4474	82.0349	96.422	80.8264	89.0536
3240	93.9	91.9935	95.7037	89.501	86.4966	92.0041	85.8142	89.3612	81.8951	96.3922	80.732	88.9708
3240	93.8	91.9305	95.6618	89.4293	86.4144	91.9668	85.6645	89.2697	81.7507	96.3569	80.6365	88.8887
3250	93.7	91.8678	95.6214	89.3576	86.3329	91.9281	85.5132	89.1739	81.6033	96.3174	80.5405	88.8073
3250	93.7	91.8059	95.5832	89.2855	86.2523	91.8889	85.3609	89.0753	81.4539	96.275	80.4443	88.7266
3250	93.6	91.7451	95.5478	89.213	86.1726	91.8499	85.2083	88.9753	81.3037	96.2311	80.3484	88.6464
3250	93.5	91.6859	95.5156	89.1401	86.0938	91.8121	85.0559	88.8759	81.1537	96.1873	80.2532	88.5666
3250	93.5	91.6288	95.4868	89.0668	86.0163	91.7763	84.9047	88.78	81.0059	96.146	80.1591	88.4871
3260	93.4	91.574	95.4616	88.9932	85.9402	91.7434	84.7551	88.6911	80.8627	96.11	80.0667	88.4079
3260	93.4	91.5217	95.4401	88.9195	85.8662	91.7139	84.6079	88.6119	80.7263	96.0818	79.9767	88.3291
3260	93.4	91.4718	95.4217	88.8461	85.7945	91.6878	84.4631	88.5437	80.5977	96.0626	79.8893	88.2508
3260	93.3	91.4237	95.4053	88.7734	85.7251	91.6642	84.3204	88.4848	80.4761	96.0519	79.8049	88.1731
3260	93.3	91.3767	95.389	88.7016	85.6575	91.6419	84.1794	88.4317	80.3592	96.0473	79.7232	88.0963
3260	93.3	91.3302	95.3712	88.6311	85.5914	91.6193	84.0393	88.38	80.2442	96.0458	79.6439	88.0206
3270	93.3	91.2833	95.3505	88.5624	85.5264	91.5952	83.9	88.3259	80.1286	96.0442	79.5667	87.9463
3270	93.3	91.2354	95.3261	88.4957	85.4623	91.5689	83.7614	88.2669	80.0113	96.0401	79.4913	87.8733
3270	93.2	91.186	95.2974	88.431	85.3986	91.5398	83.6236	88.2014	79.8916	96.0313	79.4173	87.8017
3270	93.2	91.1347	95.2647	88.3684	85.3349	91.5081	83.4866	88.1289	79.7694	96.016	79.3446	87.7311
3270	93.1	91.0815	95.2285	88.3076	85.2709	91.4743	83.3511	88.05	79.6459	95.9937	79.2731	87.6613
3280	93.1	91.0269	95.1903	88.2483	85.2063	91.4394	83.2175	87.9672	79.5237	95.9651	79.2028	87.5921
3280	93	90.9715	95.1515	88.1901	85.1412	91.4046	83.0867	87.8845	79.4069	95.9329	79.1341	87.5232
3280	93	90.9159	95.1143	88.1324	85.0758	91.3713	82.9596	87.8067	79.3003	95.9003	79.0673	87.4547
3280	92.9	90.8608	95.0805	88.0748	85.0102	91.3406	82.8367	87.7377	79.2081	95.871	79.0029	87.3867
3280	92.9	90.8068	95.0512	88.017	84.9447	91.3131	82.7184	87.68	79.1328	95.8476	78.9413	87.3192
3290	92.9	90.7538	95.0265	87.9587	84.8791	91.2886	82.6049	87.6337	79.0745	95.831	78.8825	87.2524
3290	92.8	90.7016	95.0057	87.8998	84.8131	91.2661	82.4954	87.5968	79.0311	95.8207	78.8265	87.1864
3290	92.8	90.6496	94.9874	87.8402	84.7462	91.2443	82.389	87.5662	78.9992	95.8151	78.773	87.1211
3290	92.8	90.5972	94.97	87.7802	84.6785	91.2216	82.2848	87.5389	78.9745	95.8122	78.7214	87.0562
3290	92.8	90.5437	94.9517	87.7202	84.6103	91.1968	82.1815	87.5116	78.9528	95.8099	78.6712	86.9916
3300	92.8	90.4878	94.931	87.6608	84.5416	91.1686	82.0778	87.4806	78.9296	95.8057	78.6217	86.9269
3300	92.7	90.4285	94.9059	87.6021	84.4725	91.1362	81.9717	87.442	78.9003	95.7966	78.5717	86.8615
3300	92.7	90.3648	94.8749	87.5441	84.4025	91.0985	81.8617	87.3918	78.8609	95.7801	78.5201	86.7947
3300	92.7	90.2957	94.8369	87.4867	84.3312	91.0554	81.7461	87.327	78.8088	95.7544	78.4659	86.7258
3300	92.6	90.2211	94.7919	87.4295	84.2582	91.0072	81.6242	87.2465	78.7437	95.719	78.4084	86.6545
3310	92.5	90.1409	94.7402	87.3721	84.183	90.9545	81.4956	87.1505	78.6666	95.6746	78.3472	86.5802
3310	92.4	90.0554	94.6829	87.314	84.105	90.8981	81.3604	87.0402	78.5797	95.6226	78.2822	86.5028
3310	92.3	89.9651	94.6212	87.2544	84.0238	90.839	81.2192	86.918	78.4857	95.5649	78.2135	86.422
3310	92.2	89.8711	94.5565	87.193	83.9388	90.7782	81.0729	86.7871	78.3879	95.5034	78.1415	86.3379
3310	92.1	89.7742	94.4902	87.1291	83.8499	90.7163	80.9224	86.6515	78.2892	95.4404	78.0669	86.2504
3320	91.9	89.6752	94.4232	87.0622	83.757	90.6538	80.7688	86.515	78.1926	95.3778	77.9904	86.1593
3320	91.8	89.5749	94.3567	86.9923	83.6606	90.5911	80.6128	86.3816	78.1	95.3172	77.9128	86.0646
3320	91.7	89.4737	94.2912	86.9194	83.5617	90.5284	80.455	86.2547	78.0134	95.2602	77.835	85.9663
3320	91.6	89.3719	94.2271	86.844	83.4617	90.4658	80.2961	86.1366	77.9337	95.2081	77.7574	85.8644
3320	91.5	89.2693	94.1645	86.7666	83.362	90.4032	80.1363	86.0283	77.8613	95.161	77.6804	85.7592
3320	91.4	89.1656	94.1026	86.6874	83.2636	90.3401	79.9757	85.9293	77.7955	95.1187	77.6037	85.6508
3330	91.4	89.0602	94.0406	86.607	83.1673	90.2763	79.8147	85.8379	77.7353	95.0804	77.5271	85.5393
3330	91.3	88.9527	93.9779	86.5257	83.0736	90.2112	79.6537	85.7516	77.679	95.045	77.4502	85.4252
3330	91.2	88.8427	93.9137	86.444	82.9825	90.1447	79.4935	85.6677	77.6249	95.011	77.3726	85.309
3330	91.1	88.7297	93.8473	86.3624	82.8934	90.0763	79.3349	85.5831	77.5711	94.9767	77.2939	85.1913
3330	91	88.6134	93.7781	86.2809	82.8055	90.0058	79.1786	85.4949	77.5154	94.9405	77.2139	85.0728
3340	91	88.4937	93.7058	86.1994	82.7174	89.933	79.0251	85.4016	77.4568	94.901	77.1325	84.9539
3340	90.9	88.3706	93.6304	86.1176	82.6277	89.8578	78.8751	85.3025	77.3947	94.8576	77.0494	84.835
3340	90.8	88.2442	93.5518	86.0348	82.5348	89.7801	78.7284	85.1971	77.3284	94.8098	76.9651	84.7162
3340	90.7	88.1139	93.4698	85.9505	82.4375	89.6995	78.5845	85.0848	77.2573	94.7568	76.8795	84.5976
3340	90.5	87.9796	93.3846	85.864	82.3348	89.6159	78.4427	84.9661	77.1812	94.6986	76.793	84.4791
3350	90.4	87.8415	93.2965	85.7748	82.2267	89.5292	78.3024	84.8426	77.1012	94.6363	76.7059	84.3603
3350	90.3	87.6996	93.2062	85.6824	82.1138	89.4399	78.1632	84.717	77.0195	94.5716	76.6187	84.241
3350	90.1	87.5545	93.1144	85.5867	81.9974	89.3484	78.025	84.5929	76.9389	94.507	76.5316	84.1208
3350	90	87.4069	93.0216	85.4877	81.879	89.2553	77.888	84.4735	76.8622	94.4447	76.4451	83.9992
3350	89.9	87.2573	92.9286	85.386	81.7604	89.1613	77.7528	84.3617	76.7914	94.3864	76.3592	83.876
3360	89.7	87.1064	92.8357	85.2821	81.643	89.0668	77.6198	84.2588	76.7272	94.333	76.2742	83.7511
3360	89.6	86.9547	92.7428	85.177	81.5281	88.9719	77.489	84.1641	76.6686	94.2835	76.1895	83.6245
3360	89.5	86.8023	92.6492	85.0717	81.4161	88.8766	77.3602	84.0747	76.613	94.2358	76.1049	83.4963
3360	89.4	86.6496	92.5545	84.9672	81.307	88.7809	77.2327	83.9871	76.5573	94.1873	76.0198	83.3668
3360	89.3	86.4968	92.458	84.8641	81.2003	88.6845	77.1059	83.8972	76.4984	94.1356	75.9336	83.2365
3370	89.1	86.344	92.3593	84.7632	81.0953	88.5873	76.9789	83.801	76.4336	94.0783	75.8463	83.1062
3370	89	86.1911	92.258	84.6648	80.9908	88.4891	76.8509	83.6942	76.3602	94.0132	75.7576	82.9767
3370	88.9	86.0382	92.1541	84.5688	80.8857	88.3897	76.7211	83.5743	76.2766	93.9391	75.6678	82.8488
3370	88.7	85.8857	92.0479	84.4752	80.7794	88.2894	76.5898	83.4414	76.1835	93.8567	75.5773	82.7233
3370	88.5	85.7345	91.9407	84.3837	80.672	88.1888	76.4578	83.2986	76.0838	93.7684	75.4871	82.6011
3370	88.4	85.5857	91.8343	84.294	80.5642	88.089	76.327	83.1519	75.9827	93.6785	75.3982	82.4827
3380	88.2	85.4409	91.7306	84.2059	80.4573	87.9913	76.1998	83.0087	75.886	93.5919	75.3121	82.3687
3380	88.1	85.3013	91.632	84.1197	80.3532	87.8972	76.0788	82.8768	75.7999	93.5136	75.2304	82.2596
3380	88	85.1682	91.5398	84.0354	80.2537	87.808	75.9662	82.7627	75.7291	93.4477	75.1541	82.1555
3380	87.9	85.0419	91.4547	83.9533	80.1603	87.7243	75.863	82.6699	75.6757	93.3959	75.0836	82.0563
3380	87.8	84.9224	91.3763	83.8734	80.0737	87.6463	75.7694	82.5985	75.6393	93.3577	75.0187	81.9614
3390	87.7	84.8095	91.3038	83.796	79.9943	87.5738	75.6843	82.546	75.6177	93.3314	74.959	81.8705
3390	87.7	84.7027	91.2361	83.7216	79.9222	87.5065	75.6064	82.5082	75.6076	93.3143	74.9037	81.783
3390	87.6	84.6013	91.1717	83.6506	79.8568	87.4438	75.5336	82.4789	75.6048	93.3028	74.852	81.6987
3390	87.6	84.5044	91.1091	83.5833	79.7969	87.3847	75.4637	82.4511	75.6037	93.2925	74.8029	81.6171
3390	87.6	84.4107	91.0468	83.5198	79.7409	87.328	75.3945	82.4177	75.599	93.279	74.7554	81.5382
3400	87.5	84.3195	90.9835	83.4601	79.6873	87.2725	75.3247	82.3733	75.5861	93.259	74.7088	81.4618
3400	87.4	84.23	90.9188	83.4041	79.6342	87.2174	75.2534	82.315	75.5626	93.2303	74.6628	81.3881
3400	87.4	84.1419	90.8527	83.3514	79.5807	87.1618	75.181	82.242	75.5275	93.1924	74.6175	81.317
3400	87.3	84.0551	90.7857	83.3018	79.5262	87.1054	75.1086	82.1556	75.481	93.1456	74.5732	81.249
3400	87.2	83.9696	90.719	83.2554	79.4707	87.0481	75.0376	82.0586	75.4249	93.0914	74.5309	81.1843
3410	87.1	83.8856	90.6535	83.2121	79.4149	86.9903	74.9699	81.9551	75.3622	93.0321	74.4916	81.1234
3410	87	83.8033	90.5902	83.1716	79.3597	86.9325	74.9071	81.8495	75.2965	92.9701	74.456	81.0665
3410	86.9	83.7227	90.5295	83.133	79.3057	86.8751	74.8502	81.7464	75.2315	92.908	74.4247	81.0134
3410	86.8	83.6447	90.472	83.096	79.2543	86.8191	74.7999	81.6502	75.1718	92.8485	74.3981	80.964
3410	86.7	83.5709	90.4189	83.0606	79.2071	86.7659	74.7571	81.5659	75.1225	92.795	74.377	80.9188
3420	86.6	83.5029	90.3715	83.0278	79.1664	86.7175	74.7227	81.4977	75.0885	92.7506	74.3619	80.878
3420	86.6	83.4426	90.3312	82.9988	79.1337	86.6754	74.6974	81.4485	75.0733	92.7175	74.3534	80.8423
3420	86.5	83.391	90.2984	82.9747	79.1104	86.641	74.6816	81.4194	75.0788	92.6971	74.3517	80.8124
3420	86.5	83.3491	90.2735	82.9565	79.0968	86.6152	74.6755	81.4108	75.1055	92.6895	74.3567	80.7887
3420	86.5	83.3174	90.2563	82.945	79.0928	86.5983	74.6794	81.4211	75.152	92.6941	74.3681	80.7718
3430	86.5	83.2952	90.2459	82.9404	79.0975	86.5897	74.6928	81.4466	75.2147	92.7083	74.3856	80.7619
3430	86.5	83.2811	90.2405	82.943	79.1092	86.5881	74.7149	81.4814	75.2874	92.7282	74.4083	80.7592
3430	86.5	83.2731	90.2382	82.9521	79.1262	86.5915	74.7447	81.5184	75.363	92.749	74.4353	80.7635
3430	86.6	83.2688	90.2369	82.967	79.1464	86.5978	74.7807	81.5506	75.4344	92.766	74.4657	80.7744
3430	86.6	83.266	90.2346	82.9866	79.1679	86.605	74.8218	81.5724	75.4959	92.7753	74.4988	80.7915
3430	86.6	83.2624	90.2296	83.0088	79.189	86.6108	74.8666	81.5804	75.5437	92.7741	74.5336	80.8139
3440	86.5	83.257	90.2208	83.0315	79.2081	86.6136	74.9138	81.5734	75.5759	92.7607	74.5694	80.8406
3440	86.5	83.2502	90.2086	83.0537	79.2253	86.6129	74.9631	81.5534	75.5942	92.7362	74.6061	80.8709
3440	86.5	83.2439	90.1957	83.0761	79.2424	86.6098	75.0158	81.5259	75.6039	92.704	74.6446	80.9049
3440	86.5	83.241	90.1851	83.1	79.2619	86.6064	75.0738	81.4983	75.6122	92.6693	74.6864	80.9429
3440	86.4	83.2442	90.1802	83.1269	79.2865	86.6053	75.139	81.4787	75.6271	92.6375	74.7328	80.9855
3450	86.4	83.2561	90.1839	83.1582	79.3187	86.6089	75.2139	81.4752	75.6569	92.6145	74.7854	81.0331
3450	86.4	83.2793	90.1987	83.1954	79.3607	86.62	75.3002	81.4945	75.7087	92.6054	74.8456	81.0863
3450	86.5	83.3152	90.2259	83.2393	79.4137	86.6405	75.399	81.5405	75.7869	92.6133	74.9141	81.1454
3450	86.5	83.3638	90.2655	83.2905	79.4779	86.6714	75.5106	81.6137	75.8928	92.6394	74.9911	81.2105
3450	86.6	83.4247	90.3163	83.3489	79.5529	86.7127	75.6344	81.7117	76.025	92.6829	75.0764	81.2816
3460	86.7	83.496	90.3764	83.4139	79.6375	86.7638	75.7692	81.8301	76.1797	92.7417	75.169	81.3585
3460	86.8	83.5757	90.443	83.4841	79.7298	86.8232	75.9129	81.9626	76.351	92.8117	75.2677	81.4407
3460	86.9	83.6606	90.5126	83.5579	79.8273	86.8882	76.0632	82.1018	76.5314	92.888	75.3709	81.5276
3460	87	83.7479	90.5817	83.6331	79.9274	86.956	76.2171	82.2404	76.7123	92.9649	75.4766	81.6182
3460	87.1	83.835	90.6472	83.7079	80.0279	87.0236	76.3724	82.3721	76.8867	93.0372	75.5832	81.7117
3470	87.2	83.9203	90.7076	83.7814	80.1278	87.0888	76.5278	82.4933	77.0496	93.1017	75.6898	81.8075
3470	87.3	84.0031	90.7625	83.8537	80.2271	87.1503	76.6827	82.6023	77.1985	93.1566	75.7959	81.9056
3470	87.4	84.0828	90.8118	83.9249	80.3259	87.2073	76.8371	82.6992	77.3327	93.2011	75.9017	82.0057
3470	87.4	84.1592	90.8561	83.9952	80.4244	87.2594	76.9912	82.7855	77.4531	93.2357	76.0074	82.1077
3470	87.5	84.233	90.8967	84.0651	80.5233	87.3069	77.1454	82.8648	77.5636	93.262	76.1136	82.2113
3480	87.5	84.3053	90.9356	84.1358	80.6234	87.3513	77.3007	82.9413	77.669	93.2831	76.2209	82.3164
3480	87.6	84.3774	90.975	84.2083	80.7257	87.3943	77.4578	83.0193	77.7746	93.3019	76.3302	82.4229
3480	87.6	84.4511	91.0171	84.2839	80.831	87.4379	77.6178	83.1026	77.8855	93.3219	76.4421	82.5306
3480	87.7	84.528	91.0643	84.364	80.9405	87.4846	77.7817	83.1946	78.0067	93.3464	76.5572	82.6399
3480	87.8	84.6095	91.1183	84.4495	81.055	87.5365	77.9502	83.2975	78.1412	93.378	76.6763	82.7511
3480	87.8	84.696	91.1796	84.5405	81.1745	87.5946	78.1237	83.4115	78.2898	93.4173	76.7994	82.8643
3490	87.9	84.787	91.2478	84.6364	81.2987	87.6591	78.3016	83.5349	78.4508	93.4639	76.9264	82.9793
3490	88	84.8816	91.3216	84.7362	81.4269	87.7294	78.4835	83.6648	78.6211	93.5162	77.0568	83.0962
3490	88.1	84.978	91.3985	84.8378	81.558	87.804	78.6683	83.7976	78.7965	93.5717	77.1897	83.2144
3490	88.2	85.0747	91.4757	84.9388	81.6902	87.8801	78.8547	83.9291	78.972	93.6276	77.3243	83.3334
3490	88.3	85.17	91.5505	85.0373	81.8227	87.9552	79.0415	84.055	79.1425	93.6805	77.4595	83.4528
3500	88.4	85.2632	91.6208	85.1327	81.9547	88.0271	79.2275	84.1719	79.3039	93.7282	77.5952	83.5723
3500	88.4	85.3537	91.685	85.2245	82.086	88.0941	79.4121	84.2786	79.4542	93.7692	77.731	83.6916
3500	88.5	85.4423	91.743	85.3134	82.217	88.1553	79.5949	84.3761	79.5942	93.8041	77.8673	83.8106
3500	88.6	85.5304	91.7957	85.4017	82.3489	88.2116	79.7766	84.467	79.7259	93.8341	78.0049	83.9297
3500	88.6	85.6198	91.8453	85.4921	82.4834	88.2647	79.9582	84.5543	79.8526	93.8617	78.1448	84.0496
3510	88.7	85.7124	91.8942	85.5879	82.6224	88.3171	80.1412	84.6419	79.9786	93.8895	78.2886	84.1714
3510	88.8	85.8092	91.945	85.6915	82.7673	88.3717	80.3272	84.7337	80.1081	93.9204	78.4375	84.296
3510	88.9	85.9103	91.9991	85.8039	82.9182	88.4305	80.517	84.8327	80.2445	93.9562	78.5923	84.4241
3510	88.9	86.0151	92.0573	85.9244	83.0745	88.4946	80.7111	84.9404	80.3897	93.9972	78.7535	84.5556
3510	89	86.1221	92.1194	86.0513	83.2346	88.5644	80.9091	85.0563	80.5438	94.0427	78.9206	84.6902
3520	89.1	86.2298	92.1845	86.1816	83.3963	88.6389	81.1098	85.1784	80.7052	94.0907	79.0926	84.827
3520	89.2	86.3367	92.251	86.311	83.557	88.7161	81.3117	85.3039	80.8716	94.1387	79.2681	84.9645
3520	89.3	86.4425	92.3181	86.4366	83.715	88.7944	81.5135	85.4305	81.0412	94.1849	79.4457	85.1015
3520	89.4	86.5485	92.3869	86.5578	83.8709	88.8729	81.7151	85.5576	81.2137	94.2293	79.6255	85.2379
3520	89.5	86.6563	92.4589	86.6753	84.0265	88.9519	81.9169	85.6864	81.3906	94.2738	79.8077	85.3738
3530	89.6	86.7678	92.5354	86.7903	84.1841	89.0315	82.1199	85.8193	81.5739	94.3205	79.993	85.5097
3530	89.7	86.8847	92.6179	86.9052	84.3464	89.1125	82.3253	85.9589	81.7656	94.3722	80.1822	85.6465
3530	89.8	87.0079	92.707	87.0228	84.5158	89.196	82.5343	86.1072	81.9672	94.4309	80.3763	85.7851
3530	89.9	87.1372	92.8021	87.145	84.6936	89.2824	82.748	86.2656	82.1793	94.4981	80.5758	85.9265
3530	90.1	87.2716	92.9016	87.273	84.8795	89.3717	82.9667	86.4344	82.4015	94.5741	80.7808	86.0711
3530	90.2	87.4093	93.0026	87.4067	85.0722	89.4628	83.1902	86.6116	82.6312	94.6573	80.9908	86.219
3540	90.4	87.5488	93.1024	87.5461	85.2693	89.555	83.4175	86.7937	82.865	94.7449	81.2049	86.37
3540	90.5	87.6887	93.1985	87.6909	85.4685	89.6476	83.6476	86.9757	83.0983	94.8334	81.4221	86.5238
3540	90.6	87.8277	93.2888	87.8399	85.6669	89.7396	83.8789	87.152	83.3258	94.9182	81.6412	86.68
3540	90.8	87.9649	93.3714	87.9914	85.8621	89.8301	84.1097	87.3177	83.5432	94.9955	81.8607	86.8376
3540	90.9	88.1008	93.447	88.1448	86.0532	89.9195	84.3394	87.4703	83.749	95.0634	82.0801	86.9963
3550	91	88.237	93.5185	88.3015	86.2422	90.0099	84.569	87.6105	83.9446	95.1226	82.3002	87.1566
3550	91.1	88.3741	93.5892	88.4629	86.4317	90.1039	84.7998	87.7408	84.1329	95.1752	82.5221	87.3196
3550	91.2	88.5114	93.6609	88.6279	86.6234	90.2024	85.0324	87.864	84.3164	95.2226	82.7466	87.4854
3550	91.3	88.6471	93.7346	88.7951	86.8182	90.3053	85.2671	87.9833	84.4972	95.2662	82.974	87.6539
3550	91.4	88.779	93.8098	88.9612	87.016	90.4116	85.5037	88.1015	84.6766	95.307	83.2039	87.8242
3560	91.4	88.9042	93.8839	89.1205	87.2138	90.5174	85.7407	88.2215	84.8561	95.3452	83.4352	87.9942
3560	91.5	89.022	93.9551	89.2685	87.4087	90.6189	85.9767	88.3464	85.0375	95.3815	83.6671	88.1619
3560	91.6	89.1351	94.0239	89.4041	87.5997	90.7138	86.2115	88.4783	85.2228	95.4173	83.8993	88.3268
3560	91.7	89.2478	94.0923	89.5295	87.7872	90.8016	86.4453	88.6183	85.4141	95.4544	84.1324	88.4892
3560	91.8	89.3662	94.1636	89.6489	87.9728	90.8833	86.6795	88.7672	85.6134	95.4951	84.3678	88.6504
3570	92	89.4959	94.2415	89.7682	88.1592	90.9619	86.9158	88.926	85.8235	95.5422	84.6072	88.8123
3570	92.1	89.6421	94.3294	89.8935	88.3497	91.0413	87.1562	89.0956	86.0471	95.5986	84.8525	88.9772
3570	92.2	89.8081	94.4304	90.0309	88.548	91.1262	87.4033	89.2772	86.287	95.6668	85.1061	89.1475
3570	92.4	89.9957	94.5475	90.1864	88.7585	91.2223	87.6598	89.4721	86.5463	95.7497	85.37	89.3262
3570	92.6	90.2026	94.6809	90.3639	88.9843	91.3342	87.9276	89.6801	86.8253	95.848	85.6457	89.5154
3580	92.8	90.4211	94.8256	90.5601	89.2235	91.4622	88.2054	89.8982	87.1201	95.9583	85.9318	89.7147
3580	93	90.6416	94.9732	90.7677	89.4709	91.603	88.4898	90.1217	87.4236	96.0747	86.2254	89.9215
3580	93.2	90.8558	95.1167	90.9793	89.7217	91.7525	88.7771	90.3455	87.7288	96.1914	86.5231	90.1332
3580	93.4	91.0563	95.2487	91.1857	89.9693	91.9047	89.063	90.5651	88.0289	96.3026	86.8211	90.3457
3580	93.5	91.2381	95.3624	91.3767	90.2063	92.0521	89.3424	90.7769	88.3178	96.4028	87.1151	90.5546
3590	93.7	91.4025	95.457	91.5486	90.4297	92.1899	89.6131	90.9793	88.5928	96.4899	87.4032	90.7572
3590	93.9	91.5554	95.5373	91.7043	90.6417	92.3173	89.8754	91.1717	88.8539	96.5652	87.6856	90.9539
3590	94	91.7045	95.6099	91.8495	90.8462	92.4357	90.1313	91.3547	89.1024	96.6313	87.9639	91.1461
3590	94.2	91.856	95.6806	91.9896	91.0468	92.547	90.3828	91.5293	89.3399	96.6911	88.2396	91.3353
3590	94.3	92.0159	95.7555	92.1308	91.2478	92.6541	90.6323	91.6979	89.5693	96.7481	88.5148	91.5233
3590	94.5	92.1885	95.84	92.2795	91.4537	92.7613	90.8833	91.8631	89.7945	96.8063	88.7918	91.7128
3600	94.6	92.3752	95.9374	92.4405	91.6681	92.8723	91.1383	92.0275	90.0192	96.8688	89.0728	91.9059
3600	94.8	92.5742	96.0487	92.6162	91.8925	92.9905	91.3991	92.193	90.2459	96.9374	89.3588	92.1041
3600	94.9	92.7805	96.1709	92.8048	92.1255	93.1167	91.6657	92.3598	90.4754	97.0115	89.6494	92.3074
3600	95.1	92.9865	96.2975	93.0001	92.3618	93.2488	91.9351	92.5269	90.7059	97.0881	89.9424	92.5136
3600	95.2	93.1864	96.4227	93.1961	92.597	93.3842	92.2042	92.6932	90.9367	97.1647	90.2354	92.7204
3610	95.4	93.3768	96.5433	93.3888	92.8281	93.5216	92.4709	92.8586	91.168	97.2401	90.5269	92.926
3610	95.5	93.5543	96.6543	93.5721	93.0506	93.6578	92.7315	93.0227	91.3995	97.3125	90.8146	93.1275
3610	95.7	93.7165	96.7517	93.7399	93.2601	93.7884	92.9824	93.1851	91.6302	97.3799	91.0961	93.3217
3610	95.8	93.8644	96.8343	93.8897	93.4545	93.9109	93.2211	93.3457	91.8601	97.4416	91.37	93.5066
3610	96	94.0014	96.9043	94.0233	93.6351	94.0246	93.4475	93.5038	92.0886	97.4983	91.6362	93.682
3620	96.1	94.1299	96.963	94.1418	93.8023	94.1285	93.6612	93.6577	92.3136	97.5497	91.894	93.8475
3620	96.2	94.2503	97.0087	94.2428	93.9536	94.2192	93.861	93.8057	92.5314	97.594	92.1418	94.0013
3620	96.3	94.366	97.043	94.3273	94.0893	94.2956	94.0474	93.9479	92.7409	97.6315	92.3792	94.1436
3620	96.4	94.483	97.0711	94.4014	94.2135	94.3602	94.2245	94.0857	92.944	97.6651	92.6081	94.2765
3620	96.5	94.6076	97.0995	94.4725	94.3321	94.4169	94.3968	94.2206	93.1433	97.6985	92.8309	94.4035
3630	96.6	94.7454	97.1352	94.5496	94.4522	94.4717	94.5698	94.3547	93.3424	97.7357	93.0512	94.529
3630	96.7	94.901	97.185	94.6419	94.5815	94.5313	94.749	94.4898	93.5455	97.7809	93.2729	94.6574
3630	96.9	95.0765	97.2542	94.7569	94.7268	94.6024	94.9386	94.6279	93.7563	97.8374	93.4994	94.7929
3630	97	95.2711	97.3461	94.8996	94.8935	94.6905	95.1413	94.7706	93.9779	97.9076	93.7335	94.9384
3630	97.1	95.4792	97.4593	95.07	95.0829	94.7985	95.3569	94.9187	94.2113	97.9915	93.9763	95.0946
3640	97.3	95.6907	97.5875	95.2612	95.2909	94.9249	95.5818	95.0718	94.4547	98.0863	94.2261	95.2594
3640	97.5	95.8904	97.7172	95.4576	95.5056	95.0617	95.8075	95.2277	94.702	98.1848	94.4778	95.4263
3640	97.6	96.063	97.8329	95.6388	95.7106	95.1967	96.0229	95.383	94.9454	98.2777	94.7235	95.5862
3640	97.7	96.1998	97.9241	95.7904	95.8938	95.3195	96.2198	95.5345	95.1787	98.3585	94.957	95.732
3640	97.8	96.2978	97.9842	95.9022	96.0456	95.4214	96.3925	95.6798	95.3975	98.4225	95.1733	95.8581
3640	97.9	96.3592	98.01	95.9671	96.159	95.4951	96.5372	95.8182	95.6	98.4676	95.3685	95.9604
3650	98	96.3966	98.0083	95.9911	96.2371	95.541	96.6567	95.9511	95.7895	98.4975	95.5433	96.0402
3650	98.1	96.4284	97.9935	95.9907	96.2919	95.5662	96.7591	96.0802	95.9723	98.5195	95.7029	96.1035
3650	98.1	96.472	97.9807	95.9853	96.3376	95.5808	96.8538	96.2056	96.1529	98.541	95.8534	96.1584
3650	98.2	96.5414	97.9829	95.9938	96.3886	95.5952	96.9498	96.3256	96.3338	98.5677	96.0011	96.2133
3650	98.3	96.6458	98.0113	96.0334	96.4587	95.6206	97.0558	96.4382	96.5158	98.6042	96.1522	96.2764
3660	98.4	96.787	98.0717	96.1163	96.558	95.6659	97.1775	96.5405	96.698	98.6527	96.3116	96.3543
3660	98.5	96.9573	98.1621	96.244	96.689	95.7351	97.316	96.6291	96.8758	98.7111	96.4801	96.4492
3660	98.6	97.1422	98.2735	96.4091	96.8471	95.8266	97.4676	96.7013	97.043	98.7746	96.6558	96.5596
3660	98.7	97.3214	98.391	96.5947	97.02	95.9332	97.6243	96.755	97.1923	98.8359	96.8334	96.6796
3660	98.8	97.469	98.4904	96.7698	97.1838	96.0385	97.7714	96.7885	97.3138	98.883	97.0022	96.797
3670	98.8	97.5668	98.5524	96.906	97.3163	96.1252	97.895	96.8034	97.4029	98.9071	97.1519	96.8993
3670	98.8	97.612	98.5725	96.992	97.4087	96.1856	97.9901	96.8061	97.4643	98.9082	97.2786	96.9806
3670	98.8	97.6117	98.5553	97.027	97.4607	96.2182	98.0573	96.8055	97.5085	98.892	97.3826	97.0393
3670	98.8	97.5789	98.5104	97.0171	97.4774	96.2258	98.1007	96.8111	97.5486	98.8668	97.467	97.0767
3670	98.7	97.5313	98.4521	96.9762	97.4699	96.2153	98.1278	96.8315	97.5977	98.8427	97.5378	97.0975
3680	98.7	97.4858	98.3944	96.9202	97.4505	96.1953	98.1467	96.8715	97.6652	98.8284	97.6013	97.1078
3680	98.7	97.4539	98.3452	96.8604	97.4272	96.1715	98.1627	96.9311	97.7538	98.8273	97.6618	97.112
3680	98.8	97.4432	98.3095	96.8058	97.4062	96.1475	98.1797	97.0064	97.8613	98.8399	97.7222	97.1135
3680	98.8	97.4604	98.2928	96.7675	97.395	96.1288	98.2021	97.0914	97.9839	98.8658	97.786	97.117
3680	98.9	97.5075	98.2977	96.7537	97.3995	96.1197	98.2333	97.1787	98.1155	98.9029	97.8555	97.1263
3690	99	97.58	98.3216	96.7657	97.4202	96.1211	98.273	97.2597	98.2468	98.9462	97.9302	97.1426
3690	99	97.6705	98.3589	96.8007	97.455	96.1316	98.3195	97.3269	98.3683	98.9899	98.0079	97.1654
3690	99.1	97.7671	98.3992	96.8488	97.4961	96.146	98.3675	97.3734	98.4699	99.0263	98.084	97.1915
3690	99.1	97.8564	98.4295	96.8941	97.5314	96.1553	98.409	97.395	98.5428	99.0474	98.1519	97.2146
3690	99.2	97.9344	98.4467	96.9315	97.5577	96.1568	98.4419	97.3928	98.5868	99.0518	98.2091	97.2327
3700	99.2	98.0043	98.4571	96.9675	97.5818	96.1555	98.4703	97.3719	98.609	99.0447	98.2586	97.249
3700	99.2	98.0676	98.4659	97.0067	97.6093	96.1568	98.4981	97.3389	98.6172	99.0312	98.3036	97.2663
3700	99.2	98.1204	98.4724	97.046	97.6391	96.1612	98.5254	97.2996	98.6164	99.0135	98.3446	97.2843
3700	99.2	98.1573	98.4721	97.0775	97.666	96.1658	98.5494	97.2594	98.6099	98.9916	98.3802	97.3004
3700	99.2	98.1752	98.4624	97.0952	97.6855	96.1677	98.568	97.2229	98.6012	98.9658	98.4099	97.3126
3700	99.1	98.1741	98.443	97.0972	97.695	96.165	98.5803	97.193	98.5929	98.9368	98.4345	97.32
3710	99.1	98.1578	98.4179	97.0864	97.696	96.1582	98.5876	97.1712	98.5881	98.9063	98.4564	97.3236
3710	99.1	98.1334	98.3947	97.0719	97.6947	96.1516	98.5944	97.1588	98.5914	98.8784	98.4799	97.3268
3710	99.1	98.1076	98.381	97.0632	97.6982	96.1501	98.605	97.1567	98.6063	98.8571	98.5096	97.3337
3710	99.1	98.0838	98.3804	97.0659	97.7105	96.1566	98.6223	97.1645	98.6339	98.8446	98.5481	97.3468
3710	99.1	98.0639	98.3937	97.0819	97.7336	96.1721	98.6477	97.1816	98.6742	98.842	98.5965	97.3672
3720	99.1	98.05	98.4208	97.1124	97.769	96.1976	98.6821	97.2083	98.7274	98.8507	98.6556	97.3963
3720	99.1	98.0464	98.4644	97.1626	97.822	96.2365	98.729	97.2458	98.7961	98.8741	98.7279	97.4367
3720	99.1	98.0585	98.5294	97.2412	97.9009	96.2954	98.7934	97.2956	98.8838	98.9164	98.817	97.4933
3720	99.2	98.0852	98.6137	97.349	98.0077	96.3766	98.8765	97.3571	98.9893	98.9781	98.923	97.5674
3720	99.3	98.1166	98.7043	97.4723	98.1321	96.4735	98.9715	97.427	99.1045	99.0521	99.0392	97.6535
3730	99.3	98.1412	98.7839	97.5903	98.2568	96.5737	99.067	97.4997	99.2179	99.1277	99.1552	97.7423
3730	99.4	98.1531	98.8405	97.6881	98.3681	96.6663	99.153	97.5693	99.3195	99.1955	99.2617	97.8252
3730	99.4	98.1539	98.871	97.7616	98.4603	96.7457	99.2243	97.6291	99.402	99.2494	99.3526	97.8975
3730	99.4	98.1449	98.8734	97.8083	98.5277	96.8068	99.2759	97.6709	99.4571	99.2828	99.4221	97.954
3730	99.4	98.1231	98.8424	97.821	98.5614	96.8415	99.3002	97.6858	99.475	99.2878	99.4622	97.9875
3740	99.4	98.087	98.7755	97.7952	98.5549	96.8431	99.2917	97.6684	99.4499	99.2592	99.467	97.992
3740	99.3	98.0361	98.6726	97.7286	98.5045	96.8074	99.2474	97.6162	99.38	99.1952	99.433	97.9634
3740	99.2	97.9686	98.5326	97.6165	98.4056	96.7292	99.165	97.5302	99.2667	99.0953	99.3576	97.8976
3740	99.1	97.8863	98.3586	97.4579	98.2582	96.6067	99.0455	97.4161	99.1173	98.9639	99.2422	97.7937
3740	98.9	97.7983	98.1635	97.2648	98.0733	96.4468	98.898	97.2845	98.9474	98.8125	99.0952	97.6581
3750	98.8	97.7165	97.9648	97.0563	97.8692	96.2628	98.7365	97.148	98.776	98.6563	98.93	97.5019
3750	98.6	97.6487	97.7755	96.847	97.6612	96.0671	98.5735	97.0183	98.6188	98.5083	98.7592	97.3361
3750	98.5	97.5976	97.602	96.6438	97.4581	95.8677	98.417	96.9052	98.4866	98.3766	98.5918	97.1685
3750	98.4	97.5665	97.4493	96.4523	97.2673	95.6719	98.2732	96.8167	98.3875	98.2675	98.4359	97.0062
3750	98.4	97.5628	97.3263	96.284	97.1001	95.4902	98.1503	96.7582	98.3282	98.1871	98.3003	96.8583
3750	98.4	97.5945	97.2434	96.1544	96.9705	95.3352	98.0568	96.7316	98.3124	98.1403	98.194	96.7344
3760	98.4	97.6646	97.2057	96.0742	96.8869	95.2164	97.9977	96.7341	98.3377	98.1276	98.1218	96.6411
3760	98.5	97.7651	97.2069	96.04	96.8465	95.1345	97.9696	96.7585	98.3937	98.1423	98.0815	96.5778
3760	98.5	97.8836	97.2349	96.0414	96.8394	95.0846	97.9647	96.7962	98.4674	98.1746	98.0666	96.5395
3760	98.6	98.0094	97.2802	96.0693	96.8577	95.0619	97.9762	96.8399	98.5482	98.2165	98.0709	96.5212
3760	98.7	98.1315	97.3317	96.1122	96.8906	95.0596	97.9968	96.8831	98.6269	98.2604	98.087	96.5161
3770	98.7	98.2378	97.377	96.1542	96.9241	95.0672	98.0173	96.9208	98.6953	98.2986	98.1063	96.5159
3770	98.8	98.322	97.4082	96.1846	96.9485	95.0762	98.0317	96.9505	98.7501	98.327	98.1224	96.5139
3770	98.8	98.3842	97.425	96.2015	96.9616	95.0832	98.0389	96.9717	98.7923	98.3459	98.1335	96.5082
3770	98.9	98.4274	97.4292	96.2061	96.9639	95.0862	98.0396	96.9849	98.8244	98.357	98.1393	96.4983
3770	98.9	98.455	97.4228	96.1991	96.9563	95.0834	98.0347	96.9914	98.8488	98.3619	98.14	96.484
3780	98.9	98.4739	97.4107	96.1852	96.943	95.0751	98.0265	96.9932	98.869	98.3634	98.1378	96.4673
3780	98.9	98.4936	97.4016	96.1742	96.9326	95.0656	98.0204	96.993	98.8899	98.3662	98.1372	96.4527
3780	98.9	98.5223	97.4038	96.1774	96.935	95.061	98.0218	96.9926	98.9149	98.3741	98.1429	96.4456
3780	98.9	98.5635	97.4214	96.2017	96.9562	95.0658	98.0342	96.9921	98.9439	98.3883	98.1581	96.4495
3780	98.9	98.6135	97.4515	96.2455	96.9953	95.0798	98.0564	96.9895	98.9725	98.4062	98.1819	96.4644
3790	98.9	98.6645	97.4866	96.3014	97.046	95.0999	98.0841	96.9822	98.9946	98.4228	98.2109	96.4872
3790	99	98.7103	97.5209	96.3631	97.1033	95.1235	98.1138	96.969	99.0068	98.4348	98.2423	96.5152
3790	99	98.7441	97.5485	96.4233	97.1604	95.1479	98.1421	96.9493	99.0063	98.4394	98.2727	96.5449
3790	99	98.7589	97.5615	96.471	97.2077	95.168	98.1636	96.923	98.9911	98.4332	98.2976	96.5711
3790	98.9	98.7504	97.5545	96.4972	97.2365	95.1788	98.1742	96.8913	98.9614	98.4146	98.3132	96.5891
3800	98.9	98.7188	97.5254	96.4966	97.2417	95.1773	98.1714	96.8562	98.9198	98.3841	98.3171	96.5957
3800	98.9	98.669	97.4767	96.47	97.2232	95.1632	98.1559	96.8204	98.8716	98.3446	98.31	96.5902
3800	98.8	98.6096	97.4159	96.4242	97.1866	95.1393	98.1312	96.7875	98.8237	98.3015	98.2951	96.575
3800	98.8	98.5504	97.3519	96.3689	97.1403	95.1105	98.1023	96.7604	98.7834	98.2606	98.2768	96.5538
3800	98.7	98.5005	97.2938	96.3145	97.0939	95.0819	98.0746	96.7414	98.7566	98.2275	98.2602	96.5311
3800	98.7	98.4646	97.2468	96.2683	97.0541	95.057	98.0519	96.7314	98.7459	98.2053	98.2489	96.5104
3810	98.7	98.4449	97.2142	96.235	97.0262	95.0383	98.0367	96.7296	98.7514	98.195	98.2451	96.4944
3810	98.7	98.4395	97.1949	96.2155	97.0115	95.0258	98.0294	96.7338	98.7699	98.195	98.2492	96.4841
3810	98.7	98.4433	97.1847	96.2058	97.0078	95.017	98.0279	96.7407	98.7959	98.2016	98.2592	96.4785
3810	98.7	98.4535	97.1822	96.206	97.0149	95.0118	98.0318	96.7481	98.8256	98.2122	98.2747	96.4779
3810	98.7	98.4672	97.1856	96.2152	97.032	95.0105	98.0404	96.7539	98.8552	98.2246	98.2947	96.4824
3820	98.7	98.4778	97.1886	96.2258	97.0517	95.0095	98.0496	96.7562	98.8794	98.234	98.3153	96.4889
3820	98.7	98.4814	97.1866	96.2318	97.0679	95.006	98.0561	96.7549	98.8958	98.2375	98.3333	96.4944
3820	98.7	98.4785	97.1794	96.2322	97.0788	95.0002	98.0592	96.752	98.9057	98.2354	98.3482	96.4981
3820	98.7	98.4717	97.169	96.229	97.0851	94.994	98.0598	96.7502	98.9127	98.2299	98.3605	96.5004
3820	98.7	98.4652	97.1598	96.2275	97.0908	94.9911	98.0608	96.7521	98.9214	98.2244	98.3725	96.5032
3830	98.7	98.4618	97.1548	96.2318	97.099	94.9944	98.0642	96.7586	98.9343	98.2214	98.386	96.5083
3830	98.8	98.461	97.1537	96.2411	97.1092	95.0034	98.0698	96.7686	98.9511	98.2209	98.4007	96.5149
3830	98.8	98.4611	97.1538	96.2523	97.1188	95.0154	98.076	96.7802	98.9699	98.2219	98.4151	96.5214
3830	98.8	98.4598	97.1516	96.2605	97.1242	95.0264	98.0808	96.7914	98.988	98.2227	98.4273	96.5255
3830	98.8	98.4566	97.146	96.2637	97.1241	95.0337	98.0835	96.7997	99.003	98.2219	98.4361	96.5263
3840	98.8	98.4519	97.1368	96.2614	97.1187	95.0357	98.0838	96.8026	99.0125	98.2187	98.4413	96.5236
3840	98.8	98.4479	97.1266	96.2572	97.1111	95.033	98.0833	96.7983	99.015	98.2129	98.4439	96.519
3840	98.8	98.4481	97.1202	96.2579	97.1076	95.0297	98.0853	96.7855	99.0105	98.206	98.4467	96.5161
3840	98.7	98.4483	97.113	96.2589	97.1044	95.0236	98.087	96.7619	98.9943	98.1944	98.4475	96.5132
3840	98.7	98.4409	97.0962	96.2491	97.0925	95.0086	98.0823	96.727	98.9629	98.1736	98.4417	96.5053
3850	98.7	98.4261	97.0695	96.2277	97.0715	94.9845	98.0704	96.6848	98.9199	98.1447	98.4296	96.4919
3850	98.7	98.4082	97.038	96.2007	97.0469	94.9558	98.0545	96.6405	98.873	98.1123	98.4144	96.4756
3850	98.6	98.3912	97.0072	96.1754	97.025	94.9283	98.0384	96.599	98.8297	98.0813	98.4001	96.4597
3850	98.6	98.3762	96.9796	96.1553	97.0092	94.9051	98.0243	96.563	98.7942	98.0543	98.389	96.446
3850	98.6	98.36	96.952	96.1368	96.9961	94.8849	98.0105	96.533	98.7665	98.0305	98.3797	96.433
3860	98.5	98.3407	96.9215	96.1153	96.9816	94.8644	97.9947	96.5091	98.7461	98.0086	98.3704	96.4185
3860	98.5	98.3195	96.8882	96.0899	96.9644	94.8426	97.9771	96.4922	98.7339	97.9894	98.3609	96.4017
3860	98.5	98.2987	96.8543	96.0615	96.9444	94.8189	97.9585	96.4831	98.7306	97.9738	98.3514	96.3829
3860	98.5	98.2828	96.8238	96.0342	96.9247	94.7949	97.9412	96.482	98.737	97.9636	98.3434	96.3639
3860	98.5	98.2761	96.8021	96.0138	96.9097	94.7735	97.9285	96.4884	98.7533	97.9604	98.3391	96.3475
3860	98.5	98.2816	96.7931	96.0057	96.9035	94.7579	97.923	96.5009	98.7784	97.9653	98.3405	96.3363
3870	98.5	98.2971	96.795	96.0084	96.9048	94.7481	97.9242	96.5169	98.8084	97.9761	98.3466	96.3303
3870	98.6	98.3137	96.7972	96.0088	96.9026	94.7367	97.9254	96.5333	98.8364	97.9867	98.3519	96.3235
3870	98.6	98.3273	96.794	95.9991	96.8911	94.7193	97.9224	96.5501	98.8607	97.9943	98.353	96.3125
3870	98.6	98.3426	96.79	95.9847	96.8753	94.6995	97.9182	96.5693	98.8855	98.002	98.3526	96.2995
3870	98.6	98.3638	96.7903	95.9723	96.8616	94.6822	97.9162	96.5918	98.9145	98.0125	98.354	96.2877
3880	98.6	98.3929	96.7979	95.9672	96.8551	94.6711	97.9187	96.6167	98.9487	98.0268	98.3593	96.2798
3880	98.7	98.4285	96.8122	95.9707	96.8572	94.6676	97.9263	96.6418	98.9866	98.0441	98.369	96.2768
3880	98.7	98.4662	96.8289	95.9788	96.865	94.6692	97.9362	96.6641	99.0242	98.0612	98.3811	96.2773
3880	98.7	98.5034	96.8456	95.9898	96.8768	94.6741	97.9467	96.6815	99.0584	98.0757	98.3941	96.2801
3880	98.7	98.5393	96.8626	96.0049	96.8933	94.6822	97.9578	96.6926	99.0879	98.0875	98.4079	96.2858
3890	98.8	98.5716	96.8791	96.0241	96.9141	94.6926	97.969	96.6963	99.1107	98.0956	98.4221	96.294
3890	98.8	98.5974	96.8935	96.0459	96.9371	94.7035	97.979	96.6914	99.1249	98.0993	98.4354	96.3039
3890	98.8	98.6127	96.9027	96.0667	96.9583	94.7118	97.9856	96.677	99.1283	98.0972	98.4459	96.3134
3890	98.8	98.6133	96.9016	96.0799	96.9714	94.7131	97.9856	96.653	99.1187	98.0873	98.4509	96.3189
3890	98.8	98.5953	96.8841	96.0759	96.9675	94.7015	97.9747	96.6204	99.0949	98.0675	98.4465	96.3154
3900	98.7	98.5588	96.8464	96.0475	96.9403	94.6723	97.9501	96.5818	99.0584	98.0375	98.4302	96.2992
3900	98.7	98.5119	96.7936	95.9978	96.8924	94.6274	97.9142	96.5424	99.0158	98.0014	98.404	96.2711
3900	98.6	98.4667	96.7356	95.9371	96.8325	94.5734	97.8731	96.5072	98.9754	97.9655	98.3731	96.2356
3900	98.6	98.4328	96.6813	95.8756	96.7698	94.5172	97.8329	96.4797	98.9435	97.935	98.3425	96.1978
3900	98.6	98.4179	96.6387	95.8235	96.7141	94.4663	97.7996	96.462	98.9252	97.9141	98.3173	96.1633
3910	98.6	98.4246	96.6117	95.7864	96.6711	94.4255	97.7763	96.4548	98.9219	97.9043	98.3005	96.1356
3910	98.6	98.4514	96.5999	95.7648	96.6425	94.396	97.7633	96.4572	98.9322	97.9046	98.2924	96.1162
3910	98.6	98.4965	96.6039	95.7608	96.6312	94.3797	97.7612	96.468	98.9548	97.9142	98.2939	96.1064
3910	98.6	98.5569	96.6243	95.777	96.64	94.3784	97.7707	96.4851	98.988	97.9327	98.3058	96.108
3910	98.7	98.6251	96.6574	95.8104	96.6667	94.3903	97.7897	96.5056	99.028	97.9576	98.3264	96.12
3910	98.7	98.6912	96.6961	95.8534	96.7048	94.4103	97.8137	96.5258	99.069	97.9844	98.3522	96.1389
3920	98.7	98.7463	96.7325	95.897	96.7459	94.4321	97.8376	96.5426	99.1058	98.0088	98.3786	96.16
3920	98.8	98.7838	96.7595	95.9318	96.7811	94.4493	97.8564	96.5541	99.1345	98.0269	98.4013	96.1784
3920	98.8	98.801	96.772	95.9502	96.803	94.4563	97.8663	96.5597	99.1528	98.0364	98.4168	96.1895
3920	98.8	98.8005	96.7702	95.9506	96.8089	94.4511	97.8662	96.5601	99.1618	98.0374	98.4237	96.1917
3920	98.8	98.7896	96.7584	95.9374	96.8016	94.436	97.8586	96.5572	99.1643	98.0322	98.4238	96.1862
3930	98.8	98.7755	96.7427	95.9177	96.7862	94.4149	97.8472	96.5523	99.1639	98.0239	98.4196	96.1756
3930	98.8	98.7644	96.7282	95.8983	96.768	94.3926	97.8356	96.5466	99.1631	98.0151	98.4138	96.1632
3930	98.8	98.7596	96.7174	95.8831	96.7509	94.3725	97.8261	96.5407	99.1633	98.0073	98.4085	96.1513
3930	98.8	98.761	96.7097	95.872	96.7351	94.3554	97.8188	96.5344	99.1639	97.9999	98.4037	96.1404
3930	98.8	98.7683	96.7043	95.8645	96.7213	94.3417	97.8132	96.5274	99.1642	97.9926	98.3994	96.1309
3940	98.8	98.7813	96.7015	95.862	96.7116	94.3327	97.8099	96.52	99.1649	97.9859	98.3966	96.1239
3940	98.8	98.7979	96.7004	95.8639	96.7063	94.3282	97.8087	96.5119	99.1658	97.9801	98.3954	96.1195
3940	98.8	98.8146	96.6981	95.8667	96.7035	94.326	97.8076	96.5026	99.1658	97.9739	98.3945	96.1164
3940	98.8	98.8286	96.6923	95.8671	96.7008	94.3234	97.8052	96.4919	99.1643	97.9667	98.3926	96.1131
3940	98.8	98.8389	96.682	95.8635	96.6971	94.319	97.8008	96.4804	99.1619	97.9587	98.3893	96.1088
3950	98.8	98.8452	96.667	95.8543	96.691	94.311	97.7939	96.4688	99.1591	97.9503	98.3842	96.1024
3950	98.8	98.8487	96.648	95.8393	96.6819	94.2985	97.7845	96.4581	99.1569	97.942	98.3774	96.0935
3950	98.7	98.8526	96.6281	95.8213	96.6716	94.2826	97.7741	96.4491	99.1566	97.935	98.3703	96.0827
3950	98.7	98.8598	96.611	95.8046	96.6629	94.2655	97.7645	96.4423	99.1593	97.9308	98.3645	96.0718
3950	98.7	98.8725	96.5994	95.793	96.6581	94.2496	97.7577	96.4378	99.1655	97.9301	98.3616	96.0624
3960	98.7	98.8909	96.5947	95.7883	96.6581	94.2364	97.7545	96.4353	99.1745	97.9332	98.3624	96.0557
3960	98.7	98.9136	96.5959	95.7899	96.6619	94.2261	97.7545	96.4343	99.1851	97.9389	98.3668	96.0517
3960	98.7	98.9386	96.6009	95.7959	96.6678	94.2181	97.7566	96.4341	99.1955	97.9459	98.3739	96.0499
3960	98.8	98.9644	96.6083	95.8051	96.6749	94.2121	97.7604	96.4348	99.2053	97.9535	98.3834	96.0502
3960	98.8	98.9892	96.6162	95.8156	96.6817	94.2074	97.7648	96.4361	99.2139	97.9606	98.3945	96.0517
3960	98.8	99.0112	96.6223	95.8247	96.6866	94.2027	97.7686	96.4381	99.2211	97.9663	98.4056	96.0532
3970	98.8	99.0297	96.6251	95.8306	96.6885	94.1972	97.7712	96.4408	99.2276	97.9701	98.4156	96.0538
3970	98.8	99.0452	96.6245	95.8334	96.6882	94.1908	97.7727	96.4448	99.2347	97.9726	98.4242	96.0531
3970	98.8	99.0581	96.6207	95.8335	96.6864	94.184	97.7736	96.45	99.2434	97.9743	98.4316	96.0512
3970	98.8	99.0689	96.6135	95.8306	96.6836	94.1764	97.7735	96.4556	99.2537	97.975	98.4375	96.0478
3970	98.8	99.0776	96.6028	95.8246	96.6798	94.1677	97.7718	96.4606	99.2649	97.9744	98.4421	96.0428
3980	98.8	99.085	96.5894	95.8164	96.6757	94.1581	97.7686	96.464	99.2765	97.9725	98.4454	96.0362
3980	98.8	99.0923	96.575	95.8079	96.6727	94.1486	97.7642	96.4646	99.2877	97.9692	98.4482	96.0289
3980	98.8	99.0997	96.5605	95.8006	96.6716	94.1397	97.7587	96.461	99.2972	97.9646	98.4511	96.022
3980	98.8	99.1065	96.5458	95.7945	96.6719	94.1311	97.7514	96.4513	99.3018	97.9573	98.4544	96.016
3980	98.8	99.1113	96.5302	95.7862	96.6706	94.1209	97.7411	96.4362	99.3004	97.9465	98.4567	96.0098
3990	98.8	99.1144	96.5151	95.7765	96.667	94.1097	97.7289	96.4177	99.2944	97.9336	98.4579	96.0034
3990	98.8	99.1184	96.5026	95.7706	96.665	94.1003	97.7181	96.3982	99.2878	97.9214	98.4597	95.998
3990	98.8	99.1194	96.4901	95.7624	96.659	94.0888	97.7045	96.3751	99.2743	97.9059	98.46	95.9921
3990	98.8	99.1192	96.4796	95.7531	96.6489	94.0763	97.6908	96.3529	99.2583	97.8898	98.458	95.9856
3990	98.8	99.1183	96.472	95.7427	96.6343	94.0629	97.6786	96.3354	99.243	97.875	98.4539	95.9778
4000	98.8	99.1187	96.469	95.7309	96.6142	94.0493	97.671	96.3305	99.2373	97.866	98.4457	95.966
4000	98.8	99.1318	96.4825	95.7445	96.6079	94.0504	97.681	96.3421	99.2535	97.8741	98.4429	95.9588
4000	98.8	99.148	96.4991	95.7668	96.6075	94.0556	97.6943	96.3537	99.2706	97.8839	98.4436	95.954
4000	0	0	0	0	0	0	0	0	0	0	0	0

## Sheet: Figure2
ASDF	1	74954048	30389	301.889	CSDF	1	353651392	30389	301.889	KSDF	1	-9836416	30389	301.889	BSDF	1	378148224	30389	301.889	OSDF	1	-9493760	30389	301.889	SSDF	1	-108668608	30389	301.889
	2	66154304	30384.1	301.839		2	324723712	30384.1	301.839		2	-7137984	30384.1	301.839		2	334561408	30384.1	301.839		2	19635200	30384.1	301.839		2	-91057344	30384.1	301.839
	3	57539712	30379.1	301.79		3	299562176	30379.1	301.79		3	-6429184	30379.1	301.79		3	285089152	30379.1	301.79		3	53154944	30379.1	301.79		3	-76132608	30379.1	301.79
	4	60522176	30374.1	301.741		4	278992640	30374.1	301.741		4	-9450112	30374.1	301.741		4	238308416	30374.1	301.741		4	89308032	30374.1	301.741		4	-67356032	30374.1	301.741
	5	80347072	30369.2	301.691		5	263716736	30369.2	301.691		5	-17072832	30369.2	301.691		5	200738112	30369.2	301.691		5	123987328	30369.2	301.691		5	-64624576	30369.2	301.691
	6	114088512	30364.2	301.642		6	253814464	30364.2	301.642		6	-28367744	30364.2	301.642		6	175248768	30364.2	301.642		6	152185216	30364.2	301.642		6	-64108224	30364.2	301.642
	7	152455360	30359.3	301.593		7	248599168	30359.3	301.593		7	-40546304	30359.3	301.593		7	161088960	30359.3	301.593		7	170131584	30359.3	301.593		7	-59728256	30359.3	301.593
	8	184324096	30354.3	301.543		8	246875456	30354.3	301.543		8	-49846400	30354.3	301.543		8	155232832	30354.3	301.543		8	177165824	30354.3	301.543		8	-45756800	30354.3	301.543
	9	201721920	30349.3	301.494		9	247414720	30349.3	301.494		9	-52937664	30349.3	301.494		9	154204224	30349.3	301.494		9	176430336	30349.3	301.494		9	-19469120	30349.3	301.494
	10	202909824	30344.4	301.445		10	249334336	30344.4	301.445		10	-48171648	30344.4	301.445		10	155462976	30344.4	301.445		10	173964160	30344.4	301.445		10	17313728	30344.4	301.445
	11	192284672	30339.4	301.396		11	252129408	30339.4	301.396		11	-36092928	30339.4	301.396		11	157814784	30339.4	301.396		11	176479872	30339.4	301.396		11	58507072	30339.4	301.396
	12	177437440	30334.4	301.346		12	255318080	30334.4	301.346		12	-19021312	30334.4	301.346		12	160901056	30334.4	301.346		12	188731136	30334.4	301.346		12	95796288	30334.4	301.346
	13	165075264	30329.5	301.297		13	257918720	30329.5	301.297		13	18048	30329.5	301.297		13	164298688	30329.5	301.297		13	211575680	30329.5	301.297		13	121576768	30329.5	301.297
	14	157956096	30324.5	301.248		14	258133504	30324.5	301.248		14	18435200	30324.5	301.248		14	166889216	30324.5	301.248		14	241561344	30324.5	301.248		14	131553408	30324.5	301.248
	15	154328256	30319.6	301.198		15	253564032	30319.6	301.198		15	34720192	30319.6	301.198		15	166912832	30319.6	301.198		15	272201856	30319.6	301.198		15	125930432	30319.6	301.198
	16	149970368	30314.6	301.149		16	242036608	30314.6	301.149		16	48342912	30314.6	301.149		16	162669440	30314.6	301.149		16	296378496	30314.6	301.149		16	108780032	30314.6	301.149
	17	141534400	30309.6	301.1		17	222779840	30309.6	301.1		17	59089344	30309.6	301.1		17	153441600	30309.6	301.1		17	308842112	30309.6	301.1		17	86013760	30309.6	301.1
	18	129222656	30304.7	301.051		18	197436288	30304.7	301.051		18	66332864	30304.7	301.051		18	140088768	30304.7	301.051		18	307799040	30304.7	301.051		18	62981760	30304.7	301.051
	19	117207232	30299.7	301.001		19	170352000	30299.7	301.001		19	68758656	30299.7	301.001		19	124956992	30299.7	301.001		19	295022976	30299.7	301.001		19	42822144	30299.7	301.001
	20	111434368	30294.7	300.952		20	147821184	30294.7	300.952		20	64782336	30294.7	300.952		20	111122176	30294.7	300.952		20	274613760	30294.7	300.952		20	26225664	30294.7	300.952
	21	115889280	30289.8	300.903		21	136383872	30289.8	300.903		21	53480128	30289.8	300.903		21	101336128	30289.8	300.903		21	251110144	30289.8	300.903		21	12524992	30289.8	300.903
	22	129305024	30284.8	300.853		22	140710336	30284.8	300.853		22	35511488	30284.8	300.853		22	97174080	30284.8	300.853		22	227872512	30284.8	300.853		22	1337920	30284.8	300.853
	23	144185792	30279.9	300.804		23	161852096	30279.9	300.804		23	13462848	30279.9	300.804		23	98743680	30279.9	300.804		23	206415744	30279.9	300.804		23	-6262912	30279.9	300.804
	24	148939392	30274.9	300.755		24	196576832	30274.9	300.755		24	-8696704	30274.9	300.755		24	105004864	30274.9	300.755		24	186834176	30274.9	300.755		24	-7787392	30274.9	300.755
	25	132386688	30269.9	300.705		25	238126144	30269.9	300.705		25	-26902976	30269.9	300.705		25	114442112	30269.9	300.705		25	168884608	30269.9	300.705		25	-620928	30269.9	300.705
	26	88704896	30265	300.656		26	278196032	30265	300.656		26	-38481216	30265	300.656		26	125701184	30265	300.656		26	152986880	30265	300.656		26	16097664	30265	300.656
	27	20556544	30260	300.607		27	309454720	30260	300.607		27	-43139328	30260	300.607		27	137888448	30260	300.607		27	140494720	30260	300.607		27	40067392	30260	300.607
	28	-61073472	30255	300.558		28	327682432	30255	300.558		28	-42990080	30255	300.558		28	150474240	30255	300.558		28	133042432	30255	300.558		28	65765376	30255	300.558
	29	-140346752	30250.1	300.508		29	332765120	30250.1	300.508		29	-41570240	30250.1	300.508		29	162979264	30250.1	300.508		29	131319680	30250.1	300.508		29	85977536	30250.1	300.508
	30	-201880640	30245.1	300.459		30	328217408	30245.1	300.459		30	-42300928	30245.1	300.459		30	174724032	30245.1	300.459		30	134013184	30245.1	300.459		30	94356352	30245.1	300.459
	31	-235659392	30240.2	300.41		31	319490368	30240.2	300.41		31	-47083328	30240.2	300.41		31	184837568	30240.2	300.41		31	137637504	30240.2	300.41		31	87891456	30240.2	300.41
	32	-239564800	30235.2	300.36		32	311787712	30235.2	300.36		32	-55644608	30235.2	300.36		32	192521664	30235.2	300.36		32	137573376	30235.2	300.36		32	68153280	30235.2	300.36
	33	-218693632	30230.2	300.311		33	308271936	30230.2	300.311		33	-65866944	30230.2	300.311		33	197383936	30230.2	300.311		33	130015488	30230.2	300.311		33	40708992	30230.2	300.311
	34	-182096192	30225.3	300.262		34	309340224	30225.3	300.262		34	-74860224	30225.3	300.262		34	199603776	30225.3	300.262		34	114003328	30225.3	300.262		34	12942592	30225.3	300.262
	35	-138649856	30220.3	300.213		35	313165056	30220.3	300.213		35	-80215808	30220.3	300.213		35	199805952	30220.3	300.213		35	92548736	30220.3	300.213		35	-8752448	30220.3	300.213
	36	-94001152	30215.3	300.163		36	317156608	30215.3	300.163		36	-80847424	30215.3	300.163		36	198716736	30215.3	300.163		36	72176512	30215.3	300.163		36	-21170112	30215.3	300.163
	37	-49796864	30210.4	300.114		37	319618112	30210.4	300.114		37	-77100352	30210.4	300.114		37	196836224	30210.4	300.114		37	60858112	30210.4	300.114		37	-24951936	30210.4	300.114
	38	-5200704	30205.4	300.065		38	320822272	30205.4	300.065		38	-70216000	30205.4	300.065		38	194366592	30205.4	300.065		38	65036288	30205.4	300.065		38	-23537728	30205.4	300.065
	39	40448064	30200.5	300.015		39	323018560	30200.5	300.015		39	-61564608	30200.5	300.015		39	191477248	30200.5	300.015		39	86915968	30200.5	300.015		39	-21030656	30200.5	300.015
	40	85452480	30195.5	299.966		40	329373952	30195.5	299.966		40	-52127040	30195.5	299.966		40	188751040	30195.5	299.966		40	123160192	30195.5	299.966		40	-20084416	30195.5	299.966
	41	125311360	30190.5	299.917		41	342327616	30190.5	299.917		41	-42498752	30190.5	299.917		41	187487680	30190.5	299.917		41	165608064	30190.5	299.917		41	-20830592	30190.5	299.917
	42	154269504	30185.6	299.867		42	362091712	30185.6	299.867		42	-33335936	30185.6	299.867		42	189552576	30185.6	299.867		42	203822208	30185.6	299.867		42	-21292160	30185.6	299.867
	43	168035328	30180.6	299.818		43	385958400	30180.6	299.818		43	-25868800	30180.6	299.818		43	196679104	30180.6	299.818		43	228513664	30180.6	299.818		43	-18954432	30180.6	299.818
	44	166199680	30175.7	299.769		44	408717760	30175.7	299.769		44	-22046592	30175.7	299.769		44	209450560	30175.7	299.769		44	234524288	30175.7	299.769		44	-12588928	30175.7	299.769
	45	153019328	30170.7	299.72		45	424022848	30170.7	299.72		45	-24088576	30170.7	299.72		45	226437632	30170.7	299.72		45	222227200	30170.7	299.72		45	-3333824	30170.7	299.72
	46	136050240	30165.7	299.67		46	426163136	30165.7	299.67		46	-33574144	30165.7	299.67		46	243998080	30165.7	299.67		46	196859008	30165.7	299.67		46	5548416	30165.7	299.67
	47	123203904	30160.8	299.621		47	411590272	30160.8	299.621		47	-50514688	30160.8	299.621		47	257017280	30160.8	299.621		47	166149760	30160.8	299.621		47	10106560	30160.8	299.621
	48	119616064	30155.8	299.572		48	379712896	30155.8	299.572		48	-72919680	30155.8	299.572		48	260458560	30155.8	299.572		48	137301760	30155.8	299.572		48	7575488	30155.8	299.572
	49	125846592	30150.8	299.522		49	332826880	30150.8	299.522		49	-97153984	30150.8	299.522		49	251202432	30150.8	299.522		49	114590976	30150.8	299.522		49	-2284608	30150.8	299.522
	50	138316416	30145.9	299.473		50	275414912	30145.9	299.473		50	-118985792	30145.9	299.473		50	229459648	30145.9	299.473		50	98535424	30145.9	299.473		50	-17071936	30145.9	299.473
	51	151810176	30140.9	299.424		51	213233984	30140.9	299.424		51	-134859072	30140.9	299.424		51	199156544	30140.9	299.424		51	86857728	30140.9	299.424		51	-32897088	30140.9	299.424
	52	162859456	30136	299.375		52	152564544	30136	299.375		52	-142800512	30136	299.375		52	167066368	30136	299.375		52	76660352	30136	299.375		52	-46195840	30136	299.375
	53	172338048	30131	299.325		53	99748608	30131	299.325		53	-142557184	30131	299.325		53	140934016	30131	299.325		53	66710272	30131	299.325		53	-55255616	30131	299.325
	54	185896768	30126	299.276		54	60872512	30126	299.276		54	-134982272	30126	299.276		54	127223616	30126	299.276		54	58713600	30126	299.276		54	-60677248	30126	299.276
	55	211808192	30121.1	299.227		55	41303488	30121.1	299.227		55	-121095424	30121.1	299.227		55	129239040	30121.1	299.227		55	56941440	30121.1	299.227		55	-64563968	30121.1	299.227
	56	256968064	30116.1	299.177		56	44874688	30116.1	299.177		56	-101436992	30116.1	299.177		56	146203136	30116.1	299.177		56	66343552	30116.1	299.177		56	-68908928	30116.1	299.177
	57	322693120	30111.1	299.128		57	72785600	30111.1	299.128		57	-76163392	30111.1	299.128		57	173529536	30111.1	299.128		57	89998848	30111.1	299.128		57	-74084992	30111.1	299.128
	58	402168448	30106.2	299.079		58	122597440	30106.2	299.079		58	-45894784	30106.2	299.079		58	204116992	30106.2	299.079		58	127072512	30106.2	299.079		58	-78290112	30106.2	299.079
	59	480829952	30101.2	299.029		59	187864000	30101.2	299.029		59	-12828096	30101.2	299.029		59	230217408	30101.2	299.029		59	172251392	30101.2	299.029		59	-78301248	30101.2	299.029
	60	539848192	30096.3	298.98		60	258826368	30096.3	298.98		60	18634752	30096.3	298.98		60	245332736	30096.3	298.98		60	216992000	30096.3	298.98		60	-71184512	30096.3	298.98
	61	561660736	30091.3	298.931		61	324219904	30091.3	298.931		61	42362624	30091.3	298.931		61	245674048	30091.3	298.931		61	252126464	30091.3	298.931		61	-56078464	30091.3	298.931
	62	535661312	30086.3	298.882		62	373762880	30086.3	298.882		62	52195008	30086.3	298.882		62	230898624	30086.3	298.882		62	270781696	30086.3	298.882		62	-35083264	30086.3	298.882
	63	462032640	30081.4	298.832		63	400535232	30081.4	298.832		63	44334784	30081.4	298.832		63	204029952	30081.4	298.832		63	270450688	30081.4	298.832		63	-12716352	30081.4	298.832
	64	352332480	30076.4	298.783		64	402418496	30076.4	298.783		64	19440576	30076.4	298.783		64	170631040	30076.4	298.783		64	253433728	30076.4	298.783		64	5882432	30076.4	298.783
	65	226584384	30071.4	298.734		65	382090048	30071.4	298.734		65	-16613056	30071.4	298.734		65	137415424	30071.4	298.734		65	225580544	30071.4	298.734		65	17152960	30071.4	298.734
	66	107837952	30066.5	298.684		66	345636096	30066.5	298.684		66	-53873664	30066.5	298.684		66	110585920	30066.5	298.684		66	193987840	30066.5	298.684		66	20637312	30066.5	298.684
	67	16021056	30061.5	298.635		67	300398144	30061.5	298.635		67	-81143552	30061.5	298.635		67	94270848	30061.5	298.635		67	164689920	30061.5	298.635		67	19032256	30061.5	298.635
	68	-36910592	30056.6	298.586		68	252956544	30056.6	298.586		68	-89549760	30056.6	298.586		68	89460288	30056.6	298.586		68	141283200	30056.6	298.586		68	16699008	30056.6	298.586
	69	-49047232	30051.6	298.536		69	208025024	30051.6	298.536		69	-75524800	30051.6	298.536		69	93781632	30051.6	298.536		69	124907904	30051.6	298.536		69	17333760	30051.6	298.536
	70	-27387264	30046.6	298.487		70	168553024	30046.6	298.487		70	-42042624	30046.6	298.487		70	102257984	30046.6	298.487		70	115314816	30046.6	298.487		70	21952384	30046.6	298.487
	71	15799744	30041.7	298.438		71	136720256	30041.7	298.438		71	2375104	30041.7	298.438		71	108891584	30041.7	298.438		71	112233856	30041.7	298.438		71	28224640	30041.7	298.438
	72	67546176	30036.7	298.389		72	115075968	30036.7	298.389		72	46500288	30036.7	298.389		72	108611264	30036.7	298.389		72	116176512	30036.7	298.389		72	31558464	30036.7	298.389
	73	117916160	30031.7	298.339		73	107015040	30031.7	298.339		73	80005376	30031.7	298.339		73	98942016	30031.7	298.339		73	128160128	30031.7	298.339		73	27470016	30031.7	298.339
	74	161587392	30026.8	298.29		74	116155520	30026.8	298.29		74	96519040	30026.8	298.29		74	80805248	30026.8	298.29		74	148491008	30026.8	298.29		74	14117376	30026.8	298.29
	75	196963200	30021.8	298.241		75	144782080	30021.8	298.241		75	95106240	30021.8	298.241		75	58149376	30021.8	298.241		75	175319424	30021.8	298.241		75	-6257216	30021.8	298.241
	76	223591872	30016.9	298.191		76	192072512	30016.9	298.191		76	79827328	30016.9	298.191		76	36548480	30016.9	298.191		76	203902208	30016.9	298.191		76	-27748032	30016.9	298.191
	77	239419840	30011.9	298.142		77	253030144	30011.9	298.142		77	57772544	30011.9	298.142		77	21300800	30011.9	298.142		77	227227648	30011.9	298.142		77	-42975872	30011.9	298.142
	78	239489536	30006.9	298.093		78	318808064	30006.9	298.093		78	36459648	30006.9	298.093		78	15747520	30006.9	298.093		78	238016384	30006.9	298.093		78	-46096832	30006.9	298.093
	79	217027584	30002	298.044		79	378516928	30002	298.044		79	21567488	30002	298.044		79	20415360	30002	298.044		79	231378048	30002	298.044		79	-35268352	30002	298.044
	80	166722048	29997	297.994		80	421945216	29997	297.994		80	15662720	29997	297.994		80	33226944	29997	297.994		80	206980480	29997	297.994		80	-13425984	29997	297.994
	81	88816000	29992	297.945		81	442203008	29992	297.945		81	18082880	29992	297.945		81	50573888	29992	297.945		81	169686656	29992	297.945		81	13004288	29992	297.945
	82	-7990592	29987.1	297.896		82	437316224	29987.1	297.896		82	25694784	29987.1	297.896		82	68726208	29987.1	297.896		82	128222720	29987.1	297.896		82	36887232	29987.1	297.896
	83	-106619456	29982.1	297.846		83	410249600	29982.1	297.846		83	34046784	29982.1	297.846		83	84984064	29982.1	297.846		83	92302592	29982.1	297.846		83	53385920	29982.1	297.846
	84	-185363968	29977.2	297.797		84	367493952	29977.2	297.797		84	38494976	29977.2	297.797		84	98185856	29977.2	297.797		84	69353088	29977.2	297.797		84	61831296	29977.2	297.797
	85	-224443008	29972.2	297.748		85	316907456	29972.2	297.748		85	35102080	29972.2	297.748		85	108537664	29972.2	297.748		85	62203776	29972.2	297.748		85	65623168	29972.2	297.748
	86	-213100736	29967.2	297.698		86	265704256	29967.2	297.698		86	21314752	29967.2	297.698		86	117039232	29967.2	297.698		86	68716160	29967.2	297.698		86	70255424	29967.2	297.698
	87	-154426368	29962.3	297.649		87	219268608	29962.3	297.649		87	-3507968	29962.3	297.649		87	124901376	29962.3	297.649		87	83477888	29962.3	297.649		87	80427712	29962.3	297.649
	88	-65659136	29957.3	297.6		88	180971328	29957.3	297.6		88	-37728896	29957.3	297.6		88	133234688	29957.3	297.6		88	100760192	29957.3	297.6		88	97620416	29957.3	297.6
	89	26641984	29952.4	297.551		89	152666240	29952.4	297.551		89	-77385344	29952.4	297.551		89	143039424	29952.4	297.551		89	117366016	29952.4	297.551		89	119271168	29952.4	297.551
	90	95142016	29947.4	297.501		90	135287040	29947.4	297.501		90	-116673600	29947.4	297.501		90	155292160	29947.4	297.501		90	134039296	29947.4	297.501		90	139919872	29947.4	297.501
	91	120944256	29942.4	297.452		91	129067584	29942.4	297.452		91	-149065856	29942.4	297.452		91	170863360	29942.4	297.452		91	154762752	29942.4	297.452		91	153748928	29942.4	297.452
	92	99954304	29937.5	297.403		92	133285760	29937.5	297.403		92	-168894656	29937.5	297.403		92	190132672	29937.5	297.403		92	184245504	29937.5	297.403		92	157289920	29937.5	297.403
	93	43835776	29932.5	297.353		93	145835840	29932.5	297.353		93	-172950976	29932.5	297.353		93	212425408	29932.5	297.353		93	224756864	29932.5	297.353		93	150993536	29932.5	297.353
	94	-24927040	29927.5	297.304		94	163133056	29927.5	297.304		94	-161503808	29927.5	297.304		94	235597056	29927.5	297.304		94	273793792	29927.5	297.304		94	138911808	29927.5	297.304
	95	-81966912	29922.6	297.255		95	180713024	29922.6	297.255		95	-138271488	29922.6	297.255		95	256117504	29922.6	297.255		95	323740800	29922.6	297.255		95	126645440	29922.6	297.255
	96	-110410432	29917.6	297.206		96	194485504	29917.6	297.206		96	-109247808	29917.6	297.206		96	269802624	29917.6	297.206		96	363824896	29917.6	297.206		96	118543808	29917.6	297.206
	97	-106894400	29912.7	297.156		97	202160064	29912.7	297.156		97	-80749696	29912.7	297.156		97	273013440	29912.7	297.156		97	383668096	29912.7	297.156		97	115509696	29912.7	297.156
	98	-81793664	29907.7	297.107		98	204145792	29907.7	297.107		98	-57408512	29907.7	297.107		98	263867072	29907.7	297.107		98	377037952	29907.7	297.107		98	114485760	29907.7	297.107
	99	-53647488	29902.7	297.058		99	203386560	29902.7	297.058		99	-40882496	29902.7	297.058		99	242936960	29902.7	297.058		99	344296704	29902.7	297.058		99	109911296	29902.7	297.058
	100	-40241280	29897.8	297.008		100	204069376	29897.8	297.008		100	-29785152	29897.8	297.008		100	213122816	29897.8	297.008		100	292587136	29897.8	297.008		100	96507136	29897.8	297.008
	101	-50243584	29892.8	296.959		101	209713408	29892.8	296.959		101	-20822464	29892.8	296.959		101	178740096	29892.8	296.959		101	233696384	29892.8	296.959		101	72104064	29892.8	296.959
	102	-79070976	29887.8	296.91		102	221501632	29887.8	296.91		102	-10623360	29887.8	296.91		102	144233920	29887.8	296.91		102	180461184	29887.8	296.91		102	39187520	29887.8	296.91
	103	-110828672	29882.9	296.86		103	237656000	29882.9	296.86		103	2527296	29882.9	296.86		103	113069120	29882.9	296.86		103	143073536	29882.9	296.86		103	4394752	29882.9	296.86
	104	-125511616	29877.9	296.811		104	254187968	29877.9	296.811		104	17773696	29877.9	296.811		104	87211584	29877.9	296.811		104	126594816	29877.9	296.811		104	-23870400	29877.9	296.811
	105	-108319936	29873	296.762		105	266694912	29873	296.762		105	31931136	29873	296.762		105	67273408	29873	296.762		105	130404096	29873	296.762		105	-38690752	29873	296.762
	106	-56957696	29868	296.713		106	272347264	29868	296.713		106	40717696	29868	296.713		106	53041856	29868	296.713		106	149507968	29868	296.713		106	-37345344	29868	296.713
	107	16388096	29863	296.663		107	271100160	29863	296.663		107	40402752	29863	296.663		107	43943616	29863	296.663		107	176959616	29863	296.663		107	-22310656	29863	296.663
	108	89403904	29858.1	296.614		108	265533120	29858.1	296.614		108	29176896	29858.1	296.614		108	39114944	29858.1	296.614		108	206329088	29858.1	296.614		108	-147904	29858.1	296.614
	109	138587392	29853.1	296.565		109	259391424	29853.1	296.565		109	7731072	29853.1	296.565		109	37079936	29853.1	296.565		109	233326464	29853.1	296.565		109	21194752	29853.1	296.565
	110	148984768	29848.1	296.515		110	255556864	29848.1	296.515		110	-21074752	29848.1	296.515		110	35381120	29848.1	296.515		110	256156672	29848.1	296.515		110	35464320	29848.1	296.515
	111	120552512	29843.2	296.466		111	254469504	29843.2	296.466		111	-53187712	29843.2	296.466		111	30644544	29843.2	296.466		111	274766208	29843.2	296.466		111	40246528	29843.2	296.466
	112	68391808	29838.2	296.417		112	253805760	29838.2	296.417		112	-84493248	29838.2	296.417		112	19379776	29838.2	296.417		112	289536896	29838.2	296.417		112	37322944	29838.2	296.417
	113	16732352	29833.3	296.367		113	249604416	29833.3	296.367		113	-111655552	29833.3	296.367		113	-612928	29833.3	296.367		113	300117504	29833.3	296.367		113	31230208	29833.3	296.367
	114	-10778816	29828.3	296.318		114	238308544	29828.3	296.318		114	-132453248	29828.3	296.318		114	-28799424	29828.3	296.318		114	304896896	29828.3	296.318		114	26807936	29828.3	296.318
	115	-367296	29823.3	296.269		115	218736640	29823.3	296.269		115	-145695296	29823.3	296.269		115	-61200320	29823.3	296.269		115	301290368	29823.3	296.269		115	26928640	29823.3	296.269
	116	46876992	29818.4	296.22		116	193021184	29818.4	296.22		116	-150984768	29818.4	296.22		116	-90976768	29818.4	296.22		116	286666112	29818.4	296.22		116	31434432	29818.4	296.22
	117	116275328	29813.4	296.17		117	166063680	29813.4	296.17		117	-148600512	29813.4	296.17		117	-110328512	29813.4	296.17		117	259517056	29813.4	296.17		117	37664832	29813.4	296.17
	118	186327232	29808.4	296.121		118	143767552	29808.4	296.121		118	-139596032	29808.4	296.121		118	-113079168	29808.4	296.121		118	220430336	29808.4	296.121		118	42178304	29808.4	296.121
	119	237858176	29803.5	296.072		119	130891712	29803.5	296.072		119	-125989952	29803.5	296.072		119	-96917056	29803.5	296.072		119	172514304	29803.5	296.072		119	42704256	29803.5	296.072
	120	261505984	29798.5	296.022		120	129516480	29798.5	296.022		120	-110786368	29798.5	296.022		120	-64320000	29798.5	296.022		120	121118976	29798.5	296.022		120	39304000	29798.5	296.022
	121	260381312	29793.6	295.973		121	138767808	29793.6	295.973		121	-97596224	29793.6	295.973		121	-21726528	29793.6	295.973		121	72899712	29793.6	295.973		121	34159680	29793.6	295.973
	122	246987584	29788.6	295.924		122	155799360	29788.6	295.924		122	-89825152	29788.6	295.924		122	22715968	29788.6	295.924		122	34455168	29788.6	295.924		122	30144448	29788.6	295.924
	123	236089344	29783.6	295.875		123	177417152	29783.6	295.875		123	-89643712	29783.6	295.875		123	61863552	29783.6	295.875		123	10901120	29783.6	295.875		123	28968896	29783.6	295.875
	124	236987456	29778.7	295.825		124	201459904	29778.7	295.825		124	-97133760	29778.7	295.825		124	91596544	29778.7	295.825		124	4790144	29778.7	295.825		124	29941568	29778.7	295.825
	125	248833792	29773.7	295.776		125	227249280	29773.7	295.776		125	-109998080	29773.7	295.776		125	111357248	29773.7	295.776		125	15722496	29773.7	295.776		125	30085120	29773.7	295.776
	126	261124800	29768.7	295.727		126	254981056	29768.7	295.727		126	-124033728	29768.7	295.727		126	123137856	29768.7	295.727		126	40803968	29768.7	295.727		126	25668288	29768.7	295.727
	127	259080192	29763.8	295.677		127	284524928	29763.8	295.677		127	-134272640	29763.8	295.677		127	129580480	29763.8	295.677		127	75817856	29763.8	295.677		127	14461824	29763.8	295.677
	128	231337280	29758.8	295.628		128	314427840	29758.8	295.628		128	-136425856	29758.8	295.628		128	132221376	29758.8	295.628		128	116690944	29758.8	295.628		128	-2406336	29758.8	295.628
	129	176324672	29753.9	295.579		129	341796800	29753.9	295.579		129	-128150912	29753.9	295.579		129	130748352	29753.9	295.579		129	160656896	29753.9	295.579		129	-20020992	29753.9	295.579
	130	104287808	29748.9	295.529		130	363230464	29748.9	295.529		130	-109732736	29748.9	295.529		130	123548416	29748.9	295.529		130	206579584	29748.9	295.529		130	-31083328	29748.9	295.529
	131	33925248	29743.9	295.48		131	376360192	29743.9	295.48		131	-83995456	29743.9	295.48		131	109122304	29743.9	295.48		131	254234368	29743.9	295.48		131	-28704320	29743.9	295.48
	132	-14945856	29739	295.431		132	381173248	29739	295.431		132	-55535616	29739	295.431		132	87515456	29739	295.431		132	302817920	29739	295.431		132	-9450624	29739	295.431
	133	-29476224	29734	295.382		133	380341056	29734	295.382		133	-29572224	29734	295.382		133	60966848	29734	295.382		133	349420288	29734	295.382		133	24695872	29734	295.382
	134	-9065472	29729.1	295.332		134	378255872	29729.1	295.332		134	-10778688	29729.1	295.332		134	33467136	29729.1	295.332		134	388350208	29729.1	295.332		134	66403200	29729.1	295.332
	135	34454272	29724.1	295.283		135	379143360	29724.1	295.283		135	-2395648	29724.1	295.283		135	9545792	29724.1	295.283		135	411958656	29724.1	295.283		135	105176256	29724.1	295.283
	136	81757696	29719.1	295.234		136	385123264	29719.1	295.234		136	-5771328	29719.1	295.234		136	-6988544	29719.1	295.234		136	412973440	29719.1	295.234		136	130859968	29719.1	295.234
	137	113861888	29714.2	295.184		137	395173632	29714.2	295.184		137	-20329728	29714.2	295.184		137	-13680192	29714.2	295.184		137	387595008	29714.2	295.184		137	137078848	29714.2	295.184
	138	119435456	29709.2	295.135		138	405551040	29709.2	295.135		138	-43866560	29709.2	295.135		138	-9225600	29709.2	295.135		138	338055040	29709.2	295.135		138	123257152	29709.2	295.135
	139	98503296	29704.2	295.086		139	411522624	29704.2	295.086		139	-73047168	29704.2	295.086		139	7166016	29704.2	295.086		139	273327232	29704.2	295.086		139	94459776	29704.2	295.086
	140	61185280	29699.3	295.037		140	409624384	29699.3	295.037		140	-103994880	29699.3	295.037		140	36115392	29699.3	295.037		140	207284352	29699.3	295.037		140	59204224	29699.3	295.037
	141	22362176	29694.3	294.987		141	399380928	29694.3	294.987		141	-132882496	29694.3	294.987		141	77538240	29694.3	294.987		141	154634112	29694.3	294.987		141	26214720	29694.3	294.987
	142	-5077952	29689.4	294.938		142	383655744	29689.4	294.938		142	-156450688	29689.4	294.938		142	129269056	29689.4	294.938		142	126002048	29689.4	294.938		142	1461120	29689.4	294.938
	143	-15276800	29684.4	294.889		143	367435968	29684.4	294.889		143	-172375040	29684.4	294.889		143	185607104	29684.4	294.889		143	124084864	29684.4	294.889		143	-13376000	29684.4	294.889
	144	-10578944	29679.4	294.839		144	355588864	29679.4	294.839		144	-179423296	29679.4	294.839		144	236946240	29679.4	294.839		144	142548352	29679.4	294.839		144	-20550912	29679.4	294.839
	145	1372480	29674.5	294.79		145	350605312	29674.5	294.79		145	-177387648	29674.5	294.79		145	271379328	29674.5	294.79		145	168325632	29674.5	294.79		145	-24363136	29674.5	294.79
	146	12868160	29669.5	294.741		146	351357248	29669.5	294.741		146	-166855808	29669.5	294.741		146	278270400	29669.5	294.741		146	186584192	29669.5	294.741		146	-28695616	29669.5	294.741
	147	20889728	29664.5	294.691		147	353435072	29664.5	294.691		147	-148944192	29664.5	294.691		147	252653312	29664.5	294.691		147	186444672	29664.5	294.691		147	-35085504	29664.5	294.691
	148	28915264	29659.6	294.642		148	350923456	29659.6	294.642		148	-125130752	29659.6	294.642		148	198541888	29659.6	294.642		148	165131648	29659.6	294.642		148	-42096128	29659.6	294.642
	149	44825344	29654.6	294.593		149	338851072	29654.6	294.593		149	-97260288	29654.6	294.593		149	129320768	29654.6	294.593		149	128814464	29654.6	294.593		149	-46124480	29654.6	294.593
	150	75937984	29649.7	294.544		150	315281472	29649.7	294.544		150	-67679808	29649.7	294.544		150	64419264	29649.7	294.544		150	89773440	29649.7	294.544		150	-43158144	29649.7	294.544
	151	123682688	29644.7	294.494		151	282193792	29644.7	294.494		151	-39346240	29644.7	294.494		151	23080448	29644.7	294.494		151	61087616	29644.7	294.494		151	-30648896	29644.7	294.494
	152	180679936	29639.7	294.445		152	244835904	29639.7	294.445		152	-15711616	29639.7	294.445		152	17485056	29639.7	294.445		152	51132288	29639.7	294.445		152	-8719488	29639.7	294.445
	153	231926208	29634.8	294.396		153	209856192	29634.8	294.396		153	-262528	29634.8	294.396		153	48049728	29634.8	294.396		153	60255360	29634.8	294.396		153	19710592	29634.8	294.396
	154	259871744	29629.8	294.346		154	182973696	29629.8	294.346		154	4244992	29629.8	294.346		154	103032192	29629.8	294.346		154	81045504	29629.8	294.346		154	49813312	29629.8	294.346
	155	251329408	29624.8	294.297		155	167066112	29624.8	294.297		155	-3372672	29624.8	294.297		155	162849792	29624.8	294.297		155	102005120	29624.8	294.297		155	76315200	29624.8	294.297
	156	203231680	29619.9	294.248		156	161335808	29619.9	294.248		156	-22134336	29619.9	294.248		156	207497792	29619.9	294.248		156	112923392	29619.9	294.248		156	94968448	29619.9	294.248
	157	124680576	29614.9	294.199		157	161779776	29614.9	294.199		157	-48839680	29614.9	294.199		157	224049536	29614.9	294.199		157	109498240	29614.9	294.199		157	103586240	29614.9	294.199
	158	34319232	29610	294.149		158	162736320	29610	294.149		158	-78649280	29610	294.149		158	211120128	29610	294.149		158	95115136	29610	294.149		158	102447168	29610	294.149
	159	-45940544	29605	294.1		159	158960448	29605	294.1		159	-106148672	29605	294.1		159	178459968	29605	294.1		159	79005824	29605	294.1		159	94101376	29605	294.1
	160	-98269440	29600	294.051		160	147558400	29600	294.051		160	-126545408	29600	294.051		160	141970176	29600	294.051		160	71670784	29600	294.051		160	82729152	29600	294.051
	161	-114411520	29595.1	294.001		161	129190784	29595.1	294.001		161	-136609664	29595.1	294.001		161	116426688	29595.1	294.001		161	79702400	29595.1	294.001		161	73202048	29595.1	294.001
	162	-97272320	29590.1	293.952		162	108170880	29590.1	293.952		162	-135100608	29590.1	293.952		162	109161536	29590.1	293.952		162	102413440	29590.1	293.952		162	69963840	29590.1	293.952
	163	-58294784	29585.1	293.903		163	91370688	29585.1	293.903		163	-122665344	29585.1	293.903		163	117430400	29585.1	293.903		163	131838720	29585.1	293.903		163	75859456	29585.1	293.903
	164	-12065216	29580.2	293.853		164	86169088	29580.2	293.853		164	-101419328	29580.2	293.853		164	130457920	29580.2	293.853		164	156133632	29580.2	293.853		164	91133632	29580.2	293.853
	165	29393792	29575.2	293.804		165	97971904	29575.2	293.804		165	-74498624	29575.2	293.804		165	135010048	29575.2	293.804		165	164845824	29575.2	293.804		165	112922688	29575.2	293.804
	166	60313600	29570.3	293.755		166	128037952	29570.3	293.755		166	-45772992	29570.3	293.755		166	121793728	29570.3	293.755		166	153689600	29570.3	293.755		166	135575360	29570.3	293.755
	167	81634880	29565.3	293.706		167	172374784	29565.3	293.706		167	-19683520	29565.3	293.706		167	89733504	29565.3	293.706		167	126704512	29565.3	293.706		167	151952896	29565.3	293.706
	168	98541952	29560.3	293.656		168	222252928	29560.3	293.656		168	-964160	29560.3	293.656		168	46287552	29560.3	293.656		168	94856576	29560.3	293.656		168	155509440	29560.3	293.656
	169	116604160	29555.4	293.607		169	266413184	29555.4	293.607		169	6032384	29555.4	293.607		169	3876992	29555.4	293.607		169	71738496	29555.4	293.607		169	142551488	29555.4	293.607
	170	138451904	29550.4	293.558		170	294435840	29550.4	293.558		170	-1505280	29550.4	293.558		170	-25717504	29550.4	293.558		170	68275712	29550.4	293.558		170	113840768	29550.4	293.558
	171	162402624	29545.5	293.508		171	300210752	29545.5	293.508		171	-23455488	29545.5	293.508		171	-36318208	29545.5	293.508		171	88710400	29545.5	293.508		171	74798272	29545.5	293.508
	172	183363840	29540.5	293.459		172	284239808	29540.5	293.459		172	-55722688	29540.5	293.459		172	-29476224	29540.5	293.459		172	129479808	29540.5	293.459		172	34028608	29540.5	293.459
	173	195263872	29535.5	293.41		173	253777536	29535.5	293.41		173	-90228736	29535.5	293.41		173	-13039232	29535.5	293.41		173	181268992	29535.5	293.41		173	553664	29535.5	293.41
	174	193674176	29530.6	293.36		174	220546624	29530.6	293.36		174	-116368448	29530.6	293.36		174	2851968	29530.6	293.36		174	233116800	29530.6	293.36		174	-19254080	29530.6	293.36
	175	177429184	29525.6	293.311		175	196699072	29525.6	293.311		175	-123811712	29525.6	293.311		175	10241920	29525.6	293.311		175	276641792	29525.6	293.311		175	-23823168	29525.6	293.311
	176	148713536	29520.6	293.262		176	190461760	29520.6	293.262		176	-105893120	29520.6	293.262		176	6203008	29520.6	293.262		176	308560512	29520.6	293.262		176	-16695424	29520.6	293.262
	177	111903168	29515.7	293.213		177	203137920	29515.7	293.213		177	-62400960	29515.7	293.213		177	-7060480	29515.7	293.213		177	330588800	29515.7	293.213		177	-4808192	29515.7	293.213
	178	71958720	29510.7	293.163		178	228686208	29510.7	293.163		178	-598592	29510.7	293.163		178	-24490944	29510.7	293.163		178	347085952	29510.7	293.163		178	4571584	29510.7	293.163
	179	33184384	29505.8	293.114		179	256106240	29505.8	293.114		179	66152576	29505.8	293.114		179	-41338048	29505.8	293.114		179	361819648	29505.8	293.114		179	6962048	29505.8	293.114
	180	-1252608	29500.8	293.065		180	273716800	29500.8	293.065		180	121928768	29500.8	293.065		180	-55425600	29500.8	293.065		180	375528320	29500.8	293.065		180	2474112	29500.8	293.065
	181	-29182784	29495.8	293.015		181	273619008	29495.8	293.015		181	152830912	29495.8	293.015		181	-67413952	29495.8	293.015		181	385445760	29495.8	293.015		181	-4490944	29495.8	293.015
	182	-49151552	29490.9	292.966		182	254559424	29490.9	292.966		182	151041024	29490.9	292.966		182	-79162048	29490.9	292.966		182	386923648	29490.9	292.966		182	-7510912	29490.9	292.966
	183	-60418368	29485.9	292.917		183	222094144	29485.9	292.917		183	116906176	29485.9	292.917		183	-91356480	29485.9	292.917		183	376235008	29485.9	292.917		183	-1334400	29485.9	292.917
	184	-63306944	29480.9	292.868		184	186111296	29480.9	292.868		184	58337024	29480.9	292.868		184	-101948544	29480.9	292.868		184	353084160	29480.9	292.868		184	15490944	29480.9	292.868
	185	-59581056	29476	292.818		185	156889088	29476	292.818		185	-12165440	29476	292.818		185	-106435072	29476	292.818		185	321524096	29476	292.818		185	39796160	29476	292.818
	186	-52354944	29471	292.769		186	141430208	29471	292.769		186	-81645952	29471	292.769		186	-99940736	29471	292.769		186	288770688	29471	292.769		186	65183232	29471	292.769
	187	-45260864	29466.1	292.72		187	141585792	29466.1	292.72		187	-140401920	29466.1	292.72		187	-80010752	29466.1	292.72		187	262422144	29466.1	292.72		187	84994880	29466.1	292.72
	188	-41058176	29461.1	292.67		188	154575360	29461.1	292.67		188	-183953984	29461.1	292.67		188	-48566080	29461.1	292.67		188	247355520	29461.1	292.67		188	95457856	29461.1	292.67
	189	-40311360	29456.1	292.621		189	175367872	29456.1	292.621		189	-212780864	29456.1	292.621		189	-11864320	29456.1	292.621		189	243722112	29456.1	292.621		189	97478528	29456.1	292.621
	190	-40882624	29451.2	292.572		190	199561088	29451.2	292.572		190	-230285568	29451.2	292.572		190	21676800	29451.2	292.572		190	246955904	29451.2	292.572		190	96175296	29451.2	292.572
	191	-38668032	29446.2	292.522		191	225259264	29446.2	292.522		191	-240149952	29446.2	292.522		191	44818624	29446.2	292.522		191	249802496	29446.2	292.522		191	98289600	29446.2	292.522
	192	-29384000	29441.2	292.473		192	253066752	29441.2	292.473		192	-244352320	29441.2	292.473		192	54416320	29441.2	292.473		192	245471872	29441.2	292.473		192	108643648	29441.2	292.473
	193	-10620288	29436.3	292.424		193	284339264	29436.3	292.424		193	-242654848	29436.3	292.424		193	52509120	29436.3	292.424		193	230542080	29436.3	292.424		193	127311744	29436.3	292.424
	194	16840960	29431.3	292.375		194	318770816	29431.3	292.375		194	-233565504	29431.3	292.375		194	45090240	29431.3	292.375		194	206376448	29431.3	292.375		194	148906752	29431.3	292.375
	195	49131136	29426.4	292.325		195	352754048	29426.4	292.325		195	-216039168	29426.4	292.325		195	39192320	29426.4	292.325		195	178482688	29426.4	292.325		195	164447104	29426.4	292.325
	196	80799104	29421.4	292.276		196	379561920	29421.4	292.276		196	-190871296	29421.4	292.276		196	39719936	29421.4	292.276		196	154127616	29421.4	292.276		196	165093760	29421.4	292.276
	197	106957376	29416.4	292.227		197	391469312	29416.4	292.227		197	-160969920	29416.4	292.227		197	47519104	29416.4	292.227		197	139249280	29416.4	292.227		197	146156160	29416.4	292.227
	198	124954880	29411.5	292.177		198	382904576	29411.5	292.177		198	-130344064	29411.5	292.177		198	59498432	29411.5	292.177		198	135956096	29411.5	292.177		198	109586240	29411.5	292.177
	199	134714688	29406.5	292.128		199	353139584	29406.5	292.128		199	-102354688	29406.5	292.128		199	70575232	29406.5	292.128		199	141617024	29406.5	292.128		199	63792320	29406.5	292.128
	200	137619840	29401.5	292.079		200	307160064	29401.5	292.079		200	-78186688	29401.5	292.079		200	76353664	29401.5	292.079		200	149861760	29401.5	292.079		200	20747712	29401.5	292.079
	201	134677376	29396.6	292.03		201	254163584	29396.6	292.03		201	-56391232	29396.6	292.03		201	75181056	29396.6	292.03		201	153029760	29396.6	292.03		201	-8466816	29396.6	292.03
	202	125150656	29391.6	291.98		202	204218240	29391.6	291.98		202	-33791360	29391.6	291.98		202	68655424	29391.6	291.98		202	145057920	29391.6	291.98		202	-17876288	29391.6	291.98
	203	106642688	29386.7	291.931		203	164461504	29386.7	291.931		203	-7319104	29386.7	291.931		203	60517248	29386.7	291.931		203	123680256	29386.7	291.931		203	-8875264	29386.7	291.931
	204	76778816	29381.7	291.882		204	136439424	29381.7	291.882		204	24154688	29381.7	291.882		204	54669248	29381.7	291.882		204	91144960	29381.7	291.882		204	10335360	29381.7	291.882
	205	41986048	29376.7	291.832		205	145325248	29376.7	291.832		205	49464384	29376.7	291.832		205	53367552	29376.7	291.832		205	67114624	29376.7	291.832		205	35984064	29376.7	291.832
	206	618560	29371.8	291.783		206	155201024	29371.8	291.783		206	74015616	29371.8	291.783		206	57736320	29371.8	291.783		206	45376000	29371.8	291.783		206	48731392	29371.8	291.783
	207	-39635072	29366.8	291.734		207	156830464	29366.8	291.734		207	93234688	29366.8	291.734		207	64841152	29366.8	291.734		207	32229632	29366.8	291.734		207	42065856	29366.8	291.734
	208	-69601856	29361.8	291.684		208	143825728	29361.8	291.684		208	104412160	29361.8	291.684		208	72438336	29361.8	291.684		208	30982400	29361.8	291.684		208	15575744	29361.8	291.684
	209	-83070976	29356.9	291.635		209	114834112	29356.9	291.635		209	107724416	29356.9	291.635		209	78935872	29356.9	291.635		209	41396864	29356.9	291.635		209	-25229568	29356.9	291.635
	210	-80304896	29351.9	291.586		210	73838848	29351.9	291.586		210	106002240	29351.9	291.586		210	83804096	29351.9	291.586		210	60339712	29351.9	291.586		210	-71389632	29351.9	291.586
	211	-68977408	29347	291.537		211	28659200	29347	291.537		211	103057792	29347	291.537		211	87170048	29347	291.537		211	83294976	29347	291.537		211	-113759232	29347	291.537
	212	-61564928	29342	291.487		212	-11556736	29342	291.487		212	101384256	29342	291.487		212	89070208	29342	291.487		212	105996800	29342	291.487		212	-145738688	29342	291.487
	213	-69908864	29337	291.438		213	-38846528	29337	291.438		213	100417152	29337	291.438		213	89043648	29337	291.438		213	125474560	29337	291.438		213	-164545152	29337	291.438
	214	-99206336	29332.1	291.389		214	-48183936	29332.1	291.389		214	96326528	29332.1	291.389		214	86478976	29332.1	291.389		214	140126336	29332.1	291.389		214	-170850752	29332.1	291.389
	215	-144276544	29327.1	291.339		215	-38182144	29327.1	291.339		215	83582592	29327.1	291.339		215	81555072	29327.1	291.339		215	148930176	29327.1	291.339		215	-167314304	29327.1	291.339
	216	-190180800	29322.2	291.29		216	-10904896	29322.2	291.29		216	57653184	29322.2	291.29		216	76099072	29322.2	291.29		216	150340352	29322.2	291.29		216	-156903552	29322.2	291.29
	217	-217409280	29317.2	291.241		217	28852096	29317.2	291.241		217	17581120	29317.2	291.241		217	73579712	29317.2	291.241		217	141602688	29317.2	291.241		217	-141809152	29317.2	291.241
	218	-209708352	29312.2	291.191		218	74507776	29312.2	291.191		218	-32823616	29312.2	291.191		218	77869312	29312.2	291.191		218	119060864	29312.2	291.191		218	-123303744	29312.2	291.191
	219	-161235136	29307.3	291.142		219	118759104	29307.3	291.142		219	-85838528	29307.3	291.142		219	91157376	29307.3	291.142		219	79569280	29307.3	291.142		219	-102357184	29307.3	291.142
	220	-79811264	29302.3	291.093		220	154774528	29302.3	291.093		220	-132445376	29302.3	291.093		220	112046144	29302.3	291.093		220	22550528	29302.3	291.093		220	-80450496	29302.3	291.093
	221	15353280	29297.3	291.044		221	177474816	29297.3	291.044		221	-165583168	29297.3	291.044		221	135008768	29297.3	291.044		221	-48199808	29297.3	291.044		221	-59998848	29297.3	291.044
	222	100667840	29292.4	290.994		222	184664448	29292.4	290.994		222	-182590272	29292.4	290.994		222	151869376	29292.4	290.994		222	-123934720	29292.4	290.994		222	-44079040	29292.4	290.994
	223	156962816	29287.4	290.945		223	177600896	29287.4	290.945		223	-185744448	29287.4	290.945		223	154979712	29287.4	290.945		223	-192214784	29287.4	290.945		223	-35575296	29287.4	290.945
	224	176312640	29282.5	290.896		224	160619776	29282.5	290.896		224	-180687872	29282.5	290.896		224	140808448	29282.5	290.896		224	-239921280	29282.5	290.896		224	-36195008	29282.5	290.896
	225	163988928	29277.5	290.846		225	139733184	29277.5	290.846		225	-173497664	29277.5	290.846		225	112246848	29277.5	290.846		225	-257161216	29277.5	290.846		225	-45877504	29277.5	290.846
	226	134863616	29272.5	290.797		226	120586752	29272.5	290.797		226	-167782784	29272.5	290.797		226	78351296	29272.5	290.797		226	-240701952	29272.5	290.797		226	-62913280	29272.5	290.797
	227	106080256	29267.6	290.748		227	106549312	29267.6	290.748		227	-163149184	29267.6	290.748		227	51349312	29267.6	290.748		227	-195567104	29267.6	290.748		227	-84715328	29267.6	290.748
	228	89439872	29262.6	290.699		228	97773760	29262.6	290.699		228	-155708608	29262.6	290.699		228	42025536	29262.6	290.699		228	-134001152	29262.6	290.699		228	-108842624	29262.6	290.699
	229	86933376	29257.6	290.649		229	91712640	29257.6	290.649		229	-140339328	29257.6	290.649		229	55435392	29257.6	290.649		229	-71960448	29257.6	290.649		229	-133744064	29257.6	290.649
	230	91247808	29252.7	290.6		230	84911744	29252.7	290.6		230	-113593152	29252.7	290.6		230	88834944	29252.7	290.6		230	-24258176	29252.7	290.6		230	-158837120	29252.7	290.6
	231	90667392	29247.7	290.551		231	75261824	29247.7	290.551		231	-75875328	29247.7	290.551		231	132744768	29247.7	290.551		231	-68096	29247.7	290.551		231	-183884800	29247.7	290.551
	232	75755904	29242.8	290.501		232	63592384	29242.8	290.501		232	-31901056	29242.8	290.501		232	174642496	29242.8	290.501		232	-418944	29242.8	290.501		232	-208019584	29242.8	290.501
	233	44504768	29237.8	290.452		233	53736320	29237.8	290.452		233	10739776	29237.8	290.452		233	203583040	29237.8	290.452		233	-18577536	29237.8	290.452		233	-228984384	29237.8	290.452
	234	3560448	29232.8	290.403		234	50903488	29232.8	290.403		234	44215104	29232.8	290.403		234	213671104	29232.8	290.403		234	-43107072	29232.8	290.403		234	-243105920	29232.8	290.403
	235	-34822784	29227.9	290.353		235	59043904	29227.9	290.353		235	63094784	29227.9	290.353		235	204940928	29227.9	290.353		235	-62355328	29227.9	290.353		235	-246196032	29227.9	290.353
	236	-58353472	29222.9	290.304		236	78440384	29222.9	290.304		236	65915136	29222.9	290.304		236	181522304	29222.9	290.304		236	-68589056	29222.9	290.304		236	-235132864	29222.9	290.304
	237	-59917504	29217.9	290.255		237	104745088	29217.9	290.255		237	55162368	29217.9	290.255		237	148316224	29217.9	290.255		237	-60202240	29217.9	290.255		237	-209501824	29217.9	290.255
	238	-39930496	29213	290.206		238	130042304	29213	290.206		238	35934144	29213	290.206		238	108093056	29213	290.206		238	-41271936	29213	290.206		238	-172557952	29213	290.206
	239	-4931840	29208	290.156		239	145577536	29208	290.156		239	14088064	29208	290.156		239	60609472	29208	290.156		239	-18870144	29208	290.156		239	-130973312	29208	290.156
	240	36495936	29203.1	290.107		240	144984320	29203.1	290.107		240	-5246208	29203.1	290.107		240	4182592	29203.1	290.107		240	540544	29203.1	290.107		240	-93283008	29203.1	290.107
	241	78087872	29198.1	290.058		241	126586496	29198.1	290.058		241	-18291456	29198.1	290.058		241	-61234176	29198.1	290.058		241	13981440	29198.1	290.058		241	-67470400	29198.1	290.058
	242	118164288	29193.1	290.008		242	93767936	29193.1	290.008		242	-22485504	29193.1	290.008		242	-131334080	29193.1	290.008		242	22868480	29193.1	290.008		242	-58510400	29193.1	290.008
	243	158721472	29188.2	289.959		243	53311744	29188.2	289.959		243	-16123456	29188.2	289.959		243	-196879232	29188.2	289.959		243	31674240	29188.2	289.959		243	-66763904	29188.2	289.959
	244	202100864	29183.2	289.91		244	12544512	29183.2	289.91		244	1627456	29183.2	289.91		244	-245997056	29183.2	289.91		244	45093632	29183.2	289.91		244	-87836672	29183.2	289.91
	245	247367360	29178.2	289.861		245	-23354816	29178.2	289.861		245	30122496	29178.2	289.861		245	-268582016	29178.2	289.861		245	65131136	29178.2	289.861		245	-113995328	29178.2	289.861
	246	288697600	29173.3	289.811		246	-52683520	29173.3	289.811		246	66379776	29173.3	289.811		246	-260833280	29173.3	289.811		246	89528448	29173.3	289.811		246	-136656128	29173.3	289.811
	247	316945536	29168.3	289.762		247	-76708608	29168.3	289.762		247	104694720	29168.3	289.762		247	-227698688	29168.3	289.762		247	112296064	29168.3	289.762		247	-149070784	29168.3	289.762
	248	323734912	29163.4	289.713		248	-97789888	29163.4	289.713		248	137405632	29163.4	289.713		248	-181830656	29163.4	289.713		248	126118016	29163.4	289.713		248	-148268736	29163.4	289.713
	249	305910272	29158.4	289.663		249	-117245632	29158.4	289.663		249	156961408	29158.4	289.663		249	-139238272	29158.4	289.663		249	125537280	29158.4	289.663		249	-135610880	29158.4	289.663
	250	267822720	29153.4	289.614		250	-134122624	29153.4	289.614		250	158690432	29153.4	289.614		250	-113368448	29153.4	289.614		250	109468544	29153.4	289.614		250	-115840192	29153.4	289.614
	251	219949440	29148.5	289.565		251	-145485568	29148.5	289.565		251	143094848	29148.5	289.565		251	-110135872	29148.5	289.565		251	81914624	29148.5	289.565		251	-95077056	29148.5	289.565
	252	174261120	29143.5	289.515		252	-147987328	29143.5	289.515		252	116451968	29143.5	289.515		252	-126046208	29143.5	289.515		252	50575872	29143.5	289.515		252	-78575616	29143.5	289.515
	253	138538112	29138.5	289.466		253	-139802176	29138.5	289.466		253	89105984	29138.5	289.466		253	-150192960	29138.5	289.466		253	23990528	29138.5	289.466		253	-69090560	29138.5	289.466
	254	112543936	29133.6	289.417		254	-121837056	29133.6	289.417		254	71843776	29133.6	289.417		254	-169191360	29133.6	289.417		254	8467200	29133.6	289.417		254	-66410304	29133.6	289.417
	255	88153600	29128.6	289.368		255	-97570624	29128.6	289.368		255	71704512	29128.6	289.368		255	-172846592	29128.6	289.368		255	6107392	29128.6	289.368		255	-68107328	29128.6	289.368
	256	53586688	29123.7	289.318		256	-71644032	29123.7	289.318		256	88989120	29123.7	289.318		256	-158115136	29123.7	289.318		256	14670080	29123.7	289.318		256	-71070784	29123.7	289.318
	257	-219392	29118.7	289.269		257	-48014912	29118.7	289.269		257	116850048	29118.7	289.269		257	-129782592	29118.7	289.269		257	29170944	29118.7	289.269		257	-73101312	29118.7	289.269
	258	-74239488	29113.7	289.22		258	-28704192	29113.7	289.22		258	143781184	29113.7	289.22		258	-97814784	29113.7	289.22		258	44353792	29113.7	289.22		258	-73885312	29113.7	289.22
	259	-159734720	29108.8	289.17		259	-13794112	29108.8	289.17		259	158051456	29108.8	289.17		259	-72806080	29108.8	289.17		259	56841728	29108.8	289.17		259	-74979456	29108.8	289.17
	260	-241299648	29103.8	289.121		260	-2583360	29103.8	289.121		260	152227200	29103.8	289.121		260	-61671296	29103.8	289.121		260	66026368	29103.8	289.121		260	-78885504	29103.8	289.121
	261	-303177280	29098.9	289.072		261	4893120	29098.9	289.072		261	125850432	29098.9	289.072		261	-65429248	29098.9	289.072		261	73409920	29098.9	289.072		261	-87676864	29098.9	289.072
	262	-335779392	29093.9	289.023		262	7026752	29093.9	289.023		262	85153024	29093.9	289.023		262	-79800576	29093.9	289.023		262	80879104	29093.9	289.023		262	-101798144	29093.9	289.023
	263	-339228032	29088.9	288.973		263	1154176	29088.9	288.973		263	40022528	29088.9	288.973		263	-97987008	29088.9	288.973		263	88863488	29088.9	288.973		263	-119538112	29088.9	288.973
	264	-322231744	29084	288.924		264	-14693504	29084	288.924		264	-315520	29084	288.924		264	-114054464	29084	288.924		264	95344000	29084	288.924		264	-137360064	29084	288.924
	265	-296984576	29079	288.875		265	-39734784	29079	288.875		265	-30867776	29079	288.875		265	-125235520	29079	288.875		265	96209408	29079	288.875		265	-150906240	29079	288.875
	266	-272803200	29074	288.825		266	-69332608	29074	288.825		266	-52060544	29074	288.825		266	-132172480	29074	288.825		266	86787840	29074	288.825		266	-156248000	29074	288.825
	267	-251846528	29069.1	288.776		267	-95731264	29069.1	288.776		267	-68085888	29069.1	288.776		267	-137241664	29069.1	288.776		267	63813248	29069.1	288.776		267	-150915840	29069.1	288.776
	268	-229149248	29064.1	288.727		268	-110618176	29064.1	288.727		268	-83342528	29064.1	288.727		268	-142057600	29064.1	288.727		268	26897536	29064.1	288.727		268	-134406848	29064.1	288.727
	269	-196895744	29059.2	288.677		269	-108482496	29059.2	288.677		269	-98860864	29059.2	288.677		269	-145598016	29059.2	288.677		269	-21150976	29059.2	288.677		269	-108121984	29059.2	288.677
	270	-150560896	29054.2	288.628		270	-89185664	29054.2	288.628		270	-110630336	29054.2	288.628		270	-143994624	29054.2	288.628		270	-75265280	29054.2	288.628		270	-74902720	29054.2	288.628
	271	-93455744	29049.2	288.579		271	-58384512	29049.2	288.579		271	-110841856	29049.2	288.579		271	-132141312	29049.2	288.579		271	-129815936	29049.2	288.579		271	-38417984	29049.2	288.579
	272	-36952000	29044.3	288.53		272	-25400320	29044.3	288.53		272	-91620672	29044.3	288.53		272	-106351872	29044.3	288.53		272	-180251264	29044.3	288.53		272	-2590144	29044.3	288.53
	273	4110848	29039.3	288.48		273	631936	29039.3	288.48		273	-49556224	29039.3	288.48		273	-66784896	29039.3	288.48		273	-223949696	29039.3	288.48		273	28883584	29039.3	288.48
	274	18734528	29034.3	288.431		274	14602368	29034.3	288.431		274	11165184	29034.3	288.431		274	-18472960	29034.3	288.431		274	-259980416	29034.3	288.431		274	52961536	29034.3	288.431
	275	6060672	29029.4	288.382		275	17427840	29029.4	288.382		275	78689792	29029.4	288.382		275	29567424	29029.4	288.382		275	-288044800	29029.4	288.382		275	67687040	29029.4	288.382
	276	-22808960	29024.4	288.332		276	15206272	29024.4	288.332		276	136817984	29024.4	288.332		276	66830656	29024.4	288.332		276	-307273216	29024.4	288.332		276	72567936	29024.4	288.332
	277	-48863872	29019.5	288.283		277	15856384	29019.5	288.283		277	170526592	29019.5	288.283		277	84469632	29019.5	288.283		277	-315626112	29019.5	288.283		277	68745536	29019.5	288.283
	278	-53575360	29014.5	288.234		278	24804608	29014.5	288.234		278	171473856	29014.5	288.234		278	77951168	29014.5	288.234		278	-310322944	29014.5	288.234		278	58758976	29014.5	288.234
	279	-27787584	29009.5	288.184		279	41784384	29009.5	288.184		279	141215616	29009.5	288.184		279	48356480	29009.5	288.184		279	-289195008	29009.5	288.184		279	45828544	29009.5	288.184
	280	23228544	29004.6	288.135		280	60321728	29004.6	288.135		280	90800256	29004.6	288.135		280	2021120	29004.6	288.135		280	-252345600	29004.6	288.135		280	32808576	29004.6	288.135
	281	81256832	28999.6	288.086		281	70221568	28999.6	288.086		281	36909632	28999.6	288.086		281	-51213888	28999.6	288.086		281	-203289728	28999.6	288.086		281	21187904	28999.6	288.086
	282	122806976	28994.6	288.037		282	61945664	28994.6	288.037		282	-3889472	28994.6	288.037		282	-100508800	28994.6	288.037		282	-148907776	28994.6	288.037		282	10604608	28994.6	288.037
	283	129634368	28989.7	287.987		283	30876992	28989.7	287.987		283	-20530624	28989.7	287.987		283	-136570240	28989.7	287.987		283	-98041088	28989.7	287.987		283	-805504	28989.7	287.987
	284	97285056	28984.7	287.938		284	-20469824	28984.7	287.938		284	-10496384	28984.7	287.938		284	-153654336	28984.7	287.938		284	-59149824	28984.7	287.938		284	-15248896	28984.7	287.938
	285	37635648	28979.8	287.889		285	-83240448	28979.8	287.889		285	20368576	28979.8	287.889		285	-150658944	28979.8	287.889		285	-37891200	28979.8	287.889		285	-33732352	28979.8	287.889
	286	-25872384	28974.8	287.839		286	-145567616	28974.8	287.839		286	60831424	28974.8	287.839		286	-131145792	28974.8	287.839		286	-35543936	28974.8	287.839		286	-54825344	28974.8	287.839
	287	-68219648	28969.8	287.79		287	-196816384	28969.8	287.79		287	98554816	28969.8	287.79		287	-102299392	28969.8	287.79		287	-48897024	28969.8	287.79		287	-74375744	28969.8	287.79
	288	-73496960	28964.9	287.741		288	-230804736	28964.9	287.741		288	123917632	28964.9	287.741		288	-72998080	28964.9	287.741		288	-71637248	28964.9	287.741		288	-86467392	28964.9	287.741
	289	-41457536	28959.9	287.692		289	-246686848	28959.9	287.692		289	132071488	28959.9	287.692		289	-51383168	28959.9	287.692		289	-96679424	28959.9	287.692		289	-85369856	28959.9	287.692
	290	12967808	28954.9	287.642		290	-247425280	28954.9	287.642		290	122884608	28954.9	287.642		290	-42516544	28954.9	287.642		290	-118517632	28954.9	287.642		290	-67753024	28954.9	287.642
	291	66817280	28950	287.593		291	-236979456	28950	287.593		291	99355520	28950	287.593		291	-46835392	28950	287.593		291	-134701440	28950	287.593		291	-34257280	28950	287.593
	292	99485440	28945	287.544		292	-217893760	28945	287.544		292	65590848	28945	287.544		292	-59995520	28945	287.544		292	-145915904	28945	287.544		292	10270656	28945	287.544
	293	101532672	28940.1	287.494		293	-190610304	28940.1	287.494		293	25352704	28940.1	287.494		293	-74315968	28940.1	287.494		293	-154738432	28940.1	287.494		293	58028736	28940.1	287.494
	294	77977216	28935.1	287.445		294	-154777856	28935.1	287.445		294	-18363136	28935.1	287.445		294	-81467520	28935.1	287.445		294	-163679232	28935.1	287.445		294	100532224	28935.1	287.445
	295	44808960	28930.1	287.396		295	-111647168	28930.1	287.396		295	-62917184	28930.1	287.396		295	-75514112	28930.1	287.396		295	-173393920	28930.1	287.396		295	131029184	28930.1	287.396
	296	20644608	28925.2	287.346		296	-65975168	28925.2	287.346		296	-105414464	28925.2	287.346		296	-55177216	28925.2	287.346		296	-181857792	28925.2	287.346		296	146159552	28925.2	287.346
	297	17608128	28920.2	287.297		297	-26063168	28920.2	287.297		297	-142527168	28920.2	287.297		297	-24403712	28920.2	287.297		297	-184876672	28920.2	287.297		297	146328576	28920.2	287.297
	298	35707200	28915.3	287.248		298	-1536384	28915.3	287.248		298	-171024064	28915.3	287.248		298	9045056	28915.3	287.248		298	-177742592	28915.3	287.248		298	134845888	28915.3	287.248
	299	63162880	28910.3	287.199		299	277952	28910.3	287.199		299	-188786624	28910.3	287.199		299	36458176	28910.3	287.199		299	-157368576	28910.3	287.199		299	116381440	28910.3	287.199
	300	82290240	28905.3	287.149		300	-22339840	28905.3	287.149		300	-195757056	28905.3	287.149		300	51344256	28905.3	287.149		300	-124034688	28905.3	287.149		300	95478848	28905.3	287.149
	301	77987456	28900.4	287.1		301	-64217664	28900.4	287.1		301	-194254528	28900.4	287.1		301	51613184	28900.4	287.1		301	-82026496	28900.4	287.1		301	75681024	28900.4	287.1
	302	44854528	28895.4	287.051		302	-114846720	28895.4	287.051		302	-188407296	28895.4	287.051		302	39912256	28895.4	287.051		302	-38871424	28895.4	287.051		302	59385728	28895.4	287.051
	303	-10194688	28890.4	287.001		303	-162243200	28890.4	287.001		303	-182883520	28890.4	287.001		303	22079360	28890.4	287.001		303	-3408768	28890.4	287.001		303	48123840	28890.4	287.001
	304	-70737088	28885.5	286.952		304	-197428800	28885.5	286.952		304	-181437056	28885.5	286.952		304	4516096	28885.5	286.952		304	16646528	28885.5	286.952		304	42775936	28885.5	286.952
	305	-117499776	28880.5	286.903		305	-217498176	28880.5	286.903		305	-185837184	28880.5	286.903		305	-8265088	28880.5	286.903		305	16834304	28880.5	286.903		305	43399872	28880.5	286.903
	306	-135754304	28875.6	286.854		306	-225877504	28875.6	286.854		306	-195539712	28875.6	286.854		306	-14812864	28875.6	286.854		306	-2900480	28875.6	286.854		306	48736896	28875.6	286.854
	307	-120311168	28870.6	286.804		307	-229701056	28870.6	286.804		307	-208096512	28870.6	286.804		307	-16201984	28870.6	286.804		307	-38336640	28870.6	286.804		307	55832000	28870.6	286.804
	308	-76374272	28865.6	286.755		308	-235607424	28865.6	286.755		308	-220015360	28865.6	286.755		308	-14246144	28865.6	286.755		308	-82241536	28865.6	286.755		308	60304256	28865.6	286.755
	309	-16513536	28860.7	286.706		309	-246006720	28860.7	286.706		309	-227681792	28860.7	286.706		309	-9551872	28860.7	286.706		309	-126304384	28860.7	286.706		309	57533440	28860.7	286.706
	310	44382272	28855.7	286.656		310	-257632064	28855.7	286.656		310	-228076608	28855.7	286.656		310	-583808	28855.7	286.656		310	-163126912	28855.7	286.656		310	44495936	28855.7	286.656
	311	93807552	28850.7	286.607		311	-263080128	28850.7	286.607		311	-219233728	28850.7	286.607		311	15622080	28850.7	286.607		311	-187759872	28850.7	286.607		311	21484608	28850.7	286.607
	312	124293952	28845.8	286.558		312	-254607232	28845.8	286.558		312	-200537344	28845.8	286.558		312	41350528	28845.8	286.558		312	-198493824	28845.8	286.558		312	-7215808	28845.8	286.558
	313	133654912	28840.8	286.508		313	-228368704	28840.8	286.508		313	-172956224	28840.8	286.508		313	75757376	28840.8	286.508		313	-196865536	28840.8	286.508		313	-34295040	28840.8	286.508
	314	123664064	28835.9	286.459		314	-187083712	28835.9	286.459		314	-139176832	28835.9	286.459		314	113434880	28835.9	286.459		314	-187017344	28835.9	286.459		314	-51902784	28835.9	286.459
	315	98491648	28830.9	286.41		315	-139852352	28830.9	286.41		315	-103443968	28830.9	286.41		315	144983040	28830.9	286.41		315	-174618752	28830.9	286.41		315	-54747840	28830.9	286.41
	316	63823552	28825.9	286.361		316	-99166272	28825.9	286.361		316	-70900608	28825.9	286.361		316	159686208	28825.9	286.361		316	-165552128	28825.9	286.361		316	-42468672	28825.9	286.361
	317	26694784	28821	286.311		317	-76420288	28821	286.311		317	-46400448	28821	286.311		317	149391744	28821	286.311		317	-164555648	28821	286.311		317	-20115776	28821	286.311
	318	-4700032	28816	286.262		318	-77838336	28816	286.262		318	-33073856	28816	286.262		318	112040576	28816	286.262		318	-174032384	28816	286.262		318	3646208	28816	286.262
	319	-22083392	28811	286.213		319	-102451904	28811	286.213		319	-31194112	28811	286.213		319	53317696	28811	286.213		319	-193281920	28811	286.213		319	19966784	28811	286.213
	320	-19321024	28806.1	286.163		320	-142780544	28806.1	286.163		320	-37918528	28806.1	286.163		320	-14410496	28806.1	286.163		320	-218423040	28806.1	286.163		320	23408896	28806.1	286.163
	321	4899008	28801.1	286.114		321	-187668224	28801.1	286.114		321	-48190656	28801.1	286.114		321	-75632000	28801.1	286.114		321	-243184128	28801.1	286.114		321	14092736	28801.1	286.114
	322	45330048	28796.2	286.065		322	-225911104	28796.2	286.065		322	-56577344	28796.2	286.065		322	-116466688	28796.2	286.065		322	-260504704	28796.2	286.065		322	-2642560	28796.2	286.065
	323	90703744	28791.2	286.015		323	-249191360	28791.2	286.015		323	-59321856	28791.2	286.015		323	-128970816	28791.2	286.015		323	-264589952	28791.2	286.015		323	-18960832	28791.2	286.015
	324	126966784	28786.2	285.966		324	-253406784	28786.2	285.966		324	-55691264	28786.2	285.966		324	-113453312	28786.2	285.966		324	-252790656	28786.2	285.966		324	-28402944	28786.2	285.966
	325	142293952	28781.3	285.917		325	-238374976	28781.3	285.917		325	-47937408	28781.3	285.917		325	-78068160	28781.3	285.917		325	-226621312	28781.3	285.917		325	-29098112	28781.3	285.917
	326	131873856	28776.3	285.868		326	-206624832	28776.3	285.868		326	-39814656	28776.3	285.868		326	-35956416	28776.3	285.868		326	-191448960	28776.3	285.868		326	-24749056	28776.3	285.868
	327	100262784	28771.3	285.818		327	-162208384	28771.3	285.818		327	-34318976	28771.3	285.818		327	-1040384	28771.3	285.818		327	-154845696	28771.3	285.818		327	-22847808	28771.3	285.818
	328	59982272	28766.4	285.769		328	-110123968	28766.4	285.769		328	-31778048	28766.4	285.769		328	16069056	28766.4	285.769		328	-124146048	28766.4	285.769		328	-30884032	28766.4	285.769
	329	26651968	28761.4	285.72		329	-56301312	28761.4	285.72		329	-29348608	28761.4	285.72		329	10790528	28761.4	285.72		329	-104116480	28761.4	285.72		329	-52293248	28761.4	285.72
	330	12556480	28756.5	285.67		330	-7575744	28756.5	285.67		330	-22355008	28756.5	285.67		330	-14752896	28756.5	285.67		330	-95663744	28756.5	285.67		330	-84073792	28756.5	285.67
	331	21356288	28751.5	285.621		331	29011136	28751.5	285.621		331	-6989120	28751.5	285.621		331	-53047680	28751.5	285.621		331	-96098688	28751.5	285.621		331	-117282304	28751.5	285.621
	332	46264768	28746.5	285.572		332	47825984	28746.5	285.572		332	16878592	28746.5	285.572		332	-93858432	28746.5	285.572		332	-100811136	28746.5	285.572		332	-140312320	28746.5	285.572
	333	72552832	28741.6	285.523		333	46739200	28741.6	285.523		333	44246528	28741.6	285.523		333	-127340416	28741.6	285.523		333	-105562752	28741.6	285.523		333	-143585600	28741.6	285.523
	334	83387776	28736.6	285.473		334	28721344	28736.6	285.473		334	65861184	28736.6	285.473		334	-146709632	28736.6	285.473		334	-108308224	28736.6	285.473		334	-123625728	28736.6	285.473
	335	66586560	28731.6	285.424		335	1910912	28731.6	285.424		335	71373760	28731.6	285.424		335	-149832000	28731.6	285.424		335	-109655552	28731.6	285.424		335	-84745408	28731.6	285.424
	336	19516608	28726.7	285.375		336	-22341248	28726.7	285.375		336	53608128	28726.7	285.375		336	-139427776	28726.7	285.375		336	-111742336	28726.7	285.375		336	-37636416	28726.7	285.375
	337	-49780608	28721.7	285.325		337	-33038528	28721.7	285.325		337	12117056	28721.7	285.325		337	-121927232	28721.7	285.325		337	-116110464	28721.7	285.325		337	4507200	28721.7	285.325
	338	-125543872	28716.8	285.276		338	-23464256	28716.8	285.276		338	-45651712	28716.8	285.276		338	-105311424	28716.8	285.276		338	-121740032	28716.8	285.276		338	30671872	28716.8	285.276
	339	-189966144	28711.8	285.227		339	6119616	28711.8	285.227		339	-106324736	28711.8	285.227		339	-96509888	28711.8	285.227		339	-124419456	28711.8	285.227		339	35610112	28711.8	285.227
	340	-229263104	28706.8	285.177		340	48219008	28706.8	285.177		340	-155109568	28706.8	285.177		340	-99083712	28706.8	285.177		340	-118038528	28706.8	285.177		340	21016768	28706.8	285.177
	341	-237859776	28701.9	285.128		341	90550208	28701.9	285.128		341	-181098368	28701.9	285.128		341	-111918528	28701.9	285.128		341	-97422208	28701.9	285.128		341	-5899072	28701.9	285.128
	342	-219386304	28696.9	285.079		342	120313472	28696.9	285.079		342	-181197824	28696.9	285.079		342	-129448960	28696.9	285.079		342	-61451520	28696.9	285.079		342	-35551232	28696.9	285.079
	343	-184517760	28692	285.03		343	128641600	28692	285.03		343	-161040512	28692	285.03		343	-143505280	28692	285.03		343	-14874368	28692	285.03		343	-59350016	28692	285.03
	344	-146829760	28687	284.98		344	113488064	28687	284.98		344	-132479104	28687	284.98		344	-146317376	28687	284.98		344	32353024	28687	284.98		344	-71990464	28687	284.98
	345	-118335296	28682	284.931		345	79879872	28682	284.931		345	-108708992	28682	284.931		345	-133713024	28682	284.931		345	68287744	28682	284.931		345	-72050432	28682	284.931
	346	-106156416	28677.1	284.882		346	37566208	28677.1	284.882		346	-99054400	28677.1	284.882		346	-107330240	28677.1	284.882		346	83639040	28677.1	284.882		346	-61162176	28677.1	284.882
	347	-111110784	28672.1	284.832		347	-2848000	28672.1	284.832		347	-105558592	28672.1	284.832		347	-74874432	28672.1	284.832		347	75853824	28672.1	284.832		347	-42596288	28672.1	284.832
	348	-128248832	28667.1	284.783		348	-33641600	28667.1	284.783		348	-122696064	28667.1	284.783		348	-48083136	28667.1	284.783		348	50718848	28667.1	284.783		348	-20129664	28667.1	284.783
	349	-148853312	28662.2	284.734		349	-52121600	28662.2	284.734		349	-140164544	28662.2	284.734		349	-38915520	28662.2	284.734		349	20502528	28662.2	284.734		349	2382592	28662.2	284.734
	350	-163217216	28657.2	284.685		350	-60483904	28657.2	284.685		350	-147415488	28657.2	284.685		350	-55221504	28657.2	284.685		350	-834560	28657.2	284.685		350	20924096	28657.2	284.685
	351	-163531840	28652.3	284.635		351	-63723328	28652.3	284.635		351	-137931584	28652.3	284.635		351	-97466368	28652.3	284.635		351	-3458688	28652.3	284.635		351	31312320	28652.3	284.635
	352	-146294208	28647.3	284.586		352	-66708096	28647.3	284.586		352	-111502208	28647.3	284.586		352	-157795648	28647.3	284.586		352	13996928	28647.3	284.586		352	29805632	28647.3	284.586
	353	-113681216	28642.3	284.537		353	-71782080	28642.3	284.537		353	-73743744	28642.3	284.537		353	-221921664	28642.3	284.537		353	43574016	28642.3	284.537		353	14389952	28642.3	284.537
	354	-73407360	28637.4	284.487		354	-77882048	28637.4	284.487		354	-33367040	28637.4	284.487		354	-273279424	28637.4	284.487		354	71163392	28637.4	284.487		354	-13772864	28637.4	284.487
	355	-36815616	28632.4	284.438		355	-81395968	28632.4	284.438		355	1375616	28632.4	284.438		355	-298048448	28632.4	284.438		355	82502144	28632.4	284.438		355	-49596928	28632.4	284.438
	356	-15441536	28627.4	284.389		356	-78200768	28627.4	284.389		356	25421696	28627.4	284.389		356	-289315520	28627.4	284.389		356	69473280	28627.4	284.389		356	-84737088	28627.4	284.389
	357	-16935936	28622.5	284.339		357	-65856320	28622.5	284.339		357	37733184	28622.5	284.339		357	-248982144	28622.5	284.339		357	33975296	28622.5	284.339		357	-109778368	28622.5	284.339
	358	-41750720	28617.5	284.29		358	-44962816	28617.5	284.29		358	40183040	28617.5	284.29		358	-186864064	28617.5	284.29		358	-12377984	28617.5	284.29		358	-117289280	28617.5	284.29
	359	-82043968	28612.6	284.241		359	-19147072	28612.6	284.241		359	35392064	28612.6	284.241		359	-117444736	28612.6	284.241		359	-52677760	28612.6	284.241		359	-104542400	28612.6	284.241
	360	-123641664	28607.6	284.192		360	6218624	28607.6	284.192		360	24854336	28607.6	284.192		360	-55523712	28607.6	284.192		360	-71410560	28607.6	284.192		360	-74711040	28607.6	284.192
	361	-150736640	28602.6	284.142		361	25941312	28602.6	284.142		361	8408320	28602.6	284.142		361	-12266688	28602.6	284.142		361	-60589696	28602.6	284.142		361	-35928320	28602.6	284.142
	362	-151750656	28597.7	284.093		362	36761728	28597.7	284.093		362	-14704064	28597.7	284.093		362	7146432	28597.7	284.093		362	-22749312	28597.7	284.093		362	1503808	28597.7	284.093
	363	-124040768	28592.7	284.044		363	38294848	28592.7	284.044		363	-43874368	28592.7	284.044		363	3786112	28592.7	284.044		363	30376704	28592.7	284.044		363	28666432	28592.7	284.044
	364	-75347008	28587.7	283.994		364	32924032	28587.7	283.994		364	-75493760	28587.7	283.994		364	-16558976	28587.7	283.994		364	82782208	28587.7	283.994		364	40928384	28587.7	283.994
	365	-21091776	28582.8	283.945		365	24846464	28582.8	283.945		365	-102790208	28582.8	283.945		365	-45868288	28582.8	283.945		365	120492416	28582.8	283.945		365	39099776	28582.8	283.945
	366	21598144	28577.8	283.896		366	18736192	28577.8	283.896		366	-117553856	28577.8	283.896		366	-76352128	28577.8	283.896		366	136520960	28577.8	283.896		366	28506752	28577.8	283.896
	367	40747776	28572.9	283.847		367	18511808	28572.9	283.847		367	-113194560	28572.9	283.847		367	-102163648	28572.9	283.847		367	132508928	28572.9	283.847		367	16530752	28572.9	283.847
	368	34326848	28567.9	283.797		368	26516032	28567.9	283.797		368	-87807040	28567.9	283.797		368	-120093376	28567.9	283.797		368	116653312	28567.9	283.797		368	9727296	28567.9	283.797
	369	10811264	28562.9	283.748		369	43166720	28562.9	283.748		369	-45765888	28562.9	283.748		369	-129418688	28562.9	283.748		369	99208576	28562.9	283.748		369	11669696	28562.9	283.748
	370	-14836032	28558	283.699		370	66961024	28558	283.699		370	3078144	28558	283.699		370	-131314368	28558	283.699		370	87818752	28558	283.699		370	22203456	28558	283.699
	371	-28047488	28553	283.649		371	94676032	28553	283.649		371	46500352	28553	283.649		371	-128211584	28553	283.649		371	84796544	28553	283.649		371	38109504	28553	283.649
	372	-21333312	28548	283.6		372	121698624	28548	283.6		372	74161280	28548	283.6		372	-123297472	28548	283.6		372	87348992	28548	283.6		372	54612416	28548	283.6
	373	2261440	28543.1	283.551		373	142536832	28543.1	283.551		373	81306560	28543.1	283.551		373	-120126464	28543.1	283.551		373	90221184	28543.1	283.551		373	66978176	28543.1	283.551
	374	30506880	28538.1	283.501		374	151620480	28538.1	283.501		374	70357056	28538.1	283.501		374	-122195072	28538.1	283.501		374	89094528	28538.1	283.501		374	71639488	28538.1	283.501
	375	47516352	28533.2	283.452		375	144423040	28533.2	283.452		375	49688768	28533.2	283.452		375	-132367680	28533.2	283.452		375	82839424	28533.2	283.452		375	66697280	28533.2	283.452
	376	40891584	28528.2	283.403		376	118752640	28528.2	283.403		376	30077632	28528.2	283.403		376	-152190976	28528.2	283.403		376	73494144	28528.2	283.403		376	51987456	28528.2	283.403
	377	7187968	28523.2	283.354		377	75863616	28523.2	283.354		377	20268864	28523.2	283.354		377	-181290368	28523.2	283.354		377	64171520	28523.2	283.354		377	29005440	28523.2	283.354
	378	-46772160	28518.3	283.304		378	20935104	28518.3	283.304		378	23503616	28518.3	283.304		378	-217108288	28518.3	283.304		378	56270720	28518.3	283.304		378	812928	28518.3	283.304
	379	-107219008	28513.3	283.255		379	-37454272	28513.3	283.255		379	36427904	28513.3	283.255		379	-255176384	28513.3	283.255		379	47787264	28513.3	283.255		379	-28203648	28513.3	283.255
	380	-159658048	28508.3	283.206		380	-88954368	28508.3	283.206		380	50801344	28508.3	283.206		380	-289937344	28508.3	283.206		380	33920640	28508.3	283.206		380	-52985152	28508.3	283.206
	381	-194927168	28503.4	283.156		381	-123883328	28503.4	283.156		381	57244224	28503.4	283.156		381	-315930176	28503.4	283.156		381	9903232	28503.4	283.156		381	-68992320	28503.4	283.156
	382	-212180864	28498.4	283.107		382	-135837696	28498.4	283.107		382	49416640	28498.4	283.107		382	-329015424	28498.4	283.107		382	-25342720	28498.4	283.107		382	-73713536	28498.4	283.107
	383	-217486144	28493.5	283.058		383	-123649088	28493.5	283.058		383	26861120	28493.5	283.058		383	-327297792	28493.5	283.058		383	-66752640	28493.5	283.058		383	-67908416	28493.5	283.058
	384	-218936768	28488.5	283.008		384	-91968256	28488.5	283.008		384	-4672960	28488.5	283.008		384	-311500032	28488.5	283.008		384	-103494528	28488.5	283.008		384	-55896512	28488.5	283.008
	385	-220951232	28483.5	282.959		385	-50139776	28483.5	282.959		385	-35533952	28483.5	282.959		385	-284708672	28483.5	282.959		385	-122491520	28483.5	282.959		385	-44483648	28483.5	282.959
	386	-220828800	28478.6	282.91		386	-9583744	28478.6	282.91		386	-56106176	28478.6	282.91		386	-251586304	28478.6	282.91		386	-113813120	28478.6	282.91		386	-40708160	28478.6	282.91
	387	-209501824	28473.6	282.861		387	19559104	28473.6	282.861		387	-60715520	28473.6	282.861		387	-217270464	28473.6	282.861		387	-75572608	28473.6	282.861		387	-49211392	28473.6	282.861
	388	-176282944	28468.7	282.811		388	31442816	28468.7	282.811		388	-49871360	28468.7	282.811		388	-186233408	28468.7	282.811		388	-15951744	28468.7	282.811		388	-70347328	28468.7	282.811
	389	-115341312	28463.7	282.762		389	26158272	28463.7	282.762		389	-29930944	28463.7	282.762		389	-161368512	28463.7	282.762		389	48891008	28463.7	282.762		389	-99931904	28463.7	282.762
	390	-30655936	28458.7	282.713		390	9397312	28458.7	282.713		390	-10362432	28458.7	282.713		390	-143499904	28458.7	282.713		390	100468352	28458.7	282.713		390	-130846528	28458.7	282.713
	391	63189952	28453.8	282.663		391	-9789184	28453.8	282.663		391	214080	28453.8	282.663		391	-131415936	28453.8	282.663		391	124967168	28453.8	282.663		391	-155851072	28453.8	282.663
	392	145096960	28448.8	282.614		392	-22359616	28448.8	282.614		392	-2468928	28448.8	282.614		392	-122406720	28448.8	282.614		392	118682368	28448.8	282.614		392	-170363968	28448.8	282.614
	393	194835136	28443.8	282.565		393	-22555072	28443.8	282.565		393	-16747072	28443.8	282.565		393	-113162688	28443.8	282.565		393	89524736	28443.8	282.565		393	-173948224	28443.8	282.565
	394	200569216	28438.9	282.516		394	-9852608	28438.9	282.516		394	-36016896	28438.9	282.516		394	-100794304	28438.9	282.516		394	53873536	28438.9	282.516		394	-169841152	28438.9	282.516
	395	163252352	28433.9	282.466		395	11148864	28433.9	282.466		395	-51862464	28433.9	282.466		395	-83692160	28433.9	282.466		395	30018432	28433.9	282.466		395	-162816320	28433.9	282.466
	396	96033408	28429	282.417		396	32861056	28429	282.417		396	-57976448	28429	282.417		396	-61986496	28429	282.417		396	30878080	28429	282.417		396	-156484480	28429	282.417
	397	19057472	28424	282.368		397	48001600	28424	282.368		397	-53197056	28424	282.368		397	-37489856	28424	282.368		397	58973824	28424	282.368		397	-151414656	28424	282.368
	398	-47960256	28419	282.318		398	52706432	28419	282.318		398	-42343488	28419	282.318		398	-13176640	28419	282.318		398	105641472	28419	282.318		398	-145029440	28419	282.318
	399	-92169152	28414.1	282.269		399	48165184	28414.1	282.269		399	-34440064	28414.1	282.269		399	7593408	28414.1	282.269		399	154671616	28414.1	282.269		399	-133300032	28414.1	282.269
	400	-110474432	28409.1	282.22		400	40076608	28409.1	282.22		400	-39002688	28409.1	282.22		400	21830528	28409.1	282.22		400	188740096	28409.1	282.22		400	-113316096	28409.1	282.22
	401	-108116096	28404.1	282.17		401	36127808	28404.1	282.17		401	-61868480	28404.1	282.17		401	27416064	28404.1	282.17		401	195944832	28404.1	282.17		401	-85324544	28404.1	282.17
	402	-94170240	28399.2	282.121		402	42548480	28399.2	282.121		402	-102258496	28399.2	282.121		402	23266048	28399.2	282.121		402	173881984	28399.2	282.121		402	-53087616	28399.2	282.121
	403	-76471616	28394.2	282.072		403	61204608	28394.2	282.072		403	-152282752	28394.2	282.072		403	9238528	28394.2	282.072		403	129874048	28394.2	282.072		403	-22291648	28394.2	282.072
	404	-58427392	28389.3	282.023		404	88490688	28389.3	282.023		404	-199134976	28389.3	282.023		404	-14015232	28389.3	282.023		404	77622912	28389.3	282.023		404	2210176	28389.3	282.023
	405	-38983488	28384.3	281.973		405	116524224	28384.3	281.973		405	-229171968	28384.3	281.973		405	-45075200	28384.3	281.973		405	31958272	28384.3	281.973		405	18862400	28384.3	281.973
	406	-15277184	28379.3	281.924		406	136159808	28379.3	281.924		406	-232351872	28379.3	281.924		406	-81599680	28379.3	281.924		406	3920896	28379.3	281.924		406	30203520	28379.3	281.924
	407	13831360	28374.4	281.875		407	140554880	28374.4	281.875		407	-205405632	28374.4	281.875		407	-120134400	28374.4	281.875		407	-2006912	28374.4	281.875		407	41442944	28374.4	281.875
	408	45482880	28369.4	281.825		408	127788160	28369.4	281.825		408	-152644928	28369.4	281.825		408	-156144256	28369.4	281.825		408	12155392	28369.4	281.825		408	57436672	28369.4	281.825
	409	73122560	28364.4	281.776		409	101451968	28364.4	281.776		409	-84253056	28364.4	281.776		409	-184516096	28364.4	281.776		409	40185728	28364.4	281.776		409	79583360	28364.4	281.776
	410	89251456	28359.5	281.727		410	69035072	28359.5	281.727		410	-12843776	28359.5	281.727		410	-200589696	28359.5	281.727		410	74781184	28359.5	281.727		410	104317952	28359.5	281.727
	411	89152512	28354.5	281.678		411	38869248	28354.5	281.678		411	50340864	28354.5	281.678		411	-201491904	28354.5	281.678		411	110012544	28354.5	281.678		411	124162496	28354.5	281.678
	412	73582976	28349.6	281.628		412	17001280	28349.6	281.628		412	98226688	28349.6	281.628		412	-187308224	28349.6	281.628		412	142216576	28349.6	281.628		412	131024128	28349.6	281.628
	413	48941952	28344.6	281.579		413	5313856	28344.6	281.579		413	128854784	28344.6	281.579		413	-161553344	28344.6	281.579		413	169360128	28344.6	281.579		413	120247296	28344.6	281.579
	414	24699136	28339.6	281.53		414	1578816	28339.6	281.53		414	144455360	28339.6	281.53		414	-130583424	28339.6	281.53		414	189670656	28339.6	281.53		414	93424320	28339.6	281.53
	415	9246784	28334.7	281.48		415	1214336	28334.7	281.48		415	149343040	28334.7	281.48		415	-101969024	28334.7	281.48		415	200587392	28334.7	281.48		415	58450560	28334.7	281.48
	416	6125696	28329.7	281.431		416	-251392	28329.7	281.431		416	147689344	28329.7	281.431		416	-82280768	28329.7	281.431		416	198776448	28329.7	281.431		416	26572224	28329.7	281.431
	417	12401344	28324.7	281.382		417	-5245056	28324.7	281.382		417	142097088	28324.7	281.382		417	-75034240	28324.7	281.382		417	181282304	28324.7	281.382		417	7628224	28324.7	281.382
	418	19951232	28319.8	281.332		418	-13610432	28319.8	281.332		418	133396288	28319.8	281.332		418	-79555456	28319.8	281.332		418	147226240	28319.8	281.332		418	5623680	28319.8	281.332
	419	19074368	28314.8	281.283		419	-23553984	28314.8	281.283		419	121460160	28314.8	281.283		419	-91226432	28314.8	281.283		419	99135872	28314.8	281.283		419	16716736	28314.8	281.283
	420	2809216	28309.9	281.234		420	-33372160	28309.9	281.234		420	106403008	28309.9	281.234		420	-103068096	28309.9	281.234		420	43138816	28309.9	281.234		420	30647552	28309.9	281.234
	421	-29902336	28304.9	281.185		421	-42872384	28304.9	281.185		421	89428864	28304.9	281.185		421	-108104704	28304.9	281.185		421	-12233344	28304.9	281.185		421	35079360	28304.9	281.185
	422	-73477568	28299.9	281.135		422	-53604928	28299.9	281.135		422	72881984	28299.9	281.135		422	-101655680	28299.9	281.135		422	-58259200	28299.9	281.135		422	20976256	28299.9	281.135
	423	-117551808	28295	281.086		423	-67718080	28295	281.086		423	59509632	28295	281.086		423	-82735296	28295	281.086		423	-88450944	28295	281.086		423	-13344256	28295	281.086
	424	-150538752	28290	281.037		424	-86058176	28290	281.037		424	51371264	28290	281.037		424	-54101888	28290	281.037		424	-100314880	28290	281.037		424	-61253184	28290	281.037
	425	-163416768	28285	280.987		425	-106636288	28285	280.987		425	48991808	28285	280.987		425	-21025856	28285	280.987		425	-95861248	28285	280.987		425	-110324608	28285	280.987
	426	-152370048	28280.1	280.938		426	-124483008	28280.1	280.938		426	51214080	28280.1	280.938		426	10664000	28280.1	280.938		426	-80767488	28280.1	280.938		426	-147170048	28280.1	280.938
	427	-119550080	28275.1	280.889		427	-133244160	28275.1	280.889		427	55837376	28275.1	280.889		427	36465792	28275.1	280.889		427	-62568064	28275.1	280.889		427	-162468416	28275.1	280.889
	428	-72028800	28270.2	280.84		428	-127946368	28270.2	280.84		428	60735232	28270.2	280.84		428	54318272	28270.2	280.84		428	-48504448	28270.2	280.84		428	-154089856	28270.2	280.84
	429	-19617024	28265.2	280.79		429	-107671680	28265.2	280.79		429	64911232	28265.2	280.79		429	64618944	28265.2	280.79		429	-43680128	28265.2	280.79		429	-127164480	28265.2	280.79
	430	27580928	28260.2	280.741		430	-76775296	28260.2	280.741		430	68989568	28260.2	280.741		430	69294528	28260.2	280.741		430	-49965952	28260.2	280.741		430	-91348352	28260.2	280.741
	431	61187264	28255.3	280.692		431	-43876864	28255.3	280.692		431	74903872	28255.3	280.692		431	70453952	28255.3	280.692		431	-65828352	28255.3	280.692		431	-56727808	28255.3	280.692
	432	75821056	28250.3	280.642		432	-18874944	28250.3	280.642		432	84913536	28250.3	280.642		432	69275264	28250.3	280.642		432	-87002496	28250.3	280.642		432	-30235328	28250.3	280.642
	433	69608576	28245.4	280.593		433	-9198912	28245.4	280.593		433	100365248	28245.4	280.593		433	65612928	28245.4	280.593		433	-107777152	28245.4	280.593		433	-14010048	28245.4	280.593
	434	44076928	28240.4	280.544		434	-16943616	28240.4	280.544		434	120709440	28240.4	280.544		434	58439296	28240.4	280.544		434	-122573824	28240.4	280.544		434	-6084352	28240.4	280.544
	435	3572352	28235.4	280.494		435	-38184640	28235.4	280.494		435	143157696	28235.4	280.494		435	46837824	28235.4	280.494		435	-127467392	28235.4	280.494		435	-2677568	28235.4	280.494
	436	-45691200	28230.5	280.445		436	-64803776	28230.5	280.445		436	163109120	28230.5	280.445		436	31010560	28230.5	280.445		436	-121290624	28230.5	280.445		436	-749248	28230.5	280.445
	437	-96821888	28225.5	280.396		437	-87998208	28225.5	280.396		437	175200768	28225.5	280.396		437	12759936	28225.5	280.396		437	-106006784	28225.5	280.396		437	448128	28225.5	280.396
	438	-143452032	28220.5	280.347		438	-101867136	28220.5	280.347		438	174659008	28220.5	280.347		438	-4852736	28220.5	280.347		438	-86169728	28220.5	280.347		438	-607296	28220.5	280.347
	439	-180652736	28215.6	280.297		439	-105445312	28215.6	280.297		439	158582208	28215.6	280.297		439	-18591232	28215.6	280.297		439	-67525632	28215.6	280.297		439	-6404352	28215.6	280.297
	440	-205307136	28210.6	280.248		440	-102303936	28210.6	280.248		440	126841536	28210.6	280.248		440	-26443328	28210.6	280.248		440	-55106816	28210.6	280.248		440	-18714880	28210.6	280.248
	441	-215905408	28205.7	280.199		441	-98007296	28205.7	280.199		441	82398016	28205.7	280.199		441	-28737280	28205.7	280.199		441	-51423488	28205.7	280.199		441	-37486848	28205.7	280.199
	442	-212007808	28200.7	280.149		442	-96746048	28200.7	280.149		442	30939200	28200.7	280.149		442	-28453312	28200.7	280.149		442	-55427200	28200.7	280.149		442	-60820416	28200.7	280.149
	443	-193812416	28195.7	280.1		443	-98850752	28195.7	280.1		443	-20148992	28195.7	280.1		443	-30503488	28195.7	280.1		443	-62732928	28195.7	280.1		443	-85869312	28195.7	280.1
	444	-162199296	28190.8	280.051		444	-100445504	28190.8	280.051		444	-63341248	28190.8	280.051		444	-40151232	28190.8	280.051		444	-67168512	28190.8	280.051		444	-110019328	28190.8	280.051
	445	-119297152	28185.8	280.001		445	-95435520	28185.8	280.001		445	-92767616	28185.8	280.001		445	-61082496	28185.8	280.001		445	-63190016	28185.8	280.001		445	-131629824	28185.8	280.001
	446	-69187840	28180.8	279.952		446	-78859712	28180.8	279.952		446	-105797568	28180.8	279.952		446	-93802112	28180.8	279.952		446	-48304512	28180.8	279.952		446	-149978944	28180.8	279.952
	447	-18090560	28175.9	279.903		447	-49937472	28175.9	279.903		447	-103892032	28175.9	279.903		447	-134943680	28175.9	279.903		447	-24539264	28175.9	279.903		447	-164600576	28175.9	279.903
	448	26515456	28170.9	279.854		448	-13254080	28170.9	279.854		448	-92300416	28170.9	279.854		448	-177782848	28170.9	279.854		448	1713280	28170.9	279.854		448	-174591168	28170.9	279.854
	449	57861248	28166	279.804		449	22600704	28166	279.804		449	-78493120	28166	279.804		449	-213843136	28166	279.804		449	21555968	28166	279.804		449	-178482752	28166	279.804
	450	72295296	28161	279.755		450	48403584	28161	279.755		450	-69681216	28161	279.755		450	-235117824	28161	279.755		450	26564736	28161	279.755		450	-174910144	28161	279.755
	451	71003136	28156	279.706		451	58165248	28156	279.706		451	-70216256	28156	279.706		451	-236233664	28156	279.706		451	11830784	28156	279.706		451	-163768000	28156	279.706
	452	59983488	28151.1	279.656		452	51714816	28151.1	279.656		452	-79866624	28151.1	279.656		452	-215908032	28151.1	279.656		452	-22062464	28151.1	279.656		452	-147177536	28151.1	279.656
	453	47923392	28146.1	279.607		453	34786560	28146.1	279.607		453	-93774720	28146.1	279.607		453	-177289600	28146.1	279.607		453	-68876800	28146.1	279.607		453	-129586688	28146.1	279.607
	454	42654464	28141.1	279.558		454	16538560	28141.1	279.558		454	-104318400	28141.1	279.558		454	-127129408	28141.1	279.558		454	-118447104	28141.1	279.558		454	-116732992	28141.1	279.558
	455	47735360	28136.2	279.509		455	5598592	28136.2	279.509		455	-104316992	28136.2	279.509		455	-74079872	28136.2	279.509		455	-159677312	28136.2	279.509		455	-113786496	28136.2	279.509
	456	60880832	28131.2	279.459		456	6389952	28131.2	279.459		456	-90366976	28131.2	279.459		456	-26651136	28131.2	279.459		456	-183722624	28131.2	279.459		456	-123451264	28131.2	279.459
	457	75238080	28126.3	279.41		457	17339136	28126.3	279.41		457	-64887616	28126.3	279.41		457	8603520	28126.3	279.41		457	-186261376	28126.3	279.41		457	-144869312	28126.3	279.41
	458	83141248	28121.3	279.361		458	31696832	28121.3	279.361		458	-35854144	28121.3	279.361		458	28235776	28121.3	279.361		458	-168157568	28121.3	279.361		458	-173815232	28121.3	279.361
	459	80611328	28116.3	279.311		459	40538048	28116.3	279.311		459	-14093696	28116.3	279.311		459	32191936	28116.3	279.311		459	-134458240	28116.3	279.311		459	-204064128	28116.3	279.311
	460	70231680	28111.4	279.262		460	36578240	28111.4	279.262		460	-9069056	28111.4	279.262		460	23319424	28111.4	279.262		460	-92294400	28111.4	279.262		460	-229287360	28111.4	279.262
	461	60573248	28106.4	279.213		461	17168896	28106.4	279.213		461	-24811520	28106.4	279.213		461	6348864	28106.4	279.213		461	-48590976	28106.4	279.213		461	-244650880	28106.4	279.213
	462	61927104	28101.4	279.163		462	-14710400	28101.4	279.163		462	-57738944	28101.4	279.163		462	-13316928	28101.4	279.163		462	-8449024	28101.4	279.163		462	-247542912	28101.4	279.163
	463	80044928	28096.5	279.114		463	-51706816	28096.5	279.114		463	-97407616	28096.5	279.114		463	-30718336	28096.5	279.114		463	25330432	28096.5	279.114		463	-237375424	28096.5	279.114
	464	110908352	28091.5	279.065		464	-84879168	28091.5	279.065		464	-130067008	28091.5	279.065		464	-42178304	28091.5	279.065		464	51653120	28091.5	279.065		464	-214902208	28091.5	279.065
	465	139501504	28086.6	279.016		465	-106742656	28086.6	279.016		465	-143687232	28086.6	279.016		465	-45795136	28086.6	279.016		465	69996672	28086.6	279.016		465	-181677056	28086.6	279.016
	466	143990848	28081.6	278.966		466	-113368704	28081.6	278.966		466	-132461952	28081.6	278.966		466	-41591552	28081.6	278.966		466	79439360	28081.6	278.966		466	-140053504	28081.6	278.966
	467	104244416	28076.6	278.917		467	-104906368	28076.6	278.917		467	-98943424	28076.6	278.917		467	-31353984	28076.6	278.917		467	78412288	28076.6	278.917		467	-93642624	28076.6	278.917
	468	11371904	28071.7	278.868		468	-84661056	28071.7	278.868		468	-52931136	28071.7	278.868		468	-18198976	28071.7	278.868		468	65329152	28071.7	278.868		468	-47698048	28071.7	278.868
	469	-125940992	28066.7	278.818		469	-57435392	28066.7	278.818		469	-7571200	28066.7	278.818		469	-5921408	28066.7	278.818		469	39801728	28066.7	278.818		469	-8780992	28066.7	278.818
	470	-281533056	28061.8	278.769		470	-27980672	28061.8	278.769		470	25715712	28061.8	278.769		470	1783488	28061.8	278.769		470	3832704	28061.8	278.769		470	16609472	28061.8	278.769
	471	-418949696	28056.8	278.72		471	-118912	28056.8	278.72		471	41402304	28056.8	278.72		471	2080896	28056.8	278.72		471	-37653760	28056.8	278.72		471	24140032	28056.8	278.72
	472	-503297280	28051.8	278.671		472	23401600	28051.8	278.671		472	41476992	28051.8	278.671		472	-6434944	28051.8	278.671		472	-77335296	28051.8	278.671		472	13603136	28051.8	278.671
	473	-513207616	28046.9	278.621		473	40669376	28046.9	278.621		473	33999680	28046.9	278.621		473	-23509504	28046.9	278.621		473	-107033984	28046.9	278.621		473	-10311360	28046.9	278.621
	474	-448141184	28041.9	278.572		474	50453120	28041.9	278.572		474	29373952	28041.9	278.572		474	-47389120	28041.9	278.572		474	-119826176	28041.9	278.572		474	-39090752	28041.9	278.572
	475	-328137472	28036.9	278.523		475	52387456	28036.9	278.523		475	36024896	28036.9	278.523		475	-75299136	28036.9	278.523		475	-112012416	28036.9	278.523		475	-63158208	28036.9	278.523
	476	-186273152	28032	278.473		476	47396736	28032	278.473		476	57296640	28032	278.473		476	-104056384	28032	278.473		476	-84270080	28032	278.473		476	-75294464	28032	278.473
	477	-57090560	28027	278.424		477	37980032	28027	278.424		477	90716160	28027	278.424		477	-130598080	28027	278.424		477	-41581568	28027	278.424		477	-73253376	28027	278.424
	478	34240768	28022.1	278.375		478	27967488	28022.1	278.375		478	129644160	28022.1	278.375		478	-152280768	28022.1	278.375		478	8041472	28022.1	278.375		478	-60334976	28022.1	278.375
	479	77919488	28017.1	278.325		479	21627840	28017.1	278.325		479	166304768	28017.1	278.325		479	-166939776	28017.1	278.325		479	55624832	28017.1	278.325		479	-43550272	28017.1	278.325
	480	78969152	28012.1	278.276		480	22388352	28012.1	278.276		480	194701312	28012.1	278.276		480	-172841536	28012.1	278.276		480	93431680	28012.1	278.276		480	-30129280	28012.1	278.276
	481	51456896	28007.2	278.227		481	31707200	28007.2	278.227		481	212185728	28007.2	278.227		481	-168721728	28007.2	278.227		481	116654464	28007.2	278.227		481	-23951552	28007.2	278.227
	482	10896512	28002.2	278.178		482	48623616	28002.2	278.178		482	219255744	28002.2	278.178		482	-154039744	28002.2	278.178		482	124171392	28002.2	278.178		482	-23591744	28002.2	278.178
	483	-31435072	27997.2	278.128		483	70208960	27997.2	278.128		483	218078912	27997.2	278.128		483	-129419520	27997.2	278.128		483	118281728	27997.2	278.128		483	-22964992	27997.2	278.128
	484	-70076480	27992.3	278.079		484	92701632	27992.3	278.079		484	210812160	27992.3	278.079		484	-97062976	27992.3	278.079		484	103656576	27992.3	278.079		484	-14344832	27992.3	278.079
	485	-103142528	27987.3	278.03		485	112776448	27987.3	278.03		485	198735808	27987.3	278.03		485	-60831360	27987.3	278.03		485	85915776	27987.3	278.03		485	7631744	27987.3	278.03
	486	-128624640	27982.4	277.98		486	128361280	27982.4	277.98		486	182615488	27982.4	277.98		486	-25757440	27982.4	277.98		486	70261376	27982.4	277.98		486	42889728	27982.4	277.98
	487	-142169984	27977.4	277.931		487	138697408	27977.4	277.931		487	163901888	27977.4	277.931		487	3022656	27977.4	277.931		487	60451712	27977.4	277.931		487	85309184	27977.4	277.931
	488	-138102592	27972.4	277.882		488	143782848	27972.4	277.882		488	145819584	27972.4	277.882		488	21638720	27972.4	277.882		488	58220928	27972.4	277.882		488	124988928	27972.4	277.882
	489	-113225024	27967.5	277.832		489	143689856	27967.5	277.832		489	133402880	27967.5	277.832		489	28661120	27967.5	277.832		489	63097600	27967.5	277.832		489	152410688	27967.5	277.832
	490	-70939968	27962.5	277.783		490	138297280	27962.5	277.783		490	132106624	27962.5	277.783		490	25570368	27962.5	277.783		490	72542080	27962.5	277.783		490	162585216	27962.5	277.783
	491	-22641664	27957.5	277.734		491	127688128	27957.5	277.734		491	145463232	27957.5	277.734		491	16235264	27957.5	277.734		491	82360064	27957.5	277.734		491	157209920	27957.5	277.734
	492	15422784	27952.6	277.685		492	112982720	27952.6	277.685		492	172909760	27952.6	277.685		492	5502656	27952.6	277.685		492	87418112	27952.6	277.685		492	143754176	27952.6	277.685
	493	29114688	27947.6	277.635		493	97001280	27947.6	277.635		493	209003968	27947.6	277.635		493	-2603392	27947.6	277.635		493	82693632	27947.6	277.635		493	131829952	27947.6	277.635
	494	14046656	27942.7	277.586		494	84110528	27942.7	277.586		494	244692608	27942.7	277.586		494	-6366976	27942.7	277.586		494	64577536	27942.7	277.586		494	128507520	27942.7	277.586
	495	-20215296	27937.7	277.537		495	78982400	27937.7	277.537		495	270335936	27937.7	277.537		495	-6921984	27937.7	277.537		495	32173696	27937.7	277.537		495	134792256	27937.7	277.537
	496	-52334080	27932.7	277.487		496	84610944	27932.7	277.487		496	279295808	27932.7	277.487		496	-7593536	27932.7	277.487		496	-11833344	27932.7	277.487		496	144987072	27932.7	277.487
	497	-57775872	27927.8	277.438		497	100476928	27927.8	277.438		497	270525184	27927.8	277.438		497	-12278336	27927.8	277.438		497	-61194240	27927.8	277.438		497	149350784	27927.8	277.438
	498	-20472384	27922.8	277.389		498	121883264	27922.8	277.389		498	248957632	27922.8	277.389		498	-23532224	27922.8	277.389		498	-107249792	27922.8	277.389		498	138916992	27922.8	277.389
	499	57746368	27917.8	277.34		499	141081856	27917.8	277.34		499	223453760	27917.8	277.34		499	-41183680	27917.8	277.34		499	-141102080	27917.8	277.34		499	110282688	27917.8	277.34
	500	154815680	27912.9	277.29		500	150009472	27912.9	277.29		500	203164480	27912.9	277.29		500	-62099520	27912.9	277.29		500	-156226176	27912.9	277.29		500	68120576	27912.9	277.29
	501	235163200	27907.9	277.241		501	143607872	27907.9	277.241		501	193895168	27907.9	277.241		501	-81257472	27907.9	277.241		501	-150645120	27907.9	277.241		501	24144704	27907.9	277.241
	502	263352192	27903	277.192		502	122266496	27903	277.192		502	196049920	27903	277.192		502	-93735040	27903	277.192		502	-127800704	27903	277.192		502	-7157952	27903	277.192
	503	219080832	27898	277.142		503	92151616	27898	277.142		503	204994624	27898	277.142		503	-96821184	27898	277.142		503	-95634432	27898	277.142		503	-14255488	27898	277.142
	504	106949568	27893	277.093		504	63037056	27893	277.093		504	213556352	27893	277.093		504	-91390720	27893	277.093		504	-64041600	27893	277.093		504	6700608	27893	277.093
	505	-43613504	27888.1	277.044		505	44379648	27888.1	277.044		505	215412544	27888.1	277.044		505	-81950464	27888.1	277.044		505	-41526656	27888.1	277.044		505	50189824	27888.1	277.044
	506	-188690752	27883.1	276.994		506	41252416	27883.1	276.994		506	207771584	27883.1	276.994		506	-75285312	27883.1	276.994		506	-32284800	27883.1	276.994		506	103405760	27883.1	276.994
	507	-286370880	27878.1	276.945		507	51938880	27878.1	276.945		507	192169216	27878.1	276.945		507	-78167360	27878.1	276.945		507	-34851072	27878.1	276.945		507	151202944	27878.1	276.945
	508	-312509696	27873.2	276.896		508	68357824	27873.2	276.896		508	173171776	27873.2	276.896		508	-94944000	27873.2	276.896		508	-42899712	27873.2	276.896		508	181790976	27873.2	276.896
	509	-269132096	27868.2	276.847		509	79278464	27868.2	276.847		509	155807552	27868.2	276.847		509	-125856320	27868.2	276.847		509	-47937920	27868.2	276.847		509	190793472	27868.2	276.847
	510	-182073216	27863.3	276.797		510	75038272	27863.3	276.797		510	143125696	27863.3	276.797		510	-166665664	27863.3	276.797		510	-42860032	27863.3	276.797		510	182075712	27863.3	276.797
	511	-89176064	27858.3	276.748		511	51752704	27858.3	276.748		511	135128256	27858.3	276.748		511	-209698432	27858.3	276.748		511	-24960896	27858.3	276.748		511	165187520	27858.3	276.748
	512	-24413248	27853.3	276.699		512	13174848	27853.3	276.699		512	129539392	27853.3	276.699		512	-245945728	27853.3	276.699		512	2790656	27853.3	276.699		512	150729408	27853.3	276.699
	513	-4864320	27848.4	276.649		513	-30651904	27848.4	276.649		513	123863808	27848.4	276.649		513	-267535424	27848.4	276.649		513	32700672	27848.4	276.649		513	145761280	27848.4	276.649
	514	-25900480	27843.4	276.6		514	-67406464	27843.4	276.6		514	117485248	27843.4	276.6		514	-269817536	27843.4	276.6		514	55093504	27843.4	276.6		514	151215552	27843.4	276.6
	515	-66024128	27838.5	276.551		515	-87462976	27838.5	276.551		515	112524160	27838.5	276.551		515	-252475584	27838.5	276.551		515	61699328	27838.5	276.551		515	162254144	27838.5	276.551
	516	-98446784	27833.5	276.502		516	-87698176	27833.5	276.502		516	112842048	27833.5	276.502		516	-219400448	27833.5	276.502		516	48319360	27833.5	276.502		516	171131136	27833.5	276.502
	517	-103689280	27828.5	276.452		517	-72531712	27828.5	276.452		517	121604352	27828.5	276.452		517	-177438336	27828.5	276.452		517	15785216	27828.5	276.452		517	171025024	27828.5	276.452
	518	-77463296	27823.6	276.403		518	-51814656	27823.6	276.403		518	138663808	27823.6	276.403		518	-134431488	27823.6	276.403		518	-30977920	27823.6	276.403		518	158982016	27823.6	276.403
	519	-30714304	27818.6	276.354		519	-36556352	27818.6	276.354		519	159249408	27818.6	276.354		519	-97142848	27818.6	276.354		519	-85144448	27818.6	276.354		519	136670336	27818.6	276.354
	520	17398272	27813.6	276.304		520	-34384960	27813.6	276.304		520	174888768	27813.6	276.304		520	-69658880	27813.6	276.304		520	-140316800	27813.6	276.304		520	108786304	27813.6	276.304
	521	49557632	27808.7	276.255		521	-46690688	27808.7	276.255		521	176413952	27808.7	276.255		521	-52708160	27808.7	276.255		521	-191939968	27808.7	276.255		521	80110592	27808.7	276.255
	522	58241920	27803.7	276.206		522	-68593536	27803.7	276.206		522	157816896	27803.7	276.206		522	-44058560	27803.7	276.206		522	-237333248	27803.7	276.206		522	52840384	27803.7	276.206
	523	47883648	27798.8	276.156		523	-91606016	27798.8	276.156		523	119190208	27798.8	276.156		523	-39832960	27798.8	276.156		523	-274643200	27798.8	276.156		523	25619456	27798.8	276.156
	524	30691776	27793.8	276.107		524	-107691584	27793.8	276.107		524	67296704	27793.8	276.107		524	-36291712	27793.8	276.107		524	-301598336	27793.8	276.107		524	-5209344	27793.8	276.107
	525	18809664	27788.8	276.058		525	-112876800	27788.8	276.058		525	13346880	27788.8	276.058		525	-31471744	27788.8	276.058		525	-315018752	27788.8	276.058		525	-42771072	27788.8	276.058
	526	17171200	27783.9	276.009		526	-108864064	27783.9	276.009		526	-31155584	27783.9	276.009		526	-26100160	27783.9	276.009		526	-311582720	27783.9	276.009		526	-86728384	27783.9	276.009
	527	20820032	27778.9	275.959		527	-102044672	27778.9	275.959		527	-58717120	27778.9	275.959		527	-23436224	27778.9	275.959		527	-289581312	27778.9	275.959		527	-131859904	27778.9	275.959
	528	17970496	27773.9	275.91		528	-100472576	27773.9	275.91		528	-68420288	27773.9	275.91		528	-28066368	27773.9	275.91		528	-250740608	27773.9	275.91		528	-169067584	27773.9	275.91
	529	-2954944	27769	275.861		529	-110207232	27769	275.861		529	-65645248	27769	275.861		529	-44064896	27769	275.861		529	-200984064	27769	275.861		529	-188576640	27769	275.861
	530	-46118336	27764	275.811		530	-132612864	27764	275.811		530	-59138688	27764	275.811		530	-73185152	27764	275.811		530	-149421056	27764	275.811		530	-184001344	27764	275.811
	531	-104738624	27759.1	275.762		531	-163682816	27759.1	275.762		531	-56832896	27759.1	275.762		531	-113752192	27759.1	275.762		531	-105683072	27759.1	275.762		531	-155449664	27759.1	275.762
	532	-163166656	27754.1	275.713		532	-195522688	27754.1	275.713		532	-62365504	27754.1	275.713		532	-160677376	27754.1	275.713		532	-76601472	27754.1	275.713		532	-110188928	27754.1	275.713
	533	-203609536	27749.1	275.664		533	-219213184	27749.1	275.664		533	-73873216	27749.1	275.664		533	-206593344	27749.1	275.664		533	-63677952	27749.1	275.664		533	-60436352	27749.1	275.664
	534	-214201280	27744.2	275.614		534	-227785856	27744.2	275.614		534	-85517888	27744.2	275.614		534	-243695424	27744.2	275.614		534	-62575360	27744.2	275.614		534	-19110848	27744.2	275.614
	535	-194454464	27739.2	275.565		535	-218147968	27739.2	275.565		535	-90892288	27739.2	275.565		535	-265634496	27739.2	275.565		535	-65011584	27739.2	275.565		535	4704192	27739.2	275.565
	536	-155453632	27734.2	275.516		536	-191382528	27734.2	275.516		536	-86569024	27734.2	275.516		536	-268844608	27734.2	275.516		536	-62343040	27734.2	275.516		536	8705280	27734.2	275.516
	537	-114758912	27729.3	275.466		537	-151612928	27729.3	275.466		537	-74027328	27729.3	275.466		537	-252970240	27729.3	275.466		537	-49297920	27729.3	275.466		537	-2454656	27729.3	275.466
	538	-88556800	27724.3	275.417		538	-104188608	27724.3	275.417		538	-59020864	27724.3	275.417		538	-220444928	27724.3	275.417		538	-26166016	27724.3	275.417		538	-19706496	27724.3	275.417
	539	-84849344	27719.4	275.368		539	-54101440	27719.4	275.368		539	-48720960	27719.4	275.368		539	-175583680	27719.4	275.368		539	1598976	27719.4	275.368		539	-33592704	27719.4	275.368
	540	-100838464	27714.4	275.318		540	-5248896	27714.4	275.318		540	-48069632	27714.4	275.318		540	-123640640	27714.4	275.318		540	26251136	27714.4	275.318		540	-37963520	27714.4	275.318
	541	-125502400	27709.4	275.269		541	39374144	27709.4	275.269		541	-57159104	27709.4	275.269		541	-70135360	27709.4	275.269		541	41816576	27709.4	275.269		541	-31771840	27709.4	275.269
	542	-145787520	27704.5	275.22		542	76973184	27704.5	275.22		542	-70953600	27704.5	275.22		542	-20472832	27704.5	275.22		542	47461632	27704.5	275.22		542	-18362048	27704.5	275.22
	543	-153147712	27699.5	275.171		543	104383744	27699.5	275.171		543	-81520896	27699.5	275.171		543	20357056	27699.5	275.171		543	48522624	27699.5	275.171		543	-2847040	27699.5	275.171
	544	-147149120	27694.5	275.121		544	118143808	27694.5	275.121		544	-81717376	27694.5	275.121		544	48261312	27694.5	275.121		544	54573056	27694.5	275.121		544	10962304	27694.5	275.121
	545	-134486912	27689.6	275.072		545	115325888	27689.6	275.072		545	-68570496	27689.6	275.072		545	60797696	27689.6	275.072		545	75252224	27689.6	275.072		545	22482496	27689.6	275.072
	546	-124165312	27684.6	275.023		546	94808128	27684.6	275.023		546	-44747648	27684.6	275.023		546	57998016	27684.6	275.023		546	115639552	27684.6	275.023		546	34202880	27684.6	275.023
	547	-121549376	27679.7	274.973		547	58394112	27679.7	274.973		547	-17435584	27679.7	274.973		547	42833472	27679.7	274.973		547	173238400	27679.7	274.973		547	49622784	27679.7	274.973
	548	-124541760	27674.7	274.924		548	11209088	27674.7	274.924		548	4810432	27674.7	274.924		548	20895232	27674.7	274.924		548	237996032	27674.7	274.924		548	70454144	27674.7	274.924
	549	-124014912	27669.7	274.875		549	-38909824	27669.7	274.875		549	15730176	27669.7	274.875		549	-851136	27669.7	274.875		549	295487360	27669.7	274.875		549	94663168	27669.7	274.875
	550	-108433216	27664.8	274.825		550	-82909056	27664.8	274.825		550	13814976	27664.8	274.825		550	-15945600	27664.8	274.825		550	332019712	27664.8	274.825		550	116519104	27664.8	274.825
	551	-70420992	27659.8	274.776		551	-112437056	27659.8	274.776		551	2464512	27659.8	274.776		551	-20277696	27659.8	274.776		551	339574272	27659.8	274.776		551	128797056	27659.8	274.776
	552	-11963328	27654.8	274.727		552	-121582144	27654.8	274.727		552	-12105728	27654.8	274.727		552	-13138816	27654.8	274.727		552	318557696	27654.8	274.727		552	126160384	27654.8	274.727
	553	54523264	27649.9	274.678		553	-107938752	27649.9	274.678		553	-24075072	27649.9	274.678		553	2990016	27649.9	274.678		553	277281024	27649.9	274.678		553	108073664	27649.9	274.678
	554	110107072	27644.9	274.628		554	-72776384	27644.9	274.628		554	-30711744	27644.9	274.628		554	23831488	27644.9	274.628		554	228462592	27644.9	274.628		554	79733184	27644.9	274.628
	555	136744960	27640	274.579		555	-20408576	27640	274.579		555	-33238016	27640	274.579		555	45238784	27640	274.579		555	184299136	27640	274.579		555	50395712	27640	274.579
	556	124997056	27635	274.53		556	42923584	27635	274.53		556	-35520384	27635	274.53		556	64736640	27635	274.53		556	152178304	27635	274.53		556	29722112	27635	274.53
	557	78634880	27630	274.48		557	110271744	27630	274.48		557	-41352384	27630	274.48		557	81929024	27630	274.48		557	132752896	27630	274.48		557	23736768	27630	274.48
	558	14032768	27625.1	274.431		558	175013696	27625.1	274.431		558	-51815296	27625.1	274.431		558	97605888	27625.1	274.431		558	121008128	27625.1	274.431		558	32249024	27625.1	274.431
	559	-45536128	27620.1	274.382		559	231574336	27620.1	274.382		559	-64148544	27620.1	274.382		559	112075328	27620.1	274.382		559	109649408	27620.1	274.382		559	48954624	27620.1	274.382
	560	-78414720	27615.2	274.333		560	275867968	27615.2	274.333		560	-72786944	27615.2	274.333		560	123712320	27615.2	274.333		560	93175808	27615.2	274.333		560	64218624	27615.2	274.333
	561	-72463680	27610.2	274.283		561	305565504	27610.2	274.283		561	-72106624	27610.2	274.283		561	128670656	27610.2	274.283		561	70795904	27610.2	274.283		561	69307200	27610.2	274.283
	562	-29256000	27605.2	274.234		562	320272768	27605.2	274.234		562	-59525760	27605.2	274.234		562	122142592	27605.2	274.234		562	46941184	27605.2	274.234		562	60166336	27605.2	274.234
	563	36936640	27600.3	274.185		563	321608704	27600.3	274.185		563	-37383488	27600.3	274.185		563	100720064	27600.3	274.185		563	29228800	27600.3	274.185		563	39059840	27600.3	274.185
	564	104732288	27595.3	274.135		564	313084224	27595.3	274.135		564	-12575872	27595.3	274.135		564	64726336	27595.3	274.135		564	24850688	27595.3	274.135		564	13369664	27595.3	274.135
	565	153410752	27590.3	274.086		565	299645824	27590.3	274.086		565	6003904	27590.3	274.086		565	19237312	27590.3	274.086		565	37006208	27590.3	274.086		565	-7837248	27590.3	274.086
	566	169790016	27585.4	274.037		566	286807168	27585.4	274.037		566	11116736	27585.4	274.037		566	-26988352	27585.4	274.037		566	62928640	27585.4	274.037		566	-17877184	27585.4	274.037
	567	151707136	27580.4	273.987		567	279438400	27580.4	273.987		567	279232	27580.4	273.987		567	-64477952	27580.4	273.987		567	94331136	27580.4	273.987		567	-15320384	27580.4	273.987
	568	107122880	27575.5	273.938		568	280458368	27575.5	273.938		568	-23074368	27575.5	273.938		568	-86743296	27575.5	273.938		568	120075008	27575.5	273.938		568	-4443328	27575.5	273.938
	569	49651264	27570.5	273.889		569	289809984	27570.5	273.889		569	-50869952	27570.5	273.889		569	-93041920	27570.5	273.889		569	129965824	27570.5	273.889		569	6810112	27570.5	273.889
	570	-7366592	27565.5	273.84		570	304122304	27565.5	273.84		570	-73493952	27565.5	273.84		570	-88815744	27565.5	273.84		570	118189824	27565.5	273.84		570	10313216	27565.5	273.84
	571	-55744128	27560.6	273.79		571	317322048	27560.6	273.79		571	-83308160	27560.6	273.79		571	-83401408	27560.6	273.79		571	85128192	27560.6	273.79		571	1061120	27560.6	273.79
	572	-94414784	27555.6	273.741		572	322189952	27555.6	273.741		572	-77059584	27555.6	273.741		572	-85864768	27555.6	273.741		572	36984064	27555.6	273.741		572	-21117632	27555.6	273.741
	573	-127934208	27550.6	273.692		573	312515776	27550.6	273.692		573	-56264640	27550.6	273.692		573	-100754880	27550.6	273.692		573	-16472320	27550.6	273.692		573	-52016512	27550.6	273.692
	574	-162424000	27545.7	273.642		574	285232704	27545.7	273.642		574	-25640896	27545.7	273.642		574	-125725184	27545.7	273.642		574	-65081216	27545.7	273.642		574	-85211840	27545.7	273.642
	575	-200887360	27540.7	273.593		575	241809600	27540.7	273.593		575	9450752	27540.7	273.593		575	-152221056	27540.7	273.593		575	-101194240	27540.7	273.593		575	-114752640	27540.7	273.593
	576	-240051392	27535.8	273.544		576	188338560	27535.8	273.544		576	45219776	27535.8	273.544		576	-169081216	27535.8	273.544		576	-121353216	27535.8	273.544		576	-137122496	27535.8	273.544
	577	-270245760	27530.8	273.495		577	134143040	27530.8	273.495		577	80290048	27530.8	273.495		577	-167559040	27530.8	273.495		577	-126368640	27530.8	273.495		577	-151745984	27530.8	273.495
	578	-278577344	27525.8	273.445		578	89244928	27525.8	273.445		578	114940096	27525.8	273.445		578	-145560384	27525.8	273.445		578	-120050944	27525.8	273.445		578	-160137408	27525.8	273.445
	579	-254274368	27520.9	273.396		579	61469760	27520.9	273.396		579	149361408	27520.9	273.396		579	-109162880	27520.9	273.396		579	-107294848	27520.9	273.396		579	-164444480	27520.9	273.396
	580	-194085184	27515.9	273.347		580	54159616	27515.9	273.347		580	182041984	27515.9	273.347		580	-70637504	27515.9	273.347		580	-92330752	27515.9	273.347		580	-166316288	27515.9	273.347
	581	-105421184	27510.9	273.297		581	65301696	27510.9	273.297		581	209271360	27510.9	273.297		581	-43716672	27510.9	273.297		581	-77747968	27510.9	273.297		581	-166659200	27510.9	273.297
	582	-5662528	27506	273.248		582	88390848	27506	273.248		582	226126592	27506	273.248		582	-38073856	27506	273.248		582	-64483584	27506	273.248		582	-166200000	27506	273.248
	583	82534272	27501	273.199		583	114711168	27501	273.199		583	228492032	27501	273.199		583	-55338368	27501	273.199		583	-52551936	27501	273.199		583	-166234112	27501	273.199
	584	138477504	27496.1	273.149		584	136191680	27496.1	273.149		584	215097536	27496.1	273.149		584	-88321664	27496.1	273.149		584	-42028288	27496.1	273.149		584	-168820672	27496.1	273.149
	585	150615168	27491.1	273.1		585	147783744	27491.1	273.1		585	188524736	27491.1	273.1		585	-123759744	27491.1	273.1		585	-33760128	27491.1	273.1		585	-176056256	27491.1	273.1
	586	120829568	27486.1	273.051		586	148528768	27486.1	273.051		586	154633600	27486.1	273.051		586	-147407808	27486.1	273.051		586	-29469696	27486.1	273.051		586	-188690176	27486.1	273.051
	587	63967296	27481.2	273.002		587	141039232	27481.2	273.002		587	120635200	27481.2	273.002		587	-149387968	27481.2	273.002		587	-31207936	27481.2	273.002		587	-204868736	27481.2	273.002
	588	2504960	27476.2	272.952		588	129778048	27476.2	272.952		588	92690048	27476.2	272.952		588	-127673792	27476.2	272.952		588	-40411776	27476.2	272.952		588	-219875328	27476.2	272.952
	589	-41779904	27471.2	272.903		589	118991424	27471.2	272.903		589	74113216	27471.2	272.903		589	-88452672	27471.2	272.903		589	-56983424	27471.2	272.903		589	-227298944	27471.2	272.903
	590	-55934912	27466.3	272.854		590	111227840	27466.3	272.854		590	64934592	27466.3	272.854		590	-43433344	27466.3	272.854		590	-78805632	27466.3	272.854		590	-221321216	27466.3	272.854
	591	-40469696	27461.3	272.804		591	107025472	27461.3	272.804		591	62878144	27461.3	272.804		591	-5356416	27461.3	272.804		591	-101935616	27461.3	272.804		591	-199157248	27461.3	272.804
	592	-8521792	27456.4	272.755		592	105740672	27456.4	272.755		592	65139264	27456.4	272.755		592	16451392	27456.4	272.755		592	-121465856	27456.4	272.755		592	-162494976	27456.4	272.755
	593	20215744	27451.4	272.706		593	106916160	27451.4	272.706		593	70001920	27451.4	272.706		593	18850048	27451.4	272.706		593	-132794496	27451.4	272.706		593	-117176000	27451.4	272.706
	594	28345280	27446.4	272.656		594	111325888	27446.4	272.656		594	77496768	27446.4	272.656		594	5185216	27446.4	272.656		594	-132899712	27446.4	272.656		594	-71178112	27446.4	272.656
	595	8662080	27441.5	272.607		595	121018368	27441.5	272.607		595	88854912	27441.5	272.607		595	-16660416	27441.5	272.607		595	-121216000	27441.5	272.607		595	-31772352	27441.5	272.607
	596	-32328832	27436.5	272.558		596	138224960	27436.5	272.558		596	105162624	27436.5	272.558		596	-37453696	27436.5	272.558		596	-99846016	27436.5	272.558		596	-3131712	27436.5	272.558
	597	-76890368	27431.5	272.509		597	163636096	27431.5	272.509		597	126025984	27431.5	272.509		597	-49756800	27431.5	272.509		597	-73070080	27431.5	272.509		597	14573504	27431.5	272.509
	598	-103553408	27426.6	272.459		598	194960128	27426.6	272.459		598	149020864	27426.6	272.459		598	-50010048	27426.6	272.459		598	-46324352	27426.6	272.459		598	24306688	27426.6	272.459
	599	-96437376	27421.6	272.41		599	226643776	27421.6	272.41		599	170262080	27421.6	272.41		599	-39091840	27421.6	272.41		599	-24968704	27421.6	272.41		599	30111936	27421.6	272.41
	600	-52321152	27416.7	272.361		600	251143296	27416.7	272.361		600	185825216	27416.7	272.361		600	-21478464	27416.7	272.361		600	-13177216	27416.7	272.361		600	35017984	27416.7	272.361
	601	17671680	27411.7	272.311		601	261414912	27411.7	272.311		601	193307840	27411.7	272.311		601	-3500672	27411.7	272.311		601	-13200768	27411.7	272.311		601	39967488	27411.7	272.311
	602	92558848	27406.7	272.262		602	253670656	27406.7	272.262		602	192757120	27406.7	272.262		602	8702976	27406.7	272.262		602	-25102848	27406.7	272.262		602	44204032	27406.7	272.262
	603	150204992	27401.8	272.213		603	229234816	27401.8	272.213		603	186523264	27401.8	272.213		603	11024512	27401.8	272.213		603	-46935680	27401.8	272.213		603	46700480	27401.8	272.213
	604	176407744	27396.8	272.164		604	194643328	27396.8	272.164		604	178151488	27396.8	272.164		604	2651456	27396.8	272.164		604	-75237888	27396.8	272.164		604	47611136	27396.8	272.164
	605	170365760	27391.9	272.114		605	159832000	27391.9	272.114		605	170888128	27391.9	272.114		605	-13487488	27391.9	272.114		605	-105725952	27391.9	272.114		605	48729152	27391.9	272.114
	606	144170432	27386.9	272.065		606	135040704	27386.9	272.065		606	166530432	27386.9	272.065		606	-31248896	27386.9	272.065		606	-134072576	27386.9	272.065		606	52526976	27386.9	272.065
	607	116682752	27381.9	272.016		607	127577600	27381.9	272.016		607	165118976	27381.9	272.016		607	-42781312	27381.9	272.016		607	-156682880	27381.9	272.016		607	60239040	27381.9	272.016
	608	104681408	27377	271.966		608	139608704	27377	271.966		608	165505792	27377	271.966		608	-40778240	27377	271.966		608	-171368704	27377	271.966		608	70110528	27377	271.966
	609	115357312	27372	271.917		609	167684736	27372	271.917		609	166383872	27372	271.917		609	-20932864	27372	271.917		609	-177776768	27372	271.917		609	76998976	27372	271.917
	610	143526720	27367	271.868		610	204001728	27367	271.868		610	167169024	27367	271.868		610	16191296	27367	271.868		610	-177409664	27367	271.868		610	73891520	27367	271.868
	611	174689536	27362.1	271.818		611	238761024	27362.1	271.818		611	168273600	27362.1	271.818		611	64647744	27362.1	271.818		611	-173129344	27362.1	271.818		611	54891904	27362.1	271.818
	612	192329408	27357.1	271.769		612	262697024	27357.1	271.769		612	170695808	27357.1	271.769		612	114377408	27357.1	271.769		612	-168178048	27357.1	271.769		612	18366464	27357.1	271.769
	613	185923840	27352.2	271.72		613	268982976	27352.2	271.72		613	175245376	27352.2	271.72		613	154058496	27352.2	271.72		613	-164960512	27352.2	271.72		613	-31319680	27352.2	271.72
	614	155887744	27347.2	271.671		614	254158144	27347.2	271.671		614	181911488	27347.2	271.671		614	174659136	27347.2	271.671		614	-164000640	27347.2	271.671		614	-84495424	27347.2	271.671
	615	113211392	27342.2	271.621		615	218201920	27342.2	271.621		615	189759616	27342.2	271.621		615	172413824	27342.2	271.621		615	-163522176	27342.2	271.621		615	-129229248	27342.2	271.621
	616	74097600	27337.3	271.572		616	164147712	27337.3	271.572		616	197397888	27337.3	271.572		616	150049472	27337.3	271.572		616	-159942016	27337.3	271.572		616	-155519360	27337.3	271.572
	617	52255936	27332.3	271.523		617	97593984	27332.3	271.523		617	203696640	27332.3	271.523		617	115707136	27332.3	271.523		617	-149220096	27332.3	271.523		617	-158840832	27332.3	271.523
	618	52540544	27327.3	271.473		618	26197696	27327.3	271.473		618	208287616	27327.3	271.473		618	79925824	27327.3	271.473		618	-128623872	27327.3	271.473		618	-141519360	27327.3	271.473
	619	68890432	27322.4	271.424		619	-41042496	27322.4	271.424		619	211507584	27322.4	271.424		619	51866496	27322.4	271.424		619	-98206848	27322.4	271.424		619	-111396352	27322.4	271.424
	620	87419328	27317.4	271.375		620	-94987008	27317.4	271.375		620	213808704	27317.4	271.375		620	36289600	27317.4	271.375		620	-61313280	27317.4	271.375		620	-78481664	27317.4	271.375
	621	93053952	27312.5	271.326		621	-128099712	27312.5	271.326		621	215017024	27312.5	271.326		621	32479488	27312.5	271.326		621	-23765760	27312.5	271.326		621	-51160960	27312.5	271.326
	622	76506752	27307.5	271.276		622	-136397568	27307.5	271.276		622	213964160	27307.5	271.276		622	35464704	27307.5	271.276		622	8068864	27307.5	271.276		622	-33614336	27307.5	271.276
	623	38325056	27302.5	271.227		623	-120912896	27302.5	271.227		623	208836288	27302.5	271.227		623	38884032	27302.5	271.227		623	29607936	27302.5	271.227		623	-25395968	27302.5	271.227
	624	-11738560	27297.6	271.178		624	-87918080	27297.6	271.178		624	198167296	27297.6	271.178		624	38153984	27297.6	271.178		624	39787904	27297.6	271.178		624	-23011008	27297.6	271.178
	625	-59518208	27292.6	271.128		625	-47501376	27292.6	271.128		625	181973888	27292.6	271.128		625	32521280	27292.6	271.128		625	41381376	27292.6	271.128		625	-22390208	27292.6	271.128
	626	-92937664	27287.6	271.079		626	-10725696	27287.6	271.079		626	162355840	27287.6	271.079		626	25148480	27287.6	271.079		626	39632000	27287.6	271.079		626	-20873408	27287.6	271.079
	627	-107091840	27282.7	271.03		627	13748928	27282.7	271.03		627	143084416	27282.7	271.03		627	21316608	27282.7	271.03		627	39676160	27282.7	271.03		627	-17780032	27282.7	271.03
	628	-105608960	27277.7	270.98		628	22349760	27277.7	270.98		628	128212544	27277.7	270.98		628	25680640	27277.7	270.98		628	43821952	27277.7	270.98		628	-13571264	27277.7	270.98
	629	-97896640	27272.8	270.931		629	17525440	27272.8	270.931		629	120298560	27272.8	270.931		629	39895488	27272.8	270.931		629	49919104	27272.8	270.931		629	-8447680	27272.8	270.931
	630	-93864064	27267.8	270.882		630	6521344	27267.8	270.882		630	119132800	27267.8	270.882		630	61678656	27267.8	270.882		630	51684096	27267.8	270.882		630	-1512512	27267.8	270.882
	631	-98845824	27262.8	270.833		631	-1554496	27262.8	270.833		631	121703040	27262.8	270.833		631	85649728	27262.8	270.833		631	41045632	27262.8	270.833		631	8805760	27262.8	270.833
	632	-111206656	27257.9	270.783		632	773056	27257.9	270.783		632	123558784	27257.9	270.783		632	105450688	27257.9	270.783		632	11700608	27257.9	270.783		632	23258944	27257.9	270.783
	633	-123673792	27252.9	270.734		633	16646272	27252.9	270.734		633	121017984	27252.9	270.734		633	116115456	27252.9	270.734		633	-37534592	27252.9	270.734		633	40205184	27252.9	270.734
	634	-127566720	27247.9	270.685		634	43966400	27247.9	270.685		634	113158208	27247.9	270.685		634	115645184	27247.9	270.685		634	-101010688	27247.9	270.685		634	55179776	27247.9	270.685
	635	-117698688	27243	270.635		635	76505856	27243	270.635		635	102538560	27243	270.635		635	105233728	27243	270.635		635	-167023616	27243	270.635		635	62294400	27243	270.635
	636	-95468352	27238	270.586		636	106447808	27238	270.586		636	94153344	27238	270.586		636	88274752	27238	270.586		636	-220976384	27238	270.586		636	57106176	27238	270.586
	637	-68617024	27233.1	270.537		637	127245888	27233.1	270.537		637	92973056	27233.1	270.537		637	68826304	27233.1	270.537		637	-249864320	27233.1	270.537		637	39613952	27233.1	270.537
	638	-47778880	27228.1	270.488		638	135693952	27228.1	270.488		638	101177920	27228.1	270.488		638	50345536	27228.1	270.488		638	-246482688	27228.1	270.488		638	15697472	27228.1	270.488
	639	-41490816	27223.1	270.438		639	132560384	27223.1	270.438		639	116440832	27223.1	270.438		639	35204672	27223.1	270.438		639	-211839104	27223.1	270.438		639	-4109376	27223.1	270.438
	640	-52020992	27218.2	270.389		640	121804992	27218.2	270.389		640	132211072	27218.2	270.389		640	24975168	27218.2	270.389		640	-154937216	27218.2	270.389		640	-8361600	27218.2	270.389
	641	-73949312	27213.2	270.34		641	108950208	27213.2	270.34		641	140053504	27213.2	270.34		641	21019392	27213.2	270.34		641	-90064512	27213.2	270.34		641	10524096	27213.2	270.34
	642	-96136704	27208.3	270.29		642	99370240	27208.3	270.29		642	133110592	27208.3	270.29		642	24802816	27208.3	270.29		642	-32602112	27208.3	270.29		642	52646144	27208.3	270.29
	643	-106205376	27203.3	270.241		643	97074304	27203.3	270.241		643	109169664	27203.3	270.241		643	37586560	27203.3	270.241		643	5193728	27203.3	270.241		643	109965440	27203.3	270.241
	644	-95610880	27198.3	270.192		644	104161792	27198.3	270.192		644	71917632	27198.3	270.192		644	59609856	27198.3	270.192		644	17112448	27198.3	270.192		644	169132672	27198.3	270.192
	645	-63236864	27193.4	270.142		645	120767296	27193.4	270.142		645	29738368	27193.4	270.142		645	89260992	27193.4	270.142		645	3884928	27193.4	270.142		645	216656192	27193.4	270.142
	646	-16174912	27188.4	270.093		646	145196864	27188.4	270.093		646	-7496192	27188.4	270.093		646	122814656	27188.4	270.093		646	-27904384	27188.4	270.093		646	244108096	27188.4	270.093
	647	32449728	27183.4	270.044		647	174100480	27183.4	270.044		647	-32284672	27183.4	270.044		647	155051520	27183.4	270.044		647	-68219776	27183.4	270.044		647	250990208	27183.4	270.044
	648	67638720	27178.5	269.995		648	202785728	27178.5	269.995		648	-42343232	27178.5	269.995		648	180602560	27178.5	269.995		648	-106351104	27178.5	269.995		648	243974464	27178.5	269.995
	649	77111360	27173.5	269.945		649	225931584	27173.5	269.945		649	-41232640	27173.5	269.945		649	195454336	27173.5	269.945		649	-133251840	27173.5	269.945		649	232977600	27173.5	269.945
	650	54854336	27168.6	269.896		650	238847168	27168.6	269.896		650	-36544000	27168.6	269.896		650	197939392	27168.6	269.896		650	-142987520	27168.6	269.896		650	226056832	27168.6	269.896
	651	2730752	27163.6	269.847		651	239070656	27163.6	269.847		651	-36491072	27163.6	269.847		651	188790144	27163.6	269.847		651	-133259264	27163.6	269.847		651	225659392	27163.6	269.847
	652	-70021952	27158.6	269.797		652	227708032	27158.6	269.797		652	-46414848	27158.6	269.797		652	170318272	27158.6	269.797		652	-105216512	27158.6	269.797		652	228031680	27158.6	269.797
	653	-148999360	27153.7	269.748		653	209749184	27153.7	269.748		653	-66673536	27153.7	269.748		653	145224320	27153.7	269.748		653	-62837760	27153.7	269.748		653	225950592	27153.7	269.748
	654	-217854336	27148.7	269.699		654	192849664	27148.7	269.699		654	-92714176	27148.7	269.699		654	115705024	27148.7	269.699		654	-12056960	27148.7	269.699		654	213227392	27148.7	269.699
	655	-261818560	27143.7	269.649		655	184694400	27143.7	269.649		655	-117132032	27143.7	269.649		655	83306688	27143.7	269.649		655	40282496	27143.7	269.649		655	188515840	27143.7	269.649
	656	-270870592	27138.8	269.6		656	189801664	27138.8	269.6		656	-132697088	27138.8	269.6		656	49506432	27138.8	269.6		656	87591168	27138.8	269.6		656	156333056	27138.8	269.6
	657	-241973440	27133.8	269.551		657	207094912	27133.8	269.551		657	-135015744	27133.8	269.551		657	16540608	27133.8	269.551		657	124665728	27133.8	269.551		657	124677120	27133.8	269.551
	658	-179879360	27128.9	269.502		658	229471488	27128.9	269.502		658	-123795776	27128.9	269.502		658	-12183232	27128.9	269.502		658	148539264	27128.9	269.502		658	100458944	27128.9	269.502
	659	-96175168	27123.9	269.452		659	245875200	27123.9	269.452		659	-102400640	27123.9	269.452		659	-32548160	27123.9	269.452		659	158758400	27123.9	269.452		659	85193920	27123.9	269.452
	660	-6601344	27118.9	269.403		660	245308608	27118.9	269.403		660	-76144512	27118.9	269.403		660	-41024448	27118.9	269.403		660	156941952	27118.9	269.403		660	73371904	27118.9	269.403
	661	72801088	27114	269.354		661	221272576	27114	269.354		661	-50230016	27114	269.354		661	-36248064	27114	269.354		661	145732736	27114	269.354		661	54614848	27114	269.354
	662	129667904	27109	269.304		662	174762752	27109	269.304		662	-28210112	27109	269.304		662	-20079552	27109	269.304		662	127540864	27109	269.304		662	18792192	27109	269.304
	663	158153664	27104	269.255		663	114418752	27104	269.255		663	-11439744	27104	269.255		663	2480000	27104	269.255		663	103616128	27104	269.255		663	-38329088	27104	269.255
	664	159647808	27099.1	269.206		664	53557888	27099.1	269.206		664	565888	27099.1	269.206		664	24616128	27099.1	269.206		664	73886720	27099.1	269.206		664	-111737920	27099.1	269.206
	665	141103680	27094.1	269.157		665	5159168	27094.1	269.157		665	9329408	27094.1	269.157		665	39766336	27094.1	269.157		665	37672960	27094.1	269.157		665	-187962496	27094.1	269.157
	666	111656384	27089.2	269.107		666	-23198656	27089.2	269.107		666	16679872	27089.2	269.107		666	43551104	27089.2	269.107		666	-5032832	27089.2	269.107		666	-249854080	27089.2	269.107
	667	78930752	27084.2	269.058		667	-32346944	27084.2	269.058		667	24367168	27084.2	269.058		667	34761600	27084.2	269.058		667	-52339328	27084.2	269.058		667	-283295360	27084.2	269.058
	668	46592320	27079.2	269.009		668	-31199616	27079.2	269.009		668	33947648	27079.2	269.009		668	15069632	27079.2	269.009		668	-99930624	27079.2	269.009		668	-282787008	27079.2	269.009
	669	14143488	27074.3	268.959		669	-33187008	27074.3	268.959		669	46655808	27074.3	268.959		669	-12244288	27074.3	268.959		669	-141629696	27074.3	268.959		669	-253369728	27074.3	268.959
	670	-21069376	27069.3	268.91		670	-50899072	27069.3	268.91		670	63022720	27069.3	268.91		670	-43793920	27069.3	268.91		670	-170954752	27069.3	268.91		670	-208061376	27069.3	268.91
	671	-60733632	27064.3	268.861		671	-91106752	27064.3	268.861		671	82264960	27064.3	268.861		671	-77022016	27064.3	268.861		671	-183125248	27064.3	268.861		671	-162098368	27064.3	268.861
	672	-102990720	27059.4	268.811		672	-152123584	27059.4	268.811		672	101772672	27059.4	268.811		672	-110163264	27059.4	268.811		672	-176729984	27059.4	268.811		672	-126721664	27059.4	268.811
	673	-141838016	27054.4	268.762		673	-224436672	27054.4	268.762		673	117143552	27054.4	268.762		673	-141427328	27054.4	268.762		673	-154376576	27054.4	268.762		673	-105358080	27054.4	268.762
	674	-169001984	27049.5	268.713		674	-294171712	27049.5	268.713		674	123050560	27049.5	268.713		674	-168078592	27049.5	268.713		674	-122029696	27049.5	268.713		674	-93780864	27049.5	268.713
	675	-177542976	27044.5	268.664		675	-347851264	27044.5	268.664		675	114833920	27044.5	268.664		675	-186170688	27044.5	268.664		675	-87256064	27044.5	268.664		675	-83854976	27044.5	268.664
	676	-165520448	27039.5	268.614		676	-376535488	27039.5	268.614		676	90294592	27039.5	268.614		676	-191329664	27039.5	268.614		676	-57006336	27039.5	268.614		676	-68766400	27039.5	268.614
	677	-137878848	27034.6	268.565		677	-377898240	27034.6	268.565		677	50953152	27034.6	268.565		677	-180351872	27034.6	268.565		677	-35702016	27034.6	268.565		677	-47035456	27034.6	268.565
	678	-105430848	27029.6	268.516		678	-355812800	27029.6	268.516		678	2185216	27029.6	268.516		678	-152848640	27029.6	268.516		678	-24237696	27029.6	268.516		678	-23372544	27029.6	268.516
	679	-81095744	27024.6	268.466		679	-318090112	27024.6	268.466		679	-47924608	27024.6	268.466		679	-112027584	27024.6	268.466		679	-20139520	27024.6	268.466		679	-6120128	27024.6	268.466
	680	-74822656	27019.7	268.417		680	-273646272	27019.7	268.417		680	-90627584	27019.7	268.417		680	-64064000	27019.7	268.417		680	-18709120	27019.7	268.417		680	-2755264	27019.7	268.417
	681	-89302848	27014.7	268.368		681	-230328832	27014.7	268.368		681	-118714176	27014.7	268.368		681	-16204416	27014.7	268.368		681	-14704128	27014.7	268.368		681	-15838912	27014.7	268.368
	682	-118328064	27009.8	268.319		682	-194019904	27009.8	268.319		682	-128113024	27009.8	268.319		682	25585920	27009.8	268.319		682	-4019200	27009.8	268.319		682	-41460352	27009.8	268.319
	683	-148596352	27004.8	268.269		683	-168834752	27004.8	268.269		683	-118448448	27004.8	268.269		683	58350528	27004.8	268.269		683	15066880	27004.8	268.269		683	-70869312	27004.8	268.269
	684	-164360704	26999.8	268.22		684	-157671808	26999.8	268.22		684	-92600192	26999.8	268.22		684	82435456	26999.8	268.22		684	41328256	26999.8	268.22		684	-94346624	26999.8	268.22
	685	-153172992	26994.9	268.171		685	-162328832	26994.9	268.171		685	-55697088	26994.9	268.171		685	100259840	26994.9	268.171		685	70772480	26994.9	268.171		685	-105287552	26994.9	268.171
	686	-110569216	26989.9	268.121		686	-182850624	26989.9	268.121		686	-14071552	26989.9	268.121		686	114251264	26989.9	268.121		686	97503104	26989.9	268.121		686	-102482624	26989.9	268.121
	687	-42003520	26985	268.072		687	-216432576	26985	268.072		687	25507840	26985	268.072		687	125081536	26985	268.072		687	115099904	26985	268.072		687	-89623936	26985	268.072
	688	38571840	26980	268.023		688	-256679104	26980	268.023		688	56374144	26980	268.023		688	131186112	26980	268.023		688	118278656	26980	268.023		688	-72548864	26980	268.023
	689	112849664	26975	267.973		689	-294027648	26975	267.973		689	72577344	26975	267.973		689	129872512	26975	267.973		689	104479360	26975	267.973		689	-55863680	26975	267.973
	690	163514944	26970.1	267.924		690	-317658752	26970.1	267.924		690	69868416	26970.1	267.924		690	119446464	26970.1	267.924		690	74951680	26970.1	267.924		690	-40790208	26970.1	267.924
	691	179031040	26965.1	267.875		691	-318469952	26965.1	267.875		691	47020480	26965.1	267.875		691	101174656	26965.1	267.875		691	34923008	26965.1	267.875		691	-25290112	26965.1	267.875
	692	156481728	26960.1	267.826		692	-292068352	26960.1	267.826		692	7019712	26960.1	267.826		692	79892864	26960.1	267.826		692	-7394944	26960.1	267.826		692	-6203648	26960.1	267.826
	693	101864768	26955.2	267.776		693	-240569984	26955.2	267.776		693	-42602752	26955.2	267.776		693	62699200	26955.2	267.776		693	-42850048	26955.2	267.776		693	17974528	26955.2	267.776
	694	28047040	26950.2	267.727		694	-172382848	26950.2	267.727		694	-90909056	26950.2	267.727		694	56143680	26950.2	267.727		694	-63923712	26950.2	267.727		694	45366912	26950.2	267.727
	695	-48815424	26945.3	267.678		695	-99936640	26945.3	267.678		695	-126223872	26945.3	267.678		695	63157440	26945.3	267.678		695	-67020032	26945.3	267.678		695	71078656	26945.3	267.678
	696	-113344192	26940.3	267.628		696	-36140608	26940.3	267.628		696	-139662912	26940.3	267.628		696	81218688	26940.3	267.628		696	-53620224	26940.3	267.628		696	89487104	26940.3	267.628
	697	-154489728	26935.3	267.579		697	9159040	26935.3	267.579		697	-128267520	26935.3	267.579		697	102773888	26935.3	267.579		697	-29793536	26935.3	267.579		697	97170112	26935.3	267.579
	698	-167807040	26930.4	267.53		698	31505600	26930.4	267.53		698	-96414080	26930.4	267.53		698	117921344	26930.4	267.53		698	-4140160	26930.4	267.53		698	94798272	26930.4	267.53
	699	-156006336	26925.4	267.48		699	32273856	26925.4	267.48		699	-54706880	26925.4	267.48		699	118300800	26925.4	267.48		699	15131776	26925.4	267.48		699	86864384	26925.4	267.48
	700	-127693760	26920.4	267.431		700	17327744	26920.4	267.431		700	-16534912	26920.4	267.431		700	100527808	26920.4	267.431		700	22915200	26920.4	267.431		700	79313408	26920.4	267.431
	701	-94607680	26915.5	267.382		701	-5361728	26915.5	267.382		701	6529408	26915.5	267.382		701	67672320	26915.5	267.382		701	18668160	26915.5	267.382		701	76318848	26915.5	267.382
	702	-68053376	26910.5	267.333		702	-28140800	26910.5	267.333		702	8752832	26910.5	267.333		702	28137472	26910.5	267.333		702	6105344	26910.5	267.333		702	77974016	26910.5	267.333
	703	-55534080	26905.6	267.283		703	-45333312	26905.6	267.283		703	-7889728	26905.6	267.283		703	-7551296	26905.6	267.283		703	-8685824	26905.6	267.283		703	80228160	26905.6	267.283
	704	-58633536	26900.6	267.234		704	-53827520	26900.6	267.234		704	-34723264	26900.6	267.234		704	-30626176	26900.6	267.234		704	-19847936	26900.6	267.234		704	77215552	26900.6	267.234
	705	-72901120	26895.6	267.185		705	-52788544	26895.6	267.185		705	-59812416	26895.6	267.185		705	-36962368	26895.6	267.185		705	-23955712	26895.6	267.185		705	64820224	26895.6	267.185
	706	-89853120	26890.7	267.135		706	-42992640	26890.7	267.135		706	-72402560	26890.7	267.135		706	-27830144	26890.7	267.135		706	-20926336	26890.7	267.135		706	43589504	26890.7	267.135
	707	-100420160	26885.7	267.086		707	-26251584	26885.7	267.086		707	-66574464	26885.7	267.086		707	-8397056	26885.7	267.086		707	-13383936	26885.7	267.086		707	19358976	26885.7	267.086
	708	-98557376	26880.7	267.037		708	-5122752	26880.7	267.037		708	-42741632	26880.7	267.037		708	15115840	26880.7	267.037		708	-4943232	26880.7	267.037		708	1073536	26880.7	267.037
	709	-83588160	26875.8	266.988		709	17219328	26875.8	266.988		709	-6607936	26875.8	266.988		709	38173952	26875.8	266.988		709	1647872	26875.8	266.988		709	-3275904	26875.8	266.988
	710	-60307648	26870.8	266.938		710	37240704	26870.8	266.938		710	33710656	26870.8	266.938		710	59289536	26870.8	266.938		710	5571584	26870.8	266.938		710	9328064	26870.8	266.938
	711	-36777408	26865.9	266.889		711	51647936	26865.9	266.889		711	70985856	26865.9	266.889		711	79503040	26865.9	266.889		711	7737472	26865.9	266.889		711	34947136	26865.9	266.889
	712	-20731008	26860.9	266.84		712	58280000	26860.9	266.84		712	101163264	26860.9	266.84		712	100458112	26860.9	266.84		712	9541376	26860.9	266.84		712	63805824	26860.9	266.84
	713	-16131712	26855.9	266.79		713	56951104	26855.9	266.79		713	123829248	26855.9	266.79		713	122233152	26855.9	266.79		713	11355264	26855.9	266.79		713	84119232	26855.9	266.79
	714	-21374976	26851	266.741		714	49784384	26851	266.741		714	140983232	26851	266.741		714	142179008	26851	266.741		714	11675648	26851	266.741		714	86956288	26851	266.741
	715	-29903680	26846	266.692		715	40709824	26846	266.692		715	155024320	26846	266.692		715	155464320	26846	266.692		715	7495296	26846	266.692		715	69991744	26846	266.692
	716	-32933056	26841	266.642		716	34147008	26841	266.642		716	167122560	26841	266.642		716	157142336	26841	266.642		716	-4192768	26841	266.642		716	38534656	26841	266.642
	717	-23049216	26836.1	266.593		717	33289856	26836.1	266.593		717	176797888	26836.1	266.593		717	144766016	26836.1	266.593		717	-24486912	26836.1	266.593		717	3482048	26836.1	266.593
	718	2896960	26831.1	266.544		718	38656000	26831.1	266.544		718	182791104	26831.1	266.544		718	120262464	26831.1	266.544		718	-51271168	26831.1	266.544		718	-22804544	26831.1	266.544
	719	42792960	26826.2	266.495		719	47528000	26826.2	266.495		719	184570624	26826.2	266.495		719	90090688	26826.2	266.495		719	-79280512	26826.2	266.495		719	-30886528	26826.2	266.495
	720	90422592	26821.2	266.445		720	54593728	26821.2	266.445		720	183467328	26821.2	266.445		720	63467392	26821.2	266.445		720	-101665536	26821.2	266.445		720	-17153600	26821.2	266.445
	721	138044992	26816.2	266.396		721	53628864	26816.2	266.396		721	182631168	26816.2	266.396		721	49314432	26816.2	266.396		721	-112451328	26816.2	266.396		721	15668736	26816.2	266.396
	722	179077056	26811.3	266.347		722	39643136	26811.3	266.347		722	185643904	26811.3	266.347		722	53138624	26811.3	266.347		722	-108819968	26811.3	266.347		722	60204224	26811.3	266.347
	723	209676032	26806.3	266.297		723	10731584	26806.3	266.297		723	194377728	26806.3	266.297		723	75079360	26806.3	266.297		723	-92199168	26806.3	266.297		723	107244928	26806.3	266.297
	724	228724224	26801.3	266.248		724	-31024384	26801.3	266.248		724	207159680	26801.3	266.248		724	109853760	26801.3	266.248		724	-67668224	26801.3	266.248		724	148425600	26801.3	266.248
	725	236623488	26796.4	266.199		725	-79896384	26796.4	266.199		725	218264832	26796.4	266.199		725	148548352	26796.4	266.199		725	-41956736	26796.4	266.199		725	177882816	26796.4	266.199
	726	233914560	26791.4	266.15		726	-127938496	26791.4	266.15		726	219212736	26791.4	266.15		726	181495616	26791.4	266.15		726	-20932864	26791.4	266.15		726	192739456	26791.4	266.15
	727	220724416	26786.5	266.1		727	-166994816	26786.5	266.1		727	201544192	26786.5	266.1		727	201126272	26786.5	266.1		727	-7662080	26786.5	266.1		727	192836864	26786.5	266.1
	728	197432256	26781.5	266.051		728	-190632256	26781.5	266.051		728	160074944	26781.5	266.051		728	203811520	26781.5	266.051		728	-1787520	26781.5	266.051		728	180286464	26781.5	266.051
	729	166088768	26776.5	266.002		729	-195445248	26776.5	266.002		729	95362432	26776.5	266.002		729	190204736	26776.5	266.002		729	-324224	26776.5	266.002		729	159136704	26776.5	266.002
	730	131523264	26771.6	265.952		730	-181452800	26771.6	265.952		730	14392320	26771.6	265.952		730	164214400	26771.6	265.952		730	690944	26771.6	265.952		730	135015168	26771.6	265.952
	731	101100032	26766.6	265.903		731	-151637120	26766.6	265.903		731	-70840000	26766.6	265.903		731	131220224	26766.6	265.903		731	4574464	26766.6	265.903		731	114360192	26766.6	265.903
	732	82760128	26761.7	265.854		732	-110920064	26761.7	265.854		732	-146396352	26761.7	265.854		732	96319232	26761.7	265.854		732	13129344	26761.7	265.854		732	103002240	26761.7	265.854
	733	81975040	26756.7	265.804		733	-64972864	26756.7	265.804		733	-200081152	26756.7	265.804		733	63220928	26756.7	265.804		733	26765952	26756.7	265.804		733	104336192	26756.7	265.804
	734	98994240	26751.7	265.755		734	-19199552	26751.7	265.755		734	-224551936	26751.7	265.755		734	34036352	26751.7	265.755		734	45257984	26751.7	265.755		734	117813824	26751.7	265.755
	735	127846336	26746.8	265.706		735	21928960	26746.8	265.706		735	-218924352	26746.8	265.706		735	9794112	26746.8	265.706		735	68455552	26746.8	265.706		735	138636928	26746.8	265.706
	736	157851200	26741.8	265.657		736	55190656	26741.8	265.657		736	-188499584	26741.8	265.657		736	-8755776	26741.8	265.657		736	96373888	26741.8	265.657		736	159150656	26741.8	265.657
	737	177220096	26736.8	265.607		737	78705216	26736.8	265.607		737	-142848896	26736.8	265.607		737	-20538944	26736.8	265.607		737	128524800	26736.8	265.607		737	171661888	26736.8	265.607
	738	177267968	26731.9	265.558		738	91951616	26731.9	265.558		738	-92955712	26731.9	265.558		738	-24076928	26731.9	265.558		738	162915072	26731.9	265.558		738	171615744	26731.9	265.558
	739	155379264	26726.9	265.509		739	95796736	26726.9	265.509		739	-48307968	26726.9	265.509		739	-17976896	26726.9	265.509		739	195450112	26726.9	265.509		739	159722816	26726.9	265.509
	740	115404416	26722	265.459		740	92499776	26722	265.459		740	-14750080	26722	265.459		740	-1753600	26722	265.459		740	220385280	26722	265.459		740	141964416	26722	265.459
	741	65376768	26717	265.41		741	85564096	26717	265.41		741	6385664	26717	265.41		741	23415360	26717	265.41		741	231947776	26717	265.41		741	127331264	26717	265.41
	742	13737152	26712	265.361		742	79287936	26712	265.361		742	17742144	26712	265.361		742	54396928	26712	265.361		742	226602752	26712	265.361		742	124212160	26712	265.361
	743	-34028864	26707.1	265.312		743	77951168	26707.1	265.312		743	24258880	26707.1	265.312		743	86494208	26707.1	265.312		743	204975232	26707.1	265.312		743	137022720	26707.1	265.312
	744	-76685888	26702.1	265.262		744	84746560	26702.1	265.262		744	30926848	26702.1	265.262		744	114478400	26702.1	265.262		744	172451328	26702.1	265.262		744	164571776	26702.1	265.262
	745	-115925440	26697.1	265.213		745	100745728	26697.1	265.213		745	40707520	26697.1	265.213		745	133939136	26697.1	265.213		745	137988224	26697.1	265.213		745	200835392	26697.1	265.213
	746	-153288832	26692.2	265.164		746	124294528	26692.2	265.164		746	53306816	26692.2	265.164		746	142477504	26692.2	265.164		746	111441152	26692.2	265.164		746	237652608	26692.2	265.164
	747	-187170688	26687.2	265.114		747	151178688	26687.2	265.114		747	65236928	26687.2	265.114		747	140284992	26687.2	265.114		747	100407808	26687.2	265.114		747	267958592	26687.2	265.114
	748	-211756864	26682.3	265.065		748	175668992	26682.3	265.065		748	71177920	26682.3	265.065		748	129869888	26682.3	265.065		748	107834624	26682.3	265.065		748	287996928	26682.3	265.065
	749	-218750144	26677.3	265.016		749	192218304	26677.3	265.016		749	66176128	26677.3	265.016		749	115031104	26677.3	265.016		749	131324928	26677.3	265.016		749	297581696	26677.3	265.016
	750	-201224768	26672.3	264.966		750	197261184	26672.3	264.966		750	47861632	26672.3	264.966		750	99498176	26672.3	264.966		750	164343936	26672.3	264.966		750	298572288	26672.3	264.966
	751	-157695040	26667.4	264.917		751	190427136	26667.4	264.917		751	17793728	26667.4	264.917		751	85817728	26667.4	264.917		751	198716672	26667.4	264.917		751	292678208	26667.4	264.917
	752	-94173824	26662.4	264.868		752	174618240	26662.4	264.868		752	-18680896	26662.4	264.868		752	74965120	26662.4	264.868		752	227307136	26662.4	264.868		752	280021376	26662.4	264.868
	753	-22855104	26657.4	264.819		753	154807296	26657.4	264.819		753	-54108672	26657.4	264.819		753	66825600	26657.4	264.819		753	245798528	26657.4	264.819		753	259367424	26657.4	264.819
	754	42303104	26652.5	264.769		754	135945216	26652.5	264.769		754	-81560576	26652.5	264.769		754	61246976	26652.5	264.769		754	253019392	26652.5	264.769		754	229893248	26652.5	264.769
	755	91191488	26647.5	264.72		755	120800448	26647.5	264.72		755	-97185152	26647.5	264.72		755	59043712	26647.5	264.72		755	249989504	26647.5	264.72		755	193367040	26647.5	264.72
	756	121683584	26642.6	264.671		756	108669888	26642.6	264.671		756	-101619072	26642.6	264.671		756	62290432	26642.6	264.671		756	238443520	26642.6	264.671		756	155255296	26642.6	264.671
	757	140157760	26637.6	264.621		757	95608000	26637.6	264.621		757	-99622464	26637.6	264.621		757	73567808	26637.6	264.621		757	219725184	26637.6	264.621		757	123773504	26637.6	264.621
	758	157919360	26632.6	264.572		758	76201344	26632.6	264.572		758	-98038080	26632.6	264.572		758	94372992	26632.6	264.572		758	194615552	26632.6	264.572		758	107020096	26632.6	264.572
	759	185034560	26627.7	264.523		759	46223104	26627.7	264.523		759	-102894592	26627.7	264.523		759	123436480	26627.7	264.523		759	164047744	26627.7	264.523		759	109476288	26627.7	264.523
	760	224458560	26622.7	264.473		760	5043840	26622.7	264.473		760	-116862144	26622.7	264.473		760	155906112	26622.7	264.473		760	130112512	26622.7	264.473		760	129672832	26622.7	264.473
	761	269372288	26617.7	264.424		761	-43304704	26617.7	264.424		761	-138128576	26617.7	264.424		761	184096512	26617.7	264.424		761	96578048	26617.7	264.424		761	160380224	26617.7	264.424
	762	305256768	26612.8	264.375		762	-90994560	26612.8	264.375		762	-161149568	26612.8	264.375		762	199821568	26612.8	264.375		762	68404352	26612.8	264.375		762	191459840	26612.8	264.375
	763	316038848	26607.8	264.326		763	-128953664	26607.8	264.326		763	-178907328	26607.8	264.326		763	197516032	26607.8	264.326		763	50305024	26607.8	264.326		763	214129152	26607.8	264.326
	764	291656512	26602.9	264.276		764	-150098304	26602.9	264.276		764	-185664960	26602.9	264.276		764	176806976	26602.9	264.276		764	44970112	26602.9	264.276		764	224588608	26602.9	264.276
	765	233582464	26597.9	264.227		765	-151897600	26597.9	264.227		765	-179024768	26597.9	264.227		765	143237504	26597.9	264.227		765	51817856	26597.9	264.227		765	225188416	26597.9	264.227
	766	155621824	26592.9	264.178		766	-137172416	26592.9	264.178		766	-160468480	26592.9	264.178		766	106532480	26592.9	264.178		766	66935040	26592.9	264.178		766	222520000	26592.9	264.178
	767	79358656	26588	264.128		767	-112797312	26588	264.128		767	-134285376	26588	264.128		767	76884160	26588	264.128		767	84320256	26588	264.128		767	223390848	26588	264.128
	768	26024000	26583	264.079		768	-86898176	26583	264.079		768	-105537920	26583	264.079		768	60720768	26583	264.079		768	97913216	26583	264.079		768	230781184	26583	264.079
	769	8210240	26578.1	264.03		769	-65806400	26578.1	264.03		769	-78098496	26578.1	264.03		769	57826944	26578.1	264.03		769	103528320	26578.1	264.03		769	241942080	26578.1	264.03
	770	24983616	26573.1	263.981		770	-52110080	26573.1	263.981		770	-53664064	26573.1	263.981		770	61241152	26573.1	263.981		770	99873664	26573.1	263.981		770	249725568	26573.1	263.981
	771	62494784	26568.1	263.931		771	-44594560	26568.1	263.931		771	-32080448	26568.1	263.931		771	60191360	26568.1	263.931		771	88315776	26568.1	263.931		771	246540288	26568.1	263.931
	772	99807104	26563.2	263.882		772	-39943488	26563.2	263.882		772	-12610496	26563.2	263.882		772	44950528	26563.2	263.882		772	71656448	26563.2	263.882		772	228883264	26563.2	263.882
	773	117433472	26558.2	263.833		773	-35220736	26558.2	263.833		773	4692736	26558.2	263.833		773	11523968	26558.2	263.833		773	52650240	26558.2	263.833		773	199985984	26558.2	263.833
	774	104972992	26553.2	263.783		774	-29792768	26553.2	263.783		774	18347968	26553.2	263.783		774	-35972864	26553.2	263.783		774	33035648	26553.2	263.783		774	168989248	26553.2	263.783
	775	64740416	26548.3	263.734		775	-25662208	26548.3	263.734		775	25923200	26548.3	263.734		775	-86445632	26548.3	263.734		775	13495296	26548.3	263.734		775	146823936	26548.3	263.734
	776	10096576	26543.3	263.685		776	-26020864	26543.3	263.685		776	25353472	26543.3	263.685		776	-126110976	26543.3	263.685		776	-5595776	26543.3	263.685		776	140736768	26543.3	263.685
	777	-40524160	26538.4	263.635		777	-32780480	26538.4	263.635		777	16315200	26538.4	263.635		777	-144126656	26538.4	263.635		777	-23236608	26538.4	263.635		777	150236800	26538.4	263.635
	778	-71159680	26533.4	263.586		778	-44427392	26533.4	263.586		778	802816	26533.4	263.586		778	-137071296	26533.4	263.586		778	-37375488	26533.4	263.586		778	166674176	26533.4	263.586
	779	-74253440	26528.4	263.537		779	-55458816	26528.4	263.537		779	-17532288	26528.4	263.537		779	-110238208	26528.4	263.537		779	-45375744	26528.4	263.537		779	176921216	26528.4	263.537
	780	-52729152	26523.5	263.488		780	-57930496	26523.5	263.488		780	-35042432	26523.5	263.488		780	-75131648	26523.5	263.488		780	-45207040	26523.5	263.488		780	169556992	26523.5	263.488
	781	-17775872	26518.5	263.438		781	-44606912	26518.5	263.438		781	-49915840	26518.5	263.438		781	-44295040	26518.5	263.438		781	-36709760	26518.5	263.438		781	140601536	26518.5	263.438
	782	16252992	26513.5	263.389		782	-12375040	26513.5	263.389		782	-63184768	26513.5	263.389		782	-25843072	26513.5	263.389		782	-22163840	26513.5	263.389		782	95921408	26513.5	263.389
	783	37383616	26508.6	263.34		783	35641600	26508.6	263.34		783	-78274176	26508.6	263.34		783	-20219904	26508.6	263.34		783	-5696000	26508.6	263.34		783	48953344	26508.6	263.34
	784	39694592	26503.6	263.29		784	90314816	26503.6	263.29		784	-99181184	26503.6	263.29		784	-20662528	26503.6	263.29		784	8324480	26503.6	263.29		784	14647552	26503.6	263.29
	785	23926592	26498.7	263.241		785	139131648	26498.7	263.241		785	-128103104	26498.7	263.241		785	-17098496	26498.7	263.241		785	17168896	26498.7	263.241		785	2420096	26498.7	263.241
	786	-4661248	26493.7	263.192		786	170213248	26493.7	263.192		786	-163679872	26493.7	263.192		786	-1568640	26493.7	263.192		786	20945408	26493.7	263.192		786	11476160	26493.7	263.192
	787	-39722944	26488.7	263.143		787	176165504	26488.7	263.143		787	-200784768	26488.7	263.143		787	27461888	26488.7	263.143		787	22414208	26488.7	263.143		787	30814912	26488.7	263.143
	788	-76747200	26483.8	263.093		788	156323712	26483.8	263.093		788	-232089280	26483.8	263.093		788	64015872	26483.8	263.093		788	25392000	26483.8	263.093		788	44030912	26483.8	263.093
	789	-114224128	26478.8	263.044		789	116687872	26478.8	263.044		789	-250762368	26478.8	263.044		789	97290688	26478.8	263.044		789	32467840	26478.8	263.044		789	36749056	26478.8	263.044
	790	-152855552	26473.8	262.995		790	67813760	26473.8	262.995		790	-253096448	26473.8	262.995		790	116840320	26473.8	262.995		790	43178368	26473.8	262.995		790	3260672	26473.8	262.995
	791	-193603904	26468.9	262.945		791	21660736	26468.9	262.945		791	-239841600	26468.9	262.945		791	117739648	26468.9	262.945		791	53669376	26468.9	262.945		791	-50708544	26468.9	262.945
	792	-235823616	26463.9	262.896		792	-11396480	26463.9	262.896		792	-215618432	26463.9	262.896		792	103191424	26463.9	262.896		792	58198144	26463.9	262.896		792	-110351360	26463.9	262.896
	793	-276486784	26459	262.847		793	-24545216	26459	262.847		793	-186674944	26459	262.847		793	83241472	26459	262.847		793	51928704	26459	262.847		793	-158114880	26459	262.847
	794	-310798464	26454	262.797		794	-15287808	26454	262.797		794	-158029312	26454	262.797		794	70130688	26454	262.797		794	33757824	26454	262.797		794	-181063104	26454	262.797
	795	-333726848	26449	262.748		795	14697664	26449	262.748		795	-131323648	26449	262.748		795	72444672	26449	262.748		795	7764480	26449	262.748		795	-175913984	26449	262.748
	796	-341553984	26444.1	262.699		796	60090624	26444.1	262.699		796	-104368128	26444.1	262.699		796	90832256	26444.1	262.699		796	-17599360	26444.1	262.699		796	-149588224	26444.1	262.699
	797	-332671360	26439.1	262.65		797	112588800	26439.1	262.65		797	-72554432	26439.1	262.65		797	117356352	26439.1	262.65		797	-32468736	26439.1	262.65		797	-115264960	26439.1	262.65
	798	-307373824	26434.1	262.6		798	161827904	26434.1	262.6		798	-31446592	26434.1	262.6		798	138842304	26434.1	262.6		798	-29557888	26434.1	262.6		798	-86017408	26434.1	262.6
	799	-267014336	26429.2	262.551		799	196917056	26429.2	262.551		799	20664832	26429.2	262.551		799	142713472	26429.2	262.551		799	-7506560	26429.2	262.551		799	-69112384	26429.2	262.551
	800	-213217216	26424.2	262.502		800	208764288	26424.2	262.502		800	81406656	26424.2	262.502		800	122635712	26424.2	262.502		800	27930752	26424.2	262.502		800	-63567104	26424.2	262.502
	801	-147728512	26419.3	262.452		801	192825728	26419.3	262.452		801	144731776	26419.3	262.452		801	81386112	26419.3	262.452		801	65508224	26419.3	262.452		801	-61865792	26419.3	262.452
	802	-72999488	26414.3	262.403		802	151313216	26414.3	262.403		802	202840832	26414.3	262.403		802	29666240	26414.3	262.403		802	92407040	26414.3	262.403		802	-54711104	26414.3	262.403
	803	6953984	26409.3	262.354		803	93663104	26409.3	262.354		803	248708352	26409.3	262.354		803	-18536256	26409.3	262.354		803	98939392	26409.3	262.354		803	-36309248	26409.3	262.354
	804	86155968	26404.4	262.304		804	34478016	26404.4	262.304		804	278108800	26404.4	262.304		804	-51858432	26404.4	262.304		804	82169472	26404.4	262.304		804	-7584960	26404.4	262.304
	805	157306112	26399.4	262.255		805	-10856128	26399.4	262.255		805	290370496	26399.4	262.255		805	-66031936	26399.4	262.255		805	46993792	26399.4	262.255		805	24126656	26399.4	262.255
	806	213460032	26394.4	262.206		806	-31514688	26394.4	262.206		806	287737408	26394.4	262.206		806	-64944896	26394.4	262.206		806	4256000	26394.4	262.206		806	48585856	26394.4	262.206
	807	250123392	26389.5	262.157		807	-25441280	26389.5	262.157		807	273860544	26389.5	262.157		807	-57959936	26389.5	262.157		807	-33336832	26389.5	262.157		807	57509056	26389.5	262.157
	808	266756544	26384.5	262.107		808	-475776	26384.5	262.107		808	252263552	26384.5	262.107		808	-54900096	26384.5	262.107		808	-55867904	26384.5	262.107		808	48406400	26384.5	262.107
	809	266837568	26379.6	262.058		809	28427456	26379.6	262.058		809	225502208	26379.6	262.058		809	-61142208	26379.6	262.058		809	-59618304	26379.6	262.058		809	25644352	26379.6	262.058
	810	256261504	26374.6	262.009		810	45056320	26374.6	262.009		810	195269312	26374.6	262.009		810	-75120320	26374.6	262.009		810	-47974400	26374.6	262.009		810	-1597504	26374.6	262.009
	811	240684544	26369.6	261.959		811	38578688	26369.6	261.959		811	163155392	26369.6	261.959		811	-89324864	26369.6	261.959		811	-29600000	26369.6	261.959		811	-23334336	26369.6	261.959
	812	223027456	26364.7	261.91		812	8130112	26364.7	261.91		812	131438272	26364.7	261.91		812	-94207872	26364.7	261.91		812	-14724608	26364.7	261.91		812	-32793984	26364.7	261.91
	813	202396224	26359.7	261.861		813	-36749952	26359.7	261.861		813	103305920	26359.7	261.861		813	-83055360	26359.7	261.861		813	-11078400	26359.7	261.861		813	-28659712	26359.7	261.861
	814	175084480	26354.8	261.812		814	-80179072	26354.8	261.812		814	82264384	26354.8	261.812		814	-55492800	26354.8	261.812		814	-21062016	26354.8	261.812		814	-14744576	26354.8	261.812
	815	137333568	26349.8	261.762		815	-106822016	26349.8	261.762		815	70958144	26349.8	261.762		815	-17991936	26349.8	261.762		815	-41170048	26349.8	261.762		815	2439104	26349.8	261.762
	816	88606656	26344.8	261.713		816	-108590144	26344.8	261.713		816	69967360	26344.8	261.713		816	18816960	26344.8	261.713		816	-63766528	26344.8	261.713		816	16855040	26344.8	261.713
	817	33732800	26339.9	261.664		817	-88122880	26339.9	261.664		817	77192768	26339.9	261.664		817	44741376	26339.9	261.664		817	-80418432	26339.9	261.664		817	25352448	26339.9	261.664
	818	-17347520	26334.9	261.614		818	-57409856	26334.9	261.614		818	88176320	26334.9	261.614		818	54409984	26334.9	261.614		818	-85447296	26334.9	261.614		818	28379968	26334.9	261.614
	819	-52488128	26329.9	261.565		819	-32101376	26329.9	261.565		819	97290496	26329.9	261.565		819	49475584	26329.9	261.565		819	-78352896	26329.9	261.565		819	29004736	26329.9	261.565
	820	-61908928	26325	261.516		820	-24050240	26325	261.516		820	99357440	26325	261.516		820	37707328	26325	261.516		820	-64238336	26325	261.516		820	31019328	26325	261.516
	821	-42569152	26320	261.466		821	-35489216	26320	261.466		821	91114240	26320	261.466		821	29450624	26320	261.466		821	-52120832	26320	261.466		821	37191296	26320	261.466
	822	-371520	26315.1	261.417		822	-57557824	26315.1	261.417		822	72043264	26315.1	261.417		822	33063936	26315.1	261.417		822	-51757824	26315.1	261.417		822	48410624	26315.1	261.417
	823	50980800	26310.1	261.368		823	-73938816	26310.1	261.368		823	44371776	26310.1	261.368		823	51317504	26310.1	261.368		823	-70101504	26310.1	261.368		823	63878144	26310.1	261.368
	824	94297600	26305.1	261.319		824	-68044736	26305.1	261.319		824	12347136	26305.1	261.319		824	80231808	26305.1	261.319		824	-108584704	26305.1	261.319		824	81918336	26305.1	261.319
	825	114838848	26300.2	261.269		825	-30570624	26300.2	261.269		825	-18909888	26300.2	261.269		825	110737088	26300.2	261.269		825	-162135296	26300.2	261.269		825	100793920	26300.2	261.269
	826	105578880	26295.2	261.22		826	35948800	26295.2	261.22		826	-44631168	26295.2	261.22		826	132350784	26295.2	261.22		826	-220243840	26295.2	261.22		826	119090432	26295.2	261.22
	827	69695232	26290.2	261.171		827	117598976	26290.2	261.171		827	-61438016	26290.2	261.171		827	137305472	26290.2	261.171		827	-269765632	26290.2	261.171		827	135653184	26290.2	261.171
	828	19283392	26285.3	261.121		828	194346624	26285.3	261.121		828	-68026944	26285.3	261.121		828	123504064	26285.3	261.121		828	-298606592	26285.3	261.121		828	149389952	26285.3	261.121
	829	-29171328	26280.3	261.072		829	247794816	26280.3	261.072		829	-65410112	26280.3	261.072		829	95267776	26280.3	261.072		829	-299179136	26280.3	261.072		829	159311424	26280.3	261.072
	830	-60719616	26275.4	261.023		830	268103360	26275.4	261.023		830	-56654400	26275.4	261.023		830	61777536	26275.4	261.023		830	-270594432	26275.4	261.023		830	164930560	26275.4	261.023
	831	-66902720	26270.4	260.974		831	257236864	26270.4	260.974		831	-46106368	26270.4	260.974		831	33970368	26270.4	260.974		831	-218929280	26270.4	260.974		831	166794304	26270.4	260.974
	832	-47855296	26265.4	260.924		832	227409984	26265.4	260.924		832	-38200896	26265.4	260.924		832	21113280	26265.4	260.924		832	-155491712	26265.4	260.924		832	166708352	26265.4	260.924
	833	-10942080	26260.5	260.875		833	195707776	26260.5	260.875		833	-36120768	26260.5	260.875		833	28223168	26260.5	260.875		833	-93611264	26260.5	260.875		833	167324864	26260.5	260.875
	834	33202752	26255.5	260.826		834	177391808	26255.5	260.826		834	-40725568	26255.5	260.826		834	55035968	26255.5	260.826		834	-44937856	26255.5	260.826		834	171132224	26255.5	260.826
	835	75326464	26250.5	260.776		835	180722880	26250.5	260.776		835	-50193920	26250.5	260.776		835	96598720	26250.5	260.776		835	-16371968	26250.5	260.776		835	179309824	26250.5	260.776
	836	110837312	26245.6	260.727		836	205180032	26245.6	260.727		836	-60639488	26245.6	260.727		836	145027840	26245.6	260.727		836	-8553728	26245.6	260.727		836	191101248	26245.6	260.727
	837	140425344	26240.6	260.678		837	243283776	26240.6	260.678		837	-67590848	26240.6	260.678		837	191708288	26240.6	260.678		837	-16319360	26240.6	260.678		837	204163840	26240.6	260.678
	838	168039872	26235.7	260.628		838	284661056	26235.7	260.628		838	-67820096	26235.7	260.628		838	229241792	26235.7	260.628		838	-30892800	26235.7	260.628		838	215840832	26235.7	260.628
	839	197464000	26230.7	260.579		839	320239808	26230.7	260.579		839	-60757888	26230.7	260.579		839	252694080	26230.7	260.579		839	-43018880	26230.7	260.579		839	224740544	26230.7	260.579
	840	229302912	26225.7	260.53		840	344775168	26225.7	260.53		840	-48815552	26225.7	260.53		840	260013952	26225.7	260.53		840	-45955328	26225.7	260.53		840	231733376	26225.7	260.53
	841	259884416	26220.8	260.481		841	357025280	26220.8	260.481		841	-36364352	26220.8	260.481		841	251767040	26220.8	260.481		841	-37351296	26220.8	260.481		841	239680512	26220.8	260.481
	842	282550080	26215.8	260.431		842	358150976	26215.8	260.431		842	-27729344	26215.8	260.431		842	230481344	26215.8	260.431		842	-19474304	26215.8	260.431		842	251836928	26215.8	260.431
	843	290605824	26210.8	260.382		843	349688576	26210.8	260.382		843	-25070208	26210.8	260.382		843	199909760	26210.8	260.382		843	2129152	26210.8	260.382		843	269612736	26210.8	260.382
	844	280397440	26205.9	260.333		844	332391360	26205.9	260.333		844	-27158144	26205.9	260.333		844	164423488	26205.9	260.333		844	20900480	26205.9	260.333		844	290832768	26205.9	260.333
	845	252967168	26200.9	260.283		845	306487040	26200.9	260.283		845	-29715136	26200.9	260.283		845	128598208	26200.9	260.283		845	31540608	26200.9	260.283		845	309529280	26200.9	260.283
	846	213510080	26196	260.234		846	272935168	26196	260.234		846	-27275136	26196	260.234		846	96911040	26196	260.234		846	31463552	26196	260.234		846	317632128	26196	260.234
	847	168983552	26191	260.185		847	234640512	26191	260.185		847	-15780288	26191	260.185		847	73387520	26191	260.185		847	21015808	26191	260.185		847	307994816	26191	260.185
	848	125149184	26186	260.136		848	196622208	26186	260.136		848	5296064	26186	260.136		848	61063232	26186	260.136		848	2598400	26186	260.136		848	277470784	26186	260.136
	849	84565888	26181.1	260.086		849	164788800	26181.1	260.086		849	32363072	26181.1	260.086		849	61256064	26181.1	260.086		849	-20721664	26181.1	260.086		849	228618944	26181.1	260.086
	850	46497408	26176.1	260.037		850	143833856	26176.1	260.037		850	59038592	26176.1	260.037		850	72841600	26176.1	260.037		850	-46370048	26176.1	260.037		850	169168768	26176.1	260.037
	851	8636032	26171.1	259.988		851	135348480	26171.1	259.988		851	78854720	26171.1	259.988		851	91887104	26171.1	259.988		851	-72641408	26171.1	259.988		851	109384704	26171.1	259.988
	852	-30450176	26166.2	259.938		852	137204672	26166.2	259.938		852	88096960	26166.2	259.938		852	112028160	26166.2	259.938		852	-98194816	26166.2	259.938		852	58443264	26166.2	259.938
	853	-69637056	26161.2	259.889		853	144628992	26161.2	259.889		853	87396608	26161.2	259.889		853	125797504	26161.2	259.889		853	-121057024	26161.2	259.889		853	21409280	26161.2	259.889
	854	-105389120	26156.3	259.84		854	152498496	26156.3	259.84		854	81244800	26156.3	259.84		854	126750144	26156.3	259.84		854	-137823872	26156.3	259.84		854	-1873216	26156.3	259.84
	855	-133736640	26151.3	259.79		855	157733056	26151.3	259.79		855	75578304	26151.3	259.79		855	111813056	26151.3	259.79		855	-143708928	26151.3	259.79		855	-15557376	26151.3	259.79
	856	-152982336	26146.3	259.741		856	160593536	26146.3	259.741		856	74564800	26146.3	259.741		856	82999040	26146.3	259.741		856	-133708032	26146.3	259.741		856	-24903296	26146.3	259.741
	857	-165478528	26141.4	259.692		857	164248064	26141.4	259.692		857	78174848	26141.4	259.692		857	47655488	26141.4	259.692		857	-104581888	26141.4	259.692		857	-33153216	26141.4	259.692
	858	-177168704	26136.4	259.643		858	172854272	26136.4	259.643		858	81833536	26136.4	259.643		858	16831488	26136.4	259.643		858	-56869760	26136.4	259.643		858	-39672704	26136.4	259.643
	859	-194732416	26131.5	259.593		859	189151168	26131.5	259.593		859	78487808	26131.5	259.593		859	2031872	26131.5	259.593		859	4030592	26131.5	259.593		859	-40224384	26131.5	259.593
	860	-221543232	26126.5	259.544		860	212777216	26126.5	259.544		860	62244160	26126.5	259.544		860	11336704	26126.5	259.544		860	68434688	26126.5	259.544		860	-29206528	26126.5	259.544
	861	-254529216	26121.5	259.495		861	240128128	26121.5	259.495		861	31896960	26121.5	259.495		861	46268224	26121.5	259.495		861	124693120	26121.5	259.495		861	-2764800	26121.5	259.495
	862	-283867904	26116.6	259.445		862	265766336	26116.6	259.445		862	-7401600	26116.6	259.445		862	100668672	26116.6	259.445		862	162626944	26116.6	259.445		862	38703616	26116.6	259.445
	863	-296233024	26111.6	259.396		863	284622016	26111.6	259.396		863	-45306624	26111.6	259.396		863	162192768	26111.6	259.396		863	176874752	26111.6	259.396		863	89820608	26111.6	259.396
	864	-280554240	26106.6	259.347		864	293878592	26106.6	259.347		864	-69970560	26106.6	259.347		864	216038016	26106.6	259.347		864	168843648	26106.6	259.347		864	141603328	26106.6	259.347
	865	-233809664	26101.7	259.297		865	293674624	26101.7	259.297		865	-72754048	26101.7	259.297		865	249639168	26101.7	259.297		865	146377216	26101.7	259.297		865	184330752	26101.7	259.297
	866	-164009152	26096.7	259.248		866	286422528	26096.7	259.248		866	-51896384	26096.7	259.248		866	256623872	26096.7	259.248		866	121091200	26096.7	259.248		866	210670144	26096.7	259.248
	867	-88545856	26091.8	259.199		867	275261760	26091.8	259.199		867	-13473984	26091.8	259.199		867	238578432	26091.8	259.199		867	104252288	26091.8	259.199		867	217801088	26091.8	259.199
	868	-28108352	26086.8	259.15		868	262554112	26086.8	259.15		868	30859776	26086.8	259.15		868	204021760	26086.8	259.15		868	102714496	26086.8	259.15		868	207803712	26086.8	259.15
	869	1535552	26081.8	259.1		869	249194752	26081.8	259.1		869	68434432	26081.8	259.1		869	165090432	26081.8	259.1		869	116488192	26081.8	259.1		869	186357504	26081.8	259.1
	870	-3633024	26076.9	259.051		870	234967936	26076.9	259.051		870	90464448	26076.9	259.051		870	133315840	26076.9	259.051		870	138938752	26076.9	259.051		870	160473984	26076.9	259.051
	871	-33602880	26071.9	259.002		871	219548352	26071.9	259.002		871	95175424	26071.9	259.002		871	116162112	26071.9	259.002		871	159584640	26071.9	259.002		871	136250368	26071.9	259.002
	872	-67912384	26066.9	258.952		872	203392896	26066.9	258.952		872	87824320	26066.9	258.952		872	115565824	26066.9	258.952		872	168412416	26066.9	258.952		872	117445184	26066.9	258.952
	873	-83847360	26062	258.903		873	187887552	26062	258.903		873	77674688	26062	258.903		873	128785856	26062	258.903		873	159961472	26062	258.903		873	105176512	26062	258.903
	874	-65907392	26057	258.854		874	174620160	26057	258.854		874	73339264	26057	258.854		874	150863680	26057	258.854		874	135489664	26057	258.854		874	98530880	26057	258.854
	875	-12515072	26052.1	258.805		875	164233728	26052.1	258.805		875	78613504	26052.1	258.805		875	177366464	26052.1	258.805		875	102296192	26052.1	258.805		875	95566400	26052.1	258.805
	876	62938816	26047.1	258.755		876	155634048	26047.1	258.755		876	90666752	26047.1	258.755		876	206105344	26047.1	258.755		876	70462336	26047.1	258.755		876	94205312	26047.1	258.755
	877	137193728	26042.1	258.706		877	146167680	26042.1	258.706		877	101371136	26042.1	258.706		877	237145536	26042.1	258.706		877	48395264	26042.1	258.706		877	92745024	26042.1	258.706
	878	186182784	26037.2	258.657		878	132841728	26037.2	258.657		878	101124608	26037.2	258.657		878	271334656	26037.2	258.657		878	39109248	26037.2	258.657		878	90007552	26037.2	258.657
	879	194210944	26032.2	258.607		879	114017344	26032.2	258.607		879	83414784	26032.2	258.607		879	308317952	26032.2	258.607		879	38910464	26032.2	258.607		879	85310592	26032.2	258.607
	880	159452032	26027.2	258.558		880	90661952	26027.2	258.558		880	48068800	26027.2	258.558		880	345233088	26027.2	258.558		880	39131136	26027.2	258.558		880	78439424	26027.2	258.558
	881	93700864	26022.3	258.509		881	66398656	26022.3	258.509		881	1752448	26022.3	258.509		881	376890624	26022.3	258.509		881	30225536	26022.3	258.509		881	69664512	26022.3	258.509
	882	16898304	26017.3	258.459		882	46198976	26017.3	258.459		882	-44470016	26017.3	258.459		882	397454976	26017.3	258.459		882	6452992	26017.3	258.459		882	59726784	26017.3	258.459
	883	-50836928	26012.4	258.41		883	34299840	26012.4	258.41		883	-79406336	26012.4	258.41		883	402845632	26012.4	258.41		883	-30955520	26012.4	258.41		883	49694272	26012.4	258.41
	884	-96080128	26007.4	258.361		884	32388032	26007.4	258.361		884	-95950848	26007.4	258.361		884	392673984	26007.4	258.361		884	-73651072	26007.4	258.361		884	40688832	26007.4	258.361
	885	-115124544	26002.4	258.312		885	39001088	26002.4	258.312		885	-93436608	26002.4	258.312		885	370713536	26002.4	258.312		885	-109252224	26002.4	258.312		885	33615424	26002.4	258.312
	886	-112453376	25997.5	258.262		886	50478976	25997.5	258.262		886	-77188032	25997.5	258.262		886	343580032	25997.5	258.262		886	-126435072	25997.5	258.262		886	29080192	25997.5	258.262
	887	-96155008	25992.5	258.213		887	62964032	25992.5	258.213		887	-55588672	25992.5	258.213		887	318143360	25992.5	258.213		887	-119865600	25992.5	258.213		887	27596672	25992.5	258.213
	888	-73063296	25987.5	258.164		888	74354560	25987.5	258.164		888	-36054016	25987.5	258.164		888	298795456	25987.5	258.164		888	-92804096	25987.5	258.164		888	29983360	25987.5	258.164
	889	-46187264	25982.6	258.114		889	85106112	25982.6	258.114		889	-21725056	25982.6	258.114		889	285782720	25982.6	258.114		889	-56181504	25982.6	258.114		889	37677056	25982.6	258.114
	890	-15475968	25977.6	258.065		890	97377152	25977.6	258.065		890	-10324224	25977.6	258.065		890	275329088	25977.6	258.065		890	-24462848	25977.6	258.065		890	52649536	25977.6	258.065
	891	19012928	25972.7	258.016		891	112951808	25972.7	258.016		891	4377664	25972.7	258.016		891	261480832	25972.7	258.016		891	-10017792	25972.7	258.016		891	76786944	25972.7	258.016
	892	53845632	25967.7	257.967		892	131119744	25967.7	257.967		892	29188736	25967.7	257.967		892	238846720	25967.7	257.967		892	-18384512	25967.7	257.967		892	110896000	25967.7	257.967
	893	81203392	25962.7	257.917		893	147848896	25962.7	257.917		893	67735488	25962.7	257.917		893	205046208	25962.7	257.917		893	-46411136	25962.7	257.917		893	153783488	25962.7	257.917
	894	91195968	25957.8	257.868		894	156999104	25957.8	257.868		894	117975104	25957.8	257.868		894	161848448	25957.8	257.868		894	-83988864	25957.8	257.868		894	201931776	25957.8	257.868
	895	76620928	25952.8	257.819		895	153265024	25952.8	257.819		895	172072512	25952.8	257.819		895	114592448	25952.8	257.819		895	-118506880	25952.8	257.819		895	250085440	25952.8	257.819
	896	37740928	25947.8	257.769		896	135527744	25947.8	257.769		896	218724800	25947.8	257.769		896	70225088	25947.8	257.769		896	-139982848	25947.8	257.769		896	292649024	25947.8	257.769
	897	-15654464	25942.9	257.72		897	108881984	25942.9	257.72		897	247006272	25942.9	257.72		897	34845632	25942.9	257.72		897	-144601856	25942.9	257.72		897	325368064	25942.9	257.72
	898	-66478592	25937.9	257.671		898	84051712	25937.9	257.671		898	250206016	25937.9	257.671		898	11777152	25937.9	257.671		898	-135205376	25937.9	257.671		898	346563648	25937.9	257.671
	899	-96365824	25933	257.621		899	74057408	25933	257.621		899	228176832	25933	257.621		899	871360	25933	257.621		899	-118735744	25933	257.621		899	357340928	25933	257.621
	900	-93011264	25928	257.572		900	89323584	25928	257.572		900	187347584	25928	257.572		900	-822464	25928	257.572		900	-102063488	25928	257.572		900	360654080	25928	257.572
	901	-55513216	25923	257.523		901	133270592	25923	257.523		901	138490176	25923	257.523		901	2534848	25923	257.523		901	-88333184	25923	257.523		901	359659072	25923	257.523
	902	4848448	25918.1	257.474		902	200377600	25918.1	257.474		902	93184576	25918.1	257.474		902	7332160	25918.1	257.474		902	-75636224	25918.1	257.474		902	356153088	25918.1	257.474
	903	68948864	25913.1	257.424		903	277709760	25913.1	257.424		903	60355072	25913.1	257.424		903	11715712	25913.1	257.424		903	-58614400	25913.1	257.424		903	349872960	25913.1	257.424
	904	117470016	25908.2	257.375		904	349408576	25908.2	257.375		904	44111424	25908.2	257.375		904	15862976	25908.2	257.375		904	-32117760	25908.2	257.375		904	339006208	25908.2	257.375
	905	138528512	25903.2	257.326		905	402333824	25903.2	257.326		905	43522816	25903.2	257.326		905	21378240	25903.2	257.326		905	5003136	25903.2	257.326		905	321650432	25903.2	257.326
	906	131947136	25898.2	257.276		906	430521664	25898.2	257.276		906	54141952	25898.2	257.276		906	30220032	25898.2	257.276		906	47982720	25898.2	257.276		906	297452480	25898.2	257.276
	907	108392704	25893.3	257.227		907	436646336	25893.3	257.227		907	70437376	25893.3	257.227		907	43685056	25893.3	257.227		907	87210496	25893.3	257.227		907	268532224	25893.3	257.227
	908	83957824	25888.3	257.178		908	429989120	25888.3	257.178		908	88024192	25888.3	257.178		908	61856384	25888.3	257.178		908	111924992	25888.3	257.178		908	239128384	25888.3	257.178
	909	72799680	25883.3	257.128		909	421937088	25883.3	257.128		909	104807488	25883.3	257.128		909	83649088	25883.3	257.128		909	114856704	25883.3	257.128		909	214043648	25883.3	257.128
	910	81210944	25878.4	257.079		910	421052288	25878.4	257.079		910	120718464	25878.4	257.079		910	107310848	25878.4	257.079		910	95628416	25878.4	257.079		910	196595968	25878.4	257.079
	911	105670080	25873.4	257.03		911	429835008	25873.4	257.03		911	136393536	25873.4	257.03		911	131068736	25873.4	257.03		911	61262720	25873.4	257.03		911	187080256	25873.4	257.03
	912	135453760	25868.5	256.981		912	444441344	25868.5	256.981		912	151603072	25868.5	256.981		912	153611072	25868.5	256.981		912	23486592	25868.5	256.981		912	182549632	25868.5	256.981
	913	158261760	25863.5	256.931		913	457236800	25863.5	256.931		913	164305920	25863.5	256.931		913	174223616	25863.5	256.931		913	-5967616	25863.5	256.931		913	178113792	25863.5	256.931
	914	166030016	25858.5	256.882		914	460823360	25858.5	256.882		914	170865024	25858.5	256.882		914	192587584	25858.5	256.882		914	-19929600	25858.5	256.882		914	169219648	25858.5	256.882
	915	158245184	25853.6	256.833		915	451615296	25853.6	256.833		915	167369280	25853.6	256.833		915	208401408	25853.6	256.833		915	-18163584	25853.6	256.833		915	153881472	25853.6	256.833
	916	141473280	25848.6	256.783		916	431381632	25848.6	256.783		916	151453696	25848.6	256.783		916	221058112	25848.6	256.783		916	-6535424	25848.6	256.783		916	133814336	25848.6	256.783
	917	125717824	25843.6	256.734		917	406201856	25843.6	256.734		917	123730496	25843.6	256.734		917	229572352	25843.6	256.734		917	6516608	25843.6	256.734		917	113913920	25843.6	256.734
	918	119675712	25838.7	256.685		918	383490880	25838.7	256.685		918	88086976	25838.7	256.685		918	232835904	25838.7	256.685		918	14441216	25838.7	256.685		918	100282816	25838.7	256.685
	919	127276800	25833.7	256.636		919	368575936	25833.7	256.636		919	50603008	25833.7	256.636		919	230129280	25833.7	256.636		919	15810176	25833.7	256.636		919	97680320	25833.7	256.636
	920	147006016	25828.8	256.586		920	362406592	25828.8	256.586		920	17472576	25828.8	256.586		920	221687488	25828.8	256.586		920	14809600	25828.8	256.586		920	107537792	25828.8	256.586
	921	173945984	25823.8	256.537		921	361360896	25823.8	256.537		921	-7205312	25823.8	256.537		921	209053632	25823.8	256.537		921	18836224	25823.8	256.537		921	127422400	25823.8	256.537
	922	203087552	25818.8	256.488		922	359106944	25818.8	256.488		922	-22797760	25818.8	256.488		922	194981888	25818.8	256.488		922	34435840	25818.8	256.488		922	152165056	25818.8	256.488
	923	231935616	25813.9	256.438		923	349571712	25813.9	256.438		923	-32039488	25813.9	256.438		923	182791808	25813.9	256.438		923	63606784	25813.9	256.438		923	176111872	25813.9	256.438
	924	261011008	25808.9	256.389		924	329653696	25808.9	256.389		924	-39467904	25808.9	256.389		924	175279808	25808.9	256.389		924	102265600	25808.9	256.389		924	195458944	25808.9	256.389
	925	292137472	25803.9	256.34		925	300530112	25803.9	256.34		925	-49048256	25803.9	256.34		925	173515264	25803.9	256.34		925	141609856	25803.9	256.34		925	209608192	25803.9	256.34
	926	325691328	25799	256.29		926	267103488	25799	256.29		926	-62026368	25799	256.29		926	175987200	25799	256.29		926	171702272	25799	256.29		926	220940992	25799	256.29
	927	358577728	25794	256.241		927	235954688	25794	256.241		927	-75970112	25794	256.241		927	178548800	25794	256.241		927	185573376	25794	256.241		927	233125376	25794	256.241
	928	384282816	25789.1	256.192		928	212758144	25789.1	256.192		928	-85458688	25789.1	256.192		928	175390208	25789.1	256.192		928	181948160	25789.1	256.192		928	248732544	25789.1	256.192
	929	395185792	25784.1	256.143		929	200249344	25784.1	256.143		929	-84160128	25784.1	256.143		929	160908800	25784.1	256.143		929	165417088	25784.1	256.143		929	267252992	25784.1	256.143
	930	386033984	25779.1	256.093		930	197505600	25779.1	256.093		930	-67431872	25779.1	256.093		930	131949376	25779.1	256.093		930	144126720	25779.1	256.093		930	284446720	25779.1	256.093
	931	356784128	25774.2	256.044		931	200710464	25774.2	256.044		931	-34346816	25774.2	256.044		931	89629376	25774.2	256.044		931	126211840	25774.2	256.044		931	293415808	25774.2	256.044
	932	313270336	25769.2	255.995		932	204977216	25769.2	255.995		932	11702656	25769.2	255.995		932	39978880	25769.2	255.995		932	116690816	25769.2	255.995		932	287083456	25769.2	255.995
	933	265236032	25764.2	255.945		933	206444480	25764.2	255.945		933	64050368	25764.2	255.945		933	-7043968	25764.2	255.945		933	116190336	25764.2	255.945		933	261181696	25764.2	255.945
	934	222598848	25759.3	255.896		934	203827968	25759.3	255.896		934	114978176	25759.3	255.896		934	-40045760	25759.3	255.896		934	121865216	25759.3	255.896		934	216616448	25759.3	255.896
	935	191715392	25754.3	255.847		935	198879232	25754.3	255.847		935	158161216	25754.3	255.847		935	-49496448	25754.3	255.847		935	129766784	25754.3	255.847		935	160257536	25754.3	255.847
	936	173408128	25749.4	255.798		936	195633984	25749.4	255.798		936	190340224	25749.4	255.798		936	-30757312	25749.4	255.798		936	137260416	25749.4	255.798		936	103729472	25749.4	255.798
	937	163633152	25744.4	255.748		937	198765312	25744.4	255.748		937	211616768	25744.4	255.748		937	14225728	25744.4	255.748		937	144180736	25744.4	255.748		937	60459328	25744.4	255.748
	938	156356224	25739.4	255.699		938	211661376	25739.4	255.699		938	224405504	25739.4	255.699		938	77211776	25739.4	255.699		938	152195840	25739.4	255.699		938	41838080	25739.4	255.699
	939	147145984	25734.5	255.65		939	234936192	25734.5	255.65		939	231655232	25734.5	255.65		939	145895552	25734.5	255.65		939	162856704	25734.5	255.65		939	53687104	25734.5	255.65
	940	135706240	25729.5	255.6		940	265943104	25729.5	255.6		940	235221120	25729.5	255.6		940	207351424	25729.5	255.6		940	175541376	25729.5	255.6		940	94175424	25729.5	255.6
	941	126172032	25724.6	255.551		941	299530304	25724.6	255.551		941	235117696	25724.6	255.551		941	251534016	25724.6	255.551		941	186563712	25724.6	255.551		941	153916800	25724.6	255.551
	942	125147136	25719.6	255.502		942	329834624	25719.6	255.502		942	229908672	25719.6	255.502		942	273693760	25719.6	255.502		942	190094976	25719.6	255.502		942	218311104	25719.6	255.502
	943	138560064	25714.6	255.452		943	352499392	25714.6	255.452		943	217935040	25714.6	255.452		943	274996032	25714.6	255.452		943	180578560	25714.6	255.452		943	271481536	25714.6	255.452
	944	168912448	25709.7	255.403		944	366459328	25709.7	255.403		944	198706112	25709.7	255.403		944	261311104	25709.7	255.403		944	155501568	25709.7	255.403		944	300622720	25709.7	255.403
	945	214176640	25704.7	255.354		945	374498176	25704.7	255.354		945	173741888	25704.7	255.354		945	240780864	25704.7	255.354		945	117145088	25704.7	255.354		945	299414144	25704.7	255.354
	946	268683904	25699.7	255.305		946	382176384	25699.7	255.305		946	146459328	25699.7	255.305		946	221129856	25699.7	255.305		946	72389888	25699.7	255.305		946	269440448	25699.7	255.305
	947	325335744	25694.8	255.255		947	395362304	25694.8	255.255		947	121154240	25694.8	255.255		947	207650176	25694.8	255.255		947	30567936	25694.8	255.255		947	219218112	25694.8	255.255
	948	377909824	25689.8	255.206		948	417243520	25689.8	255.206		948	101544128	25689.8	255.206		948	202403712	25689.8	255.206		948	268288	25689.8	255.206		948	161247808	25689.8	255.206
	949	422355264	25684.9	255.157		949	446065664	25684.9	255.157		949	89496896	25684.9	255.157		949	204649408	25684.9	255.157		949	-13522432	25684.9	255.157		949	108174336	25684.9	255.157
	950	456679168	25679.9	255.107		950	474732224	25679.9	255.107		950	84446976	25679.9	255.107		950	212045248	25679.9	255.107		950	-10755840	25679.9	255.107		950	69403584	25679.9	255.107
	951	479869312	25674.9	255.058		951	492751360	25674.9	255.058		951	83679872	25674.9	255.058		951	221975488	25674.9	255.058		951	4319744	25674.9	255.058		951	49258176	25674.9	255.058
	952	490806784	25670	255.009		952	490056512	25670	255.009		952	83311104	25670	255.009		952	232450816	25670	255.009		952	25323904	25670	255.009		952	47079232	25670	255.009
	953	488023424	25665	254.96		953	461331264	25665	254.96		953	79571776	25665	254.96		953	242345728	25665	254.96		953	46350208	25665	254.96		953	58873920	25665	254.96
	954	470536832	25660	254.91		954	409059968	25660	254.91		954	69986048	25660	254.91		954	251089600	25660	254.91		954	63850368	25660	254.91		954	79529344	25660	254.91
	955	439232512	25655.1	254.861		955	343848704	25655.1	254.861		955	54154816	25655.1	254.861		955	258170880	25655.1	254.861		955	77107328	25655.1	254.861		955	104520000	25655.1	254.861
	956	397816640	25650.1	254.812		956	281565056	25650.1	254.812		956	34036928	25650.1	254.812		956	262839680	25650.1	254.812		956	87343104	25650.1	254.812		956	130462400	25650.1	254.812
	957	352508608	25645.2	254.762		957	238144192	25645.2	254.762		957	13734080	25645.2	254.762		957	264237568	25645.2	254.762		957	96149120	25645.2	254.762		957	154593856	25645.2	254.762
	958	310316544	25640.2	254.713		958	223955392	25640.2	254.713		958	-1180928	25640.2	254.713		958	261926272	25640.2	254.713		958	104141056	25640.2	254.713		958	173889344	25640.2	254.713
	959	276573312	25635.2	254.664		959	239934592	25635.2	254.664		959	-4760064	25635.2	254.664		959	256565056	25635.2	254.664		959	110495744	25635.2	254.664		959	184742208	25635.2	254.664
	960	252926144	25630.3	254.614		960	277074240	25630.3	254.614		960	7875904	25630.3	254.614		960	250385792	25630.3	254.614		960	113481984	25630.3	254.614		960	183778240	25630.3	254.614
	961	236866176	25625.3	254.565		961	319538560	25625.3	254.565		961	38952960	25625.3	254.565		961	247172608	25625.3	254.565		961	111562496	25625.3	254.565		961	169623104	25625.3	254.565
	962	223164288	25620.3	254.516		962	350205888	25620.3	254.516		962	86720448	25620.3	254.516		962	251629824	25620.3	254.516		962	104401408	25620.3	254.516		962	144699264	25620.3	254.516
	963	206621312	25615.4	254.467		963	356452416	25615.4	254.467		963	144915840	25615.4	254.467		963	268243200	25615.4	254.467		963	93242240	25615.4	254.467		963	115832192	25615.4	254.467
	964	184832256	25610.4	254.417		964	333938496	25610.4	254.417		964	203473216	25610.4	254.417		964	299937216	25610.4	254.417		964	80508416	25610.4	254.417		964	92825792	25610.4	254.417
	965	159599936	25605.5	254.368		965	287060352	25605.5	254.368		965	250598976	25605.5	254.368		965	346926848	25605.5	254.368		965	68897792	25605.5	254.368		965	85126336	25605.5	254.368
	966	136263296	25600.5	254.319		966	226182784	25600.5	254.319		966	275822464	25600.5	254.319		966	406153856	25600.5	254.319		966	60448256	25600.5	254.319		966	97771584	25600.5	254.319
	967	121228480	25595.5	254.269		967	163109824	25595.5	254.269		967	273137856	25595.5	254.269		967	471563968	25595.5	254.269		967	55980416	25595.5	254.269		967	128462272	25595.5	254.269
	968	118883712	25590.6	254.22		968	106884544	25590.6	254.22		968	243123648	25590.6	254.22		968	535260224	25590.6	254.22		968	55051904	25590.6	254.22		968	167383168	25590.6	254.22
	969	129396480	25585.6	254.171		969	61660288	25585.6	254.171		969	193145600	25585.6	254.171		969	589308480	25585.6	254.171		969	56278912	25585.6	254.171		969	200323904	25585.6	254.171
	970	148466688	25580.6	254.121		970	27261056	25580.6	254.121		970	135373504	25580.6	254.121		970	627737920	25580.6	254.121		970	57760768	25580.6	254.121		970	214144704	25580.6	254.121
	971	169160320	25575.7	254.072		971	1700096	25575.7	254.072		971	83169856	25575.7	254.072		971	648152064	25575.7	254.072		971	57436160	25575.7	254.072		971	202398336	25575.7	254.072
	972	184950592	25570.7	254.023		972	-15977024	25570.7	254.023		972	47084928	25570.7	254.023		972	652415680	25570.7	254.023		972	53387136	25570.7	254.023		972	168596288	25570.7	254.023
	973	192539904	25565.8	253.974		973	-24202560	25565.8	253.974		973	31902848	25565.8	253.974		973	646119424	25565.8	253.974		973	44242432	25565.8	253.974		973	125448576	25565.8	253.974
	974	193185408	25560.8	253.924		974	-19600320	25560.8	253.924		974	35806912	25560.8	253.924		974	636907648	25560.8	253.924		974	29766016	25560.8	253.924		974	90109504	25560.8	253.924
	975	192001024	25555.8	253.875		975	497280	25555.8	253.875		975	51896384	25555.8	253.875		975	632159424	25555.8	253.875		975	11493632	25555.8	253.875		975	77281984	25555.8	253.875
	976	195662976	25550.9	253.826		976	35170112	25550.9	253.826		976	71340096	25550.9	253.826		976	636778176	25550.9	253.826		976	-6971904	25550.9	253.826		976	93112256	25550.9	253.826
	977	209635840	25545.9	253.776		977	78394880	25545.9	253.776		977	86807040	25545.9	253.776		977	651860736	25545.9	253.776		977	-20442752	25545.9	253.776		977	132590848	25545.9	253.776
	978	236138880	25540.9	253.727		978	120000704	25540.9	253.727		978	94762432	25540.9	253.727		978	674720704	25540.9	253.727		978	-23577216	25540.9	253.727		978	181694336	25540.9	253.727
	979	273599040	25536	253.678		979	148963584	25536	253.678		979	95776320	25536	253.678		979	700248896	25536	253.678		979	-12939392	25536	253.678		979	223394816	25536	253.678
	980	317571968	25531	253.629		980	157678592	25531	253.629		980	92917056	25531	253.629		980	723072128	25531	253.629		980	11135232	25531	253.629		980	244895296	25531	253.629
	981	362471616	25526.1	253.579		981	145238656	25526.1	253.579		981	89164992	25526.1	253.579		981	739654016	25526.1	253.579		981	43853696	25526.1	253.579		981	242851392	25526.1	253.579
	982	403231232	25521.1	253.53		982	118090368	25521.1	253.53		982	85197952	25521.1	253.53		982	749505216	25521.1	253.53		982	77110144	25521.1	253.53		982	224237952	25521.1	253.53
	983	436279872	25516.1	253.481		983	87588736	25516.1	253.481		983	78676672	25516.1	253.481		983	755047808	25516.1	253.481		983	102340096	25516.1	253.481		983	202503360	25516.1	253.481
	984	459730240	25511.2	253.431		984	65399360	25511.2	253.431		984	65411136	25511.2	253.431		984	760247808	25511.2	253.431		984	114074880	25511.2	253.431		984	190832448	25511.2	253.431
	985	473114432	25506.2	253.382		985	58716736	25506.2	253.382		985	41866816	25506.2	253.382		985	768654464	25506.2	253.382		985	112652416	25506.2	253.382		985	195680000	25506.2	253.382
	986	477118720	25501.3	253.333		986	67385920	25501.3	253.333		986	7795712	25501.3	253.333		986	781720512	25501.3	253.333		986	104687104	25501.3	253.333		986	213606016	25501.3	253.333
	987	473533696	25496.3	253.283		987	84174208	25496.3	253.283		987	-32329664	25496.3	253.283		987	798131008	25496.3	253.283		987	100771072	25496.3	253.283		987	232897728	25496.3	253.283
	988	465252736	25491.3	253.234		988	98022656	25491.3	253.234		988	-69905024	25491.3	253.234		988	814393344	25491.3	253.234		988	111125376	25491.3	253.234		988	239218816	25491.3	253.234
	989	455930880	25486.4	253.185		989	98781120	25486.4	253.185		989	-94747840	25486.4	253.185		989	826371648	25486.4	253.185		989	140970240	25486.4	253.185		989	222641088	25486.4	253.185
	990	449033664	25481.4	253.136		990	81309760	25481.4	253.136		990	-98687936	25481.4	253.136		990	831036288	25481.4	253.136		990	187693056	25481.4	253.136		990	182766720	25481.4	253.136
	991	446444736	25476.4	253.086		991	47185536	25476.4	253.086		991	-78783744	25476.4	253.086		991	827638784	25476.4	253.086		991	241243520	25476.4	253.086		991	129540864	25476.4	253.086
	992	447275520	25471.5	253.037		992	3406592	25471.5	253.037		992	-38866496	25471.5	253.037		992	817826112	25471.5	253.037		992	287798784	25471.5	253.037		992	79356096	25471.5	253.037
	993	447694784	25466.5	252.988		993	-41125952	25466.5	252.988		993	11251584	25466.5	252.988		993	804724480	25466.5	252.988		993	315233024	25466.5	252.988		993	48209536	25466.5	252.988
	994	442265472	25461.6	252.938		994	-79591936	25461.6	252.938		994	58671680	25461.6	252.938		994	791492736	25461.6	252.938		994	318025472	25461.6	252.938		994	44996288	25461.6	252.938
	995	426522944	25456.6	252.889		995	-109821824	25456.6	252.889		995	91394048	25456.6	252.889		995	780057792	25456.6	252.889		995	299393024	25456.6	252.889		995	67903360	25456.6	252.889
	996	399724096	25451.6	252.84		996	-134336128	25451.6	252.84		996	102016064	25451.6	252.84		996	770594880	25451.6	252.84		996	269651200	25451.6	252.84		996	105409344	25451.6	252.84
	997	366315264	25446.7	252.791		997	-157985152	25446.7	252.791		997	89909056	25446.7	252.791		997	761909184	25446.7	252.791		997	241517440	25446.7	252.791		997	141292672	25446.7	252.791
	998	335019328	25441.7	252.741		998	-184471488	25441.7	252.741		998	61214656	25441.7	252.741		998	752418880	25441.7	252.741		998	224513408	25441.7	252.741		998	161314112	25441.7	252.741
	999	315474048	25436.7	252.692		999	-213530880	25436.7	252.692		999	26753280	25436.7	252.692		999	741162176	25436.7	252.692		999	221052160	25436.7	252.692		999	158620672	25436.7	252.692
	1000	313632640	25431.8	252.643		1000	-240194880	25431.8	252.643		1000	-1405120	25431.8	252.643		1000	728290432	25431.8	252.643		1000	226025856	25431.8	252.643		1000	135664128	25431.8	252.643
	1001	328010432	25426.8	252.593		1001	-256538688	25426.8	252.593		1001	-13602112	25426.8	252.593		1001	714819456	25426.8	252.593		1001	230031616	25426.8	252.593		1001	102106880	25426.8	252.593
	1002	348811328	25421.9	252.544		1002	-255132608	25421.9	252.544		1002	-5386112	25421.9	252.544		1002	701830272	25421.9	252.544		1002	224632064	25421.9	252.544		1002	69984128	25421.9	252.544
	1003	360882240	25416.9	252.495		1003	-232618432	25416.9	252.495		1003	21321408	25416.9	252.495		1003	689610688	25416.9	252.495		1003	207029632	25416.9	252.495		1003	48476736	25416.9	252.495
	1004	349726208	25411.9	252.445		1004	-191777728	25411.9	252.445		1004	58943232	25411.9	252.445		1004	677257024	25411.9	252.445		1004	181809920	25411.9	252.445		1004	40582528	25411.9	252.445
	1005	308231296	25407	252.396		1005	-141140544	25407	252.396		1005	96566336	25407	252.396		1005	663013184	25407	252.396		1005	158803456	25407	252.396		1005	42890112	25407	252.396
	1006	241129728	25402	252.347		1006	-92273216	25402	252.347		1006	123157312	25402	252.347		1006	645229632	25402	252.347		1006	148030336	25402	252.347		1006	48144640	25402	252.347
	1007	164892736	25397	252.298		1007	-55869440	25397	252.298		1007	130742720	25397	252.298		1007	623497088	25397	252.298		1007	154153984	25397	252.298		1007	49094016	25397	252.298
	1008	102600640	25392.1	252.248		1008	-38228736	25392.1	252.248		1008	116649984	25392.1	252.248		1008	599402112	25392.1	252.248		1008	173193216	25392.1	252.248		1008	41735104	25392.1	252.248
	1009	75529856	25387.1	252.199		1009	-39467392	25387.1	252.199		1009	84168576	25387.1	252.199		1009	576515840	25387.1	252.199		1009	193227648	25387.1	252.199		1009	26619008	25387.1	252.199
	1010	94790528	25382.2	252.15		1010	-54023424	25382.2	252.15		1010	41447040	25382.2	252.15		1010	559567616	25382.2	252.15		1010	198970240	25382.2	252.15		1010	7958720	25382.2	252.15
	1011	156546176	25377.2	252.1		1011	-73067328	25377.2	252.1		1011	-1034624	25377.2	252.1		1011	553101760	25377.2	252.1		1011	178236928	25377.2	252.1		1011	-8671808	25377.2	252.1
	1012	242993280	25372.2	252.051		1012	-87728128	25372.2	252.051		1012	-33631744	25372.2	252.051		1012	560105536	25372.2	252.051		1012	127414016	25372.2	252.051		1012	-18749120	25372.2	252.051
	1013	328905280	25367.3	252.002		1013	-91863424	25367.3	252.002		1013	-50342144	25367.3	252.002		1013	581061888	25367.3	252.002		1013	53455616	25367.3	252.002		1013	-20215680	25367.3	252.002
	1014	391170432	25362.3	251.953		1014	-83458816	25362.3	251.953		1014	-50369856	25362.3	251.953		1014	613668992	25362.3	251.953		1014	-28478848	25362.3	251.953		1014	-13492160	25362.3	251.953
	1015	417430016	25357.3	251.903		1015	-64408000	25357.3	251.903		1015	-37986240	25357.3	251.903		1015	653213184	25357.3	251.903		1015	-100660096	25357.3	251.903		1015	-451840	25357.3	251.903
	1016	410257728	25352.4	251.854		1016	-39091008	25352.4	251.854		1016	-20820928	25352.4	251.854		1016	693400448	25352.4	251.854		1016	-149160064	25352.4	251.854		1016	16834880	25352.4	251.854
	1017	385184384	25347.4	251.805		1017	-12539072	25347.4	251.805		1017	-7259776	25347.4	251.805		1017	727411840	25347.4	251.805		1017	-168204032	25347.4	251.805		1017	36847104	25347.4	251.805
	1018	363467584	25342.5	251.755		1018	11050688	25342.5	251.755		1018	-3899968	25342.5	251.755		1018	749009280	25342.5	251.755		1018	-160785664	25342.5	251.755		1018	58573888	25342.5	251.755
	1019	362703296	25337.5	251.706		1019	29022720	25337.5	251.706		1019	-13910912	25337.5	251.706		1019	753589184	25337.5	251.706		1019	-135641088	25337.5	251.706		1019	80945792	25337.5	251.706
	1020	389241152	25332.5	251.657		1020	40208000	25332.5	251.657		1020	-36717568	25332.5	251.657		1020	739090304	25332.5	251.657		1020	-102338048	25332.5	251.657		1020	102291712	25332.5	251.657
	1021	435531456	25327.6	251.607		1021	44443392	25327.6	251.607		1021	-68861120	25327.6	251.607		1021	706591808	25327.6	251.607		1021	-66978816	25327.6	251.607		1021	120282560	25327.6	251.607
	1022	483405440	25322.6	251.558		1022	42078592	25322.6	251.558		1022	-105454464	25322.6	251.558		1022	660370048	25322.6	251.558		1022	-30507904	25322.6	251.558		1022	132449536	25322.6	251.558
	1023	511795328	25317.6	251.509		1023	33733056	25317.6	251.509		1023	-141529280	25317.6	251.509		1023	607212288	25317.6	251.509		1023	9823744	25317.6	251.509		1023	136968064	25317.6	251.509
	1024	505608576	25312.7	251.46		1024	20310272	25312.7	251.46		1024	-172796864	25312.7	251.46		1024	554979648	25312.7	251.46		1024	56930048	25312.7	251.46		1024	133227136	25312.7	251.46
	1025	462109504	25307.7	251.41		1025	3083712	25307.7	251.41		1025	-195780032	25307.7	251.41		1025	510719872	25307.7	251.41		1025	110379520	25307.7	251.41		1025	121864192	25307.7	251.41
	1026	392310592	25302.8	251.361		1026	-16368768	25302.8	251.361		1026	-207666560	25302.8	251.361		1026	478918272	25302.8	251.361		1026	164892288	25302.8	251.361		1026	104306496	25302.8	251.361
	1027	316993216	25297.8	251.312		1027	-36477120	25297.8	251.312		1027	-206364288	25297.8	251.312		1027	460556992	25297.8	251.312		1027	211687936	25297.8	251.312		1027	82192128	25297.8	251.312
	1028	259126400	25292.8	251.262		1028	-56135168	25292.8	251.262		1028	-191037312	25292.8	251.262		1028	453433408	25292.8	251.262		1028	242001920	25292.8	251.262		1028	57104128	25292.8	251.262
	1029	235763904	25287.9	251.213		1029	-75059840	25287.9	251.213		1029	-162982144	25287.9	251.213		1029	453703744	25287.9	251.213		1029	250921472	25287.9	251.213		1029	30807680	25287.9	251.213
	1030	252495552	25282.9	251.164		1030	-93814784	25282.9	251.164		1030	-126316800	25282.9	251.164		1030	458059840	25282.9	251.164		1030	239527552	25282.9	251.164		1030	5765248	25282.9	251.164
	1031	302328000	25278	251.114		1031	-113417984	25278	251.114		1031	-87853952	25278	251.114		1031	465592448	25278	251.114		1031	214199936	25278	251.114		1031	-14598016	25278	251.114
	1032	369043776	25273	251.065		1032	-134671872	25273	251.065		1032	-55816704	25273	251.065		1032	478437120	25273	251.065		1032	183420288	25273	251.065		1032	-26376768	25273	251.065
	1033	433425856	25268	251.016		1033	-157528448	25268	251.016		1033	-37622400	25268	251.016		1033	500779328	25268	251.016		1033	153710976	25268	251.016		1033	-26517760	25268	251.016
	1034	479861376	25263.1	250.967		1034	-180822848	25263.1	250.967		1034	-37517760	25263.1	250.967		1034	536525248	25263.1	250.967		1034	126804480	25263.1	250.967		1034	-14539840	25263.1	250.967
	1035	500987200	25258.1	250.917		1035	-202558400	25258.1	250.917		1035	-55088448	25258.1	250.917		1035	586596800	25258.1	250.917		1035	99520384	25258.1	250.917		1035	6230464	25258.1	250.917
	1036	499035968	25253.1	250.868		1036	-220670592	25253.1	250.868		1036	-85407936	25253.1	250.868		1036	647075136	25253.1	250.868		1036	66427776	25253.1	250.868		1036	28753728	25253.1	250.868
	1037	483864768	25248.2	250.819		1037	-233958144	25248.2	250.819		1037	-120905280	25248.2	250.819		1037	709133056	25248.2	250.819		1037	23927040	25248.2	250.819		1037	44031808	25248.2	250.819
	1038	468785152	25243.2	250.769		1038	-242759552	25243.2	250.769		1038	-154238464	25243.2	250.769		1038	760974208	25243.2	250.769		1038	-26395776	25243.2	250.769		1038	44060800	25243.2	250.769
	1039	465855296	25238.3	250.72		1039	-249038848	25238.3	250.72		1039	-180938688	25238.3	250.72		1039	791139584	25238.3	250.72		1039	-76974464	25238.3	250.72		1039	24853056	25238.3	250.72
	1040	482186816	25233.3	250.671		1040	-255785472	25233.3	250.671		1040	-200646016	25233.3	250.671		1040	791946176	25233.3	250.671		1040	-116609536	25233.3	250.671		1040	-11783488	25233.3	250.671
	1041	518209728	25228.3	250.622		1041	-265932928	25228.3	250.622		1041	-216389632	25228.3	250.622		1041	761748608	25228.3	250.622		1041	-134975232	25228.3	250.622		1041	-58574400	25228.3	250.622
	1042	568069632	25223.4	250.572		1042	-281217280	25223.4	250.572		1042	-232299968	25223.4	250.572		1042	705210944	25223.4	250.572		1042	-127185408	25223.4	250.572		1042	-105186304	25223.4	250.572
	1043	621682624	25218.4	250.523		1043	-301436352	25218.4	250.523		1043	-250922752	25218.4	250.523		1043	631594368	25218.4	250.523		1043	-96225792	25218.4	250.523		1043	-141757312	25218.4	250.523
	1044	667625792	25213.4	250.474		1044	-324411840	25213.4	250.474		1044	-271524928	25213.4	250.474		1044	551847360	25213.4	250.474		1044	-52041856	25213.4	250.474		1044	-162093952	25213.4	250.474
	1045	696006784	25208.5	250.424		1045	-346665472	25208.5	250.424		1045	-290308672	25208.5	250.424		1045	475673984	25208.5	250.424		1045	-7640832	25208.5	250.424		1045	-165249344	25208.5	250.424
	1046	700638848	25203.5	250.375		1046	-364527872	25203.5	250.375		1046	-302480192	25203.5	250.375		1046	409611264	25203.5	250.375		1046	26012032	25203.5	250.375		1046	-154967104	25203.5	250.375
	1047	680131200	25198.6	250.326		1047	-375228288	25198.6	250.326		1047	-305133184	25198.6	250.326		1047	356580416	25198.6	250.326		1047	43974272	25198.6	250.326		1047	-137455808	25198.6	250.326
	1048	637786304	25193.6	250.276		1048	-377544512	25193.6	250.276		1048	-299403840	25193.6	250.276		1048	316682048	25193.6	250.276		1048	48403712	25193.6	250.276		1048	-118672128	25193.6	250.276
	1049	580446656	25188.6	250.227		1049	-371801152	25188.6	250.227		1049	-290624768	25188.6	250.227		1049	288534784	25188.6	250.227		1049	46355968	25188.6	250.227		1049	-102389376	25188.6	250.227
	1050	516631424	25183.7	250.178		1050	-359300608	25183.7	250.178		1050	-286158784	25183.7	250.178		1050	270389888	25183.7	250.178		1050	45476352	25183.7	250.178		1050	-89796352	25183.7	250.178
	1051	454449792	25178.7	250.129		1051	-341515200	25178.7	250.129		1051	-291776064	25178.7	250.129		1051	260582464	25178.7	250.129		1051	49726592	25178.7	250.129		1051	-80506368	25178.7	250.129
	1052	399826752	25173.7	250.079		1052	-319454848	25173.7	250.079		1052	-308280576	25173.7	250.079		1052	257372480	25173.7	250.079		1052	57211648	25173.7	250.079		1052	-74127488	25173.7	250.079
	1053	355505536	25168.8	250.03		1053	-293505152	25168.8	250.03		1053	-330126976	25168.8	250.03		1053	258603968	25168.8	250.03		1053	61113344	25168.8	250.03		1053	-71331520	25168.8	250.03
	1054	321070976	25163.8	249.981		1054	-263780096	25163.8	249.981		1054	-346950720	25163.8	249.981		1054	261665920	25163.8	249.981		1054	53223552	25163.8	249.981		1054	-73751040	25163.8	249.981
	1055	293926272	25158.9	249.931		1055	-230756608	25158.9	249.931		1055	-347592704	25158.9	249.931		1055	263978240	25158.9	249.931		1055	28330240	25158.9	249.931		1055	-82795136	25158.9	249.931
	1056	270838272	25153.9	249.882		1056	-195806080	25153.9	249.882		1056	-324977984	25153.9	249.882		1056	263822720	25153.9	249.882		1056	-12659712	25153.9	249.882		1056	-98165952	25153.9	249.882
	1057	249472896	25148.9	249.833		1057	-161275968	25148.9	249.833		1057	-279694080	25148.9	249.833		1057	261046848	25148.9	249.833		1057	-62350080	25148.9	249.833		1057	-117085184	25148.9	249.833
	1058	229358720	25144	249.784		1058	-130001152	25144	249.784		1058	-220580160	25144	249.784		1058	257173632	25144	249.784		1058	-109396096	25144	249.784		1058	-134862720	25144	249.784
	1059	211948096	25139	249.734		1059	-104420032	25139	249.734		1059	-161916480	25139	249.734		1059	254746944	25139	249.734		1059	-142774272	25139	249.734		1059	-146674112	25139	249.734
	1060	199810112	25134	249.685		1060	-85700096	25134	249.685		1060	-118300928	25134	249.685		1060	256168256	25134	249.685		1060	-155838464	25134	249.685		1060	-149669056	25134	249.685
	1061	195339840	25129.1	249.636		1061	-73310336	25129.1	249.636		1061	-99343552	25129.1	249.636		1061	262579712	25129.1	249.636		1061	-148407424	25129.1	249.636		1061	-144262848	25129.1	249.636
	1062	199549824	25124.1	249.586		1062	-65292608	25124.1	249.586		1062	-106402880	25124.1	249.586		1062	273344576	25124.1	249.586		1062	-126101376	25124.1	249.586		1062	-133821760	25124.1	249.586
	1063	211454848	25119.2	249.537		1063	-59157056	25119.2	249.537		1063	-132686784	25119.2	249.537		1063	286355392	25119.2	249.537		1063	-97432064	25119.2	249.537		1063	-122794816	25119.2	249.537
	1064	228279488	25114.2	249.488		1064	-53017088	25114.2	249.488		1064	-166558912	25114.2	249.488		1064	298947072	25114.2	249.488		1064	-70109952	25114.2	249.488		1064	-114208896	25114.2	249.488
	1065	246354880	25109.2	249.438		1065	-46439488	25109.2	249.438		1065	-196507136	25109.2	249.438		1065	308861824	25109.2	249.438		1065	-48255488	25109.2	249.438		1065	-107867520	25109.2	249.438
	1066	262272512	25104.3	249.389		1066	-40600192	25104.3	249.389		1066	-215571328	25104.3	249.389		1066	314704576	25104.3	249.389		1066	-31617664	25104.3	249.389		1066	-100303552	25104.3	249.389
	1067	273770176	25099.3	249.34		1067	-37660224	25099.3	249.34		1067	-223374016	25099.3	249.34		1067	315657280	25099.3	249.34		1067	-16868480	25099.3	249.34		1067	-86658368	25099.3	249.34
	1068	279985536	25094.4	249.291		1068	-39654720	25094.4	249.291		1068	-225056576	25094.4	249.291		1068	310708544	25094.4	249.291		1068	-70400	25094.4	249.291		1068	-63626688	25094.4	249.291
	1069	281032576	25089.4	249.241		1069	-47439872	25089.4	249.241		1069	-227845248	25089.4	249.241		1069	298009280	25089.4	249.241		1069	21025408	25089.4	249.241		1069	-31959808	25089.4	249.241
	1070	277204736	25084.4	249.192		1070	-60224192	25084.4	249.192		1070	-236989056	25084.4	249.192		1070	274966528	25084.4	249.192		1070	45936640	25084.4	249.192		1070	2867392	25084.4	249.192
	1071	268302016	25079.5	249.143		1071	-75928320	25079.5	249.143		1071	-252987776	25079.5	249.143		1071	239296128	25079.5	249.143		1071	71972736	25079.5	249.143		1071	32377472	25079.5	249.143
	1072	253527424	25074.5	249.093		1072	-92193024	25074.5	249.093		1072	-271319936	25074.5	249.093		1072	190659328	25074.5	249.093		1072	95806720	25074.5	249.093		1072	48561408	25074.5	249.093
	1073	232105280	25069.5	249.044		1073	-107509568	25069.5	249.044		1073	-284661760	25069.5	249.044		1073	132051264	25069.5	249.044		1073	115070464	25069.5	249.044		1073	47535872	25069.5	249.044
	1074	204374144	25064.6	248.995		1074	-121856768	25064.6	248.995		1074	-286444032	25064.6	248.995		1074	70053312	25064.6	248.995		1074	129069568	25064.6	248.995		1074	31621888	25064.6	248.995
	1075	172782592	25059.6	248.945		1075	-136468800	25059.6	248.945		1075	-274045824	25059.6	248.945		1075	13507264	25059.6	248.945		1075	138294656	25059.6	248.945		1075	8752640	25059.6	248.945
	1076	142138752	25054.7	248.896		1076	-152806400	25054.7	248.896		1076	-250179008	25054.7	248.896		1076	-29077120	25054.7	248.896		1076	143154304	25054.7	248.896		1076	-10656320	25054.7	248.896
	1077	118706944	25049.7	248.847		1077	-171261952	25049.7	248.847		1077	-221912064	25049.7	248.847		1077	-52382144	25049.7	248.847		1077	142824832	25049.7	248.847		1077	-18039552	25049.7	248.847
	1078	108230848	25044.7	248.798		1078	-190330816	25044.7	248.798		1078	-197858240	25044.7	248.798		1078	-56151232	25044.7	248.798		1078	135070208	25044.7	248.798		1078	-10286912	25044.7	248.798
	1079	113505600	25039.8	248.748		1079	-206812800	25039.8	248.748		1079	-184812352	25039.8	248.748		1079	-45159936	25039.8	248.748		1079	117321472	25039.8	248.748		1079	8995136	25039.8	248.748
	1080	132474432	25034.8	248.699		1080	-217118592	25034.8	248.699		1080	-185255936	25034.8	248.699		1080	-27205952	25034.8	248.699		1080	88559744	25034.8	248.699		1080	31128192	25034.8	248.699
	1081	157797312	25029.8	248.65		1081	-219164160	25029.8	248.65		1081	-196654016	25029.8	248.65		1081	-9950208	25029.8	248.65		1081	50992128	25029.8	248.65		1081	46156160	25029.8	248.65
	1082	178394624	25024.9	248.6		1082	-213950336	25024.9	248.6		1082	-212631872	25024.9	248.6		1082	1999168	25024.9	248.6		1082	10476416	25024.9	248.6		1082	47096448	25024.9	248.6
	1083	182724608	25019.9	248.551		1083	-205949376	25019.9	248.551		1083	-225355648	25019.9	248.551		1083	8462528	25019.9	248.551		1083	-24814080	25019.9	248.551		1083	32805056	25019.9	248.551
	1084	162809088	25015	248.502		1084	-201896512	25015	248.502		1084	-228070080	25015	248.502		1084	12943296	25015	248.502		1084	-47142016	25015	248.502		1084	8300032	25015	248.502
	1085	117574464	25010	248.453		1085	-208307712	25010	248.453		1085	-216875328	25010	248.453		1085	20186560	25010	248.453		1085	-52264832	25010	248.453		1085	-17444096	25010	248.453
	1086	54158208	25005	248.403		1086	-228689600	25005	248.403		1086	-191312768	25005	248.403		1086	33271424	25005	248.403		1086	-41418752	25005	248.403		1086	-35136768	25005	248.403
	1087	-13533760	25000.1	248.354		1087	-261651648	25000.1	248.354		1087	-153889088	25000.1	248.354		1087	51672704	25000.1	248.354		1087	-21210880	25000.1	248.354		1087	-38634048	25000.1	248.354
	1088	-68753792	24995.1	248.305		1088	-300829248	24995.1	248.305		1088	-109031872	24995.1	248.305		1088	71231680	24995.1	248.305		1088	-1276160	24995.1	248.305		1088	-26852032	24995.1	248.305
	1089	-97099520	24990.1	248.255		1089	-336787840	24990.1	248.255		1089	-62015872	24990.1	248.255		1089	86024192	24990.1	248.255		1089	9451264	24990.1	248.255		1089	-3572480	24990.1	248.255
	1090	-91188800	24985.2	248.206		1090	-360222400	24985.2	248.206		1090	-18177920	24985.2	248.206		1090	91177152	24985.2	248.206		1090	6350592	24985.2	248.206		1090	24464192	24985.2	248.206
	1091	-53153728	24980.2	248.157		1091	-365182784	24980.2	248.157		1091	17560960	24980.2	248.157		1091	85226944	24980.2	248.157		1091	-8907136	24980.2	248.157		1091	50138112	24980.2	248.157
	1092	5962496	24975.3	248.107		1092	-351020544	24975.3	248.107		1092	41043904	24975.3	248.107		1092	70862336	24975.3	248.107		1092	-28878208	24975.3	248.107		1092	68082432	24975.3	248.107
	1093	69702976	24970.3	248.058		1093	-322292160	24970.3	248.058		1093	49276992	24970.3	248.058		1093	53709632	24970.3	248.058		1093	-43200384	24970.3	248.058		1093	75685504	24970.3	248.058
	1094	121323136	24965.3	248.009		1094	-286726720	24965.3	248.009		1094	40904960	24965.3	248.009		1094	39794112	24965.3	248.009		1094	-42650880	24965.3	248.009		1094	72928000	24965.3	248.009
	1095	148712256	24960.4	247.96		1095	-252183040	24960.4	247.96		1095	16610176	24960.4	247.96		1095	32951424	24960.4	247.96		1095	-22787456	24960.4	247.96		1095	61537728	24960.4	247.96
	1096	147407680	24955.4	247.91		1096	-223906112	24955.4	247.91		1096	-20788928	24955.4	247.91		1096	33451776	24955.4	247.91		1096	14254976	24955.4	247.91		1096	44086784	24955.4	247.91
	1097	120789824	24950.4	247.861		1097	-203184576	24950.4	247.861		1097	-66688640	24950.4	247.861		1097	38458112	24950.4	247.861		1097	60466816	24950.4	247.861		1097	23432320	24950.4	247.861
	1098	77648192	24945.5	247.812		1098	-187827264	24945.5	247.812		1098	-115459136	24945.5	247.812		1098	43998016	24945.5	247.812		1098	104802432	24945.5	247.812		1098	2512704	24945.5	247.812
	1099	28277696	24940.5	247.762		1099	-174040896	24940.5	247.762		1099	-161406528	24940.5	247.762		1099	47371520	24940.5	247.762		1099	136975488	24940.5	247.762		1099	-15773120	24940.5	247.762
	1100	-19279360	24935.6	247.713		1100	-158703232	24935.6	247.713		1100	-199665088	24935.6	247.713		1100	48722944	24935.6	247.713		1100	150716160	24935.6	247.713		1100	-28895680	24935.6	247.713
	1101	-61451072	24930.6	247.664		1101	-140944320	24930.6	247.664		1101	-226828672	24930.6	247.664		1101	50959424	24930.6	247.664		1101	145319168	24930.6	247.664		1101	-35280768	24930.6	247.664
	1102	-99169472	24925.6	247.615		1102	-122384512	24925.6	247.615		1102	-241272320	24925.6	247.615		1102	58065152	24925.6	247.615		1102	125068160	24925.6	247.615		1102	-34900352	24925.6	247.615
	1103	-136017024	24920.7	247.565		1103	-106086080	24920.7	247.565		1103	-243237952	24920.7	247.565		1103	72685568	24920.7	247.565		1103	96987136	24920.7	247.565		1103	-29458432	24920.7	247.565
	1104	-175498304	24915.7	247.516		1104	-94905408	24915.7	247.516		1104	-234767424	24915.7	247.516		1104	94228864	24915.7	247.516		1104	67991424	24915.7	247.516		1104	-21893248	24915.7	247.516
	1105	-218681664	24910.7	247.467		1105	-90165120	24910.7	247.467		1105	-219484480	24910.7	247.467		1105	118469824	24910.7	247.467		1105	42625536	24910.7	247.467		1105	-15269312	24910.7	247.467
	1106	-263144256	24905.8	247.417		1106	-91318336	24905.8	247.417		1106	-202132160	24905.8	247.417		1106	138894848	24905.8	247.417		1106	22215936	24905.8	247.417		1106	-11507456	24905.8	247.417
	1107	-303511680	24900.8	247.368		1107	-96693056	24900.8	247.368		1107	-187768384	24900.8	247.368		1107	149169984	24900.8	247.368		1107	5580032	24900.8	247.368		1107	-10563008	24900.8	247.368
	1108	-333214208	24895.9	247.319		1108	-104807168	24895.9	247.319		1108	-180660800	24895.9	247.319		1108	145592000	24895.9	247.319		1108	-9226880	24895.9	247.319		1108	-10496320	24895.9	247.319
	1109	-346667712	24890.9	247.269		1109	-115441408	24890.9	247.269		1109	-183143936	24890.9	247.269		1109	128423040	24890.9	247.269		1109	-23051136	24890.9	247.269		1109	-8452480	24890.9	247.269
	1110	-341063680	24885.9	247.22		1110	-129808064	24885.9	247.22		1110	-194875136	24885.9	247.22		1110	101586112	24885.9	247.22		1110	-34557184	24885.9	247.22		1110	-2101440	24885.9	247.22
	1111	-317236800	24881	247.171		1111	-149666240	24881	247.171		1111	-212898048	24881	247.171		1111	70986944	24881	247.171		1111	-40414592	24881	247.171		1111	9157696	24881	247.171
	1112	-279492864	24876	247.122		1112	-175832832	24876	247.122		1112	-232654976	24876	247.122		1112	42335808	24876	247.122		1112	-36666496	24876	247.122		1112	23805248	24876	247.122
	1113	-234611776	24871.1	247.072		1113	-206910528	24871.1	247.072		1113	-249655936	24871.1	247.072		1113	19478720	24871.1	247.072		1113	-20665984	24871.1	247.072		1113	38780928	24871.1	247.072
	1114	-190382400	24866.1	247.023		1114	-238986240	24866.1	247.023		1114	-261141056	24866.1	247.023		1114	3874368	24866.1	247.023		1114	7262592	24866.1	247.023		1114	50696704	24866.1	247.023
	1115	-154003840	24861.1	246.974		1115	-266584896	24861.1	246.974		1115	-266965440	24861.1	246.974		1115	-4794240	24861.1	246.974		1115	43179264	24861.1	246.974		1115	57037504	24861.1	246.974
	1116	-130607616	24856.2	246.924		1116	-284527936	24856.2	246.924		1116	-269222080	24856.2	246.924		1116	-7460864	24856.2	246.924		1116	80221056	24856.2	246.924		1116	56767232	24856.2	246.924
	1117	-122116672	24851.2	246.875		1117	-289859264	24851.2	246.875		1117	-270697408	24851.2	246.875		1117	-4758080	24851.2	246.875		1117	110440320	24851.2	246.875		1117	50131200	24851.2	246.875
	1118	-126683840	24846.2	246.826		1118	-282933696	24846.2	246.826		1118	-272867648	24846.2	246.826		1118	3115584	24846.2	246.826		1118	127145984	24846.2	246.826		1118	37931072	24846.2	246.826
	1119	-138964352	24841.3	246.777		1119	-267141440	24841.3	246.777		1119	-274470464	24841.3	246.777		1119	15739456	24841.3	246.777		1119	126924928	24841.3	246.777		1119	20845184	24841.3	246.777
	1120	-151363648	24836.3	246.727		1120	-247388096	24836.3	246.727		1120	-271517376	24836.3	246.727		1120	31530816	24836.3	246.727		1120	110635648	24836.3	246.727		1120	-690752	24836.3	246.727
	1121	-156114048	24831.4	246.678		1121	-228050816	24831.4	246.678		1121	-258960448	24831.4	246.678		1121	47237440	24831.4	246.678		1121	83045120	24831.4	246.678		1121	-25912768	24831.4	246.678
	1122	-147648128	24826.4	246.629		1122	-211377792	24826.4	246.629		1122	-233389376	24826.4	246.629		1122	58361984	24826.4	246.629		1122	51255424	24826.4	246.629		1122	-52832896	24826.4	246.629
	1123	-124445888	24821.4	246.579		1123	-197075392	24821.4	246.579		1123	-195507264	24821.4	246.579		1123	60508480	24821.4	246.579		1123	22484096	24821.4	246.579		1123	-77679552	24821.4	246.579
	1124	-89552320	24816.5	246.53		1124	-183240512	24816.5	246.53		1124	-151070144	24816.5	246.53		1124	51109888	24816.5	246.53		1124	1961728	24816.5	246.53		1124	-95241344	24816.5	246.53
	1125	-49380288	24811.5	246.481		1125	-168128320	24811.5	246.481		1125	-109566336	24811.5	246.481		1125	30732544	24811.5	246.481		1125	-8363136	24811.5	246.481		1125	-100219072	24811.5	246.481
	1126	-11120128	24806.5	246.431		1126	-151827072	24806.5	246.431		1126	-80930816	24806.5	246.431		1126	3297088	24806.5	246.431		1126	-9933824	24806.5	246.431		1126	-89099648	24806.5	246.431
	1127	20226048	24801.6	246.382		1127	-136942720	24801.6	246.382		1127	-71571776	24801.6	246.382		1127	-24961920	24801.6	246.382		1127	-6562432	24801.6	246.382		1127	-61680704	24801.6	246.382
	1128	43858944	24796.6	246.333		1128	-127860416	24796.6	246.333		1128	-81444608	24796.6	246.333		1128	-47407488	24796.6	246.333		1128	-2727936	24796.6	246.333		1128	-21442240	24796.6	246.333
	1129	63208128	24791.7	246.284		1129	-128835456	24791.7	246.284		1129	-103586816	24791.7	246.284		1129	-59007488	24791.7	246.284		1129	-1854592	24791.7	246.284		1129	25523776	24791.7	246.284
	1130	83787008	24786.7	246.234		1130	-141743488	24786.7	246.234		1130	-126513152	24786.7	246.234		1130	-57656576	24786.7	246.234		1130	-5204480	24786.7	246.234		1130	72592704	24786.7	246.234
	1131	109744320	24781.7	246.185		1131	-164523776	24781.7	246.185		1131	-138612992	24781.7	246.185		1131	-44372800	24781.7	246.185		1131	-11738880	24781.7	246.185		1131	114725376	24781.7	246.185
	1132	140730432	24776.8	246.136		1132	-191095616	24776.8	246.136		1132	-132758528	24776.8	246.136		1132	-22438848	24776.8	246.136		1132	-18911104	24776.8	246.136		1132	149599744	24776.8	246.136
	1133	170723648	24771.8	246.086		1133	-212919360	24771.8	246.086		1133	-109175040	24771.8	246.086		1133	4012736	24771.8	246.086		1133	-23982464	24771.8	246.086		1133	177227456	24771.8	246.086
	1134	189667136	24766.8	246.037		1134	-221690368	24766.8	246.037		1134	-75341184	24766.8	246.037		1134	31328064	24766.8	246.037		1134	-25260160	24766.8	246.037		1134	198328064	24766.8	246.037
	1135	187460864	24761.9	245.988		1135	-212180672	24761.9	245.988		1135	-42959680	24761.9	245.988		1135	57081728	24761.9	245.988		1135	-22706432	24761.9	245.988		1135	212429312	24761.9	245.988
	1136	158642432	24756.9	245.938		1136	-184167488	24756.9	245.938		1136	-23302720	24756.9	245.938		1136	80111936	24756.9	245.938		1136	-17661952	24756.9	245.938		1136	216863744	24756.9	245.938
	1137	105582080	24752	245.889		1137	-142727872	24752	245.889		1137	-22907456	24752	245.889		1137	100038080	24752	245.889		1137	-11823616	24752	245.889		1137	207398528	24752	245.889
	1138	38531648	24747	245.84		1138	-96777856	24747	245.84		1138	-41384512	24747	245.84		1138	116630464	24747	245.84		1138	-5966848	24747	245.84		1138	180370432	24747	245.84
	1139	-27764032	24742	245.791		1139	-56354944	24742	245.791		1139	-72119488	24742	245.791		1139	129353792	24742	245.791		1139	947200	24742	245.791		1139	135328384	24742	245.791
	1140	-79574528	24737.1	245.741		1140	-29563584	24737.1	245.741		1140	-105357568	24737.1	245.741		1140	137222336	24737.1	245.741		1140	11776768	24737.1	245.741		1140	76785408	24737.1	245.741
	1141	-109409728	24732.1	245.692		1141	-20184064	24732.1	245.692		1141	-132176320	24732.1	245.692		1141	138909376	24732.1	245.692		1141	30174208	24732.1	245.692		1141	13987712	24732.1	245.692
	1142	-118574656	24727.1	245.643		1142	-26701568	24727.1	245.643		1142	-147592000	24727.1	245.643		1142	132976128	24727.1	245.643		1142	58852864	24727.1	245.643		1142	-41497088	24727.1	245.643
	1143	-115825024	24722.2	245.593		1143	-43039040	24722.2	245.593		1143	-151599040	24722.2	245.593		1143	118122752	24722.2	245.593		1143	97824896	24722.2	245.593		1143	-79506176	24722.2	245.593
	1144	-112695616	24717.2	245.544		1144	-60736192	24717.2	245.544		1144	-147996224	24717.2	245.544		1144	93464768	24717.2	245.544		1144	143388160	24717.2	245.544		1144	-94764736	24717.2	245.544
	1145	-117669952	24712.3	245.495		1145	-71877312	24712.3	245.495		1145	-141874496	24712.3	245.495		1145	58888000	24712.3	245.495		1145	188416512	24712.3	245.495		1145	-88598592	24712.3	245.495
	1146	-131956032	24707.3	245.446		1146	-71836544	24707.3	245.446		1146	-137150592	24707.3	245.446		1146	15477056	24707.3	245.446		1146	224031744	24707.3	245.446		1146	-68114048	24707.3	245.446
	1147	-148913920	24702.3	245.396		1147	-60949504	24702.3	245.396		1147	-135319040	24702.3	245.396		1147	-34121472	24702.3	245.396		1147	242192384	24702.3	245.396		1147	-43217152	24702.3	245.396
	1148	-157443648	24697.4	245.347		1148	-44529280	24697.4	245.347		1148	-135829952	24697.4	245.347		1148	-85646464	24697.4	245.347		1148	238327296	24697.4	245.347		1148	-22804288	24697.4	245.347
	1149	-147716096	24692.4	245.298		1149	-31141952	24692.4	245.298		1149	-137603520	24692.4	245.298		1149	-133703104	24692.4	245.298		1149	213067392	24692.4	245.298		1149	-11774080	24692.4	245.298
	1150	-116452800	24687.4	245.248		1150	-29627968	24687.4	245.248		1150	-140636096	24687.4	245.248		1150	-172802560	24687.4	245.248		1150	172398336	24687.4	245.248		1150	-10051648	24687.4	245.248
	1151	-69132672	24682.5	245.199		1151	-45817088	24682.5	245.199		1151	-146702016	24682.5	245.199		1151	-198701696	24682.5	245.199		1151	126107648	24682.5	245.199		1151	-13818624	24682.5	245.199
	1152	-17969472	24677.5	245.15		1152	-80074048	24677.5	245.15		1152	-158737920	24677.5	245.15		1152	-209555456	24677.5	245.15		1152	85001728	24677.5	245.15		1152	-18119680	24677.5	245.15
	1153	23426560	24672.6	245.1		1153	-126624384	24672.6	245.1		1153	-179280896	24672.6	245.1		1153	-206384448	24672.6	245.1		1153	57808640	24672.6	245.1		1153	-19460736	24672.6	245.1
	1154	46132416	24667.6	245.051		1154	-175050688	24667.6	245.051		1154	-208872384	24667.6	245.051		1154	-192605056	24667.6	245.051		1154	48781824	24667.6	245.051		1154	-17177920	24667.6	245.051
	1155	49749184	24662.6	245.002		1155	-213581824	24662.6	245.002		1155	-245356992	24662.6	245.002		1155	-172775296	24662.6	245.002		1155	56755072	24662.6	245.002		1155	-13113536	24662.6	245.002
	1156	42056064	24657.7	244.953		1156	-233090496	24657.7	244.953		1156	-284495104	24657.7	244.953		1156	-151081728	24657.7	244.953		1156	75885952	24657.7	244.953		1156	-10054016	24657.7	244.953
	1157	34579904	24652.7	244.903		1157	-230353984	24652.7	244.903		1157	-321571008	24652.7	244.903		1157	-130221440	24652.7	244.903		1157	97742080	24652.7	244.903		1157	-9982784	24652.7	244.903
	1158	36210368	24647.8	244.854		1158	-209305152	24647.8	244.854		1158	-353117248	24647.8	244.854		1158	-111133440	24647.8	244.854		1158	113980416	24647.8	244.854		1158	-13179968	24647.8	244.854
	1159	48012416	24642.8	244.805		1159	-179699456	24642.8	244.805		1159	-377815168	24642.8	244.805		1159	-93594112	24642.8	244.805		1159	118744064	24642.8	244.805		1159	-18607168	24642.8	244.805
	1160	61879424	24637.8	244.755		1160	-153595072	24637.8	244.755		1160	-396100416	24637.8	244.755		1160	-77240320	24637.8	244.755		1160	110099584	24637.8	244.755		1160	-25205504	24637.8	244.755
	1161	63852800	24632.9	244.706		1161	-140927040	24632.9	244.706		1161	-408750976	24632.9	244.706		1161	-62362816	24632.9	244.706		1161	90218496	24632.9	244.706		1161	-33177216	24632.9	244.706
	1162	40675904	24627.9	244.657		1162	-145858560	24627.9	244.657		1162	-415348480	24627.9	244.657		1162	-49966720	24627.9	244.657		1162	64437888	24627.9	244.657		1162	-44326912	24627.9	244.657
	1163	-13452672	24622.9	244.608		1163	-165333120	24622.9	244.608		1163	-413625408	24622.9	244.608		1163	-41044224	24622.9	244.608		1163	39625472	24622.9	244.608		1163	-61100928	24622.9	244.608
	1164	-93129216	24618	244.558		1164	-190396352	24618	244.558		1164	-400252864	24618	244.558		1164	-35517440	24618	244.558		1164	22372992	24618	244.558		1164	-84771136	24618	244.558
	1165	-182835776	24613	244.509		1165	-209755456	24613	244.509		1165	-372814016	24613	244.509		1165	-31582336	24613	244.509		1165	17459840	24613	244.509		1165	-113789312	24613	244.509
	1166	-262476032	24608.1	244.46		1166	-214143936	24608.1	244.46		1166	-331964864	24608.1	244.46		1166	-26041216	24608.1	244.46		1166	26839552	24608.1	244.46		1166	-143351808	24608.1	244.46
	1167	-314906496	24603.1	244.41		1167	-199758336	24603.1	244.41		1167	-282538176	24603.1	244.41		1167	-15693824	24603.1	244.41		1167	49244544	24603.1	244.41		1167	-166631680	24603.1	244.41
	1168	-332134528	24598.1	244.361		1168	-169450240	24598.1	244.361		1168	-232752128	24598.1	244.361		1168	780864	24598.1	244.361		1168	80393984	24598.1	244.361		1168	-177246656	24598.1	244.361
	1169	-317523776	24593.2	244.312		1169	-131313920	24593.2	244.312		1169	-191591872	24593.2	244.312		1169	21422784	24593.2	244.312		1169	113767680	24593.2	244.312		1169	-171831360	24593.2	244.312
	1170	-283236160	24588.2	244.262		1170	-95390272	24588.2	244.262		1170	-165388928	24588.2	244.262		1170	40950016	24588.2	244.262		1170	141878144	24588.2	244.262		1170	-151453312	24588.2	244.262
	1171	-244302976	24583.2	244.213		1171	-69938112	24583.2	244.213		1171	-155140928	24583.2	244.213		1171	52379776	24583.2	244.213		1171	157900032	24583.2	244.213		1171	-121157824	24583.2	244.213
	1172	-212147456	24578.3	244.164		1172	-58805504	24578.3	244.164		1172	-155905280	24578.3	244.164		1172	49787648	24578.3	244.164		1172	157379072	24578.3	244.164		1172	-87873088	24578.3	244.164
	1173	-190433088	24573.3	244.115		1173	-60851264	24573.3	244.115		1173	-158714368	24573.3	244.115		1173	31035264	24573.3	244.115		1173	139588992	24573.3	244.115		1173	-57753792	24573.3	244.115
	1174	-174836800	24568.4	244.065		1174	-71418048	24568.4	244.065		1174	-154306496	24568.4	244.065		1174	-817984	24568.4	244.065		1174	108061696	24568.4	244.065		1174	-34329088	24568.4	244.065
	1175	-156427776	24563.4	244.016		1175	-84971008	24563.4	244.016		1175	-137085888	24563.4	244.016		1175	-38190976	24563.4	244.016		1175	69932416	24563.4	244.016		1175	-18370112	24563.4	244.016
[truncated: 7,017 more rows]

## Sheet: Figure3
AIDF	1	-277304512	30389	301.889	CIDF	1	-171205184	30389	301.889	KIDF	1	-63339520	30389	301.889	BIDF	1	-31785792	30389	301.889	OIDF	1	-79885312	30389	301.889	SIDF	1	21531520	30389	301.889
[truncated: 8,191 more rows]

[truncated: 8 more sheets: Figure5, Figure6&7, Figure8&S3&S4&S5, Figure9, Figure S2, Table1&2, Table1&2_, Table1&2__]
